# Supplementary material
Source: publisher figshare collection journal article supplement (https://frontiersin.figshare.com/ndownloader/files/15085706)
Supplement: Supplementary file 1 [file 15085706]

Archive with 2 entries (2 files):
- supplemental_RG_13.csv
- supplemental_TX_12.csv
