# Supplementary material
Source: publisher figshare collection journal article supplement (https://frontiersin.figshare.com/ndownloader/files/15085706)
Supplement: Supplementary file 1 [file 15085706 › supplemental_RG_13.csv]

COMID	wet_pct	fldpop_EA	fld_pop	dasy_pop	dasypopNA	fldpct_EA	fldpct_NA	fld_pct	wetpct_up	fldpopEAd	fld_popd	dasy_popd	EA_pct_d	fld_pct_d
17905797	0.0392376823735	0.0		0.115320353303	0.0	0.0	0.0		0.0392376823735	0.0028307488537410003	0.0	0.25589969637800003	0.00520023909145371	0.0
17906829	0.19975978136300002	0.8340846218179999	0.8322225549869999	5.58616926592	0.0	0.537219730942	0.0	0.580116067888249	0.15395371699303992	15.22376942126894	5.947912129236982	44.33421843610695	0.3064031264092713	0.2493363051916051
17906917	0.11286004763499999	0.0235192889522	0.023475390946299995	2.58573489264	0.0	0.255033557047	0.0	0.23572183185279466	0.014403267836331312	73.64101964261219	71.3924157777043	272.274567510098	0.12031758957672585	0.12083626845220932
17905983	0.0517764816407	0.0		0.0	0.0	0.0108747044917	0.0		0.04053510807364077	0.0	0.0	0.2380932313391	0.036504930451271934	0.0
17906771	0.0512003983524	0.0		0.0	0.0	0.0634920634921	0.0		0.010916992977712526	19.68884404549102	3.83697975957	197.276735788064	0.08037467895469706	0.027919052381839247
17905813	0.147197869416	0.0		2.82064091222	0.0	0.053425518541800006	0.0		0.061986512986063766	0.0	0.0	2.8659764438622286	0.01591981132074842	0.0
17907017	0.0122356348351	0.0		0.537430848868	0.0	0.0115122972266	0.0		0.03661935623540954	1.89493044057218	1.54937242984	28.944835889808	0.01903921975511645	0.012202786524982828
17908241	0.0	0.0		8.24864981131	0.0	0.0	0.0		0.0	89.057987392254	94.998812284068	296.322598453864	0.1431733836840962	0.14322505903790952
17906125	0.08554538144130001	0.0		0.0	0.0	0.028818443804	0.0		0.0672972975511579	0.0	0.0	0.0	0.013719449578952405	0.0
17908129	0.0326145508882	0.0		0.0	0.0	0.0	0.0		0.0326145508882	0.0	0.0	0.0	0.0006145088780361	0.0
17907041	0.023306152507099998	0.0		0.0	0.0	0.126984126984	0.0		0.007525461199303782	7.35286105392	0.0	26.000000617199998	0.02684641087683814	0.0
17906133	0.0055591344582	0.0		0.0	0.0	0.0105263157895	0.0		0.012369941605157937	0.0	0.0	0.0	0.11147428178260207	0.0
17908143	0.00186106613441	0.0		0.0	0.0	0.0233948988566	0.0		0.009661078797640676	0.8086048697730001	0.525261674193	40.300368551300004	0.025924870782625814	0.004389971265470555
17906169	0.0368208607803	0.0		0.0	0.0	0.0	0.0		0.04245266658331619	0.0	0.0	0.0	0.00043337320366784466	0.0
17906747	0.051549404117	0.005699816625569999		0.379928401948	0.0	0.0115894039735	0.0		0.04963472488226303	0.41229023555959	0.0	2.5542445793063	0.011442555724576284	0.0
17906359	0.13064810376	0.00174009670081		0.0144608036171	0.0	0.0605564648118	0.0		0.054839271081254616	0.016800933663027602	0.0	0.143047949473763	0.08960926907436854	0.0
17905851	0.0	0.00165489932988		0.0241702402127	0.0	0.00850040096231	0.0		0.008609124955545706	0.1412333923508204	0.0	3.4614885621684697	0.01943524490151876	0.0
17906597	0.0244871545364	0.00461629813071		0.0839208160178	0.0	0.0310828025478	0.0		0.010250046088538741	0.8965011371688101	0.0	98.4768169347368	0.03201146679408624	0.0
17907049	0.00656540905767	0.0		0.0	0.0	0.0	0.0		0.00656540905767	0.0	0.0	0.0	0.0031508264462821213	0.0
17906901	0.118852314399	2.43318463182	7.676755849710001	16.5074753638	0.0	0.0807522123894	0.0	0.1027780760967736	0.050727412063496784	65.65274947232	67.84122155250999	217.53232966139	0.13095530451892629	0.1322173026397865
17908155	0.00642095731652	0.0		0.436151605041	0.0	0.000337780780274	0.0		0.00642095731652	8.782968278977	2.77383399755	153.96800872780105	0.006452037658838657	0.0014357948382138829
17906669	0.00929371790963	0.0		0.495434586453	0.0	0.0420427282075	0.0		0.007958250513682003	1.9871476084123	0.0	4.1661335739490015	0.05652849740933416	0.0
17908141	0.0256770267305	0.0		4.03348645248	0.0	0.0060189165950100005	0.0		0.0054501710931437	1.97479082357	0.0	6.899841783943311	0.030921996526444718	0.0
17906861	0.0411272395901	0.0005714664584959999		0.06900457486339999	0.0	0.0271424981151	0.0		0.029388252398599237	0.0005714664584959999	0.0	0.17101133770494995	0.034631412559275716	0.0
17907067	0.023593294344500002	0.0		0.45686417789	0.0	0.00895803866101	0.0		0.03570864689607569	0.0	0.0	1.3565253371489998	0.016560362714216934	0.0
17906333	0.0517458473348	0.0049202734298900005		0.0441024508655	0.0	0.127082048118	0.0		0.10659769024526984	0.0063603534581508	0.0	0.47063131182924	0.04795190829019027	0.0
17905881	0.0317294101482	6.00033345108e-05		0.416928327442	0.0	0.00130335614207	0.0		0.029400668042215725	4.384784326537461	0.0	10.282438792122	0.011476525289177263	0.0
17906943	5.24335674638e-06	0.011294794603600002		0.421522428893	0.0	0.0481695568401	0.0		0.0007367153129612477	2.87571673878582	0.08828316515432	59.91952081266211	0.13955274452226438	0.05947201122692861
17906777	0.00031467328154700003	0.0155316321761		3.49786871477	0.0	0.122257053292	0.0		1.0374201820327924e-05	2.1269280971944498	1.8482488899346	67.1076485625435	0.23759729071326866	0.2153259889387583
17905971	0.0168937916239	0.0		0.0	0.0	0.0045738045738000005	0.0		0.030092818540037036	0.0	0.0	0.105785878743	0.012059471365632568	0.0
17908153	0.0132365468909	0.0058833709918		4.90378972166	0.0	0.000557180665831	0.0		0.0132365468909	0.32310227944963005	0.257539084763	9.55264998797	0.002676126462532663	0.0029065063275650364
17906925	0.014120166941899999	0.199692662878		2.91665218239	0.0	0.212765957447	0.0		0.0015838307839189806	2.8910825740505204	0.11322835340982006	59.528245846100425	0.1672918229557603	0.08254959229838761
17906685	0.004350072540149999	0.005455481084939999		0.185126089269	0.0	0.0158970476911	0.0		0.015932919284240992	0.03143025878674	0.0	2.05943419020195	0.011930849768667432	0.0
17906283	0.006467642041279999	0.0		0.106805935429	0.0	0.0355526826115	0.0		0.02319423259160977	0.000180010003533	0.0	0.15636868973491	0.021346355074977254	0.0
17908433	0.023186311463700003	0.0		0.0	0.0	0.00811144418974	0.0		0.01949732627834395	0.0	0.0	0.0	0.01015381143996858	0.0
17906503	0.0149060441952	0.000391949841287		0.0340125362272	0.0	0.00192233756248	0.0		0.0120989748054	0.012744288727808998	0.0	0.12402071292848996	0.01224864754518814	0.0
17906701	0.05585370760919999	0.0		0.00385739859485	0.0	0.0567200986436	0.0		0.1053962136261543	1.97479082357	0.0	6.90369918253816	0.04549892599102336	0.0
17906679	0.0535292994969	0.0		0.0	0.0	0.00240945711919	0.0		0.06309506029025637	0.0291992657003	0.0	1.0386595942	0.007388285561682795	0.0
17906293	0.032297044862599995	0.0		0.0	0.0	0.000699026954479	0.0		0.03335170781598452	0.000180010003533	0.0	0.049562754305910006	0.0025278404044504553	0.0
17906889	0.021152319247900002	3.5716653655999995e-05		0.0106435627895	0.0	0.00232919254658	0.0		0.018988994602640776	0.0006071831121519999	0.0	0.4377196437559001	0.021844255461058355	0.0
17906011	0.056114024779900004	0.00165489932988		0.00853579654358	0.0	0.0681431005111	0.0		0.011966897280746543	1.48494269797988	0.0	30.825146370843573	0.022873002201208626	0.0
17906341	0.007534574984039998	0.000960053352173		0.0226812604451	0.0	0.0575326215896	0.0		0.04556096881231676	0.0144608036170946	0.0	0.14178787944906002	0.11256518744476046	0.0
17906621	0.00705361451724	0.00605344754877		0.268864981073	0.0	0.008820079756040001	0.0		0.019548910215644567	0.21699330885877	0.0	2.7952098079159997	0.018360621436415918	0.0
17907021	0.00742523335229	0.0		1.07928531908	0.0	0.0	0.0		0.00742523335229	0.00243326518103	0.0	1.990807258495	0.001501426355037602	0.0
17906045	0.0182185821422	0.0783006695565		1.7567928113299998	0.0	0.0142857142857	0.0		0.01431045659400506	1.0985665771292	0.0	12.106904230496	0.024786502811933	0.0
17908157	0.0147504203968	0.0		0.110669326703	0.0	0.0056176571233	0.0		0.017942380576992868	0.0259747777018	0.0	1.9805317566229999	0.006953022273576032	0.0
17908173	0.015651312455	0.021915096411200003	0.0	10.0643931443	0.0	0.0696557245797	0.0	0.0015476512021032453	0.005043926520838313	2.1033453272292	1.8482488899346	36.6035403156735	0.2547066054211603	0.23446669598422984
17905773	0.030627519767299997	0.0		20.0692672381	0.0	0.000984251968504	0.0		0.030627519767299997	0.0	0.0	31.24710142218	0.004747908659281362	0.0
17906387	0.277959028593	3.5716653655999995e-05		0.0025358824095700005	0.0	0.166666666667	0.0		0.049309072891112	0.033108001134685996	0.0	0.18105597647075208	0.11114160263448487	0.0
17906639	0.06950991041730001	0.0		0.0	0.0	0.0	0.0		0.06950991041730001	0.0	0.0	0.017650112975400003	0.00042025635637759885	0.0
17905889	0.154518809432	0.0133807435959		0.0737440981138	0.0	0.142739613328	0.0		0.1384725199129062	0.0197410970540508	0.0	0.5443754099430401	0.07199499165276492	0.0
17906399	0.29145888889000005	6.00033345108e-05		0.000180010003533	0.0	0.333333333333	0.0		0.08102142234908369	0.0145208069516054	0.0	0.141967889452593	0.11263033641561082	0.0
17906297	0.00624426386106	0.00107149960968		0.203727792454	0.0	0.00122671383334	0.0		0.00624426386106	0.0011429329169919998	0.0	0.2202646030967	0.002314614519343841	0.0
17906987	0.07705378352339999	6.75810442772e-05		0.616871578284	0.0	0.00272294077604	0.0		0.05644505470087645	1.8949980216164573	1.54937242984	29.024276619224	0.021601404472902614	0.01795442432299588
17908253	0.0139024936685	1.89110646307	1.54937242984	27.0264123513	0.0	0.0245047988564	0.0	0.024016838171898	0.01431215629685052	21.6477204944222	16.5761563116863	207.23514725444	0.057781004441399275	0.06069615589949925
17906331	0.10676794356699999	0.0008400466831519999		0.00696038680326	0.0	0.143350604491	0.0		0.1064117165861424	0.0010200566866848	0.0	0.42514878426999	0.02411502411510656	0.0
17906673	0.0	0.0		0.036541429908500005	0.0	0.0	0.0		0.0	0.0011322696591379998	0.0	0.37238184342945	0.005746618336128457	0.0
17906531	0.036779900087900004	0.0		0.0	0.0	0.0	0.0		0.036779900087900004	0.0	0.0	0.0	0.0025364203954242053	0.0
17906947	0.0247505125991	0.00786606618203		0.271707036038	0.0	0.0315789473684	0.0		0.012901579005557282	13.361858969792031	11.59584164838	129.145689247178	0.04774982282068463	0.033585340214746864
17907079	0.026645754484700003	0.0		0.0	0.0	0.00506808328754	0.0		0.02670443893897935	0.0	0.0	0.0	0.010102751534382302	0.0
17906009	0.608822331218	0.0		0.0	0.0	0.329949238579	0.0		0.02006660640973853	0.0	0.0	0.13230735259610002	0.05663567202033425	0.0
17906935	0.017246792345599997	0.0008214830340880001		0.034788020660900004	0.0	0.0131304710296	0.0		0.015176850828257475	0.00142866614624	0.0	0.4725076644168	0.020009653780329185	0.0
17907031	0.00139447269405	0.0		0.113176990184	0.0	0.0285343709468	0.0		0.05521099142684166	0.000319709011819	0.0	0.7689001734249999	0.028322731837985424	0.0
17908245	0.059520724093199986	0.145130647521	0.070071670023	5.7443156329799985	0.0	0.08254380272549999	0.0	0.03797292822478522	0.08192165571483415	2.1794999814346	1.8885771391534	32.232746415411995	0.19873802505502888	0.17495572433945064
17907061	0.062385493318999986	0.0		0.786484169075	0.0	0.0177521613833	0.0		0.04796900768351455	0.000319709011819	0.0	1.5553843424999998	0.02264209385165146	0.0
17905869	0.000142595644488	0.000391949841287		0.236519954226	0.0	0.00182726276038	0.0		0.00683417942157049	4.382074099646977	0.0	13.757784567573	0.008937479215154462	0.0
17906655	0.0178611842772	0.0		0.0	0.0	0.000912408759124	0.0		0.022678132947533614	0.0	0.0	0.110669326703	0.003864596006582026	0.0
17906743	0.00197463276841	0.0		2.47967084404	0.0	0.0	0.0		0.00197463276841	8.782968278977	2.77383399755	156.01152796680003	0.00665788196130786	0.0015124688118198673
17907011	0.0007243324168200001	0.00121413287707		0.00741875055246	0.0	0.00185873605948	0.0		0.013818796389046695	0.0015182475763172007	0.0	1.7886037969454598	0.01771561771563427	0.0
17906689	0.0222351067638	0.012356784842299998		0.810934069006	0.0	0.0677896466721	0.0		0.01391883214075103	1.9871476084123	0.0	3.670698987496	0.04064922831676019	0.0
24604447	0.05228201707280001	0.0		0.0	0.0	0.0	0.0		0.05228201707280001	0.0	0.0	0.0	0.00042060988433205806	0.0
17907009	0.0325031167616	0.0		0.140038650949	0.0	0.035935198821800005	0.0		0.01708183695670056	0.0041280922014272	0.0	3.1621777360329997	0.022735191637641497	0.0
17906693	0.0980410292753	0.0		0.006590412973310001	0.0	0.0228136882129	0.0		0.030749450149818336	1.97479082357	0.0	2.86635533146331	0.034700178284099006	0.0
17906723	0.024160274830299998	0.0		0.0552169735602	0.0	0.00831225153596	0.0		0.020543728402134698	0.79436035529917	0.0	7.452804883975539	0.032624906786002536	0.0
17905849	0.411488891381	0.00012000666902200002		0.00126007002473	0.0	0.0888888888889	0.0		0.11331443082390096	0.0001800100035328	0.0	0.41818839746673	0.001729355814963142	0.0
17907065	0.0	0.0		0.0	0.0	0.0393013100437	0.0		0.004270059439527236	7.35286105392	0.0	26.000000617199998	0.028576871785112437	0.0
17906147	0.019235322262	7.143330731199999e-05		0.0165368106427	0.0	0.00165425971878	0.0		0.02426774221226987	7.143330731199999e-05	0.0	0.0165368106427	0.0888145543915448	0.0
17906609	0.0329150216213	0.0		0.0	0.0	0.000925517849273	0.0		0.0414514906522437	0.0	0.0	0.0	0.000919244381118779	0.0
17906291	0.19971993311099998	0.0		0.0	0.0	0.14005076702400002	0.0		0.15688297727542178	0.7466658790360301	0.0	5.805882447201049	0.11627103019163815	0.0
17906123	0.0387070012304	0.0		0.0	0.0	0.00235983399788	0.0		0.048663495888373855	0.0	0.0	0.006720373465210001	0.0038831783325123507	0.0
17908135	0.013388118160299998	0.106724923833		0.603323057541	0.0	0.0114868461603	0.0		0.013388118160299998	0.106724923833	0.0	0.603323057541	0.015337074391425284	0.0
17906507	0.004258321747520001	0.000348399858922		0.00239524903009	0.0	0.0761904761905	0.0		0.014695376990186547	0.012352338886522	0.0	0.09000817670129	0.015981100611478286	0.0
17906671	0.0320596286031	0.0		0.017650112975400003	0.0	0.000504477235465	0.0		0.03831183471812037	0.0	0.0	0.12831943967839998	0.004674744749631053	0.0
17908131	0.00022333848978799996	0.000514668026881		0.13576942549100002	0.0	0.00167757087737	0.0		0.00016779943756317972	0.0011322696591379998	0.0	0.3358404135209501	0.006295704392459584	0.0
17906351	0.085006573501	0.00324018006359		0.019381077047	0.0	0.0985507246377	0.0		0.05784571246271044	0.0151208402967284	0.0	0.13272737593790304	0.09061886051085097	0.0
17906027	0.06338007873359999	0.0		0.0	0.0	0.0138248847926	0.0		0.04500373624292185	0.000318951468216	0.0	0.000956854404649	0.0933231276495842	0.0
17908133	0.0026623869254299997	0.0030880081612800004		0.282810080771	0.0	0.0054204862495	0.0		0.0026623869254299997	0.003705609793537	0.0	0.4828810688009501	0.006903389270365839	0.0
17907099	0.028114212322999998	0.0		0.0	0.0	0.0	0.0		0.028114212322999998	0.0	0.0	0.0	0.0041096913995306355	0.0
17906165	0.016500387362799997	0.0		0.117507790528	0.0	0.000118217283367	0.0		0.016500387362799997	0.0	0.0	0.117507790528	0.08176973290054129	0.0
17907069	0.016695809474799997	0.0		0.0	0.0	0.0320097244733	0.0		0.007047373226290054	7.35286105392	0.0	26.000000617199998	0.02873163522560682	0.0
17908195	0.0008422331295680003	0.0		0.190565774552	0.0	0.0	0.0		0.0008422331295680003	0.013463395167486002	0.0	1.007948164712	0.01297344362212082	0.0
17906101	0.0476908829034	0.0		0.0	0.0	0.0208354003373	0.0		0.03852983098250375	0.0	0.0	0.0	0.00880762746350673	0.0
17906163	0.048206850287300006	0.00314306552173		0.347844489956	0.0	0.00861453311909	0.0		0.048206850287300006	0.036251066656416	0.0	0.528900466426752	0.022957616707622662	0.0
17906041	0.0569447396942	0.0		0.006720373465210001	0.0	0.00519891500904	0.0		0.04148900781490628	0.000318951468216	0.0	0.007677227869859002	0.07425111536012538	0.0
17905933	0.197007048708	0.0		0.00264014671848	0.0	0.0	0.0		0.05566602019515754	0.0150608369622176	0.0	0.128587145856663	0.09197547320719036	0.0
17905769	0.0496377778737	0.0107502577594		5.27884396235	0.0	0.0016630513376700005	0.0		0.0496377778737	0.0383270059247	0.0	8.638533213403553	0.038132137031117966	0.0
17906793	0.0	0.0		2.80355196548	0.0	0.0	0.0		0.0	2.1033453272292	1.8482488899346	39.407092281153496	0.2444582427814265	0.22503270536033784
17905871	0.027951149326	0.0		0.445750947227	0.0	0.0	0.0		0.005274430689549061	4.38168214980569	0.0	13.521264613347	0.012620685303199113	0.0
17906617	0.166130639444	0.0		0.0	0.0	0.0	0.0		0.166130639444	0.0	0.0	0.0	0.0022047678103873773	0.0
17906383	0.153421676985	0.0		0.0	0.0	0.103626943005	0.0		0.05283225063832101	0.7466658790360301	0.0	5.805882447201049	0.0635781172991805	0.0
17907055	0.00450565602106	0.0		0.0	0.0	0.00518009878328	0.0		0.0035713001530563405	7.35286105392	0.0	26.000000617199998	0.02194763969007844	0.0
17907093	0.0	0.0		0.0	0.0	0.00892060660125	0.0		0.0020107627344665194	0.0	0.0	0.0	0.025829175227475628	0.0
17906633	0.00846914994315	0.007490596966819999		0.276585938002	0.0	0.013728801115899998	0.0		0.00729654498589463	0.019847381809119997	0.0	3.228281632761	0.032712550607276535	0.0
17907035	0.00845637972996	0.0		0.0	0.0	0.0101809954751	0.0		0.01224932166033442	0.00023653365497	0.0	1.164313468109	0.024526140387430742	0.0
17906059	0.0521022873496	0.0		0.0	0.0	0.00228168429786	0.0		0.04335167283570087	0.0	0.0	0.0	0.009024095264677364	0.0
17908469	0.040138785003699995	0.0		0.0	0.0	0.000588928150766	0.0		0.07180918077932155	0.0	0.0	0.0	0.0033153027394869435	0.0
17906589	0.009200164423	71.1222377205		294.37927273099996	0.0	0.076502216772	0.0		0.010606061165662432	72.40865584547629	0.0	310.8674031610262	0.07762142532909623	0.0
17905847	0.0	0.000522599788383		0.0145892440923	0.0	0.00782661047562	0.0		0.013161642442177443	0.006880897213703399	0.0	0.12947409757177	0.014901960784323222	0.0
17907043	0.022845910924499998	0.0		0.0	0.0	0.00307079154552	0.0		0.022845910924499998	7.35286105392	0.0	26.000000617199998	0.01167420625820987	0.0
17906077	0.307712622436	0.00031047599623		0.00313209163505	0.0	0.230329041488	0.0		0.30454728550811266	0.7466658790360301	0.0	5.805882447201049	0.061804853387282616	0.0
17906309	0.0359035088995	0.00233701255638		0.239777488285	0.0	0.0605095541401	0.0		0.04179355593349325	1.98290771595638	0.0	3.1148473344465533	0.11427822554228005	0.0
17906707	0.005439875602479999	0.0		0.244332397648	0.0	0.00144560896278	0.0		0.005439875602479999	0.0259747777018	0.0	2.114194827568	0.008718493265523005	0.0
17906247	0.0560043620182	0.00744041347934		0.0339618873331	0.0	0.0984251968504	0.0		0.06833465099968103	0.0243013504768654	0.0	0.183310186930523	0.11182978723413596	0.0
17906945	0.00172439708105	6.0341628628100015	5.91340622644	10.9462531199	0.0	0.0643500643501	0.0	0.04155024207239177	0.034622381815536465	19.7566140313522	15.0267838818463	180.20873490314	0.08170606372046864	0.08706799834731357
17906965	0.00208557825724	0.00027107507048600003		0.152253831257	0.0	0.00129982668977	0.0		0.0013291906307841847	0.239028413270586	0.0100458461093	7.879949428239999	0.05200892857145599	0.009433860722522116
17908199	0.0166949483306	0.00164296606818		0.0631827603174	0.0	0.00577256944444	0.0		0.0166949483306	0.00217871587302	0.0	0.18751243169339998	0.003263346916220943	0.0
17907089	0.015297547098700001	0.0		0.0	0.0	0.0109463766108	0.0		0.011405242179714949	7.35286105392	0.0	26.000000617199998	0.023174795516522368	0.0
17906075	0.09778656855560001	0.00246609118767		0.00493218237534	0.0	0.120512820513	0.0		0.033678001718893215	1.10103266831687	0.0	12.11183641287134	0.029704274517579593	0.0
17905985	0.38838955516900003	0.00287056321395		0.0133959616651	0.0	0.294117647059	0.0		0.06260616744052605	0.5061235437463301	0.0	8.930148342679098	0.09307415036050276	0.0
17906583	0.00470662247531	0.00108874955913		0.08731771464230001	0.0	0.00518890870764	0.0		0.005717772004511759	0.008579346525949999	0.0	2.0092306919443	0.013040671400887731	0.0
17905781	0.0396298617466	0.0177612954285		1.6335717769100002	0.0	0.0143412736996	0.0		0.041975152945489314	2.00066901138488	0.0	4.7484191113565535	0.09305806451617496	0.0
17907059	0.0020629179084900003	0.00351679913001		2.98927926051	0.0	0.00137509549274	0.0		0.00380488983755066	0.003836508141829001	0.0	3.7581794339349996	0.0130170668209506	0.0
17908181	0.116242430848	0.00243326518103		0.911521939415	0.0	0.00596540067608	0.0		0.03481333636044402	2.1819332466156296	1.8885771391534	33.144268354827	0.16248457424908544	0.14205297808078055
17906561	0.020323260088799998	0.00239524903009		0.222540409886	0.0	0.007416625186659999	0.0		0.02622374284036624	0.06624171062145001	0.0	9.021018173138998	0.012069328468164824	0.0
17906645	0.067288736792	0.21093986131		2.03091024039	0.0	0.013157894736799998	0.0		0.033708171505295245	0.2232966461523	0.0	3.3372788958490003	0.038738697388337816	0.0
17907063	0.00110398522595	0.0		0.0	0.0	0.0363771343727	0.0		0.00686169473198885	7.35286105392	0.0	26.000000617199998	0.028337715454289907	0.0
17906575	0.00972407135169	0.000391949841287		0.0425918827532	0.0	0.00412392936449	0.0		0.008961313457009281	0.004572748148344	0.0	0.39380988047885	0.007468330497255381	0.0
17906683	0.000287713832947	0.000617601632257		0.195625317017	0.0	0.0047825096788900005	0.0		0.001684547609155526	0.026592379334057	0.0	2.06993341794995	0.008235570943556465	0.0
17906915	0.00900390817862	19.6849110124	3.83697975957	197.155139515	0.0	0.100601153233	0.0	0.045197517077089834	0.0028077146289783106	30.106365814512202	15.0649298344743	273.158092882098	0.0990942127245449	0.07633207484882062
17907109	0.0156754408932	0.0		0.0	0.0	0.00295906625021	0.0		0.051547065964352566	0.0	0.0	1.243348346965	0.01285407437240868	0.0
17908897	0.011687697426799998	0.0		0.0	0.0	0.00310416187629	0.0		0.011687697426799998	0.0	0.0	0.0	0.006663040522164857	0.0
17906161	0.052678424135499995	0.0		0.0	0.0	0.0	0.0		0.052678424135499995	0.0	0.0	0.0	0.0013325469122023696	0.0
17906951	0.00020508791170900005	0.0018975254934		0.24360613001	0.0	0.00700700700701	0.0		0.000950232717503158	0.2387573382001	0.0100458461093	7.7276955969830015	0.06960312687917265	0.012707064352645549
17907091	0.00946613116535	0.0		1.31911938277	0.0	0.0	0.0		0.00946613116535	0.00351679913001	0.0	4.30839864328	0.0011138154366548366	0.0
17906869	0.0394514177028	0.0108767050988	0.0104608404654	0.0108767050988	0.0	1.0	0.0	0.9640850325142692	0.06301184871810968	6.322917249067099	3.4514166608902	96.49274967213007	0.08396553076567179	0.06983478232195431
17908169	0.0	0.0		0.6853830506440001	0.0	0.0	0.0		0.0	2.1033453272292	1.8482488899346	40.0924753317975	0.19904949694094112	0.1832323029388868
17908145	0.004407327055569999	0.0291992657003		1.0386595942	0.0	0.0106263160472	0.0		0.02376489978102557	8.5775112524903	3.4604655523907004	57.232785721259994	0.03453956876120461	0.027525126843865863
17906301	0.00225326644449	0.00747844018042		0.921717752237	0.0	0.034639175257699995	0.0		0.042568725876417066	0.0275767481653	0.0	3.3596892510535534	0.07047582403511855	0.0
17905895	0.029662115949400002	6.00033345108e-05		0.006780376799720001	0.0	0.0669456066946	0.0		0.06456551282575185	0.0196210903850288	0.0	0.13296738927603	0.13279413147749336	0.0
17908473	0.11587817700200001	0.0		0.0	0.0	0.0	0.0		0.1417829521745955	0.0	0.0	0.0	0.0005171967933802265	0.0
17906831	0.0291720433918	1.94356429259	1.94353586022	2.10513606254	0.0	0.3518850987430001	0.0	0.35024933597030194	0.07573968671355223	17.16733371385894	7.8914479894569824	46.439354498646935	0.3082305417299008	0.2533908791037261
17906801	0.0109399401485	0.143924581003		4.35753711482	0.0	0.0238555770471	0.0		0.0040494151835874966	34.22366356477701	37.329771492649996	244.93646435636	0.03240332843857033	0.02737056386072046
17906339	0.05740833259080001	0.0		0.030061670589900006	0.0	0.0989115002366	0.0		0.06848067796347783	0.0183610203603008	0.0	0.15468859636892002	0.12465703310766928	0.0
17906557	0.0322061701243	0.0		0.0	0.0	0.0107385079126	0.0		0.03376856808011176	0.0	0.0	0.0	0.0027859132795230077	0.0
17906697	0.00175279775712	0.000534357808647		0.335220465291	0.0	0.000446428571429	0.0		0.00175279775712	1.975325181378647	0.0	3.20157579675431	0.026954268600445124	0.0
17906573	0.00794989991102	0.0		0.0	0.0	0.00014021312394799998	0.0		0.00794989991102	0.004572748148344	0.0	0.39380988047885	0.0064112935846587435	0.0
17906811	0.0	0.0		1.45688737254	0.0	0.0	0.0		0.0	34.01214361191401	37.608180578818	214.17094708441792	0.04498525073745442	0.04318476676503969
17906229	0.0706491483606	0.0		0.608558069682	0.0	0.0253993191935	0.0		0.06353360294221339	0.0	0.0	0.907228274388	0.06314691796689363	0.0
17906157	0.000857862618608	3.5716653655999995e-05		0.00150009945355	0.0	0.00326492537313	0.0		0.0069765848296669715	0.00014286661462399998	0.0	0.02325154153002	0.005095962938460888	0.0
17908217	0.0006253513368230001	0.000319709011819		0.118292334373	0.0	0.054037766171199986	0.0		0.04418354463620357	0.004143686513999	0.0	2.0367158728809995	0.02738589211620171	0.0
17906827	0.0183606952396	0.00393303309102	0.0	0.121596273064	0.0	0.046719048630300006	0.0	0.0002521668582350307	0.008351496441374371	19.68884404549102	3.83697975957	197.276735788064	0.08087091757404866	0.028739690157915082
17906897	0.014060694101	25.4406952858	34.555937495100004	91.4046072336	0.0	0.248152059134	0.0	0.2722091045825014	0.005195218443607829	89.057987392254	94.998812284068	288.073948642554	0.14431974798215094	0.1443718370915044
17906559	0.0818461689238	0.0		0.0	0.0	0.0	0.0		0.0818461689238	0.0	0.0	0.0	0.0007640531198837317	0.0
17906879	0.0594324296669	2.62476011289	0.0645563704893	52.4213345325	0.0	0.131677086761	0.0	0.05448216077692488	0.07066657414858102	6.3120405439682985	3.4409558204248	96.48187296703131	0.08180480517581669	0.06772544095520433
17906273	0.0306864915069	1.4832877986500002		30.816610574299997	0.0	0.017142857142900002	0.0		0.02026792216349532	2.7568138749792004	0.0	70.484085437471	0.01992860468727353	0.0
17908165	0.00123370728572	0.8086048697730001	0.525261674193	40.300368551300004	0.0	0.0272696107458	0.0	0.006723344903785147	0.001451435607001347	20.493515882173	4.362241433763	237.4555080663	0.042124360057723235	0.014517046812046156
17906591	0.06299716391730001	0.004763639532029999		0.004763639532029999	0.0	0.17431192660599998	0.0		0.018526139152582097	1.2810130338777668	0.0	9.008436805836169	0.04872998343456001	0.0
17906929	0.0364485611529	0.00032144988290400004		0.211871189487	0.0	0.0008391608391610001	0.0		0.0364485611529	0.0006786164194639999	0.0	0.6316253564539	0.004197915192676428	0.0
17906087	0.00678105603581	0.0		0.0	0.0	0.000404258186228	0.0		0.00678105603581	0.035394263570199994	0.0	3.3737160548400005	0.11824905800829648	0.0
17906285	0.0348505061738	0.0		0.0	0.0	0.00372836218375	0.0		0.032796219269897946	0.000180010003533	0.0	0.14964831626970002	0.011312844856807542	0.0
17905831	0.07799271899600001	0.0		0.0	0.0	0.000242336120199	0.0		0.07799271899600001	0.0	0.0	0.0	0.0022796352583586057	0.0
17906635	0.015137199643700004	0.00531309784856		1.94542995052	0.0	0.031382079459000005	0.0		0.020334278414575947	0.01766988269086	0.0	4.897125645279	0.04191930533722453	0.0
17906913	0.0357774440356	0.94244945675	0.0529987098707	4.67492060846	0.0	0.0443365188783	0.0	0.03926161953545043	0.033910948468333965	74.55994981040999	71.42193909662869	274.363753225918	0.10243966421840787	0.10207824015749087
17906903	0.782246087281	0.3588883513	0.120251991728	0.6372974374679999	0.0	0.41935483871	0.0	0.2292983194170215	0.08062331117141404	66.01163782361999	67.96147354423799	218.169627098858	0.13150315583088926	0.13240172028303024
17907119	0.009355270304920001	0.0		0.0	0.0	0.0105816244618	0.0		0.012871505396159043	0.0	0.0	0.0	0.012789522260810078	0.0
17906629	0.00175849978894	0.0012866700672		0.22496139455	0.0	0.00172542704319	0.0		0.00175849978894	0.006742151152139999	0.0	0.410087483819	0.00748053012704715	0.0
17906047	0.0318052261295	0.0		0.107045948767	0.0	0.039101497504199986	0.0		0.031211428241819224	0.000180010003533	0.0	0.2566942650367	0.03433495964617618	0.0
17905807	0.0383314068348	0.0		0.643613258027	0.0	0.0	0.0		0.0383314068348	0.0	0.0	1.252171327709	0.01980703456020757	0.0
17906593	0.0184441203217	0.0107181889471		9.425123574710002	0.0	0.0740370185093	0.0		0.017921883144185902	1.2864181249763071	0.0	16.488130430026168	0.0793108358251488	0.0
17906257	0.0653973210342	0.0		0.105785878743	0.0	0.0165352327652	0.0		0.06063250540117776	0.0	0.0	0.2380932313391	0.040612213971842816	0.0
17906121	0.0552461755334	0.0		0.0	0.0	0.00977318827217	0.0		0.06017183303075563	0.0	0.0	0.0	0.016965552831868444	0.0
17906505	0.0158507901614	0.000261299894191		0.133567795914	0.0	0.000638841567291	0.0		0.0158507901614	0.012613638780713005	0.0	0.22357597261529005	0.00992263706695226	0.0
17906381	0.00406773244832	0.00104519957677		0.0367561851162	0.0	0.0167858253031	0.0		0.007015265706847036	1.48598789755665	0.0	30.86190255595977	0.021440070247365845	0.0
17905989	0.113786351683	0.0		0.0	0.0	0.0029411764705900003	0.0		0.03417466892206144	0.0	0.0	0.0	0.007129955318951019	0.0
17907005	0.006283829308100001	0.0		0.379820937698	0.0	0.0	0.0		0.006283829308100002	0.000386943574995	0.0	1.061474327696	0.00021772262138066285	0.0
17906845	0.0	0.00338528200518	0.00338528200518	0.00338528200518	0.0	1.0	0.0	1.000000000003763	0.04647183495042199	2.9715478016348	0.4120186879734001	68.9469199560326	0.1693268237724723	0.10192762691891424
17906019	0.025264313306900002	0.0		0.025261403829099995	0.0	0.0724593183912	0.0		0.030985800503358606	0.0	0.0	0.13230735259610002	0.05082550987378658	0.0
17906539	0.00041270438522000017	0.0100006398388		0.0417112462583	0.0	0.0167947310648	0.0		0.0025096293385684872	71.13286879593082	0.0	294.4235440729415	0.049139570028778126	0.0
17906547	0.042171625565300006	0.00091454962967		0.402184087143	0.0	0.006880149494609999	0.0		0.042171625565300006	0.00696799717844	0.0	0.671049068216	0.008129835589943065	0.0
17906003	0.008323157361009999	0.000479049806017		0.145587591047	0.0	0.004	0.0		0.008323157361009999	1.486466947362667	0.0	31.00749014700677	0.015394912985298412	0.0
17908235	0.0102886419295	7.58161604608e-05		1.50465866337	0.0	0.006040015100040001	0.0		0.0033343459660320433	33.61449216212046	37.329771492649996	238.88746155857	0.02700548964051238	0.024755649888193686
17906159	0.0	0.0		0.000250016575592	0.0	0.000497017892644	0.0		0.0570961701369759	0.00014286661462399998	0.0	0.023501558105612	0.002001334222815939	0.0
17908127	0.0253371571673	0.0038759484305		0.34577424993	0.0	0.00784080969636	0.0		0.0275857788810245	0.2148158097405	0.0	2.8721190767729996	0.0156342604892565	0.0
17905843	0.00106913742424	0.0006532497354780001		0.10181985877	0.0	0.00421348314607	0.0		0.017703606300700378	0.0029178488184714003	0.0	0.14737314032397	0.00644507205445861	0.0
17906805	0.000146888723897	0.00490280915983		2.60927503486	0.0	0.00092187139894	0.0		0.006139739523769775	66.32885673207782	68.219012629001	222.818487365168	0.08247269485118612	0.08373828518617284
17906095	0.04123341908769999	0.0		0.0	0.0	0.004836182821329999	0.0		0.0432758456178602	0.0	0.0	0.0	0.0036491188368042	0.0
17906599	0.039546325766099996	1.2693694139899998		7.04423465999	0.0	0.07260524710189999	0.0		0.024565596749138472	1.2762493943457371	0.0	9.00367316630414	0.04777800959731912	0.0
17906385	0.43977711805200004	0.0		0.000964349648712	0.0	0.0	0.0		0.05073031907357143	0.033072284481029994	0.0	0.17741287779784198	0.11451075431688362	0.0
17906819	0.21842128153299997	0.0287673831917	0.0145806351502	0.032422875228800004	0.0	0.793103448276	0.0	0.4814720371356164	0.015746307362413055	2.081430230818	1.8482488899346	26.539147171373497	0.2709740990987352	0.2549421947829965
17906661	0.0167637438991	0.0		0.0	0.0	0.00218858289258	0.0		0.0167637438991	0.03420485410607	0.0	1.0661903304317002	0.008855525906807058	0.0
17905911	0.200298932163	6.00033345108e-05		0.00852047350054	0.0	0.122292993631	0.0		0.07394827921902072	0.0184210236948116	0.0	0.16320906986946002	0.12449867736151472	0.0
17906949	0.0407128593325	1.22676069125		2.7701877192400004	0.0	0.0431260424112	0.0	3.4816951262138755e-05	0.021702334786489884	20.9833747226022	15.0267838818463	182.97892262238	0.07261911442842077	0.06656862900452061
17906749	0.0303346164201	0.0		0.0	0.0	0.0	0.0		0.0303346164201	0.0	0.0	0.00385739859485	0.005021645021641	0.0
17906103	0.0735942115322	0.0		0.0	0.0	0.0131445904954	0.0		0.02503960426390913	0.0	0.0	0.0	0.0041877370417139105	0.0
17907023	0.019265213710900002	0.0		0.0	0.0	0.0457186158121	0.0		0.01233564486734931	0.00030411469924720004	0.0	1.781185046393	0.029630174251916438	0.0
17908461	0.0312771766837	0.0		0.0	0.0	0.00141173148867	0.0		0.034984097872949024	0.0	0.0	0.0	0.009785596481583156	0.0
17906031	0.191949654284	0.0		0.0	0.0	0.0412186379928	0.0		0.04432923246746901	0.000318951468216	0.0	0.000956854404649	0.09166571656598567	0.0
17908233	0.0	0.465322637814		3.19612434634	0.0	0.263157894737	0.0		0.0040379676477315	34.079738983774	37.329771492649996	240.57892724154	0.033933518005533694	0.03227034970420816
17905979	0.051046035738800004	0.00468026009185		0.453325192229	0.0	0.00638768323643	0.0		0.051046035738800004	0.0214811937548776	0.0	0.566311471112863	0.03272747240681252	0.0
17906131	0.09150104589369999	0.0		0.0	0.0	0.0157556895546	0.0		0.09964912629320244	0.0	0.0	0.0	0.02323539344814922	0.0
17908183	0.00487804572525	0.0		0.0	0.0	0.0018333206019400005	0.0		0.00487804572525	0.00393303309102	0.0	0.121596273064	0.014743096050175656	6.532367341999996e-05
17905861	0.0762885177473	0.000420023341576		0.00138007669375	0.0	0.12	0.0		0.10634216102569392	0.0014400800282608	0.0	0.42652886096374	0.024765003615410883	0.0
17906115	0.027275154741099997	0.0		0.0	0.0	0.000238578074675	0.0		0.027275154741099997	0.0	0.0	0.0	0.002782001099857277	0.0
17906553	0.022870723705299998	0.0		0.06854767224290001	0.0	0.0	0.0		0.022870723705299998	0.008579346525949999	0.0	0.4324513248872001	0.009057071960284937	0.0
17908185	0.011115851739499999	6.09306934955	5.68243542194	115.15754137200001	0.0	0.0551694178975	0.0	0.07529988173530994	0.007674239023284501	16.5145241516622	16.910385496844302	191.16049473909803	0.0846877098724205	0.09305642429830176
17906721	0.085843719892	0.0		0.05236061425969999	0.0	0.0393797184248	0.0		0.054142768154039414	0.0	0.0	4.14208362829486	0.03356445004727647	0.0
17908201	0.0166479985716	7.35286105392		26.000000617199998	0.0	0.0264816420931	0.0		0.017217041956254026	7.353097587574968	0.0	27.164314085308995	0.02912291433039308	0.0
17906739	0.0310145943868	0.005521697356020001		0.0639448177681	0.0	0.0194774346793	0.0		0.019798499798008608	0.40659041893402	0.0	2.1743161773583	0.011344861768909444	0.0
17905883	0.049445762270400005	0.0		0.0	0.0	0.00352650758199	0.0		0.06350292419500482	0.0	0.0	0.0	0.006435006435007863	0.0
17906493	0.0459216177181	0.0		0.0978568103747	0.0	0.0	0.0		0.0459216177181	0.00239524903009	0.0	0.3203972202607	0.00600177233545474	0.0
17906151	0.0661415850037	0.0		0.0	0.0	0.000214270409256	0.0		0.06157024522685658	0.0	0.0	0.0	0.0015811711034471574	0.0
17908249	0.291129338118	0.0258723552251	0.0100458461093	4.14591485569	0.0	0.3971774193550001	0.0	0.1704181291810447	0.017612242797055613	6.352009712382518	3.46468261508982	100.64188463591043	0.08606342805580716	0.07076353757563691
17905791	0.0363295735311	0.0		8.357193271860003	0.0	0.000946252838759	0.0		0.03209554023543093	0.0	0.0	11.223169715722237	0.010816379088334212	0.0
17908243	0.00571166255209	8.17372106016	2.77383399755	120.84119832200001	0.0	0.0185375901133	0.0	0.007486538893797002	0.0028763655900298428	97.231708452414	97.77264628161801	408.91514696455397	0.12413223140518327	0.12240231237250045
17905959	0.027814713062400003	0.0		0.0	0.0	0.00792998120301	0.0		0.055472103350793785	0.0	0.0	0.0	0.007487783090750191	0.0
17905965	0.0027362128521300003	0.0		0.0	0.0	0.016693163751999997	0.0		0.013958683829752558	0.0	0.0	0.105785878743	0.014756554307109319	0.0
17906079	0.103404511636	0.0		0.0	0.0	0.636363636364	0.0		0.05285564698230783	0.7466658790360301	0.0	5.805882447201049	0.06260254953933915	0.0
17905999	0.0380496200774	0.0		0.0	0.0	0.0008773029201649999	0.0		0.03388483598817305	0.0	0.0	0.0	0.005252503146024049	0.0
17906725	0.497593461264	0.0		0.0	0.0	0.0909090909091	0.0		0.016254530241201742	0.08076676074417	0.0	1.81694196726554	0.027598355842654042	0.0
17906863	0.0	0.0		69.2175316957	0.0	0.0	0.0		0.0	89.057987392254	94.998812284068	365.540130149564	0.1151308900525672	0.11517244407137445
17906519	0.00619960158601	0.0020032991888		0.0459016814129	0.0	0.013328182345	0.0		0.03827569300417112	0.0120039390276	0.0	0.08761292767119999	0.015538601525890181	0.0
17905897	0.109267458261	0.0		0.0	0.0	0.006009615384619999	0.0		0.08534597737136153	0.0	0.0	0.0	0.007758989726030067	0.0
17906091	0.09022582823599999	0.0		0.00642899765808	0.0	0.0956749672346	0.0		0.05200869151199392	0.7466658790360301	0.0	5.81231144485913	0.06633629913280199	0.0
17906253	0.013792082560299998	0.0		0.0	0.0	0.0223245924876	0.0		0.04005629672929933	0.0	0.0	0.0	0.005532053368047353	0.0
17907045	0.017079807043299998	0.0		0.0	0.0	0.0248514316586	0.0		0.024223515262534284	0.0	0.0	0.140038650949	0.0256769608088607	0.0
17906579	0.0188920124009	8.70999647304e-05		0.00679379724897	0.0	0.0021528525296	0.0		0.0018023948506594887	0.16274381446414038	0.0	15.258216010355769	0.026613750437734868	0.0
17907013	0.0148920825234	0.00053574980484		0.124329671376	0.0	0.00160568872577	0.0		0.015609294143641175	0.00196441595108	0.0	0.5968373357928001	0.00887886933148142	0.0
17906691	0.005697876126090001	1.97479082357		2.8597649184900003	0.0	0.0692023243529	0.0		0.015664317196711217	1.97479082357	0.0	2.8597649184900003	0.0348376880443139	0.0
17908215	0.0923090757185	0.0		0.0	0.0	0.0574241181296	0.0		0.016452210488003008	0.00145066653204	0.0	1.17173221866146	0.023296354992091338	0.0
17906737	0.0691573483642	0.401068721578		2.05515438603	0.0	0.00884109916368	0.0		0.056392563448074876	0.48183548232217	0.0	3.872096353295541	0.019152141166356808	0.0
17905925	0.061113054699300014	0.000960053352173		0.00378021007418	0.0	0.0723981900452	0.0		0.057896732220661835	0.0118806602331384	0.0	0.11334629889090304	0.08946405964275578	0.0
17906709	0.11784323109200001	0.0		0.045788749987000006	0.0	0.0495662949195	0.0		0.05443895192650332	1.97479082357	0.0	6.9494879325251615	0.046473645137357626	0.0
17906281	0.0674259120825	0.000180010003533		0.0428423808407	0.0	0.016921837228	0.0		0.03560914182260424	0.000180010003533	0.0	0.049562754305910006	0.012665985699672151	0.0
17906271	0.0319133829597	0.0		0.0	0.0	0.00492406264832	0.0		0.029314627510614377	0.0	0.0	0.0	0.0037780401416784093	0.0
17906751	0.013912616341799999	0.0259747777018		1.86986242992	0.0	0.00829958170108	0.0		0.02180299925740507	2.6046105692558	2.8072544973136	32.59421867535349	0.13417786969993278	0.12158060887565646
17907103	0.0268827791334	0.0		0.0	0.0	0.0141028020041	0.0		0.020153932070495168	0.0	0.0	0.0	0.007304971055781376	0.0
17907097	0.0137346311399	0.0		0.0	0.0	0.0	0.0		0.040586030782435764	0.0	0.0	0.0	0.015897663413191473	0.0
17906769	0.0125368825523	0.0		0.0	0.0	0.0298953662182	0.0		0.005207607089114327	0.0	0.0	0.10200676284155	0.04123622589531281	0.0
17906245	0.086103774177	0.0		0.0	0.0	0.000455403031683	0.0		0.086103774177	0.0	0.0	0.0	0.004383392498843699	0.0
17906571	0.0	0.000304849876557		0.00544374779565	0.0	0.0308422301305	0.0		0.008928208036207023	0.004180798307057	0.0	0.35121799772565	0.00843098462942894	0.0
17906847	0.37469528826	0.006562358621520001	0.00653203215734	0.00718133215378	0.0	0.593023255814	0.0	0.5726214886795706	0.3459290339033021	17.17389607248046	7.8979800216143214	46.44653583080073	0.30998637895201225	0.2553590368514875
17906713	0.019008389626400002	0.0		0.0	0.0	0.00355101333795	0.0		0.015580586085767963	1.97479082357	0.0	6.90369918253816	0.023269689737471632	0.0
17906825	0.0571492844921	14.3864840072	5.11198839534	38.7431805853	0.0	0.275879439174	0.0	0.2053402633136336	0.07254654502991173	16.439146854826298	6.945656650124401	65.24990488144472	0.2703087703086288	0.2309314366066389
17908239	0.00030650664638999997	0.0		25.1369973396	0.0	0.0	0.0		0.0022691146488871892	34.01214361191401	37.608180578818	237.780530161154	0.035215333102406286	0.03380587907481459
17906893	0.386264346615	0.397727265954	0.278409086168	0.397727265954	0.0	1.0	0.0	0.8251505518568529	0.0518525864884776	63.617292106454	60.44287478896799	196.669341408954	0.1374387683697786	0.1359000461668036
17906891	0.0184126658389	0.00032144988290400004		0.051039098074400005	0.0	0.00248756218905	0.0		0.0674429017377026	0.000928632995056	0.0	0.4887587418303	0.01802525320126176	0.0
17908229	0.312246069927	0.0934752842295		0.199707037129	0.0	0.109090909091	0.0		0.02981664560188882	0.8918848390380999	0.0	98.39289611871901	0.03235129591646862	0.0
17906135	0.0710102639224	0.0		0.0	0.0	0.00246078129806	0.0		0.08518579969868086	0.0	0.0	0.0	0.01986289330285883	0.0
17906997	0.050108884202699995	0.00023653365497		1.02427481716	0.0	0.0200920887401	0.0		0.03687450092233362	1.8952345552714271	1.54937242984	30.048551436384002	0.021198053582398062	0.013156267859252141
17906703	0.011916426436700002	0.0		0.0	0.0	0.415384615385	0.0		0.01474517718934813	0.0259747777018	0.0	1.86986242992	0.010048922385296238	0.0
17906789	0.0003471674339700001	0.0		1.22131892173	0.0	0.0011350737798	0.0		0.0003471674339700001	8.173796876320461	2.77383399755	148.70417324669995	0.004662710427520618	0.0013205939080556295
17905885	0.06951250712460001	0.0		0.0	0.0	0.00159108989658	0.0		0.06050237945103234	0.0	0.0	0.0	0.007027638901992836	0.0
17906343	0.194206465251	0.00234013004592		0.00738041014483	0.0	0.14012738853499998	0.0		0.08067166478696583	0.016860936997525403	0.0	0.14934829959742302	0.11345419847338642	0.0
17906149	0.0412532132337	3.5716653655999995e-05		0.005214631433770001	0.0	0.0033500837520900003	0.0		0.019243649899835392	0.000107149960968	0.0	0.02175144207647	0.005398735153490151	0.0
17906859	0.0699780592887	0.263335298398	0.263451506107	0.263451506107	0.0	0.994505494505	0.0	1.0000000000014713	0.0467774158668196	6.628782320839621	3.76008766764822	112.97382564622744	0.08814636116537404	0.07466730061809243
17906995	0.0102177499489	0.0		0.0	0.0	0.0062702265372200005	0.0		0.010217749948900002	0.00121413287707	0.0	0.14745740150145994	0.0128340830907666	0.0
17905899	0.025144901441900003	0.00139359943569		3.62893730233	0.0	0.006818181818180001	0.0		0.01034497840090977	4.38168214980569	0.0	13.075513666119999	0.012676681244837187	0.0
17906957	0.011622218637700002	0.0		0.0	0.0	0.0135838804619	0.0		0.008733659182509514	13.361858969792031	11.59584164838	129.145689247178	0.026902887139133073	0.013092668888798956
17908161	0.0	0.022301830817		0.666789253268	0.0	0.006519183498979999	0.0		0.0	0.11486059409785	0.0297434208042	41.286007033379505	0.03127822017898125	0.00969497126197015
17906887	0.120566956729	0.159090906382	0.159090906382	0.203766442137	0.0	0.263157894737	0.0	0.2504350726805956	0.05110046557731307	63.776383012836	60.601965695349996	196.873107851091	0.1377721943051467	0.13620381019580444
17908475	0.156808997872	0.0		0.0	0.0	0.0	0.0		0.156808997872	0.0	0.0	0.0	0.00042744176106034113	0.0
17908189	0.005043754732050001	0.0		0.0	0.0	0.00166293109681	0.0		0.005043754732050001	0.0	0.0	0.0	0.008349471411817147	0.0
17906549	0.0006220446734799999	0.0006304355920290001		0.00256009568329	0.0	0.0548628428928	0.0		0.0014969818920236365	71.12286815609204	0.0	294.38183282668325	0.07498026835043389	0.0
17906155	0.0889626792362	0.0		0.0	0.0	0.0	0.0		0.07860880952191887	7.143330731199999e-05	0.0	0.006964747462912001	0.0014151420196081713	0.0
17906815	0.213506867298	0.00320079225094	0.00370117890998	0.004868584886939999	0.0	0.6857142857140001	0.0	0.8036842316264635	0.16209574926129616	16.442347647077238	6.94935782903438	65.25477346633166	0.2747390873770185	0.23703986894477985
17906803	0.0	0.0		1.70813871128	0.0	0.0	0.0		0.0	66.323953922918	68.219012629001	221.91735104158798	0.1060555209284282	0.1080724534037206
17907053	0.00698308064699	0.0		0.0	0.0	0.0365521003819	0.0		0.004492784567700415	7.35286105392	0.0	26.000000617199998	0.02777343546455	0.0
17907083	0.0195831317401	0.0		0.0	0.0	0.0146443514644	0.0		0.005486950159301171	0.0	0.0	0.0	0.03169588259274853	0.0
17906097	0.082582003005	0.0		0.0011072162633399998	0.0	0.0382978723404	0.0		0.04965281661893385	0.033072284481029994	0.0	0.17852009406118202	0.10944570135747364	0.0
17906899	0.03774770678330002	0.312316099298	0.257539084763	2.0395852314500003	0.0	0.0343571056741	0.0	0.048622325529739725	0.006961793100924377	66.323953922918	68.219012629001	220.209212330308	0.12127192982479315	0.12357824345621712
17906681	0.035415253425500004	0.00500558840577		0.0275307362317	0.0	0.0224594992636	0.0		0.014836169726283762	0.03420485410607	0.0	1.0661903304317002	0.012015386610183205	0.0
17906649	0.170887213206	0.0		0.0	0.0	0.220430107527	0.0		0.01341528689883332	0.012356784842299998	0.0	1.306368655459	0.053523574998193116	0.0
17906243	0.0359619516101	0.00012000666902200002		0.29077615904	0.0	0.00815384615385	0.0		0.0359619516101	0.01968109371954	0.0	0.41696317151631	0.06414732064933709	0.0
17906911	0.0778326637427	7.60586253004	3.4074668425200003	51.519205518599996	0.0	0.0891711573005	0.0	0.09003174506662702	0.07973258372812142	73.61750035366	71.368940386758	269.688832617458	0.1178202629288922	0.1187065522476698
17906289	0.010760849262299999	0.0		0.0	0.0	0.000505816894284	0.0		0.017755266805141327	0.0	0.0	0.0	0.09765655013480316	0.0
17906807	0.014689202411200001	0.497205560736	0.959005607379	4.1852090740599985	0.0	0.105671641791	0.0	0.08356516869940225	0.013990339911723815	2.578635791554	2.8072544973136	30.724356245433487	0.2535415223820912	0.2368690021436953
17908159	0.0770578084063	0.0		0.00444567101295	0.0	0.0132069082289	0.0		0.028481114294883456	0.0259747777018	0.0	1.8743081009329496	0.009681881051168469	0.0
17906977	0.0313661666103	0.0		0.0	0.0	0.00335985292719	0.0		0.0313661666103	0.0	0.0	0.05236061425969999	0.009686653376265536	0.0
17906647	0.0049181072373500005	0.0		1.6453270393	0.0	0.0243690165361	0.0		0.012408889557363663	0.012356784842299998	0.0	2.951695694759	0.04769908427031349	0.0
17906259	0.0612127923625	0.000318951468216		0.000956854404649	0.0	0.0987483489528	0.0		0.061351246537761625	0.5064424952145461	0.0	8.931105197083749	0.09594401145224554	0.0
17908237	0.0	0.0		0.0705268903239	0.0	0.0	0.0		0.0	34.01214361191401	37.608180578818	212.7140597118779	0.07828542094454335	0.07515213518146023
17906055	0.10306828672	0.0		0.0	0.0	0.0523952095808	0.0		0.021470988683300902	0.035394263570199994	0.0	3.3737160548400005	0.1803779482810708	0.0
17906799	0.0386515352479	0.008051137789149999		27.0062395321	0.0	0.0218009478673	0.0		0.0038093141797920045	2.1113964650183497	1.8482488899346	63.6097798477735	0.2398255813950385	0.21948593264463667
17906975	0.015991204161700003	0.000386943574995		0.681653389998	0.0	0.000352982703848	0.0		0.012271417585968235	3.067713507367295	2.2927905088900005	21.243661331587997	0.033062701750903374	0.015250856537970816
17906905	0.0336661444429	63.2195648405	60.164465702799994	196.271614143	0.0	0.136471906964	0.0	0.13512745207327406	0.04085546856467739	80.39346091298046	68.06244572441432	242.71814997380073	0.22223009602117968	0.19455098522252465
17905785	0.153249237616	0.0		0.000934805022553	0.0	0.152542372881	0.0		0.0421058605126758	1.9805707034	0.0	2.875069846161553	0.11658579922099042	0.0
17906631	0.0403363332379	0.000102933605376		0.0483787945268	0.0	0.000354421407053	0.0		0.0403363332379	0.005558414690315999	0.0	0.2335048837958	0.010894364590433948	0.0
17906983	0.00371582739072	0.00382397750218		1.3809926896399998	0.0	0.0212187159956	0.0		0.03629322610826065	7.929093303382182	7.46277865628	39.353658160840006	0.026513014747322275	0.021557373772730874
17905839	0.012206691903699999	0.000217749911826		0.16836423182399998	0.0	0.00376196990424	0.0		0.012206691903699999	0.000609699753113	0.0	0.8506351332769999	0.0026190981807853713	0.0
17906809	0.0130514278569	0.0		0.0264660403591	0.0	0.0	0.0		0.0130514278569	0.08076676074417	0.0	1.84340800762464	0.016755793226395664	0.0
17906643	0.0137802062136	3.1817372235500003		19.1387410929	0.0	0.0121321631389	0.0		0.013851957443328148	4.271566533910129	0.0	148.93721956744199	0.027681850572856825	0.0
17905865	0.495597947012	0.0		0.000240013338043	0.0	0.0	0.0		0.06057581427447002	6.00033345108e-05	0.0	0.8228020993230429	0.07749019607844178	0.0
17905853	0.0265141940829	0.0		0.0	0.0	0.000807754442649	0.0		0.0265141940829	6.00033345108e-05	0.0	0.416928327442	0.0010820559062239411	0.0
17906327	0.975420097788	0.0		0.0	0.0	0.0	0.0		0.04405527031040562	0.0	0.0	0.0	0.09606924932596027	0.0
17906069	0.886987465147	0.0031047599623000004		0.0031047599623000004	0.0	0.545454545455	0.0		0.2353762800831152	0.7593953948814499	0.0	9.2205976080783	0.051528809842861616	0.0
17905941	0.133425486913	0.34412002300800004		1.57274167057	0.0	0.0991112828439	0.0		0.07082495973886192	0.3629381596327301	0.0	5.0940348886671005	0.17870588235296028	0.0
17906225	0.21294075145799998	0.0		0.0	0.0	0.444759206799	0.0		0.052244620322744614	0.0247723330976	0.0	0.437956153066	0.0966260543580112	0.0
17905929	0.029540397689099995	0.0		0.00468026009185	0.0	0.0	0.0		0.020305870760826617	0.34412002300800004	0.0	1.57742193066185	0.1386670761670747	0.0
17906241	0.10604602296700001	0.0		0.0	0.0	0.00027027027027	0.0		0.10604602296700001	0.0	0.0	0.0	0.006023612561242111	0.0
17906607	0.017748555547	0.402018430294		44.9966211837	0.0	0.0197575958825	0.0		0.0098546358215756	1.688436555270307	0.0	61.484751613726175	0.051816648781259966	0.0
17906625	0.00896972057218	0.0449314509751		6.504331252130001	0.0	0.0253568174916	0.0		0.004956339969211021	0.8433410057837001	0.0	104.69752033371999	0.02918265317984595	0.0
17905907	0.0703833810103	6.00033345108e-05		0.110586145503	0.0	0.00513934878587	0.0		0.0703833810103	0.0006000333451088001	0.0	0.1728696067253	0.005048839274386735	0.0
17906325	0.217699313237	0.0		0.0	0.0	0.0963855421687	0.0		0.07559798151733585	0.0	0.0	0.0	0.09611016467916553	0.0
17905789	0.011739612335600001	0.0		0.29867020470600003	0.0	0.0766994323688	0.0		0.0656226490025352	0.02804415067653	0.0	1.091852266342	0.04612101980520905	0.0
17906129	0.171053469465	0.0		0.0	0.0	0.0019727200992	0.0		0.171053469465	0.0	0.0	0.0	0.003647214854110693	0.0
17906667	0.002941409513	0.0		0.07174592374939999	0.0	0.000323258445127	0.0		0.002941409513	1.9871476084123	0.0	3.7424449112454	0.04332496713277773	0.0
17906511	0.0156831077007	0.0		0.123290000076	0.0	0.0	0.0		0.0156831077007	0.0368006472127	0.0	1.0096773313709	0.0069670227589543705	0.0
17905943	0.00869964135395	0.0		0.0270445390488	0.0	0.0	0.0		0.00869964135395	0.11053099454141	0.0	23.407584859367805	0.020904819722315712	0.0
17906675	0.017730382561999998	0.0		0.115599405937	0.0	0.0	0.0		0.017730382561999998	1.69596927189719	0.0	61.67106387215861	0.034112942317042524	0.0
17906373	0.0217441631655	0.0		0.0195610870505	0.0	0.0	0.0		0.056923971133294914	0.0	0.0	0.14694816621669998	0.035458452722099125	0.0
17906173	0.00488438474251	0.000107149960968		0.0363952700754	0.0	0.000988956650733	0.0		0.0061528037450682615	0.0020358492583879995	0.0	0.3257358813424	0.0024713612839454184	0.0
17905811	0.100567946328	0.0		0.356628116104	0.0	0.0017902431747	0.0		0.100567946328	0.0	0.0	0.965186185786	0.018199190136035312	0.0
17906967	0.00744953530103	0.0		0.0	0.0	0.00339406931047	0.0		0.00744953530103	13.353992903610006	11.59584164838	128.87398221113995	0.03321033210331676	0.02498097788245009
17905967	0.158808950744	0.0		0.0	0.0	0.0819835534513	0.0		0.158808950744	0.01881813662473	0.0	3.5212932180971004	0.1819544773068288	0.0
17905905	0.0483186066581	0.0		2.37075861777	0.0	0.00014490653528499998	0.0		0.0483186066581	0.0212333258241	0.0	7.6663398021750995	0.039319124991217605	0.0
17907117	0.0	0.0		0.0	0.0	0.0	0.0		0.0	0.0	0.0	0.0	0.017281677172606126	0.0
17905991	0.07520673179439999	0.0		0.0109806102155	0.0	0.0	0.0		0.07076646079018811	0.0	0.0	0.15792877643220002	0.034758795028474385	0.0
17906611	0.002922689939	0.0231653214432		11.820897688399999	0.0	0.0174278846154	0.0		0.0068774493724658645	1.1590281744066002	0.0	140.04291359373002	0.02566609630899718	0.0
17906219	0.0227984340726	0.000934805022553		4.07715210586	0.0	0.000166527893422	0.0		0.0227984340726	0.000934805022553	0.0	4.6174694088959995	0.04118592774730162	0.0
17906089	0.0162677910569	0.0		0.0	0.0	0.0	0.0		0.0162677910569	0.000318951468216	0.0	0.000956854404649	0.06201366670618823	0.0
17907037	0.0047480833323799996	0.0		0.0	0.0	0.000111408199643	0.0		0.0047480833323799996	0.00053574980484	0.0	0.124329671376	0.0012998266897735586	0.0
17905767	0.0226745401732	0.0		0.979675663635	0.0	0.0	0.0		0.0226745401732	0.00373922009021	0.0	4.948857789394999	0.0005284713964853276	0.0
17908905	0.007123621768999998	0.0		0.0	0.0	0.0682056663169	0.0		0.024534046846089497	0.0	0.0	0.0	0.011865354026054709	0.0
17906277	0.0482000322251	6.00033345108e-05		0.137167622692	0.0	0.0028853454821599995	0.0		0.0482000322251	0.0001800100035324	0.0	0.158588813112383	0.034920855317957335	0.0
17906175	0.0021437427348199997	0.00142866614624		0.0639685266979	0.0	0.00422854785479	0.0		0.0021437427348199997	0.00335736544366	0.0	0.35330913796490004	0.0031559845356774964	0.0
17906355	0.025713024862	0.0007800433486410001		0.0115206402261	0.0	0.0456226880395	0.0		0.05806661850167796	0.004020223412223	0.0	0.25951442175957384	0.02127069268474464	0.0
17905837	0.11117308249800001	0.0		0.00792609679047	0.0	0.0	0.0		0.111173082498	0.00043549982365220015	0.0	0.27915538696157	0.0017393194912448675	0.0
17905987	0.00276385312352	0.0		0.504866496893	0.0	0.0	0.0		0.01930826719068764	1.00894303344824	0.0	37.97499166732401	0.02311752927613265	0.0
17906565	0.0126657665015	0.0015242493827799998		0.218620911473	0.0	0.00614920524423	0.0		0.010174673734497923	0.005705047689837	0.0	0.565353261015035	0.00766339989683635	0.0
17906527	0.0651639786584	0.000566149770748		0.351404807705	0.0	0.00112387612388	0.0		0.0651639786584	0.008187396684665	0.0	0.8040071643765101	0.005631127992227915	0.0
17905935	0.4040208223920001	0.000420023341576		0.0005400300105980001	0.0	0.583333333333	0.0		0.059721852190914575	0.004440246753799	0.0	0.2600544517701718	0.021893764434193046	0.0
17906279	0.024315340696000002	0.0		0.0203411303992	0.0	0.024154589372	0.0		0.04896408139211561	0.0	0.0	0.12738707916619998	0.03791650708544648	0.0
17905891	0.07760280422789999	0.00240013338043		0.328518256447	0.0	0.005529149287029999	0.0		0.07760280422789999	0.0024601367149408	0.0	1.151080342432	0.017833677492022932	0.0
17908895	0.035939345680699994	0.0		0.0	0.0	0.00058711287245	0.0		0.035939345680699994	0.0	0.0	0.0	0.007557218943430963	0.0
17906551	0.0133996715441	0.0		2.50673895545	0.0	0.0	0.0		0.0133996715441	71.1222377205	0.0	296.88601168644993	0.05089106425702637	0.0
17905921	0.07335247508449999	0.0		0.0202811270647	0.0	0.00192864030858	0.0		0.04899672518996402	0.34550009970174905	0.0	1.7219099601636607	0.0473377569185988	0.0
17906295	0.0665842768599	0.0		0.0	0.0	0.0	0.0		0.05706521557207785	0.0	0.0	0.0	0.0006775251361821989	0.0
17905765	0.052064874292000005	0.0		0.006880897213699999	0.0	0.0	0.0		0.052064874292000005	0.00239524903009	0.0	0.2411798023383	0.006862248422603942	0.0
17906677	0.0139122926428	0.0		0.201809132399	0.0	0.0	0.0		0.0139122926428	3.8540662751370003	0.0	94.71252030189899	0.01487872817448093	0.0
17905961	0.133320190891	0.0		0.0	0.0	0.0	0.0		0.133320190891	0.0	0.0	0.105785878743	0.010672300774684946	0.0
17906499	0.0	0.0		0.0007838996825739999	0.0	0.0	0.0		0.0	0.002743648889009	0.0	0.083093366352764	0.008194405199217148	0.0
17906329	0.492093498083	0.0		0.303030312061	0.0	0.26388888888900003	0.0		0.07930180502011115	0.0	0.0	0.303030312061	0.09780775716695476	0.0
17906275	0.0074815990508100005	0.0356435977737		0.103859525276	0.0	0.0981308411215	0.0		0.02088296447440462	1.3091696741029	0.0	39.771334388447	0.02176729722726614	0.0
17906941	0.011184778764500001	0.0009832582727539998		0.286783662887	0.0	0.00135570242332	0.0		0.011184778764500001	13.362842228064785	11.59584164838	129.432472910065	0.02403637938501129	0.016418853198097126
17905817	0.0438049279622	0.0		0.00409369834233	0.0	0.014869888475799996	0.0		0.06598147810011665	0.0	0.0	0.045335531642230004	0.010115747495372182	0.0
17906757	0.0147260189903	0.0		0.0	0.0	0.017713365539500002	0.0		0.0009139374168475216	8.548311986789999	3.4604655523907004	56.194126127059995	0.06683335585892118	0.06435425993675302
17908151	0.0125412608484	0.0		0.0	0.0	0.0	0.0		0.0125412608484	0.31721890845783	0.257539084763	4.648860266310001	0.003952358062273537	0.00498870305734284
17906727	0.022550060096	0.0		0.0723164234369	0.0	0.0	0.0		0.022550060096	0.08076676074417	0.0	1.8892583907024398	0.01926808982535616	0.0
17906909	0.008972897711270002	0.0		0.0183226433255	0.0	0.0	0.0		0.008972897711270002	0.0008214830340880001	0.0	0.08282691982821999	0.02316810344829041	0.0
17906167	0.00815705278796	0.000428599843872		0.0173940103305	0.0	0.00107981643121	0.0		0.00815705278796	0.0005714664584959999	0.0	0.04064555186052	0.0016593182572439075	0.0
17906337	0.0	0.0		0.00457274814835	0.0	0.00383141762452	0.0		0.00035863324096091547	0.005008247972	0.0	0.28011348657315	0.0418851251841127	0.0
17906023	0.307478815538	0.0		0.0	0.0	0.705882352941	0.0		0.06761512999088845	0.0	0.0	2.0456396956017	0.1658339281465489	0.0
17906061	0.22460740496999998	0.035394263570199994		1.79810932931	0.0	0.219668199081	0.0		0.21178374490473514	0.7991363223988701	0.0	11.057565024132199	0.14336389434645908	0.0
17907039	0.010040330876600001	0.0		0.0	0.0	0.0	0.0		0.010040330876600001	0.0	0.0	0.0	0.015015688032279718	0.0
17906711	0.012778773087799998	0.0		0.33366341672100003	0.0	0.0	0.0		0.012778773087799998	0.7968264464868401	0.0	8.189944288043	0.018913287385806474	0.0
17906025	0.0496918643908	0.0		0.0	0.0	0.0235294117647	0.0		0.06559553435698799	0.035394263570199994	0.0	3.4708745647287	0.17324931791636206	0.0
17906513	0.0146269215489	0.00372037867783		0.332358499058	0.0	0.00333939007023	0.0		0.0146269215489	0.04052102589053	0.0	1.2187458303529	0.006257905598839078	0.0
17906637	0.0162217891752	0.0047574477503100005		0.131581764843	0.0	0.109452736318	0.0		0.002255877704074761	0.11425403086461006	0.0	21.603707376933	0.027045235803613742	0.0
17906073	0.0273424585373	0.0		0.0	0.0	0.0	0.0		0.08048616070334462	0.0	0.0	0.0	0.005329963184788605	0.0
17906223	0.027580990088	0.00233701255638		0.381400449201	0.0	0.00238095238095	0.0		0.04512185107478566	0.00233701255638	0.0	0.7155932447640001	0.08118602188492018	0.0
17906377	0.0161782016286	0.0		0.0016800933663	0.0	0.0189473684211	0.0		0.044162774220232716	0.0001200066690216	0.0	0.021421190420383	0.061900498784989634	0.0
17907105	0.00272591742027	0.0		0.0	0.0	0.0	0.0		0.00272591742027	0.0	0.0	0.0	0.02099094299415596	0.0
17908465	0.00832444453933	0.0		0.0	0.0	0.0	0.0		0.00832444453933	0.0	0.0	0.0	0.00483755703369832	0.0
17905859	0.0413409544184	0.0		0.0265654892428	0.0	0.00545454545455	0.0		0.051586876539085856	4.38472432320295	0.0	9.8920759539228	0.01438609818629879	0.0
17906033	0.0768588542918	0.0		0.0	0.0	0.0441767068273	0.0		0.04208609878255011	0.000318951468216	0.0	0.000956854404649	0.09192312092440988	0.0
17905949	0.0	0.0		0.491460464546	0.0	0.0625	0.0		0.003491336042511433	0.13631368399361	0.0	23.358966866964003	0.02504203699254326	0.0
17906071	0.392636644227	0.00031047599623		0.00031047599623	0.0	0.5714285714289999	0.0		0.2333235236128364	0.7640525348249001	0.0	9.259766170818429	0.052012012012015975	0.0
17906299	0.060551033543099986	0.0016800933663		0.525149183639	0.0	0.00198222829802	0.0		0.060551033543099986	0.006480360127163999	0.0	0.8122051359390717	0.011513219576231741	0.0
17905829	0.312568356972	0.0		0.0	0.0	0.228828828829	0.0		0.1044378148625713	0.0	0.0	0.29867020470600003	0.1374105197633904	0.0
17906501	0.011187920714700001	0.000435499823652		0.104171557818	0.0	0.000686298976791	0.0		0.011187920714700001	0.003179148712661	0.0	0.18648102448819	0.003696439348223242	0.0
17906537	0.015182908056299996	0.00117584952386		0.177117778279	0.0	0.005642361111109999	0.0		0.050096412363838105	0.007621246913916998	0.0	0.4526023566715101	0.008097580975809307	0.0
17906375	0.0031685120136100003	6.00033345108e-05		0.006600366796189999	0.0	0.0992063492063	0.0		0.02592272158110213	0.3441800263425108	0.0	1.5903226475816898	0.08584433318159447	0.0
17906063	0.163670769495	0.00993523187935		3.41474249255	0.0	0.079958463136	0.0		0.2290574288114868	0.75629063491915	0.0	9.217492848116	0.049535225048928086	0.0
17907051	0.0044803932789899996	0.0		0.0	0.0	0.0	0.0		0.008171323114205493	7.35286105392	0.0	26.000000617199998	0.02798637996176224	0.0
17908207	0.017543767841	0.0		0.0184297932865	0.0	0.0	0.0		0.01456586393935201	0.0005714664584959999	0.0	2.0974708372369	0.02253088395313936	0.0
17907075	0.018309670591	0.0		0.0	0.0	0.0	0.0		0.029299306342825925	0.0	0.0	0.0	0.0023566378633153315	0.0
17905875	0.0	0.0		0.0031355987303	0.0	0.0	0.0		0.00036930149670411116	0.005008247972	0.0	0.28324908530345	0.0416691085975686	0.0
17905955	0.0277478410103	0.0		0.0	0.0	0.00240802675585	0.0		0.0277478410103	0.0	0.0	0.0	0.004724327691827403	0.0
17906585	0.010702029794000001	0.00824854623534		0.110432241076	0.0	0.010197474911	0.0		0.010702029794000001	0.015128526591077	0.0	2.069870747390139	0.024512938568450326	0.0
17906705	0.0286865631151	0.0		0.169213306071	0.0	0.0	0.0		0.028686563115100008	1.2483275782869	0.0	23.416218819478	0.016119746689688484	0.0
17906349	0.9727623119850001	0.0		6.00033345108e-05	0.0	0.0	0.0		0.0490830342235803	0.34550009970174905	0.0	1.7016288330989608	0.0514972175602903	0.0
17906067	0.036157822323300004	0.0		0.0	0.0	0.000132784490771	0.0		0.036157822323300004	0.0	0.0	0.0	0.0023059377898105447	0.0
17906145	0.0253802538123	0.0		0.0	0.0	0.0	0.0		0.0253802538123	0.000107149960968	0.0	0.02175144207647	0.003165558721121209	0.0
17906321	0.0487921441094	0.0		0.0	0.0	0.08771929824560001	0.0		0.0758128864952693	0.0	0.0	0.0	0.1296780684103631	0.0
17906577	0.0	0.0		0.022297590971	0.0	0.00035536602700800003	0.0		0.0006826875270662268	0.16265671449941	0.0	15.273719804077801	0.02171833141983129	0.0
17908477	0.0798877856181	0.0		0.0	0.0	0.0	0.0		0.0798877856181	0.0	0.0	0.0	0.0005003335557041367	0.0
17906855	0.0475831615369	0.00142495415639		0.0957257020382	0.0	0.00337058719177	0.0		0.0475831615369	0.41371518971598	0.0	2.5947533077842997	0.009294818277947058	0.0
17905857	0.04336537043819999	0.0		1.21283994098	0.0	0.00913580246914	0.0		0.04336537043819999	0.0	0.0	1.21283994098	0.0643417139767558	0.0
17905795	0.049528157924800004	0.0		0.170672380889	0.0	0.0	0.0		0.049528157924800004	0.0028307488537410003	0.0	0.311251723964	0.004954159785890357	0.0
17905879	0.0140381370946	0.0		0.0	0.0	0.0160098522167	0.0		0.03594944477177413	4.38472432320295	0.0	9.86551046468	0.01846217673902608	0.0
17906021	0.140013356057	0.0		0.372874460183	0.0	0.347941567065	0.0		0.07099114338126385	0.035394263570199994	0.0	3.843749024911701	0.20314261555837326	0.0
17906391	0.0	0.00644567236304		2.41303928444	0.0	0.00384615384615	0.0		0.018560442154254026	1.00894303344824	0.0	37.47012517043101	0.023530138339917368	0.0
24604483	0.09126685559910001	0.0		0.0	0.0	0.0	0.0		0.09126685559910001	0.0	0.0	0.0	0.014638723803542468	0.0
17906141	0.0321892630098	0.0		0.0	0.0	0.00110889332446	0.0		0.03085884383587998	0.0	0.0	0.0	0.01890919353698164	0.0
17907101	0.0917941778077	0.0		0.0	0.0	0.0	0.0		0.0917941778077	0.0	0.0	0.0	0.0037382335720417322	0.0
17907111	0.0456778948784	0.0		0.0	0.0	0.0	0.0		0.0456778948784	0.0	0.0	0.786484169075	0.00986751941526595	0.0
17906013	0.0018296642717000001	0.0257826894522		0.198724974951	0.0	0.00370713623726	0.0		0.0215857069886534	1.2483275782869	0.0	23.738465977953002	0.019725913621254768	0.0
24604441	0.06621575423840001	0.0		0.0	0.0	0.0	0.0		0.06621575423840001	0.0	0.0	0.0	0.0001384466288246457	0.0
17906529	0.05967980799330001	0.0		0.16888683161200002	0.0	0.0	0.0		0.05967980799330001	0.007621246913916998	0.0	0.6214891882835101	0.007051472775959144	0.0
17906641	0.0	0.0		0.015242493827799996	0.0	0.0	0.0		0.0	0.11425403086461006	0.0	21.618949870760797	0.024911347517690318	0.0
17906715	0.00726292954933	0.0		0.0	0.0	0.000248077400149	0.0		0.00726292954933	0.8086048697730001	0.525261674193	40.300368551300004	0.024253834653095004	0.005972976574775846
17906603	0.0172884322366	0.000740349700209		0.0008274496649389999	0.0	0.284444444444	0.0		0.03034143070095845	0.006053447548769	0.0	3.5915844394849388	0.03387637028013192	0.0
17906037	0.561053175339	0.0		0.0971585098887	0.0	0.245283018868	0.0		0.09098080153259107	0.035394263570199994	0.0	3.4708745647287	0.1952558919994227	0.0
17906659	7.01442710546e-05	0.0		3.7074348654	0.0	0.0	0.0		7.01442710546e-05	0.7570097441126001	0.0	98.75372727543	0.01955434288313729	0.0
17908137	0.00980002263079	0.00035623853909800017		0.11844931425	0.0	0.0006412311638350001	0.0		0.00980002263079	0.025827294084598	0.0	0.7424011154800001	0.00768952415415631	0.0
17908167	0.0014465276249600002	0.0		0.0	0.0	0.0008789920890710001	0.0		0.0014465276249600002	19.68884404549102	3.83697975957	197.276735788064	0.05313420705081096	0.01877437851421253
17906535	0.025635722503400002	0.0		0.35275485715800003	0.0	0.000161147369269	0.0		0.025635722503400002	0.006445397390056999	0.0	0.6282394355505101	0.005752581470934854	0.0
17905937	0.188479357709	0.0212333258241		3.01722068443	0.0	0.06219042377550001	0.0		0.06690161795621548	0.53979597683083	0.0	15.551402218152099	0.10554386651666192	0.0
17908125	0.0332711232541	0.0008709996473039999		0.407976234797	0.0	0.0017612374607600004	0.0		0.0332711232541	0.005051797954361	0.0	0.754708584339035	0.006245432197194976	0.0
17908459	0.0166116051786	0.0		0.0	0.0	0.0	0.0		0.01324799291913159	0.0	0.0	0.0	0.013748191027496857	0.0
17905901	0.00045147122025199996	0.00443577283295		0.41893410089	0.0	0.0389268805892	0.0		0.0067109734556963	4.38472432320295	0.0	9.86551046468	0.018772394453955003	0.0
17906699	0.020083954352500002	0.0		0.265397711628	0.0	0.0	0.0		0.020083954352500002	1.00894303344824	0.0	38.240389378951996	0.016824906160297734	0.0
17905951	0.00352434323743	0.0		0.159530427016	0.0	0.0	0.0		0.00352434323743	0.13631368399361	0.0	23.518497293979998	0.016604284462842653	0.0
17906999	0.025074933220599997	1.31294010812		1.85254257428	0.0	0.00933009889905	0.0		0.025074933220599997	1.3170682003214274	0.0	4.874681659364	0.01405831597739678	0.0
17906495	0.0329703739625	0.0		0.0117584952386	0.0	0.0	0.0		0.04178231527291005	0.00239524903009	0.0	0.2342989051246	0.0071074222476626295	0.0
17908449	0.00216168951759	0.0		0.0	0.0	0.003125	0.0		0.003566642989431542	0.0	0.0	0.0	0.01134614097329535	0.0
17907073	0.0218672074622	0.0		0.0	0.0	0.0006944444444439997	0.0		0.0218672074622	0.0	0.0	0.0	0.013673008706875956	0.0
17906287	0.0429405872062	0.0		0.0	0.0	0.0007393859205349999	0.0		0.04136778396332464	0.0	0.0	0.0	0.0036363636363653342	0.0
17906651	0.00196306992211	0.060842095816		15.8337246091	0.0	0.021591738813	0.0		0.0033469930288431127	0.17509612668061006	0.0	37.437431986033	0.02442809230614095	0.0
17905819	0.0249258727383	0.0		0.0146763440571	0.0	0.024	0.0		0.05977071848468995	0.0	0.0	0.0412418332999	0.009710787418191978	0.0
17907057	0.011153482139	0.0		0.0	0.0	0.0014539110206500002	0.0		0.011153482139	0.0	0.0	0.140038650949	0.021270640917998167	0.0
17906265	0.20210936412799999	0.0		0.0	0.0	0.160683760684	0.0		0.013489879699015606	0.0	0.0	0.13230735259610002	0.05975503510485455	0.0
17908149	0.0	0.0		0.0	0.0	0.0025572722429400003	0.0		0.0	0.94244945675	0.0529987098707	4.67492060846	0.019403258283007523	0.015291165873133204
17907107	0.012806058347700001	0.0		0.0	0.0	0.0	0.0		0.012806058347700001	0.0	0.0	0.0	0.0059548331523215405	0.0
17906521	0.0	0.0		0.117628502368	0.0	0.000370164723302	0.0		0.0	0.0100006398388	0.0	0.15933974862630002	0.01068007992836276	0.0
17906345	0.060401325389400004	0.0		0.0280594833421	0.0	0.00551977920883	0.0		0.04996281237428968	0.0212333258241	0.0	5.2955811844051	0.07627118644069697	0.0
17906509	0.061151836449800004	0.000130649947096		0.13988254335699998	0.0	0.000551040088166	0.0		0.061151836449800004	0.012134588974696004	0.0	0.2274954710282	0.01048918592780052	0.0
17905855	0.618762815564	0.0		0.0	0.0	0.421052631579	0.0		0.07617929914516701	0.0	0.0	0.0	0.09610688119523632	0.0
17908205	0.0474469404781	0.0		0.0	0.0	0.0	0.0		0.0474469404781	0.0	0.0	0.0	0.011639958542626666	0.0
17906005	0.0928318806237	6.00033345108e-05		0.00198011003886	0.0	0.03125	0.0		0.0496627556383997	0.3442400296770216	0.0	1.5924827676240827	0.08127853881277006	0.0
17906719	0.00730944299692	0.0		0.0	0.0	0.0	0.0		0.00730944299692	0.0	0.0	0.00385739859485	0.005075253762684069	0.0
17906347	0.0613780169195	0.0006600366796189999		0.0118206568986	0.0	0.0570776255708	0.0		0.049566402181646256	0.34550009970174905	0.0	1.7015688297644498	0.051506316812443366	0.0
17906093	0.0787666972477	0.0		0.0	0.0	0.0	0.0		0.0748704775809253	0.0	0.0	0.0	0.005175541564399093	0.0
17908427	0.0	0.0		0.0	0.0	0.5	0.0		0.020072320574280315	0.0	0.0	0.0	0.013176200998449893	0.0
17905957	0.023175693493300002	0.0		0.0	0.0	0.00317796610169	0.0		0.027235178312111617	0.0	0.0	0.0	0.00619326376516507	0.0
17906065	0.268057066416	0.00745142390952		0.0419628467062	0.0	0.169014084507	0.0		0.2739097982594698	0.7637420588286701	0.0	9.259455694822199	0.05157489781197764	0.0
17906615	0.00280298679306	0.6723290515870001		75.3719700766	0.0	0.0275729400449	0.0		0.011983840925149529	2.35919872435013	0.0	136.84271313453206	0.03944013146713643	0.0
17906317	0.29240919896	0.0		0.0	0.0	0.20202020202	0.0		0.07281612968901796	0.0	0.0	0.29867020470600003	0.12528595394225914	0.0
17905919	0.0204457317655	0.0		1.5903565918200002	0.0	0.0017172295363499998	0.0		0.04466580776991829	0.0336724330845	0.0	8.211610467293001	0.10740072202169854	0.0
17905787	0.0	0.00182909925934		0.0030484987655700004	0.0	0.0392313851081	0.0		0.02508259201552981	0.006401847407689999	0.0	0.05387132818577	0.018063850180677705	0.0
17907033	0.048830451398200005	0.0		0.0	0.0	0.00156316612193	0.0		0.048830451398200005	1.8949980216164573	1.54937242984	29.024276619224	0.014599265070986125	0.01168045054402468
17906581	0.0171347603969	0.0		0.104911907518	0.0	0.0	0.0		0.0171347603969	0.007490596966819999	0.0	2.02682488482	0.012409561315120915	0.0
17906497	0.0	0.0		0.00317914871266	0.0	0.0	0.0		0.0	0.002743648889009	0.0	0.08627251506542401	0.006867156050208261	0.0
17906269	0.07848382675589999	0.000240013338043		0.294976392455	0.0	0.000631412786109	0.0		0.07848382675589999	0.0028801600565229995	0.0	0.398062121145	0.004541522491350813	0.0
17906613	0.00526509792951	0.0615153710824		7.85342464503	0.0	0.0916129032258	0.0		0.018791992146734705	1.15134468144253	0.0	137.65190311957204	0.03493132593769965	0.0
17907085	0.00902676484128	0.0		0.0	0.0	0.00249104779698	0.0		0.03047542744356489	0.0	0.0	0.8996611592589999	0.01495054818677474	0.0
17905801	1.0	0.0		0.0	0.0	0.666666666667	0.0		0.07156081291979109	0.0	0.0	0.29867020470600003	0.11746420497352142	0.0
17908147	0.006892823221069999	0.0		0.0	0.0	0.00280224179343	0.0		0.006892823221069999	0.94244945675	0.0529987098707	4.67492060846	0.018945634266896383	0.01474505280623559
17907095	0.00294839377662	0.0		0.0	0.0	0.000207986688852	0.0		0.012318307437570165	0.0	0.0	0.0	0.015787165619061683	0.0
17906657	0.0	0.0257826894522		0.397868776345	0.0	0.08080808080810001	0.0		0.0034122417019602576	0.13631368399361	0.0	22.867506402417998	0.024861211682345542	0.0
17906105	0.00588498819196	0.0		0.0	0.0	0.0	0.0		0.004620299553319279	0.035394263570199994	0.0	3.3737160548400005	0.156226925917078	0.0
17906881	0.0079565096516	0.0		0.0571818985045	0.0	0.00040535062829300016	0.0		0.0079565096516	0.401068721578	0.0	2.1675532580947	0.0053745381256298285	0.0
17906251	0.028299407192799997	0.0		0.0	0.0	0.0	0.0		0.028299407192799997	0.0	0.0	0.0	0.0032161727544224817	0.0
17906081	0.0238013111686	0.0		0.0	0.0	0.0	0.0		0.05705561484415305	0.0	0.0	0.0	0.005352610087185068	0.0
17905783	0.0287609009773	0.0		0.13735664438	0.0	0.0	0.0		0.0287609009773	0.006401847407689999	0.0	0.19122797256577	0.011096014492777705	0.0
17906215	0.0705786265139	0.00327181757893		0.6538961132760001	0.0	0.0151551599711	0.0		0.03674285593262957	1.9838425209789297	0.0	3.5280311544150003	0.0796487242223217	0.0
17906139	0.068709827918	0.0		0.0	0.0	0.0	0.0		0.068709827918	0.0	0.0	0.0	0.0019463740393937594	0.0
17908219	0.00236277117031	0.0		0.0	0.0	0.0	0.0		0.008508940689468855	0.0	0.0	0.0	0.026550425995653697	0.0
17905835	0.13560369041099998	0.0		0.052564828714800005	0.0	0.0	0.0		0.13560369041099998	0.00043549982365220015	0.0	0.32379411888590004	0.0015055989460771185	0.0
17906137	0.0357280617051	0.0		0.0	0.0	0.0612691466083	0.0		0.1244483459624536	0.0	0.0	0.0	0.025152385623197063	0.0
17906389	0.0053037538557700005	0.915872575817		18.334032036	0.0	0.0250535684852	0.0		0.012267145760912668	1.05218625981061	0.0	41.69299890296401	0.025045116422357443	0.0
17905821	0.040231327469	0.0		0.0	0.0	0.0	0.0		0.040231327469	1.9805707034	0.0	2.35578314418223	0.04292866703004882	0.0
17905945	0.186544487921	0.0		0.123215912026	0.0	0.235993208829	0.0		0.21006621213741924	0.5185626510067299	0.0	12.249306345117095	0.11261388715980696	0.0
17906085	0.0880144519211	0.0		0.0	0.0	0.0	0.0		0.08365905778459548	0.0	0.0	0.0	0.0052574525745240006	0.0
17906871	0.07963313145819999	0.0		1.47339352643	0.0	0.0	0.0		0.021713861278862358	0.0005714664584959999	0.0	2.0790410439504	0.025028441410686584	0.0
17906665	0.00482773468167	0.0		0.720263040144	0.0	0.00856989823246	0.0		0.00482773468167	0.012356784842299998	0.0	2.026631695603	0.042062806107752	0.0
17906231	0.483937011153	0.0		0.0	0.0	0.409090909091	0.0		0.10362322914411347	0.0	0.0	0.29867020470600003	0.11823308270666405	0.0
17906051	0.0175397144245	0.00493218237534		0.463625143282	0.0	0.006818181818180001	0.0		0.013174244899796978	1.10349875950454	0.0	12.570529373778	0.024253857037005336	0.0
17906717	0.00230891322264	0.00342091077255		0.7817201034119999	0.0	0.00137986290394	0.0		0.00230891322264	1.97821173434255	0.0	7.681561887355309	0.014139260745525212	0.0
17906361	0.0462817606001	0.000360020007065		0.027001500529900004	0.0	0.0338842975207	0.0		0.05946101963773194	0.004800266760864	0.0	0.2870559523000718	0.02309929372664617	0.0
17906569	0.0179233637187	0.000304849876557		0.14214714244	0.0	0.00146966197775	0.0		0.013600283796744958	0.004485648183614001	0.0	0.49336514016565003	0.007549577329999231	0.0
17908453	0.0277791348763	0.0		0.0	0.0	0.0	0.0		0.0277791348763	0.0	0.0	0.0	0.008929180014996473	0.0
17906543	0.0	0.0		0.0322269869503	0.0	0.0	0.0		0.0	0.000609699753114	0.0	0.17981787718595002	0.004634831460679038	0.0
17906111	0.0224723298159	0.0		0.0	0.0	0.0	0.0		0.0224723298159	0.0	0.0	0.0	0.002347132855809945	0.0
17906605	0.0201646964833	0.00233109050896		0.945053118223	0.0	0.0162367421762	0.0		0.009918103952512488	1.1381939434723598	0.0	129.16706902355298	0.0235089246843718	0.0
17908467	0.010998583274	0.0		0.0	0.0	0.0	0.0		0.010998583274	0.0	0.0	0.0	0.003746877601998128	0.0
17906993	0.0117687297498	0.00139294949258		0.19997754382	0.0	0.0021540670838000003	0.0		0.0117687297498	0.002321582487636	0.0	0.27316096716112	0.011848664891078357	0.0
17906217	0.040643148088699996	0.0387944084359		3.5947927142300005	0.0	0.0124074074074	0.0		0.040643148088699996	0.06683855911243	0.0	4.3524521850090006	0.017658600392399446	0.0
17905793	0.0660168267966	0.00531309784856		1.32313556422	0.0	0.0030802861685200003	0.0		0.0660168267966	0.00531309784856	0.0	4.18911200808223	0.005250297186632063	0.0
17908443	0.0089622718699	0.0		0.0	0.0	0.00375093773443	0.0		0.02172864394795993	0.0	0.0	0.0	0.00945849022772337	0.0
17905939	0.8891300449349999	0.0		0.0	0.0	0.862831858407	0.0		0.2327406718132793	0.5185626510067299	0.0	12.426244394787098	0.1291305742701789	0.0
17905779	0.0184873050517	0.0031355987303		0.801537425432	0.0	0.00235601533552	0.0		0.0184873050517	0.00953744613799	0.0	0.85540875361777	0.005891920600156426	0.0
17905927	0.0184433743418	0.00072004001413		0.112326242204	0.0	0.004563084645220001	0.0		0.04445062378216957	0.34484006302213005	0.0	1.68974817286585	0.051038973475057516	0.0
17906563	0.0035632860901100008	0.00457274814835		0.0508228294202	0.0	0.015916842618200002	0.0		0.013081290694623129	0.06841920973971001	0.0	8.849300592673199	0.01886519347679964	0.0
17906335	0.00433895951044	0.0		0.0104519957677	0.0	0.0	0.0		0.0051345111865226	0.005008247972	0.0	0.2937010810711501	0.04053591790195627	0.0
17906043	0.0571218369575	0.713593594555		5.63586291671	0.0	0.037404715476	0.0		0.04697524906482424	1.9361384833897	0.0	29.175603919712	0.02588111520252506	0.0
17908175	0.0102238741634	0.0		0.0	0.0	0.000637261595885	0.0		0.0102238741634	0.00393303309102	0.0	0.121596273064	0.009535777646366577	4.3888739482139236e-05
17906369	0.280303320704	0.0		0.00744041347934	0.0	0.0	0.0		0.07014847359247464	0.0	0.0	0.16536918991153998	0.034065102195341264	0.0
17906263	0.007852205051850001	0.0		0.0	0.0	0.005503233859069999	0.0		0.01478867056041769	0.50325298053238	0.0	8.916752381013998	0.0460204266634655	0.0
17905975	0.034899829484699996	0.0		0.077644314857	0.0	0.0	0.0		0.034899829484699996	0.0	0.0	0.24301350476854	0.03044280442807527	0.0
17906017	0.141818155058	0.0		0.0974550173851	0.0	0.198555956679	0.0		0.07225250885845674	0.035394263570199994	0.0	3.5683295821138	0.19532417089965	0.0
24604485	0.0	0.0		0.0	0.0	0.0	0.0		0.0	0.0	0.0	0.0	0.0007123041163675447	0.0
17906821	0.0131356260519	0.0		0.039145452407	0.0	0.0	0.0		0.013135626051900004	0.0005714664584959999	0.0	2.1366162896439	0.018654936668604384	0.0
17905887	0.000270584147122	0.0		0.0427225327003	0.0	0.0	0.0		0.000270584147122	0.006358297425320399	0.0	0.15760738617977	0.012538074661763566	0.0
17907115	0.0599951724485	0.0		0.0	0.0	0.0	0.0		0.0599951724485	0.0	0.0	0.0	0.0034998409163167995	0.0
17905969	0.0740011753807	0.0		0.0	0.0	0.00041160732661	0.0		0.0740011753807	0.0	0.0	0.0	0.006003826614757736	0.0
17906267	0.0673499665981	0.499744514382		8.904951176689998	0.0	0.0916243984914	0.0		0.07023583774246132	0.499744514382	0.0	10.950590872291697	0.10755324038612404	0.0
17906695	0.006875131698439999	0.0254710555455		0.62395180123	0.0	0.00884722734215	0.0		0.009655929326051171	1.71983725401675	0.0	62.17033218470464	0.023490369599185167	0.0
17906663	0.0106638204185	0.0		0.0	0.0	0.00343386085399	0.0		0.0106638204185	0.03420485410607	0.0	1.0661903304317002	0.008868694057423668	0.0
17906029	0.5487748175980001	0.0		0.0	0.0	0.189440993789	0.0		0.08039589920907943	0.035394263570199994	0.0	3.4708745647287	0.1951165041319504	0.0
17906235	0.00918260062124	0.00091454962967		0.4243074781840001	0.0	0.00245159668092	0.0		0.00918260062124	4.3856388728326205	0.0	10.289817942864	0.010075732630881478	0.0
17906883	3.32886575804e-05	0.000107149960968		0.0086791468384	0.0	0.005012531328319999	0.0		0.014735490977289512	0.000928632995056	0.0	0.07318342334111999	0.031160604822250543	0.0
17905997	0.0450597006983	0.0		0.000180010003533	0.0	0.06	0.0		0.03868676947780717	0.3441800263425108	0.0	1.5905026575852228	0.08561118628775961	0.0
17906533	0.00402788628566	0.0		0.053784228221000006	0.0	0.0	0.0		0.00402788628566	0.005705047689837	0.0	0.6191374892360351	0.007057865448126912	0.0
17905799	0.19332933056600002	0.0		0.563687428599	0.0	0.108628107075	0.0		0.1321526519010222	1.9805707034	0.0	2.91947057278123	0.07640652576302245	0.0
17908257	0.0	0.0		0.0	0.0	0.188679245283	0.0		0.01976547517755783	0.0	0.0	0.0	0.012697632505944068	0.0
17906323	0.139836723582	0.0		0.0	0.0	0.232931726908	0.0		0.07662261333016969	0.0	0.0	0.0	0.09432327025856392	0.0
17906113	0.23321124090599998	0.00124190398492		0.00124190398492	0.0	0.20801449859	0.0		0.23321124090599998	0.7652944388098201	0.0	9.261008074803348	0.13687900531280675	0.0
17906083	0.0889903179375	0.0		0.0	0.0	0.0	0.0		0.04356542210204992	0.0	0.0	0.0	0.0052181397600714295	0.0
17906653	0.0116611071756	0.0		0.910902694246	0.0	0.0	0.0		0.008873709605825886	0.11053099454141	0.0	23.380540320319003	0.02396369137669147	0.0
17906741	0.015192736558100004	0.0		0.0781480381993	0.0	0.0	0.0		0.015192736558100004	0.0	0.0	4.16787105223446	0.017914808549906826	0.0
17906249	0.043850589979	0.0		0.0	0.0	0.00645577792124	0.0		0.04219477405616122	0.0	0.0	0.0	0.006900661836206418	0.0
17906545	0.0	0.000391949841287		0.0066195973195100006	0.0	0.00960614793468	0.0		0.023651869758377745	0.006445397390056999	0.0	0.27548457839251	0.008856682769726003	0.0
17905863	0.147842332348	6.00033345108e-05		0.519531773924	0.0	0.0690690690691	0.0		0.0783510372049951	6.00033345108e-05	0.0	0.822562085985	0.096523023224602	0.0
17905877	0.014556225760399999	0.00108874955913		0.493247100268	0.0	0.00184996172493	0.0		0.014556225760399999	0.0033533486421234004	0.0	0.53880038182197	0.003959022080731756	0.0
17905913	0.0	0.0		0.0174199929461	0.0	0.0	0.0		0.0	0.04968889872541	0.0	6.668575503746902	0.017794934563562338	0.0
17905841	0.011940799145899999	4.35499823652e-05		0.0347093359451	0.0	0.00124378109453	0.0		0.09567701696669953	0.00043549982365220015	0.0	0.7169802373980999	0.0017615325332997398	0.0
17906627	0.0	0.0		0.0105390957324	0.0	0.0013736263736300002	0.0		0.0	0.1094965831143	0.0	21.482664707822398	0.0224130528123344	0.0
17905993	0.0159906586967	4.38028855037		9.44657636379	0.0	0.0152692694523	0.0		0.013689677594290931	4.880033064752	0.0	18.724402000662998	0.06830348901607887	0.0
17908139	0.0148232222266	0.0008905963477449998		0.620211296569	0.0	0.000489284665819	0.0		0.0148232222266	0.026361651893245	0.0	1.244163097799	0.005923034784993519	0.0
24604449	0.0009412053318189999	0.0		0.0	0.0	0.0	0.0		0.0009412053318189999	0.0	0.0	0.0	0.01643192488261709	0.0
17905903	0.0	0.0		0.0124552949565	0.0	0.0	0.0		0.0	0.0449314509751	0.0	6.5273256428189015	0.016336394393396122	0.0
17905995	0.563335020609	0.00350846615038		0.011801204324	0.0	0.188888888889	0.0		0.010674143040117302	0.50325298053238	0.0	9.289626841196998	0.10469269614488863	0.0
17906143	0.15447232954	0.0		0.0	0.0	0.0	0.0		0.14099685036474638	0.0	0.0	0.0	0.02155508856198689	0.0
17907077	0.015391640156700004	0.0		0.0	0.0	0.0	0.0		0.015391640156700004	0.0	0.0	0.0	0.002510460251046373	0.0
17905977	0.17334461574299995	0.012439107260399998		2.94408876623	0.0	0.386634844869	0.0		0.19293611089463286	0.5185626510067299	0.0	11.8742371089091	0.1007834534629196	0.0
17906687	0.0140903615962	0.0		0.269494454828	0.0	0.0	0.0		0.014090361596199997	1.69596927189719	0.0	61.824958921049614	0.029325971455384407	0.0
17906057	0.0184631132958	0.0		0.424028271809	0.0	0.00040453074433699986	0.0		0.0184631132958	0.0	0.0	2.4696679674107003	0.060246148549784675	0.0
17906877	0.013789367930000001	0.0		0.0258588572469	0.0	0.000254517688979	0.0		0.013789367930000001	0.40659041893402	0.0	2.2001750346052003	0.00799507995079392	0.0
17906255	0.0386022142009	0.00264014671848		0.10308572869	0.0	0.00782804829508	0.0		0.056815162264331726	0.34682017306099083	0.0	1.6935883862752228	0.05412952421865714	0.0
17906127	0.0207847303858	0.0		0.0	0.0	0.00513911040227	0.0		0.0207847303858	0.0	0.0	0.0	0.0052678438937496476	0.0
17906119	0.0005282375800759999	0.0		0.000464316497528	0.0	0.0	0.0		0.009252387938494531	0.0008214830340880001	0.0	0.064254259927128	0.033900213988083	0.0
17908231	0.0547372289891	0.041399810696		3.1468966715599995	0.0	0.123636363636	0.0		0.03376145875158758	0.7984095548086001	0.0	98.19318908159	0.031556141672949546	0.0
17905981	0.0307249029542	0.0005400300105980001		0.0622834612223	0.0	0.00479708337331	0.0		0.05898021012483301	0.0005400300105980001	0.0	0.30037669256140004	0.03047339688749757	0.0
17905815	0.0688652157671	1.9805707034		2.31044761254	0.0	0.126973896229	0.0		0.14032917299484773	1.9805707034	0.0	2.35578314418223	0.05410323284994816	0.0
17906221	0.106594622567	0.0		0.24164709833	0.0	0.000827129859388	0.0		0.030462371729739687	0.0	0.0	0.575839893893	0.09519841683157196	0.0
17905771	0.0346494169738	0.000479049806017		0.289563832746	0.0	0.000983042516589	0.0		0.0346494169738	0.000479049806017	0.0	11.467398016826005	0.005345351640289714	0.0
17906371	0.11459979870999999	0.0		0.251853324182	0.0	0.215616681455	0.0		0.1941504358160137	0.5185626510067299	0.0	12.126090433091099	0.1083596768528666	0.0
17906595	0.0094230538486	0.00893182412256		0.167723689432	0.0	0.022792022792	0.0		0.01723800210733339	1.2851812184682971	0.0	9.171396855736141	0.046614945958479904	0.0
17906853	0.09896081177470001	0.0		0.15000808936	0.0	0.0	0.0		0.09896081177470001	0.00035716653656	0.0	0.5697622563269	0.004609622587146714	0.0
17906567	0.0	0.000304849876557		0.000958099612035	0.0	0.0975609756098	0.0		0.033063511039897416	0.004180798307057	0.0	0.3467323495420349	0.008070044245026482	0.0
17905953	0.031940576924299996	0.0		0.0	0.0	0.00166407810073	0.0		0.031940576924299996	0.0	0.0	0.0	0.004230565838179939	0.0
17905827	0.0012968444008399998	0.0		0.0493856800022	0.0	0.0	0.0		0.0012968444008399998	0.00461629813071	0.0	0.155604086991	0.012465795074502434	0.0
17906171	0.0275525898703	0.00192869929742		0.289340611267	0.0	0.00278885868606	0.0		0.02107324363708289	0.002750182331508	0.0	0.3531305546966	0.010225774333312091	0.0
17906049	0.11868337770500001	0.032761808484799995		0.16688743885600002	0.0	0.074427480916	0.0		0.118683377705	1.0530277160575	0.0	10.516998858022	0.03131278143403152	0.0
17906153	0.120561994641	0.0		0.0	0.0	0.0	0.0		0.120561994641	0.0	0.0	0.0	0.02203670738443875	0.0
17905923	0.111740027774	0.00324018006359		0.312977392809	0.0	0.00789935634874	0.0		0.111740027774	0.014160786944555397	0.0	0.42254348162572297	0.04911104634219966	0.0
17905963	0.0494804019707	0.0		0.0	0.0	0.0	0.0		0.0494804019707	0.0	0.0	0.105785878743	0.010256410256404044	0.0
17908193	0.00733706237242	0.0		0.0	0.0	0.00043854840478	0.0		0.00733706237242	0.0	0.0	0.0	0.009108216058861756	0.0
24604491	0.0770645938875	0.0		0.0	0.0	0.0	0.0		0.0770645938875	0.0	0.0	0.29867020470600003	0.08251617637241668	0.0
17906107	0.022164314798400003	0.0		0.0	0.0	0.00425381070542	0.0		0.025253219432904712	0.0	0.0	0.0	0.014884549328899332	0.0
17907025	0.010800465312099999	0.00285733229248		0.538892870361	0.0	0.00232164554765	0.0		0.010800465312099999	0.0042859984387200005	0.0	1.0114005347778	0.008173991317856684	0.0
17906007	0.0007668002594560001	0.271028715244		4.61038897718	0.0	0.0146974885845	0.0		0.0009657710350513693	1.2735260763292	0.0	39.667474863171	0.021054925893640768	0.0
17906039	0.164851212859	0.0		1.57560672553	0.0	0.0991221653255	0.0		0.055584776247164916	0.035394263570199994	0.0	3.3737160548400005	0.193799058085118	0.0
17908429	0.0202144254987	0.0		0.0	0.0	0.0005899705014750001	0.0		0.0202144254987	0.0	0.0	0.0	0.011642949547222895	0.0
17906227	0.20371827039	0.0		0.0	0.0	0.202190645352	0.0		0.0869468256739536	0.0247723330976	0.0	0.437956153066	0.10493179433360378	0.0
17906233	0.042660725294399994	0.0		0.0	0.0	0.0	0.0		0.05068568234208437	0.0	0.0	0.29867020470600003	0.08856590534824217	0.0
17906619	0.0305565545837	0.00749652570812		0.07563732554260001	0.0	0.0887573964497	0.0		0.044874863066617865	1.69436619847125	0.0	61.546380383474634	0.04716097727083247	0.0
17905823	0.08859886668639999	0.0		0.0	0.0	0.06492027334850001	0.0		0.0742004696574197	0.0	0.0	0.29867020470600003	0.12227593311664048	0.0
17906117	0.080588493093	0.0008214830340880001		0.0637899434296	0.0	0.0340729001585	0.0		0.08018273664541789	0.7471768860738881	0.0	5.8665402989956	0.03919735776159139	0.0
17907047	0.00250517121006	0.0		0.0	0.0	0.0	0.0		0.00250517121006	0.0	0.0	0.0	0.0038044156168156335	0.0
17908203	0.0187777151782	0.0		0.0	0.0	0.0	0.0		0.06678442500968343	7.35286105392	0.0	26.000000617199998	0.019405957374694482	0.0
17906099	0.0455139978192	0.0		0.0	0.0	0.00985891551929	0.0		0.0455139978192	0.035394263570199994	0.0	1.79810932931	0.14198502108404992	0.0
17906015	0.25539346359799997	0.0		0.0	0.0	0.0	0.0		0.07105963501932876	0.035394263570199994	0.0	3.4708745647287	0.19502939206819625	0.0
17905893	0.000287333282294	0.0		0.0894081137958	0.0	0.00026546323334200004	0.0		0.0003376531640746266	0.005008247972	0.0	0.2755407384248	0.04247935862153364	0.0
17905973	0.033358431994	0.00114006335571		0.170889496687	0.0	0.00246337352522	0.0		0.029458003046365457	0.34526008636371003	0.0	1.74831142734885	0.0386262978290894	0.0
17905917	0.0557987655382	0.0		0.787163691799	0.0	0.0	0.0		0.0557987655382	0.0336724330845	0.0	7.408417567272	0.13412563667237282	0.0
17907071	0.00543173592136	0.0		0.0	0.0	0.0	0.0		0.00543173592136	0.0	0.0	0.0	0.014609793700914303	0.0
17908437	0.0064303462745	0.0		0.0	0.0	0.00936914428482	0.0		0.03032442910721221	0.0	0.0	0.0	0.009821215733018248	0.0
17905803	1.0	0.0		0.0	0.0	1.0	0.0		0.10572658803165152	0.0	0.0	0.29867020470600003	0.11763043887727476	0.0
17908457	0.00924490962154	0.0		0.0	0.0	0.0	0.0		0.00924490962154	0.0	0.0	0.0	0.0042584434654919226	0.0
17906555	0.00689700028488	0.000174199929461		0.0691138220136	0.0	0.00113464447806	0.0		0.00689700028488	0.008753546455410998	0.0	0.4330174746579	0.00897272292230304	0.0
17906353	0.0006182797962239999	0.0016800933663		0.102605702014	0.0	0.0326177864511	0.0		0.04775663520908153	0.003060170060049	0.0	0.2517739916076608	0.017550376079497932	0.0
17906623	0.09375959303860001	0.00160307342594		0.00908408274699	0.0	0.0909090909091	0.0		0.015148911309365697	1.69596927189719	0.0	61.55546446622162	0.047526591254471534	0.0
17905909	0.06796806579180001	0.0		0.0	0.0	0.00161748100223	0.0		0.06796806579180001	0.0005400300105980001	0.0	0.0622834612223	0.00238481129891365	0.0
17906393	0.09849550978039999	0.0		0.0	0.0	0.184210526316	0.0		0.07081952299099595	0.0	0.0	0.0	0.21510499382376191	0.0
17906937	0.0158848206649	3.5716653655999995e-05		0.0829340697892	0.0	9.79623824451e-05	0.0		0.0158848206649	0.000964349648712	0.0	0.15611749313032	0.015303060612131825	0.0
17907027	0.007998689590239999	0.0		0.0262160237835	0.0	0.0	0.0		0.007998689590239999	0.0020358492583879995	0.0	0.3519519051259001	0.0022041853590233826	0.0
17906109	0.00413314570908	0.0		0.0	0.0	0.0	0.0		0.00413314570908	0.0	0.0	0.0	0.007706093189967197	0.0
17905777	0.0440969940904	0.00373922009021		3.96918212576	0.0	0.000624951175689	0.0		0.04078980193790322	0.00373922009021	0.0	4.509499428796	0.03997447467979085	0.0
17906001	0.048931134140800005	0.0		0.0	0.0	0.0	0.0		0.048931134140800005	0.0	0.0	0.0	0.0015801231406295721	0.0
17905947	0.0484117750842	0.0		0.0109806102155	0.0	0.00327868852459	0.0		0.02847335422963881	0.34412002300800004	0.0	1.5837222807854998	0.12693974556130158	0.0
17908471	0.165439977522	0.0		0.0	0.0	0.0	0.0		0.10137068081348063	0.0	0.0	0.0	0.0005638567803781607	0.0
17906923	0.00222416608828	0.0		0.0	0.0	0.000760571950106	0.0		0.00222416608828	0.0	0.0	0.05236061425969999	0.01964525475230336	0.0
17905775	0.0490924494195	0.0		3.99348705634	0.0	0.0	0.0		0.0490924494195	0.00233701255638	0.0	4.673557710247	0.03667686632853793	0.0
17905931	0.024594492144	0.000180010003533		0.0009000500176630002	0.0	0.034188034188000004	0.0		0.05783323120824242	0.0032401800635819995	0.0	0.24799378153347384	0.01929614077185655	0.0
17908223	0.000487391608202	0.0		0.0	0.0	0.00523560209424	0.0		0.0024046864137880963	0.0	0.0	0.0	0.032669983416277554	0.0
17865254	0.0099813790374	0.0		0.0	0.0	0.0234346393263	0.0		0.008872539218043806	109.397747091	128.609467596	903.762042625	0.06403529004727151	0.025425895667834326
17906981	0.005852953397369999	0.000319709011819	0.000319709011819	2.1996103220200003	0.0	0.000114942528736	0.0	0.00016798677899188108	0.005852953397369999	13.72277087755402	9.113697364418119	171.46209210526	0.04938500812254348	0.05361880809348278
17864360	0.0	0.0		0.0	0.0	0.310344827586	0.0		0.009928663686446695	109.397747091	128.609467596	903.762042625	0.07162411881456829	0.030178350740646287
17865398	0.8084348166580001	0.010454907082		0.0283153733471	0.0	0.469879518072	0.0		0.07611323747782342	114.662361944772	77.57362176957989	1411.4474095561468	0.06899796732666352	0.014947073845328325
17882922	0.046562174258199994	0.0		0.0	0.0	0.00127795527157	0.0		0.019450812081131776	0.0	0.0	0.0	0.00046950561059232697	0.0
17906971	0.03659326147459999	0.0		15.191939337200001	0.0	0.000172681747539	0.0		0.03659326147459999	65.67095818326237	68.52419402462755	235.068390475681	0.09747088475596467	0.09586112789660893
17865256	0.000351895988646	0.025608193944200004	0.0189012860064	3.79528705397	0.0	0.0168763424363	0.0	0.015887188974034357	0.0013607985208076805	0.050411731892370006	0.03794042901427	9.07911655402687	0.01806949429831006	0.016087545887204874
24604479	0.06947261318680001	0.0		0.0	0.0	0.0	0.0		0.06947261318680001	0.0	0.0	0.0	0.01431370414714404	0.0
17899285	0.00769745134746	0.0		0.000157888993272	0.0	0.0169366715758	0.0		0.3711625344624365	0.1385834402681	0.0	53.19239238349327	0.03939345570628209	0.0
17861956	0.0272908006162	0.0	0.0	0.0	0.0	0.0205319645357	0.0	0.032425963410094995	0.02550300284602668	0.0	0.0	0.107345929428	0.09014415766116944	0.02285157477633829
17906973	0.00487880578271	0.0		0.758349776035	0.0	0.0	0.0		0.00487880578271	2.4545904328805603	8.368360465146672	20.873763526326	0.03596938775511554	0.035961165816750906
24604459	0.133909566565	0.0		0.0	0.0	0.0	0.0		0.133909566565	0.0	0.0	0.0	0.005168096329051511	0.0
17899397	0.00421651932054	0.681375847696		20.2803694149	0.0	0.0312284603579	0.0		0.004623486813759627	0.79156276162	0.0	35.6703951132	0.029505303843422682	0.0
17870440	0.0	0.0		0.0	0.0	0.5	0.0		0.0013279625897465385	0.0	0.0	0.00403318515964	0.0387434106201282	0.022592776492855918
17900851	0.00245071695674	0.0		0.25569887337	0.0	0.0	0.0		0.00245071695674	0.00225184019655	0.0	0.939763461647	0.0018089596708388879	0.0
17861760	0.0529336578044	0.0	0.0	0.0	0.0	0.14285714285700002	0.0	0.14532545261396862	0.006480546482201692	0.0	0.0	0.0	0.027638762511401068	0.02639996705443037
17862970	0.0	0.908817194402	0.383212789893	9.51344748586	0.0	0.0882352941176	0.0	0.05343473928851943	0.005717623914910054	46.96760987658701	9.390192455569	287.28635435187	0.10545805828386508	0.05783083634532499
17862882	0.000117811179249	6.69679548492		7.23676329992	0.0	0.0166248431619	0.0		6.635725078547915e-05	36.01877317312	7.56100007077	118.18007585392	0.01611780455152276	0.0008289111831504619
17862840	0.00028422723720899996	0.616286317294		5.257954036	0.0	0.0152422427872	0.0		0.00015500845841924144	36.8946545695868	7.56100007077	123.70912504618231	0.016115386164935918	0.0006236620742651334
17862478	0.00194424493377	0.0	0.0	0.0	0.0	0.0282889316122	0.0	0.02163147543562372	0.0012094233460310767	0.0	0.0	0.389303075877	0.023221765830259374	0.018747003257901133
24604471	0.0817743570152	0.0		0.0	0.0	0.0	0.0		0.0817743570152	0.0	0.0	0.0	0.020875734139669224	0.0
17863324	0.009112636813809999	6.38632310361		25.526070579699997	0.0	0.016523400190999998	0.0		0.012882785274396263	47.522862976257	31.574528963799	202.74239210097	0.03337989499545856	0.014739821332726069
17906261	0.06550359554190001	0.0		0.0	0.0	0.0138248847926	0.0		0.009486940461802065	0.0	0.0	0.13230735259610002	0.0556760665220987	0.0
17906963	0.0	0.0015985450590999995	0.00255767209455	0.579898353084	0.0	0.0027670171555100004	0.0	0.004254242616504714	0.0020901252769274167	2.4561889779396604	8.370918137241222	20.695312103375002	0.04606741573035512	0.046488436021083636
17899439	0.17452151110199998	0.0		0.0	0.0	0.0236966824645	0.0		0.03252658148432315	0.06743278441719999	0.0	0.995354131796	0.051612558164455764	0.0
17864358	0.004721879773850001	0.0		0.0	0.0	0.0130111524164	0.0		0.00434361204472855	0.0	0.0	0.0	0.015062161300608359	0.0
17906745	0.07344075147939999	0.00106871561729		0.532347965815	0.0	0.00100044464206	0.0		0.07344075147939999	0.41335895117688	0.0	3.0313755715611	0.007361905655061383	0.0
17862972	0.0224856858096	0.287255678326	0.233331345022	41.2991345339	0.0	0.028328611898	0.0	0.02493338171918893	0.01947596244514361	72.01208007065601	18.376290936452	439.6758072868	0.09398016301687187	0.04193224866944726
17863356	0.00278822345332	0.0		0.0	0.0	0.0053010850658500005	0.0		0.004716097200846154	0.000205044081667	0.0	0.0836579853203	0.01490860377684503	0.0
17862554	0.009292276606530002	5.685520759169999	0.14042524161800002	13.381496159800001	0.0	0.0386323268206	0.0	0.019871430090281327	0.005755913298356062	16.864386862470006	6.803314264928	69.9769995034	0.043438827629006686	0.02558171981533861
17907029	0.021216500610599997	0.0121489424491		3.93593764451	0.0	0.00216210222863	0.0		0.021216500610599997	0.015665741579119	0.00255767209455	4.8163624687035975	0.002270299145301125	0.00034221048824893235
17862080	0.010187644480600002	0.0	0.0	0.107345929428	0.0	0.114691605189	0.0	0.01947534437695141	0.01471139907238223	0.0	0.0	0.1428407311328	0.09830253069199092	0.021415934833453533
17864396	0.040768354569099996	109.397747091	128.609467596	903.762042625	0.0	0.07688155459589999	0.0	0.03400184166190491	0.03825735991406692	410.47230470230005	185.065336827	1486.7240715070002	0.11953352769679115	0.0456368467807033
17908447	0.0165302611846	0.0		0.0	0.0	0.000188075982697	0.0		0.0165302611846	0.0	0.0	0.0	0.0025855616792560053	0.0
17864316	0.00330882397564	0.0		0.0	0.0	0.00467139175258	0.0		0.0021031693615514648	0.0	0.0	0.0	0.009116844455476456	0.0
17908463	0.0395777526117	0.0		0.0	0.0	0.0	0.0		0.0395777526117	0.0	0.0	0.0	0.00013121637580353374	0.0
17908451	0.06777804659850001	0.0		0.0	0.0	0.000204519889559	0.0		0.057670566868156976	0.0	0.0	0.0	0.001537188128179341	0.0
17863318	0.0006865425677359999	0.534190368446	0.5071246692679999	2.71666104695	0.0	0.0292282430213	0.0	0.02056944442208148	0.00036814981922962176	6.2247846809892176	0.6506906820217999	17.060183709061004	0.03894102815520482	0.022551286989715005
17906991	0.0018109775627700002	0.0		1.4003254717700002	0.0	0.0	0.0		0.00181097756277	2.497548297953	1.54937242984	33.21026512068	0.014738314238050504	0.012652407780946104
17910101	0.419975240813	0.0		0.0	0.0	0.0	0.0		0.03292108979187985	0.0	0.0	0.0	0.0031940008332216234	0.0
17908259	0.0265128249508	0.0		0.0	0.0	0.0543352601156	0.0		0.022734796877432788	0.0	0.0	0.0	0.012314765403723962	0.0
17900419	0.056746930041199996	0.13870939656		0.959358366235	0.0	0.0429505135387	0.0		0.008022921273037635	6.79555746418	0.0	267.648892501435	0.0437629962475216	0.0
17900437	0.10895222138	0.06743278441719999		0.577443693765	0.0	0.0412444025454	0.0		0.06003600086257644	0.4873762537317	0.0	22.270956411285	0.0670221313271483	0.0
17864424	0.39594204898400004	281.22374789099996	44.6434077516	482.03451651800003	0.0	0.24032232580200005	0.0	0.06825244541252924	0.2850155037790973	318.98787811197565	67.1011302572258	1741.6194770207358	0.14133962820895055	0.053310050140313314
17862548	0.0451275971411	0.017529522417999998	0.004557859763739999	0.0295420452603	0.0	0.230769230769	0.0	0.12170007406125205	0.012866122018364677	0.0500409795204	0.02135544593334	18.3044648086603	0.01903160726292613	0.012319700836767906
17906601	0.0	0.000696799717844		0.008405146596489999	0.0	0.0462427745665	0.0		0.02883999893605556	0.006009897566404	0.0	3.5991621364164903	0.029946443388392682	0.0
17861714	0.0	0.0	0.0	0.0	0.0	0.6875	0.0	0.7158451610529457	0.00012703880999825196	0.0	0.0	0.0	0.075445429684221	0.024680620242878492
17864266	0.15322428306299998	0.000205044081667		0.0836579853203	0.0	0.0715255771842	0.0		0.018689720705690242	0.26423341667371697	0.0	1.6671286385673	0.11651552624339785	0.0
17908211	0.00445462747329	0.0		0.178571436554	0.0	0.0909090909091	0.0		0.02157431583831749	0.0005714664584959999	0.0	0.6056475175203999	0.026130205626894533	0.0
17862502	0.0141542627327	0.00804381503258	0.00804381503258	0.00804381503258	0.0	0.0141388174807	0.0	0.00965199458694815	0.0037900844341409562	0.27358870918397005	0.21421851339992806	22.176898727314978	0.02564242755602156	0.017680015300198762
17864256	0.0107273860023	0.0		0.0815468809451	0.0	0.000854179377669	0.0		0.009291896812021869	0.0	0.0	0.0815468809451	0.002555003548616103	0.0
943020360	0.0005478169716159999	0.0	0.0	0.0354948017048	0.0	0.0188387893762	0.0	0.01975898682750404	0.0011782791138074179	0.0	0.0	0.0354948017048	0.0206192067595626	0.025008131538396164
17899283	0.18188274635600002	0.053366479725800005		0.0637871532817	0.0	0.391340549542	0.0		0.4972219350166793	0.23947450696870004	0.0	53.310019683480604	0.06511028074466167	0.0
17864478	0.03079666625	3.92000327366	0.0115450741723	29.169863280700003	0.0	0.055065712859800005	0.0	0.004482966308085676	0.024765463155898945	22.03944677105	9.4979669415623	74.4182093671	0.034687135639375144	0.011731379499878354
17899461	0.0290548976093	0.00225184019655		0.684064588277	0.0	0.00276602668402	0.0		0.019849641614346544	0.06968462461375	0.0	1.679418720073	0.027330195023558573	0.0
17862570	0.0319990803811	24.941248833099998	21.0667257404	40.4436965132	0.0	0.0198970363156	0.0	0.012753570513995869	0.018428198342841727	82.09391713214698	74.542978269899	279.20671515727	0.03918418351413842	0.02663009380955496
17899343	0.0349571468469	0.203655358637		19.5272419902	0.0	0.0149597238205	0.0		0.015193346431786615	21.36773508322092	0.0	143.666644131344	0.022393362213222308	0.0
17864362	0.0107801334594	0.0		0.0	0.0	0.0276327909119	0.0		0.002600999679773746	109.397747091	128.609467596	903.762042625	0.07138697632991882	0.030208329577061824
17899345	0.0	0.0		0.0	0.0	0.0	0.0		0.0027390572060250304	0.0	0.0	0.0	0.00186990784025512	0.0
17908191	0.000292275497964	0.0		0.383119432954	0.0	0.0	0.0		0.000292275497964	0.013824828594802002	0.0	1.1002040470336	0.012611275964394951	0.0
17906817	0.0742538737163	0.147778731938	0.14503719764599998	6.5217216243300005	0.0	0.246539222149	0.0	0.2389427062846439	0.11714864477056974	16.5869255867643	7.0906938477704005	71.7716265057747	0.26899712633212164	0.2313735120532045
17862756	0.0	0.0	0.0	0.0	0.0	0.0422984836393	0.0	0.04898562241245416	0.0011900873720831378	0.01806646664045	0.01917321683141	1.65178346833671	0.03311415669807313	0.03208916120636398
17865646	0.00272657790996	9.41187974758	0.502268983517	122.19992362299999	0.0	0.0740771123872	0.0	0.014862373948813037	0.0011549442185840714	11.801863879369998	2.635824746219	237.41248145887297	0.19015522875818214	0.13391154145632822
17906873	0.169714675557	0.0393096652842	0.0419993925607	16.2144043599	0.0	0.16960966542800002	0.0	0.1813246295045805	0.06315687245753705	6.36544702244162	3.49663616154122	112.71037414012044	0.08634210900498585	0.07282527855362815
17862462	0.502380871219	0.0	0.0	0.0	0.0	0.5714285714289999	0.0	0.2240889097619794	0.001300043506138952	15.43919506437	8.90077393688	69.33909016829999	0.05466182321397229	0.032397538509913906
17864364	0.0145691800032	0.0		0.0	0.0	0.018989487962	0.0		0.009046479680976306	0.0	0.0	0.0	0.01683400015097435	0.0
17864398	0.23966903015799998	106.742271109	58.8640100078	1045.94563398	0.0	0.08093269603410001	0.0	0.01647531462126911	0.20028446437764494	407.8168287203	115.3198792388	1628.907662862	0.1418240785379591	0.039075364196174
17863790	0.00203989001751	0.0		0.0	0.0	0.027508596436400003	0.0		0.0011012755321938216	0.0	0.0	0.00403318515964	0.0363257206282849	0.01773089549318244
17900333	0.11336050516599999	25.7093509897		129.407256719	0.0	0.0619994476664	0.0		0.05124948607096295	25.903072991726	0.0	466.360215874	0.048111179813346984	0.0
17862454	0.010539464589899999	11.178866103299999	6.66288902331	56.595503343599994	0.0	0.044641259617099985	0.0	0.027820223964751475	0.01084727771876935	72.58275490951718	42.30736431584578	428.0741083968856	0.06952595936794903	0.04232032102780172
24604453	0.0744908659217	0.0		0.0	0.0	0.0	0.0		0.0744908659217	0.0	0.0	0.0	0.0044620267721591535	0.0
17862312	0.0	0.0	0.0	0.0	0.0	0.109375	0.0	0.1017223748178417	0.0006227540369385786	0.0	0.0	1.4537383429700002	0.02179230598172674	0.01522747009780096
24604475	0.138648290196	0.0		0.0	0.0	0.0	0.0		0.138648290196	0.0	0.0	0.0	0.01890791455183734	0.0
17863026	0.0	0.122228156775	0.119616755517	33.5479308327	0.0	0.0296735905045	0.0	0.028093686167046654	0.0	0.43455232668146	0.42239727929648996	66.576798627841	0.043380492832391336	0.035721366981005594
17906311	0.184714622847	0.0		0.0	0.0	0.209414024976	0.0		0.10811781816914352	0.0	0.0	0.29867020470600003	0.12646430098323433	0.0
17862856	0.009467408878299999	0.00386556447484		0.366020636211	0.0	0.0028303555634200004	0.0		0.006963024894886398	3.0726618063354403	0.0	32.718583393291	0.014366021236726218	0.0
17864370	0.00150204261486	0.0		0.0	0.0	0.0140480591497	0.0		0.0003615112797576564	0.0	0.0	0.0	0.019711842938590487	0.0
17908441	0.00901174155715	0.0		0.0	0.0	0.0	0.0		0.00901174155715	0.0	0.0	0.0	0.003185261707991182	0.0
17863350	0.0383712949771	19.8196934703	5.3403959201	155.637504957	0.0	0.0745274914089	0.0	0.0204426103693174	0.042871127702566944	20.2904451395574	5.800701984325199	204.27567268915	0.05487371042332512	0.030587200244677062
17899347	0.00902754588255	0.5880611632020001		5.42613976332	0.0	0.0174607133949	0.0		0.006759206498156146	20.848665807402	0.0	114.62997741931999	0.03863417762106891	0.0
17899337	0.0390638090717	0.0041088773869		0.0349254577886	0.0	0.16404494382	0.0		0.0004912637986312609	0.6949865040401	0.0	20.3910522995095	0.032396345119547316	0.0
17900399	0.037053786951099996	2.0212930849		60.4183903025	0.0	0.0904479160662	0.0		0.0531129794801162	2.03034426298725	0.0	61.86753833251	0.06773753937581965	0.0
17862298	0.00047962917367499997	0.0	0.0	0.0	0.0	0.0746500777605	0.0	0.08183220019406791	0.023074894255533385	0.0	0.0	1.4537383429700002	0.024164661855081003	0.01808882339431643
17864476	0.0258362619866	0.752036526232		5.601734842130001	0.0	0.027693856999	0.0		0.02085377111892857	22.791483297282	9.4979669415623	80.01994420923	0.03407177669476792	0.010699101268298452
17861712	0.0	0.0	0.0	0.0	0.0	0.235741444867	0.0	0.1992952881890448	0.0005476066838866393	0.0	0.0	0.0	0.0788645579886063	0.028405166688121125
17908907	0.201556203616	0.0		0.0156657415791	0.0	0.0	0.0		0.10199127163263293	0.00319709011819	0.0	2.9937551866771	0.0014217798906992535	0.0
17907113	0.023360587808300002	0.0		0.0	0.0	0.0	0.0		0.0233605878083	0.0	0.0	0.786484169075	0.011916583912621187	0.0
17864464	0.0384350730786	0.922205562209		25.5741428673	0.0	0.0207279827767	0.0		0.03692791992752927	14.318503490071	3.3370620870223	74.18866095063002	0.02956124549663557	0.002745292689955255
24604493	0.000490600500147	0.005008247972		0.186132624629	0.0	0.054761720862	0.0		0.000414557477256848	0.005008247972	0.0	0.186132624629	0.05476172086199999	0.0
24604487	0.0548691667209	0.0		0.0427823775062	0.0	0.0050454086781	0.0		0.0548691667209	6.00033345108e-05	0.0	0.8655844768292429	0.06774368721152096	0.0
17862740	0.00142848537004	0.0	0.0	0.0	0.0	0.0260591526779	0.0	0.029998539310954142	0.0035633788624934064	0.01806646664045	0.01917321683141	1.65178346833671	0.03077656531412447	0.03139645859190331
17906875	0.0466609370255	1.9834732106	1.76795720449	26.4170109974	0.0	0.25381485249200003	0.0	0.2420054852939429	0.04875230219023709	4.93096893505803	2.1576392568994303	95.33629204379284	0.1946754446753276	0.14987802228412214
17899375	0.07314705669180001	2.27207811456		93.77071230620001	0.0	0.047268047268000005	0.0		0.07132084171542315	6.65684806762	0.0	266.6895341352	0.04380683678867826	0.0
17863302	0.00297509885791	0.00437588326167		0.270831855771	0.0	0.0127564377172	0.0		0.02186241752714892	0.21444194299667	0.0	0.674791219972	0.013886411700273866	0.0
17908439	0.0107364765411	0.0		0.0	0.0	0.00877280430665	0.0		0.02276226788419506	0.0	0.0	0.0	0.011638573558082387	0.0
17861698	0.0	0.185887847154	0.0	0.912616806163	0.0	0.251814223512	0.0	0.07620293122407515	0.006322695600590716	0.185887847154	0.0	0.912616806163	0.08264580821217736	0.029450183498594962
17862898	0.00043117583728099996	0.009986337390729998	0.009986337390729998	1.49437960114	0.0	0.0291384469995	0.0	0.02381331562886837	0.004863095806859421	0.14321391313577994	0.13765823270654998	23.57658878884804	0.03341740226986637	0.028800100619275324
17864328	0.0	0.0		0.0	0.0	0.00406123086535	0.0		0.004181564920638983	0.0	0.0	0.0	0.012572830420122704	0.0
17906525	0.0	0.0		0.0321265915991	0.0	0.0	0.0		0.0	71.14903050576922	0.0	294.6737355809643	0.05629568497996981	0.0
17906305	0.0	0.0		0.0	0.0	0.0	0.0		0.04059053073404476	0.02804415067653	0.0	0.7576594707790001	0.02300584574766949	0.0
17896403	0.00119978536643	0.0		0.0	0.0	0.013704406493799998	0.0		0.0019225913126337075	0.0	0.0	0.0	0.020379785338729355	0.0
17862442	0.00457214084079	2.00107965118	0.8516480426620001	58.1758487598	0.0	0.137440758294	0.0	0.05817068428317752	0.014066038089015154	43.592297969414	44.445724082987006	160.83091627675	0.03234094616639472	0.021442705324871882
17899321	0.0346162621415	1.59549313629		52.41497611720001	0.0	0.022224546357800003	0.0		0.06480031248681345	2.505045223337	0.0	69.1159251235	0.03342408009132601	0.0
17906851	0.602124831149	1.33458104485	1.3266610569	1.33488565977	0.0	0.994923857868	0.0	0.8658549910052252	0.0928619426954008	18.501914758708946	9.21810904635698	47.77424015841694	0.3178520625890193	0.2619723463899705
17907081	0.26059384383	0.0		0.0	0.0	0.0	0.0		0.26059384383	0.0	0.0	0.0	0.0	0.0
17906931	0.266066831777	0.00287738110637	0.00255767209455	0.214090273541	0.0	0.110516934046	0.0	0.036928834322546455	0.056860055073410826	65.67095818326237	68.52419402462755	219.87645113848097	0.13018988444365956	0.12809687446470966
17899403	0.011992935835	0.053119598160300006		2.60622267038	0.0	0.128013105546	0.0		0.018234084436494748	0.3740531655784001	0.0	22.70685951554	0.09204196099594232	0.0
17905809	0.149044509219	0.0		0.0	0.0	0.214285714286	0.0		0.10237219696645264	0.0	0.0	0.29867020470600003	0.11835930167063162	0.0
17899409	0.0389576016114	0.058462989691199986		1.34348717384	0.0	0.0314898950337	0.0		0.0789047630450095	0.4199434693145	0.0	21.693512717519997	0.0755200745877165	0.0
17863014	0.0	0.0883460103069	0.08573460904880001	6.4435991433	0.0	0.0430797433547	0.0	0.038791030655186236	0.027923843296870518	0.5191945452238	0.5061375389335999	49.87899752544099	0.04043702122316782	0.035790530970554936
17907121	0.0904857812984	0.0		0.0	0.0	0.0	0.0		0.0717545295788723	0.0	0.0	0.0	0.002374983507062598	0.0
17862480	0.0008484057175389999	2.26506343469	0.520593471156	2.85241587236	0.0	0.0196543991558	0.0	0.00760986417188463	0.000533623475040501	8.48984811567922	1.1712841531778	20.101937509196	0.029642499868372155	0.015467929328472674
17906857	0.0677045181365	0.5027442225550001	0.0101092004625	0.502900171792	0.0	0.947368421053	0.0	0.4212250643474416	0.04715013840655562	6.868191244996622	3.5067453620037203	113.2132743119124	0.0906152389451695	0.07455432856638328
17865648	0.051391517408	0.0	0.0	0.0	0.0	0.694444444444	0.0	0.4086106122561723	0.002869873985694455	2.3899841317900004	2.133555762702	115.212557835873	0.7566052842274669	0.7148600410226253
17907019	0.0	0.0		0.409866953152	0.0	0.0	0.0		0.0	0.0035167991300189987	0.00255767209455	1.8974191907906	0.0012889366272842654	0.0008257160481228808
17899181	0.025151106587799996	0.193722002026		336.952959155	0.0	0.0234534608156	0.0		0.024650899797963158	0.5317374532388869	0.0	375.764358801704	0.05207547169816228	0.0
17899357	0.0109199914763	20.2606046442		109.203837656	0.0	0.0444066643999	0.0		0.00783675608522938	25.99477363026001	0.0	294.79057478970003	0.044423343427644084	0.0
17864406	0.0	0.00121943780687	0.00121943780687	0.00121943780687	0.0	0.235294117647	0.0	0.206601738068704	0.0	0.02480353794817	0.01903914300787	5.28382950005687	0.0188579771270656	0.016219949808857624
17900405	0.0100060393418	0.0		0.0	0.0	0.00219849246231	0.0		0.009017613717602943	0.2945169801826	0.0	23.57263328787	0.006181777678774627	0.0
17908435	0.0806951005084	0.0		0.331857954268	0.0	0.0	0.0		0.08788646661397294	0.00319709011819	0.0	2.978089445098	0.0014374270056584358	0.0
17906523	0.002317615956	0.0106382975355		0.555589346681	0.0	0.00500500500501	0.0		0.01079302247342054	71.1596688033047	0.0	295.19719833604626	0.04723379517489718	0.0
24604443	0.0493000793264	0.0		0.0	0.0	0.0	0.0		0.0493000793264	3.5716653655999995e-05	0.0	0.001750116029142	0.0008424599831497945	0.0
17906939	0.009022204389569998	0.0227665744023		0.8209201603899999	0.0	0.0200433369447	0.0		0.013241733424501457	7.182757315301241	6.398911159906981	29.59306751470693	0.22651356993730684	0.20778896813330908
17906867	0.178870250562	0.00682254708954	0.00624150854128	0.251324471246	0.0	0.833333333333	0.0	0.7779835039201579	0.06391399942288488	6.318863091057841	3.4471973289660798	96.7331974382773	0.08251321356028589	0.06839494683301177
17863314	0.0007663023670830001	0.210066059735		0.403959364201	0.0	0.0151880688672	0.0		0.0019486756816238426	8.493808830225001	0.815387536415	43.475527796501	0.017723880596996217	0.001188050753069946
17862368	0.000146166270189	8.283742770489999	0.815387536415	43.0715684323	0.0	0.0199960695686	0.0	0.002252591857250435	0.00016384973058701247	50.17352130419	48.952919275815	698.2893306282999	0.03250780108225139	0.0211952069041359
17906907	0.334724977146	3.04455998939	2.2927905088900005	19.741087781199997	0.0	0.30289017341	0.0	0.18024220391638804	0.04044343603812723	21.54647474809894	11.510899555246981	67.51532793961694	0.31698492462320005	0.2572355575631934
17908209	0.0049716787488999995	0.0		0.358071506103	0.0	0.0161073825503	0.0		0.01647558283492945	0.0005714664584959999	0.0	0.4270760809664	0.02591792656586696	0.0
17899447	0.00295410165424	0.0269158873707		1.4308201534399998	0.0	0.0252227111731	0.0		0.0016501630917871767	0.03448598069371	0.0	1.5906332347039998	0.06767646934724958	0.0207720187399032
17861906	0.0160314314703	0.0	0.0	0.0	0.0	0.0515039142975	0.0	0.045062078344327926	0.010270535552077431	0.0	0.0	0.107345929428	0.08833191620944908	0.023893255462732167
17905845	0.0878911488646	0.0		0.0	0.0	0.0743034055728	0.0		0.07591820975180379	0.0	0.0	0.0	0.1333406256835507	0.0
17863292	0.000691780852743	0.0	0.0	1.4537383429700002	0.0	0.0244068953746	0.0	0.015297980264518344	0.0004005355792627616	0.0	0.0	1.4537383429700002	0.023228064593084918	0.01664194066759891
17862498	0.116829900121	40.7614641936	25.7287839421	60.5278764145	0.0	0.23381294964	0.0	0.10912934422383824	0.024843591600437327	41.035052902783974	25.94300245549993	82.70477514181499	0.0347207697134174	0.02166813181987641
17900441	0.00343599570372	0.110186913924		15.390025698299999	0.0	0.0251509521598	0.0		0.0039952173804706686	0.1844469982318	0.0	23.253733387929998	0.02575611666966153	0.0
17896409	0.0100152574143	0.0		0.0	0.0	0.0220330495744	0.0		0.006119991537362474	25.7093509897	0.0	129.407256719	0.043779377937801074	0.0
17899309	0.117488974854	0.045610775298		12.2393912882	0.0	0.0143837548181	0.0		0.08161111896052717	2.066903860198	0.0	72.6577815907	0.07753916844827917	0.0
17862542	0.027029444956299997	0.06454337059399999	0.056530520058	0.7304440637240001	0.0	0.0694063926941	0.0	0.04937527650129999	0.006702548746943282	0.11877473202179	0.07833083914014799	19.0480419003244	0.023143804341011518	0.015262035436942788
17906307	0.0	0.0		0.035522590857	0.0	0.097192224622	0.0		0.06986221414293735	0.02804415067653	0.0	0.7931820616360001	0.02614201718677237	0.0
17862778	0.00970943364064	0.00189728604164	0.0023716075520500003	0.00537564378465	0.0	0.0948275862069	0.0	0.11479364961178007	0.002623865584890483	0.01806646664045	0.01917321683141	1.65178346833671	0.032102022867171	0.0302271325439866
17865278	0.00022389959717500002	0.0235841001413	0.017819705201	5.28261006225	0.0	0.0187086563045	0.0	0.016088604068002246	0.0001899569609554185	1.7608916291553	2.160891961597	24.552105425342003	0.02722184716563909	0.02571960287229787
17906985	0.0142276424842	0.0		0.13875371113	0.0	0.0	0.0		0.035739163368951526	0.006394180236389999	0.011189815413670002	2.0822181853016	0.007835662854741784	0.010885079430000513
17862472	0.004321562759060001	0.633841058734	0.625626734225	0.66467388095	0.0	0.0275951557093	0.0	0.016089272986927732	0.003106621204113545	9.12368917441322	1.7969108874028	20.766611390146004	0.02886786894902301	0.015703020242351522
17862452	0.0658369081874	9.55158828804	86.5859890772	175.16191495599998	0.0	0.0242098184264	0.0	0.08695460645916488	0.0119554106664283	70.95547709425718	122.23046436973577	546.6405200092855	0.07643369990005308	0.07514733477678716
17908455	0.0	0.0		0.0	0.0	0.0	0.0		0.0	0.00319709011819	0.0	3.0340385221663	0.0013614703880177033	0.0
17899333	3.3304228542e-05	0.00905117808725		1.44914803001	0.0	0.0362050105387	0.0		0.02155408058926496	0.70403768212735	0.0	21.8402003295195	0.03335299084588299	0.0
17862922	0.0220911153691	0.0		0.151723405637	0.0	0.0	0.0		0.0220911153691	0.0041071622545170005	0.0	0.876999940228	0.0011671014691755322	0.0
17863214	0.010512462480600001	0.0	0.0	0.0	0.0	0.0209994878174	0.0	0.019714700548044497	0.008216903382312235	0.0	0.0	0.0	0.027190089292926455	0.025351631397153414
17910107	0.0	0.0		0.0	0.0	0.0	0.0		0.005040327428173693	0.0	0.0	0.0	0.03255660221453538	0.0
17906587	0.011051967975	0.0008265328069680001		0.0131811061292	0.0	0.0623229461756	0.0		0.03096764064860891	0.006879980355737	0.0	1.9594385063141389	0.04044680659398462	0.0
17907125	0.239027851944	0.0		0.0	0.0	0.0384615384615	0.0		0.06823215113077773	0.0	0.0	0.0	0.003363700070080997	0.0
17908255	0.16534771372600002	0.6064418348830001		4.78352729761	0.0	0.0487804878049	0.0		0.01476824766687041	8.531711160763	7.46277865628	42.75619276881	0.028753993610190324	0.023740277879465515
17862558	0.0	0.00507355337322	0.0031407711358000003	0.962026502311	0.0	0.0408441116406	0.0	0.02449622519313143	0.0005247874463545961	5.69059431254322	0.14356601275380002	14.343522662111	0.04157393394464131	0.023088517526387683
17864366	0.0072544566390100014	0.0		0.0	0.0	0.0157627571467	0.0		0.004353759619666769	0.0	0.0	0.0	0.02289648546957017	0.0
17906989	0.00768738459357	0.000319709011819		0.200777259422	0.0	0.0010775862069	0.0		0.01995430902883627	0.006713889248208999	0.011189815413670002	2.1442417335936	0.006385068762294877	0.00841508596405737
17862236	0.0272674863609	0.0	0.0	0.0	0.0	0.0115195443955	0.0	0.020897749788017155	0.020775996018176864	0.0	0.0	1.4537383429700002	0.02391713747642064	0.022163586723012246
17866148	0.0	0.0	0.0	0.0	0.0	0.0306985021504	0.0	0.013014054569250977	0.0007875937681509251	0.0	0.0	0.00403318515964	0.03870387038701518	0.022594713210227043
17862966	0.0032556212595999997	0.786196131259	0.295883730054	4.37888263911	0.0	0.164122137405	0.0	0.07356190141459723	0.008376734366436727	46.05879268218502	9.006979665675997	277.77290686601003	0.10699877214543237	0.05822410235110834
17908909	0.0958485644225	0.0		0.0	0.0	0.0	0.0		0.05016373465102804	0.00319709011819	0.0	3.0340385221663	0.001373390557938545	0.0
17862492	0.00248512839064	0.0	0.0	0.189337927775	0.0	0.0281690140845	0.0	0.0226880752446146	9.824282613331848e-05	6.2247846809892176	0.6506906820217999	17.249521636836008	0.03627760252364814	0.02068804779605889
17906959	0.0034734052831999996	0.0		1.00804251427	0.0	0.0	0.0		0.0034734052831999996	65.668080802156	68.521636352533	220.67040337921	0.10113193542421857	0.10137498604109373
17862918	0.00465727853361	0.000241597779677		0.35925589838	0.0	0.00016286644951100002	0.0		0.010081269282495198	0.094684329495117	0.0	5.0488407643710005	0.006873666745684433	0.0
17862642	0.00139318170495	0.0325114571024	0.0167975861696	18.2749227634	0.0	0.016407952069700003	0.0	0.010964361244797854	0.0009694939630350225	0.0384718909045	0.022758019971700003	18.448317201279	0.021225662304507183	0.019154765976836786
17907003	0.039716509874	0.0		0.6924897195999999	0.0	0.0	0.0		0.039716509874	0.006394180236389999	0.011189815413670002	2.7747079049016	0.005093612334814249	0.007075901028147359
17899339	0.0028709505016599997	0.0		0.0	0.0	0.00457508864234	0.0		0.0028709505016599997	0.0	0.0	0.0	0.0033271719038797725	0.0
17906313	0.665988710299	0.0		0.0	0.0	0.7021276595739999	0.0		0.1023428487779692	0.0	0.0	0.29867020470600003	0.12876852324977886	0.0
17906885	0.112695249067	0.0266606298683	0.024945188255500003	0.0302474623313	0.0	0.8373626373630001	0.0	0.7344310538421883	0.07175173918878984	3.6872804310783	3.3763994499355	44.060538434531296	0.06895967229320872	0.07113638764311657
17861752	0.00841662519295	0.0	0.0	0.0	0.0	0.07565761288660001	0.0	0.02361118144061373	0.007631565941376444	0.0	0.0	0.0	0.06557853240193527	0.02333418844900411
17908247	0.035831408889699996	0.0182935137127	0.015162785654	0.0182935137127	0.0	1.0	0.0	0.8276425572494119	0.031067195500462795	2.0526628476263	1.8336682547844	26.506724296144696	0.2655905567798343	0.2526065034553189
17906961	0.0028114124154800003	0.00111005996587		0.0727505560499	0.0	0.00399644760213	0.0		0.003748343982338815	3.06843662375817	2.2927905088900005	20.63475849763989	0.05066823322066077	0.022897562988350068
17864538	0.0	0.0	0.265602530941	0.265638547062	0.0	0.0747198007472	0.0	0.08011958071601273	0.0002168334371163801	1.737307529014	2.143072256396	19.269495363092002	0.03708055268351335	0.03687278651439997
17862476	0.017640011897	13.3458747886	9.54901232253	77.2513750655	0.0	0.112399643176	0.0	0.0728737485226133	0.028530358565898136	56.304331699280006	53.369109671292	237.4176174613	0.04775687409558495	0.033098676688901
17906365	0.511556152804	0.0		0.0	0.0	0.642857142857	0.0		0.2336121647210421	0.5185626510067299	0.0	12.426244394787098	0.11095890410963953	0.0
17906895	0.19991634388799998	0.0	0.0	4.75324015459	0.0	0.18932038835	0.0	0.1889486064075832	0.054947807553176485	63.2195648405	60.164465702799994	201.02485429759	0.1372237569063699	0.13589313976615167
17860224	0.0	0.391962609836		1.86392520042	0.0	0.124263839812	0.0		0.0065217241673308024	0.5778504569899999	0.0	2.776542006583	0.14610422852481816	0.04897672494956783
17861726	0.00043493918891199994	0.0	0.0	0.0	0.0	0.05903490759750001	0.0	0.04536328759412999	0.00013857728819113114	0.0	0.0	0.0	0.0751206407640992	0.024313851337419028
24604437	0.0463262604569	0.0		0.0	0.0	0.0	0.0		0.0463262604569	0.0	0.0	0.0	0.0020734938371186995	0.0
17899441	0.00608080745729	0.0		0.417910438031	0.0	0.127308066084	0.0		0.0537455758420508	0.06743278441719999	0.0	0.995354131796	0.05193119117174185	0.0
17862982	0.0005165753795319999	0.00832194782561	0.00798906991258	13.3907071549	0.0	0.0313108371188	0.0	0.027253679183591045	0.00047324430834590556	0.48168501834105	0.47090653539582	62.03148628830803	0.036802129825410736	0.03325361169871125
17863336	0.0	0.00349502131576	0.00349502131576	0.142699900374	0.0	0.0255513717052	0.0	0.023843867259475	0.007652566201252042	0.021803306532099997	0.021470428619070003	15.027786656414001	0.029141765756887573	0.025126850957184928
17863048	0.0059826379721300005	0.0		0.000966391118709	0.0	0.00228546552756	0.0		0.0059826379721300005	0.0	0.0	0.000966391118709	0.0034811165845641105	0.0
17899351	0.0224434223891	0.0095017789572		0.07575742682089999	0.0	0.0599597585513	0.0		0.007392270571028221	0.6908776266532	0.0	20.35612684172089	0.03186996837265883	0.0
17906367	0.0479281129187	0.0		0.17693804967	0.0	0.046017699115000005	0.0		0.21281290039346026	0.5185626510067299	0.0	12.426244394787098	0.11055055933323774	0.0
943020318	0.019441205962700003	0.0	0.0	0.0	0.0	0.0439077936334	0.0	0.04256376501958454	0.012391980778143323	0.0	0.0	0.0	0.027148380659392287	0.03233627759252091
17900343	0.118855247661	0.335206263459		36.6599804833	0.0	0.0320152655571	0.0		0.06594073107988563	1.0657958229138869	0.0	106.00048583220399	0.043932471127729834	0.0
17862262	0.0578961696087	0.00201963842846		0.186944567249	0.0	0.00844533236469	0.0		0.0578961696087	0.0063955216901299995	0.0	0.45777642302	0.011273851534949598	0.0
17907087	0.00995440778561	0.0		1.32775152609	0.0	0.0	0.0		0.00995440778561	0.00351679913001	0.0	4.3170307866	0.0010715561376334446	0.0
17906395	0.0334461527887	0.0		0.0	0.0	0.00713194090678	0.0		0.06236031948922214	0.0	0.0	0.0	0.141869366588344	0.0
17862812	0.0	0.338193118805		21.4631481165	0.0	0.00676378772112	0.0		0.002458008509030566	4.465558061578999	0.0	36.19007334812	0.013552234182629677	0.0
17862800	0.0	0.0026878218923200004	0.00332025057287	0.00932832303806	0.0	0.048867699642400016	0.0	0.06028129226084423	0.0005371715887433901	0.016169180598809996	0.016801609279359996	1.64640782455206	0.029433339446151906	0.02662921727537701
17899437	0.8837760099429999	0.0		0.0	0.0	0.0	0.0		0.030905143550059168	0.06743278441719999	0.0	0.995354131796	0.05150237498003038	0.0
17906363	0.0	0.0		0.107937138935	0.0	0.07291666666669999	0.0		0.06512136658825464	0.5185626510067299	0.0	12.534181533722098	0.10977443609027583	0.0
17899359	0.243268987907	1.349399033		12.667915304700001	0.0	0.0886610373945	0.0		0.06572756350283518	5.734168986059999	0.0	185.58673713369998	0.04443345286678413	0.0
17864352	0.325246434545	0.0		0.0	0.0	0.5	0.0		0.015199996763690963	0.0	0.0	0.0	0.016216741114781434	0.0
24604463	0.046325519188699996	0.0		0.0	0.0	0.0	0.0		0.046325519188699996	0.0	0.0	0.0	0.0006595435958313404	0.0
17864322	0.0328592787828	0.144993509282		0.96546881285	0.0	0.183274021352	0.0		0.11843193207287846	114.918859386912	77.57362176957989	1412.9081298372628	0.07559839705404438	0.014335678680638012
17862644	0.00154420256138	0.0	0.0	0.389303075877	0.0	0.0210897324782	0.0	0.017533348297585898	0.0016626745836559765	0.0059604338021	0.0059604338021	0.5626975137560001	0.023696853664726427	0.022486731043101008
17862306	0.0	0.0	0.0	0.0	0.0	0.162162162162	0.0	0.1597514154953993	0.002631543667420675	0.0	0.0	1.4537383429700002	0.022367401173695525	0.01581958459007326
17862490	0.0322004830145	4.77599159826	2.56320767564	135.587703473	0.0	0.120099564406	0.0	0.0799181432367511	0.016634625214085763	56.92090977141618	33.249016562337786	359.17716162721456	0.09230132450333167	0.05861092103135115
17880912	0.000315153164281	0.0330388826951		0.6216737462049999	0.0	0.00235452404978	0.0		0.000315153164281	0.04504079269645	0.0	1.0531579406103	0.011418022699324858	0.0
17899335	0.0	0.0		0.0	0.0	0.0	0.0		0.001384457207196972	0.0908616215456	0.0	4.0453912976699975	0.003214759941296017	0.0
17864286	0.280357289477	0.00753093045205		0.122750372131	0.0	0.016835016835	0.0		0.04241994897255736	2.9432544254240502	0.016553602879899997	62.68412621339411	0.07656967840734495	0.010979746047908577
17862510	0.0156100485685	0.0553998818505	0.0478218921635	2.21462637283	0.0	0.0278578290106	0.0	0.02273831054187038	0.0030368782348804365	0.17417461387228994	0.126152731303648	21.2626682731544	0.023431994362214336	0.01571909453867109
17908221	0.0	0.0		0.0	0.0	0.0	0.0		0.0026649803691462287	0.0	0.0	0.0	0.032268632268657435	0.0
943020319	0.007541867637649999	0.0	0.0	0.0	0.0	0.0202966432475	0.0	0.018810191946302512	0.012487258702486018	0.0	0.0	0.107345929428	0.08220213813487763	0.023435286383779688
17864272	0.000629234703192	0.0		0.0	0.0	0.00671986560269	0.0		0.005766927801611771	0.0	0.0	0.0	0.006878374903585065	0.0
17908213	0.00986078905817	0.0		0.0	0.0	0.0514285714286	0.0		0.01830647549549172	0.0005714664584959999	0.0	0.4270760809664	0.027181991930340186	0.0
17865634	0.0	0.0	0.0	0.00403318515964	0.0	0.041958041958	0.0	0.02648923824133999	0.0	9.41187974758	0.502268983517	122.20395680815963	0.055563277503623325	0.02156424429714986
17862866	0.0	0.0326155681978		0.0331905720523	0.0	0.238095238095	0.0		0.0	36.05138874131779	7.56100007077	118.21326642597231	0.016367137355567104	0.0008279801211668205
17864326	0.0	0.00113962823525	0.0008547211764380001	0.048719107057	0.0	0.05385852090030002	0.0	0.04547037534854817	0.0042697971754838675	0.026747822179450004	0.019756007182838	3.844006161027	0.019499401334140014	0.017985454773104724
17900443	0.00448451413871	0.0742600843078		7.863707689630001	0.0	0.0271873455264	0.0		0.0032226237500621755	0.10874606500150999	0.0	9.454340924334	0.02881602325954149	0.003202143611575602
17900367	0.0146465364774	0.7277803717010001		67.1890861855	0.0	0.0423276235832	0.0		0.020066593187262786	1.217540256894	0.0	77.47081757629	0.04390633591668714	0.0
17905833	0.229766697233	0.0		0.0	0.0	0.187755102041	0.0		0.0668963250794926	0.0	0.0	0.0	0.18497392438053928	0.0
17862816	0.00618644154962	3.51107862548		9.46897119562	0.0	0.014486811534799996	0.0		0.00489946886227617	11.083755506866801	0.0	22.2347836878023	0.0154945648910249	0.0
17864342	0.012235888466700002	0.111503932858		0.495251468266	0.0	0.276707530648	0.0		0.02246567254229417	114.77386587763	77.57362176957989	1411.9426610244132	0.07336846372112434	0.014632566745586922
17906541	0.0016308174154400002	0.0261623496772		0.259776162682	0.0	0.019073049780700003	0.0		0.00785894299185973	71.14903050576922	0.0	294.64160898936524	0.057371140213877674	0.0
17906919	0.341549438337	0.015331329836	0.6804148000229999	2.13003120355	0.0	0.126344086022	0.0	0.08517143469078886	0.02734665590886697	65.668080802156	68.521636352533	219.66236086493998	0.13085234093664194	0.13116681867357838
24604467	0.022934325929400003	0.0		0.0	0.0	0.0	0.0		0.022934325929400003	0.0	0.0	0.0	0.01829137077682305	0.0
17862784	0.009683125636819999	0.0		0.839515251573	0.0	0.0	0.0		0.009683125636819999	4.465558061578999	0.0	37.029588599693	0.011420740063975528	0.0
17908251	0.135380378551	0.0032201080903200003	0.0032201080903200003	0.0032201080903200003	0.0	1.0	0.0	0.9999999999950416	0.06331748811230384	6.32613735715742	3.45463676898052	96.4959697802204	0.08433492019039804	0.07020986994823526
17908177	0.06876428348510001	0.0508961233136	0.0505482646404	0.071419785032	0.0	0.7591836734690001	0.0	0.7166440255956755	0.11328451608510695	2.0343693339136	1.8185054691304	26.488430782431998	0.2626543870917976	0.2503075087375014
17899435	0.371025835018	0.0		0.0	0.0	0.265979381443	0.0		0.03525239099451551	0.06743278441719999	0.0	0.577443693765	0.04748811365070652	0.0
17863340	0.0	0.226979510975		0.23790458421	0.0	0.015503875969	0.0		0.00017738391170296183	36.27836825229279	7.56100007077	118.4511710101823	0.01626708280132887	0.000732014770196003
17900407	0.00837673786753	0.306026355829		9.30763758952	0.0	0.0091090652248	0.0		0.006520317891435496	21.154692163231	0.0	123.93761500883998	0.023188848966710057	0.0
17899341	0.014945429486700001	0.0908616215456		4.0453912976699975	0.0	0.00441805881541	0.0		0.01263450182211083	0.6099308973645199	0.0	33.082058009694	0.008893587909696101	0.0
17906315	0.0543780708297	0.0		0.0	0.0	0.152173913043	0.0		0.07410979440423003	0.0	0.0	0.29867020470600003	0.12656502853239954	0.0
17899355	0.115874027901	4.38476995306		172.91882182900002	0.0	0.0411892226696	0.0		0.12458021658613035	6.889815176397001	0.0	242.03474695250003	0.035630767683379215	0.0
17908445	0.0981051160829	0.0		0.0402833354892	0.0	0.0	0.0		0.07752446287042136	0.00319709011819	0.0	3.0340385221663	0.0013867221355507062	0.0
17863346	0.0347778702501	8.182727336880001	3.05439480394	53.9655419979	0.0	0.129062209842	0.0	0.04055445029748756	0.014091710406078891	61.656054010427006	16.962381746109006	422.30843984997	0.09821692444104016	0.049343943404010326
17906303	0.0	0.0247723330976		0.103763357503	0.0	0.0517998244074	0.0		0.0579340081904856	0.02804415067653	0.0	0.7576594707790001	0.02303625377641452	0.0
17899331	0.020662912267599996	1.31852785501		16.735760076600002	0.0	0.0302947195207	0.0		0.0451058512086233	2.0135143590501	0.0	37.1268123761095	0.03177036860165159	0.0
17862532	0.005466132787350001	0.0	0.0	0.0	0.0	0.048537234042600005	0.0	0.02962665587608445	0.008113554708937475	15.43919506437	8.90077393688	69.33909016829999	0.05339739190117285	0.03182548532099426
17862428	0.00194743299223	40.9573772595	42.9684493061	101.99039363600001	0.0	0.029547705513400007	0.0	0.02399200076774283	0.0018843961309604	43.856281752924005	44.114669511481	105.50748338931	0.026426080557954455	0.017095993131711746
17862794	0.023215479509200002	0.0905771672406		4.3235642297800005	0.0	0.0194766869959	0.0		0.0240560171959626	9.4551193454706	0.0	57.878633336780005	0.018280720527900043	0.0
17907007	0.00294211182676	0.0		0.634622388461	0.0	0.0	0.0		0.00294211182676	0.007673016283659999	0.013747487508220002	2.692427924486	0.011080985500399996	0.0085012874128741
17906849	0.0985392464357	0.0166392514075	0.0166392514075	0.0166392514075	0.0	1.0	0.0	1.0000000000485063	0.07090704539127203	17.19053532388796	7.9146192730218194	46.463175082208224	0.31048069345953283	0.2558924854962306
17864402	0.0319947226338	0.0922541712062		11.1480888263	0.0	0.0011471648639800002	0.0		0.0319947226338	1.0144597334152	0.0	36.7222316936	0.016145733461132697	0.0
17863000	0.0396157467736	18.9262915254	7.997646583239999	216.08150833	0.0	0.077849341921	0.0	0.03108931875326055	0.0077521837233770294	35.59700466322701	16.482263738749	406.29505848697	0.07715317173799541	0.03449756291041288
17862732	0.0186243786391	2.97821907462		28.0289985273	0.0	0.0200727272727	0.0		0.0211135946972812	34.30579101133	21.0667257404	93.9987656202	0.018506440567413983	0.0037363407502074147
17882938	0.047248098076	0.0		0.00178554927697	0.0	0.00208339909719	0.0		0.047248098076	0.0	0.0	0.00178554927697	0.0014345577409469589	0.0
17908225	0.0	0.0		0.0	0.0	0.00990099009901	0.0		0.005286793958861357	0.0	0.0	0.0	0.03182472413244102	0.0
17864354	0.00295155459584	0.0		0.0	0.0	0.0137732222934	0.0		0.0052707637667886355	0.0	0.0	0.0	0.018534975244399503	0.0
17906841	0.139069419903	8.507122299239999	3.01433221709	10.0095292369	0.0	0.859960552268	0.0	0.6310967726115283	0.05300245040109455	11.452009471006498	3.4014057168079	78.9262017306013	0.18745711541104207	0.11330809691032455
17907127	0.039596974762800004	0.00319709011819		2.64623149083	0.0	0.00161404216685	0.0		0.047153507737128376	0.00319709011819	0.0	3.889579837795	0.009118261788287046	0.0
17906839	0.0	0.0026085526915300005	0.0026085526915300005	0.0026085526915300005	0.0	1.0	0.0	0.9999999999983128	0.04658308417445999	2.94749572445803	0.38968205240943	68.91928104639283	0.15567800670824342	0.08912775175507795
17899315	0.0611909384726	0.909552087047		16.7009490063	0.0	0.0563433035475	0.0		0.014836314418324668	2.976455947245	0.0	89.358730597	0.07267073875158811	0.0
17862266	0.00429128630766	0.0	0.0	0.0	0.0	0.062039957939	0.0	0.05528565819853284	0.024749292716710624	0.0	0.0	1.4537383429700002	0.02599715099711432	0.01988848710508209
17863348	0.0	0.0339482163545	0.0313368150964	2.24529148825	0.0	0.0691244239631	0.0	0.06396419590538886	0.03769798513827203	0.493641016073	0.4805840097828	49.46112859597099	0.043081672747685366	0.03887309149799883
24604497	0.0224158662315	0.0		0.158768823116	0.0	0.0	0.0		0.0224158662315	0.00114006335571	0.0	0.32965831980300003	0.0015853149770564757	0.0
17863440	0.00040506784216400016	29.3219776882	7.56100007077	110.943312554	0.0	0.0160134306192	0.0	0.000999542606401167	0.00029249853139278663	62.936713347440005	23.13083594455	462.0469063821	0.037742412383657435	0.011662010547287749
24604451	0.013813070972799999	0.0		0.0	0.0	0.0	0.0		0.013813070972799999	0.0	0.0	0.0	0.0050253859703640975	0.0
17906035	0.012362428309799998	0.0		0.0	0.0	0.00326441784548	0.0		0.008355764754340567	0.0	0.0	0.13230735259610002	0.03665679499838198	0.0
17906979	0.0	0.0015985450590999995		0.0997492116876	0.0	0.00655307994758	0.0		0.019217264066402125	0.00927156134276	0.013747487508220002	2.1575547477126	0.020569291502160133	0.014983673617995215
17906953	0.012746055386299998	0.00319709011819	0.008632143319120001	1.2638169094	0.0	0.016052318668299998	0.0	0.025988066980046614	0.007473964408565733	65.67415527338056	68.53282616794667	221.14026804788105	0.12003385705995565	0.11901117303164592
17864258	0.0	0.05950174550530001	0.056890344247199985	2.6631604177200003	0.0	0.0403225806452	0.0	0.03335419330524031	0.0	0.08995335944931003	0.07864070084172797	29.648566824447	0.025845452952494498	0.022062953259954145
17862380	0.00033821351178900004	0.0	0.0	0.0	0.0	0.0149788342559	0.0	0.013290383491197315	0.0005701901132055157	0.0	0.0	0.389303075877	0.021574306075298092	0.01765642505975936
17863410	0.0422369167139	0.0		0.000241597779677	0.0	0.0271381578947	0.0		0.0422369167139	0.0	0.0	0.0007247933390309999	0.002552680314327873	0.0
943020359	0.00374330269755	0.0	0.0	0.0	0.0	0.050641458474000006	0.0	0.049773606360057635	0.0012993320322381467	0.0	0.0	0.0354948017048	0.02092867167001697	0.02548917006161849
17906397	0.0310296709926	0.0		0.0	0.0	0.0787878787879	0.0		0.07641318027099099	0.0	0.0	0.0	0.08941387559807865	0.0
17906319	0.0984228493919	0.0		0.0	0.0	0.0638888888889	0.0		0.07634731227930222	0.0	0.0	0.0	0.13550289148418254	0.0
17906517	0.00391127566385	0.0		0.07102182193189999	0.0	0.0	0.0		0.01503444068802448	0.0368006472127	0.0	0.8863873312949	0.01239797499744086	0.0
17862208	0.006351908199999999	0.0	0.0	0.0	0.0	0.0299188640974	0.0	0.03006888511940705	0.009042890031329048	0.0	0.0	1.4537383429700002	0.02485705209654225	0.02340161471202833
17896451	0.00031517338938099996	0.0		0.0	0.0	0.0221516410131	0.0		0.0020632640604371557	25.7093509897	0.0	129.407256719	0.04761064549331162	0.0
17906843	0.013817887259799998	1.99116581035	0.00934790362953	31.162465415	0.0	0.07925517612260001	0.0	0.011149429732238196	0.033344094766064945	4.95932832997962	0.41798130959775	100.10600008902742	0.131498132521815	0.06374661019016081
17862680	0.0	0.0059604338021	0.0059604338021	0.173394437879	0.0	0.0261506276151	0.0	0.0244179456788783	0.0013246846954053859	0.00785771984374	0.008332041354150001	0.17877008166364994	0.03090405904062877	0.03434638098705832
17907123	0.00145689795056	0.0		0.0	0.0	0.0365853658537	0.0		0.0223377137324191	0.0	0.0	0.0	0.012795235987612756	0.0
17908227	0.00233876286178	0.0		0.0	0.0	0.0576221735959	0.0		0.005051017951958325	0.0	0.0	0.0	0.03718674211804535	0.0
17866202	0.0	0.0	0.0	0.0	0.0	1.0	0.0	0.9999999999417925	0.0028696392695755626	2.3899841317900004	2.133555762702	115.212557835873	0.7575142160845768	0.7193380992824109
17862984	0.0	0.00261140125804	0.00261140125804	0.00261140125804	0.0	0.368421052632	0.0	0.41834267605153774	0.0005149879733843195	0.47336307051544	0.46291746548324	48.64077913340803	0.04192523081580707	0.03885124814841626
17906955	0.0138871323144	0.0006325084978019999		0.051956055176599986	0.0	0.0110584518167	0.0		0.0016081079696465671	0.239389846697902	0.0100458461093	7.779651652159599	0.0645161290322893	0.01160293645487964
17862544	0.128744837838	0.00419038190739	0.000444873148808	0.013133027940100002	0.0	0.5	0.0	0.30610369630645784	0.007076026332143345	0.054231361427790004	0.021800319082148	18.3175978366004	0.01974214343269619	0.012753708888092992
17862496	0.061788545324300004	11.164096631800001	4.7646067502800005	159.202280849	0.0	0.07523066004260001	0.0	0.051050659540055686	0.056088024501249216	52.14910855506357	30.686253759846593	223.6025911821547	0.08599682147266574	0.0535260075529783
17899329	0.023547678681400005	0.00938756135292		0.201787132304	0.0	0.0487804878049	0.0		0.03485049199172775	21.16407972458392	0.0	124.139402141144	0.023215558497113417	0.0
17907001	0.009000649706989999	0.0		0.607127413445	0.0	0.0	0.0		0.0047233139228123186	0.0035167991300189987	0.00255767209455	1.4875522376386	0.0017169838317379466	0.0010999308066996737
17908431	0.0565746252719	0.0		0.0	0.0	0.00642496558054	0.0		0.02817069199386183	0.0	0.0	0.0	0.003944562899789506	0.0
17907015	0.00403099232642	0.0		0.538182720426	0.0	0.0	0.0		0.00403099232642	0.023876634368169995	0.0	1.4318534368659	0.006189872473698946	0.0
17910103	0.104773026248	0.0		0.0	0.0	0.00487329434698	0.0		0.07169359863057184	0.0	0.0	0.0	0.003235335490227727	0.0
17905805	0.9268522623100001	0.0		0.0	0.0	0.658064516129	0.0		0.12104739938180407	0.0	0.0	0.29867020470600003	0.12540610786214595	0.0
17863080	0.00803795725925	0.0		0.000483195559354	0.0	0.000959334861163	0.0		0.010119439550498531	0.0	0.0	0.08203007650445401	0.0017603218874312516	0.0
17862486	0.0	0.8483365997669999	0.107142858207	1.34540118277	0.0	0.5	0.0	0.10413987121871064	0.03191913819555388	57.152668299047	53.476252529499	238.76301864407	0.0482917214192564	0.0331826938703423
17862504	0.08894293403049999	0.0913702802791	0.0800219670637	0.906186639128	0.0	0.121900826446	0.0	0.09957331869317833	0.010135577768188344	0.26554489415139	0.20617469836734809	22.1688549122824	0.02615349474643957	0.018036673598217774
17906239	0.05826210045080001	0.0		0.0	0.0	0.00187914152903	0.0		0.05826210045080001	0.0	0.0	0.0	0.005365183789482783	0.0
17864374	0.0	0.0		0.0	0.0	0.0332409972299	0.0		0.0011855924345480888	0.0	0.0	0.0	0.02125516268765352	0.0
17862990	0.00673613184247	6.50571679696	4.517794486600001	81.05654350020001	0.0	0.0709046454768	0.0	0.034238875998219065	0.0027554715623648537	53.473326673547014	13.907986942169002	368.34289785207	0.09455587392562977	0.05038717506322622
17029298	0.08374566946610001	0.0		0.0	0.0	0.0	0.0		0.08374566946610001	0.0	0.0	0.0	0.0	0.0
17864300	0.0	0.00370379176456	0.00199434941169	23.1414002457	0.0	0.049460668245199985	0.0	0.0364575548841231	0.00543411320094364	0.030451613944010008	0.021750356594528	26.985406406726998	0.02483598875349048	0.021275635303656767
17906835	0.022865961411299998	0.0		0.000250016575592	0.0	0.0	0.0		0.009347838161234344	0.0008214830340880001	0.0	0.06450427650271999	0.0334816462736584	0.0
17863078	0.00681388010072	0.0		0.0	0.0	0.013884185574	0.0		0.0044919924309292395	0.15272948381571694	0.0	1.1718771703012998	0.032615075039807394	0.0
17880308	0.0028210953722	0.0		0.0	0.0	0.0	0.0		0.0028210953722	0.0	0.0	0.0	0.0060021436227191355	0.0
17883026	0.0	0.0		0.0	0.0	0.0396825396825	0.0		0.0	0.09748279841730001	0.0	2.32689808349	0.05274864950747028	0.0
17880606	0.0110423734112	0.0		0.0	0.0	0.000188714851859	0.0		0.0110423734112	0.0	0.0	0.0	0.0023384474990008016	0.0
17881600	0.0257747829904	0.0		0.0	0.0	0.000171174255392	0.0		0.017555027150108485	0.0	0.0	0.0	0.004607267593071544	0.0
17880838	0.00210668567683	0.0		0.0	0.0	0.00880136583068	0.0		0.002000568172786626	0.0	0.0	0.0	0.021997942286016158	0.0
17883620	0.241526218715	7.63783987168e-05		0.000997412030301	0.0	0.07657657657660001	0.0		0.12397346317019375	2.048374562728717	0.0	219.2187823720303	0.060213961271817225	0.0
17881776	0.0800718568138	5.14668026881e-05		0.0248584656983	0.0	0.000645577792124	0.0		0.056823600755841724	0.0007205352376332	0.0	0.4068965420517	0.002802785799216752	0.0
17881640	0.00965689909853	0.000693139656505		0.0197229738624	0.0	0.007180156657960002	0.0		0.004218210934101717	0.0038671203074009	0.0	10.7455588285424	0.00851083406175532	0.0
17881096	0.5072058363	0.006689883819489999		0.0177896910536	0.0	0.3924812030080001	0.0		0.7513190721112337	13.961098078274288	0.0	263.6500629798288	0.14280431079851064	0.0
17880508	0.043792131163699996	0.0		0.0	0.0	0.0024640657084200003	0.0		0.043792131163699996	0.0	0.0	0.0	0.003226865018593593	0.0
17880266	0.0	0.0		0.0	0.0	0.0	0.0		0.0	0.0	0.0	0.0	0.008358025381558144	0.0
17880602	0.00109743225554	0.0		0.0	0.0	0.0	0.0		0.0010974322555399997	0.0	0.0	0.0	0.00448367661482376	0.0
17880420	0.014237070813599999	0.0		0.0	0.0	0.000478011472275	0.0		0.03200943108556608	0.0	0.0	0.0	0.0024036762106754038	0.0
17880854	0.00520711549544	0.00140172810643		0.225826053727	0.0	0.00758175851533	0.0		0.0049072496142906355	0.0051980750613500005	0.0	0.26530806205812096	0.0183129173665372	0.0
17882958	0.0	0.0		0.00936329568503	0.0	0.014175460702500003	0.0		0.0	1.5074823018934	0.0	5.729639729649029	0.13309747468593536	0.0
17880872	0.0013775547185199998	0.0		0.0	0.0	0.00448900194523	0.0		0.002705894237329008	0.281166980065	0.0	6.35677660559	0.08140860279523103	0.0
17880608	0.0012353181399999999	0.00877631920048		0.334464471098	0.0	0.0316205533597	0.0		0.0007868610064710823	0.014748702167709998	0.0	0.4539373303707	0.02622622622625581	0.0
17880254	0.00487271087826	0.0		0.034858991939500004	0.0	0.0	0.0		0.00487271087826	0.00116810675536	0.0	0.2467138890735	0.003090919694409448	0.0
17881754	8.86415775521e-05	0.00403406540863		0.349619002081	0.0	0.00133280021325	0.0		8.86415775521e-05	0.04661712548113	0.0	0.7354431627600001	0.021178909952608533	0.0
17880672	0.0209512128062	0.0		0.0	0.0	0.00050577425609	0.0		0.0209512128062	0.0	0.0	0.0	0.002049571020019529	0.0
17881742	0.04321011463169999	0.00134602558319		0.0131651203083	0.0	0.10843373494	0.0		0.02162791242858945	0.08932112138065801	0.0	0.13753609735081798	0.03209602368870844	0.0
17880422	0.0444013134394	0.0		0.0	0.0	0.0	0.0		0.0444013134394	0.0	0.0	0.0	0.0010124873439078413	0.0
17881716	0.000845009684761	0.0		0.0	0.0	0.00422465208748	0.0		0.014627508614406069	0.0	0.0	0.0	0.004849660523762591	0.0
17881792	0.13434446498299998	0.0		0.0123005658425	0.0	0.0	0.0		0.13434446498299998	0.000308800816128	0.0	0.30555840755950003	0.0012555342628666367	0.0
17881774	0.0738785343449	5.14668026881e-05		0.027483272635400003	0.0	0.0027777777777800005	0.0		0.1691586988983577	0.0006690684349451	0.0	0.38203807635340004	0.002901726231010986	0.0
17881622	0.00933949017509	0.0		0.0	0.0	0.0	0.0		0.00933949017509	0.0	0.0	0.0	0.0020521395454855267	0.0
17881722	0.00926264757445	0.0		0.0	0.0	0.00151483853198	0.0		0.00926264757445	0.0008808175516607998	0.0	0.026580137036933998	0.005148250548184105	0.0
17883030	0.0	0.000707662420609		0.0290886500261	0.0	0.029224904701400007	0.0		0.0001258441172466602	0.011498383286379001	0.0	10.990721303050098	0.023767806810393338	0.0
17880260	0.0	0.0		0.0	0.0	0.0	0.0		0.0	0.00262824019956	0.0	0.192533195952	0.0057024153802298395	0.0
17881818	0.0068662889627899995	0.000521435467817		0.890355126678	0.0	0.00131567406368	0.0		0.005638218726717096	0.0072216112494100015	0.0	4.592292062718	0.0024643737276328565	0.0
17880844	0.0	0.0		0.0	0.0	0.0	0.0		0.0	0.0	0.0	0.0	0.00015775358889415748	0.0
17882936	0.000917263368376	0.052225965599100005		1.89916212828	0.0	0.00499628654379	0.0		0.000917263368376	0.052667054471421004	0.0	3.48930366954	0.022598573825501945	0.0
17880904	0.00273163301322	0.0		0.0	0.0	0.0126248612653	0.0		0.0017529770286455475	0.168205121998	0.0	0.238974350155	0.03878541707946118	0.0
17881826	0.00407803253484	0.0		0.122686316499	0.0	0.0	0.0		0.00407803253484	0.011024635605268	0.0	2.310462622358	0.02014867982567884	0.0
17881758	0.0281935331921	0.0		0.0	0.0	0.0015089784216099993	0.0		0.03138648208686928	0.000823468843009	0.0	0.3636644277937901	0.0029254264180878296	0.0
17881664	0.013491918365100001	0.0		0.0973792467266	0.0	0.0	0.0		0.013491918365100001	0.00763937430747	0.0	0.3332104335426	0.015636276160671942	0.0
17881668	0.0341177483226	0.0		0.0	0.0	0.0026981450253	0.0		0.02974560074717744	0.0	0.0	0.0	0.0038014958059597037	0.0
17881658	0.000991814046696	0.0		0.0	0.0	0.0	0.0		0.000991814046696	1.24400949648	0.0	4.92876237486	0.006319000581059404	0.0
17882970	0.00637223112724	0.00093113476396		0.15415867152100002	0.0	0.0029687685548000003	0.0		0.008052388921047687	0.001787778746803	0.0	2.611556448271	0.002609096024962077	0.0
17880270	0.0053119238541499995	0.0		0.0458189874789	0.0	0.0	0.0		0.004112311562464967	0.001777115554427	0.0	0.3711311924075	0.0017647482532599933	0.0
17880490	0.000406041310735	0.00507080838725		1.11678746111	0.0	0.0234346393263	0.0		0.0006655246827705428	0.7732345508340501	0.0	8.28697798908383	0.1824202606758052	0.0
17880548	0.00033760357588700005	2.51999281318e-05		0.0716937955349	0.0	0.000168577208361	0.0		0.00033760357588700005	0.0050960083153818	0.0	1.2292595866792395	0.005132659507274381	0.0
17880858	0.012110755447200002	0.0		0.0	0.0	0.00811808118081	0.0		0.008033210367105623	0.0	0.0	0.0	0.02936435629688136	0.0
17882960	0.0	0.0		0.0	0.0	0.0	0.0		0.003575203650970234	1.5074823018934	0.0	5.720276433963997	0.17323617091760946	0.0
17880906	0.000476302078293	0.00871917513359		0.438579549205	0.0	0.0120331084371	0.0		0.0004763020782930001	0.016619416981481998	0.0	0.50433344667517	0.02068118861749564	0.0
17881724	0.0607156568792	0.0		0.0	0.0	0.0	0.0		0.06071565687919999	0.000926402448385	0.0	0.0315491500478	0.0016565433462166484	0.0
17880676	0.0146494655399	0.0		0.207484190469	0.0	0.0	0.0		0.014649465539900004	0.0016598735237499998	0.0	1.1498312759799998	0.0010568285535857932	0.0
17881584	0.126162350269	0.0		0.00903708918486	0.0	0.0	0.0		0.028092937955047054	0.0010143671534029	0.0	0.34119622432589003	0.001335782267490663	0.0
17882930	0.000585948508711	0.000368860783055		0.373840403627	0.0	0.0186592286236	0.0		0.000585948508711	0.000809949655376	0.0	1.963981944887	0.037590394323882434	0.0
17880870	0.00670310810376	0.0		0.0	0.0	0.00759898680176	0.0		0.00670310810376	0.0968364146828764	0.0	0.4066813459208764	0.040367748071406494	0.0
17881634	0.031649438809500004	0.000184430391528		0.0053484813543	0.0	0.0177383592018	0.0		0.035481715639379165	0.0057950703921919	0.0	0.14804232044840002	0.015148906868633984	0.0
17881580	0.0113851847142	0.0		0.0	0.0	0.0025535258299	0.0		0.041076035648373525	0.0	0.0	0.0	0.004964635473337722	0.0
17881738	0.020949123954599996	0.0008063267705439999		0.0246433767279	0.0	0.0140204622963	0.0		0.02286175980743968	0.090127448151202	0.0	0.16217947407871802	0.028152128978946894	0.0
17880410	0.0069407378044	0.0		0.00109274010538	0.0	0.0	0.0		0.00013760621576091477	0.010166000698517998	0.0	0.39953701282857	0.053865053865065016	0.0
17881786	0.004497657873449999	0.00163879718457		0.213714051024	0.0	0.00376196990424	0.0		0.004497657873449999	0.32546948019583	0.0	2.0135630882660003	0.029086366880792625	0.0
17882950	0.0194485078923	0.0		0.0033968986244899994	0.0	0.0007823365785810001	0.0		0.0194485078923	0.0	0.0	0.0033968986244899994	0.001586514625681776	0.0
17881764	0.05244848854180001	0.0		0.0815748822606	0.0	0.0	0.0		0.05244848854180001	0.0007205352376332	0.0	0.4884714243123001	0.002273092553898333	0.0
17882942	0.0	0.135685878689		1.08084819606	0.0	0.07743055555560001	0.0		0.0002944602485895129	1.783354112485	0.0	10.539573909639	0.0764270184619138	0.0
17880498	0.000584842850352	0.000422952205554		0.073116750933	0.0	0.00295100222717	0.0		0.000584842850352	0.035041313403853996	0.0	0.8539522091130001	0.009396206716544855	0.0
17880668	0.0142954953338	0.0		0.0	0.0	0.0020033388981600003	0.0		0.038054118752806204	0.0	0.0	0.0	0.0052792086312460655	0.0
17880944	0.07887746433510001	0.0		0.28441438460900004	0.0	0.0967013104383	0.0		0.017587506238141325	0.08941748270449999	0.0	1.4731699527630002	0.09280463669781598	0.0
17881710	0.0150264865538	0.0		0.0	0.0	0.00615224191867	0.0		0.0150264865538	0.0	0.0	0.0	0.0022338049143724717	0.0
17880478	0.0612915440211	0.0543589723529		0.0625641002553	0.0	0.021978021978	0.0		0.0281679126800942	0.1713967906834	0.0	0.5194963189566001	0.0675101559834868	0.0
17880656	0.022716233081900003	0.0		0.0	0.0	0.00215173732866	0.0		0.022716233081900003	0.0	0.0	0.0	0.004297491668129106	0.0
17880846	0.00395343851673	0.00262824019956		0.192533195952	0.0	0.006102877070619999	0.0		0.003694019778167333	0.51514842456156	0.0	4.743739020668683	0.03757440476191117	0.0
17880528	0.0168542976754	0.0		0.0	0.0	0.00813434794017	0.0		0.034556787206888984	0.0	0.0	0.0	0.003082710695435893	0.0
17883022	0.0132745612051	2.01838374778e-05		0.052918135864300005	0.0	0.2	0.0		4.852700129811735e-05	0.1437089158944378	0.0	2.5730063226113	0.061851458452485276	0.0
17880840	0.000468590214703	0.0		0.0	0.0	0.00163744943171	0.0		0.0004685902147030001	0.01781170489266	0.0	0.989821886178	0.0025458248472522704	0.0
17880494	0.0024733029711100003	0.0		0.005750429931140001	0.0	0.0	0.0		0.0003970382552314233	0.08211567071705	0.0	1.6102051432849698	0.1485368314832701	0.0
17881768	0.0400621290965	0.0		0.00444209820125	0.0	0.00163547156097	0.0		0.0400621290965	0.0	0.0	0.00444209820125	0.003837230055328364	0.0
17880346	0.0023552896840900004	0.0		0.0	0.0	0.000196966712626	0.0		0.0023552896840900004	8.36238468764e-05	0.0	8.36238468764e-05	0.05002148689299128	0.0
17880398	0.0181313688754	0.0		0.0	0.0	0.275862068966	0.0		0.006145271396249668	0.0968364146828764	0.0	0.4066813459208764	0.10304556904044487	0.0
17880666	0.028457057941299997	0.0		0.0	0.0	0.0117647058824	0.0		0.0249327099182584	0.0	0.0	0.0	0.005595215126371256	0.0
17881904	0.0020553999818	0.0		2.79455842441	0.0	0.0	0.0		0.0006777380128653518	1.39206926308	0.0	61.06969399222999	0.018678011829436517	0.0
17880554	0.010893616251999999	0.0		0.0	0.0	0.0	0.0		0.010893616251999999	0.0	0.0	0.0	0.0001256992018099896	0.0
17881800	0.0	0.0		0.0417645067073	0.0	0.00194727381666	0.0		0.0	0.1409801619866084	0.0	2.3346213093924	0.037687659627483286	0.0
17881636	0.0244154813222	0.0		0.000184430391528	0.0	0.000960219478738	0.0		0.0244154813222	0.0056106400006639	0.0	0.14287826948562804	0.009481497534798605	0.0
17882924	0.00037052203132099997	0.00499273861169		0.360533181678	0.0	0.0126530426471	0.0		0.0009292934753367977	0.008859858919090899	0.0	11.1060920102204	0.010593026448243104	0.0
17881806	0.178381839323	0.000308800816128		0.29325784171700003	0.0	0.00170296674733	0.0		0.16681158885211916	0.0009778692510731	0.0	0.6752959180704001	0.0026040507456019327	0.0
17881884	0.00332544569496	1.39206926308		54.505411459099996	0.0	0.0245382046214	0.0		0.003314734569566453	2.0429240282989998	0.0	113.27049233158199	0.02903187978493833	0.0
17880376	0.0182124957245	0.00651778915926		0.7190032912790001	0.0	0.036856010568	0.0		0.014257313687198216	0.28960345347889005	0.0	7.324618262595	0.08659631987405021	0.0
17882980	0.000313773180185	0.00666367952363		14.7825957846	0.0	0.00357302367128	0.0		0.00044585068299334365	1.39873294260363	0.0	75.85228977682999	0.01527853165271693	0.0
17880582	0.0	0.0		0.0	0.0	0.0	0.0		0.0	0.0	0.0	0.0	0.0046336518969008365	0.0
17880302	0.0	0.0		0.0	0.0	0.0	0.0		0.0	0.01781170489266	0.0	0.989821886178	0.0031576869942787802	0.0
17881586	0.0593327838395	0.0		0.0	0.0	0.0	0.0		0.0593327838395	0.0	0.0	0.0	0.0023629849836127787	0.0
17882928	0.0674477189659	0.0		0.0	0.0	0.00976042590949	0.0		0.05173547381760559	0.0	0.0	0.0	0.004159597175852541	0.0
17881870	4.92536146291e-05	0.000744907811168		1.22755476938	0.0	0.00298429998702	0.0		0.0006705495609737871	0.011024635605268	0.0	2.1877763058590003	0.02883768711475387	0.0
17881642	0.00361756729928	0.000184430391528		0.212832671823	0.0	0.000310896937665	0.0		0.00361756729928	0.007823804698998	0.0	0.4486638586390001	0.011991721451165005	0.0
17881756	0.022042034317099998	3.72453905584e-05		0.0343030047043	0.0	0.000110120030834	0.0		0.022042034317099998	0.09016469354176042	0.0	0.196482478783018	0.02049833188063866	0.0
17880638	0.00108446842208	0.00322559080087		0.0970197233073	0.0	0.0162858224972	0.0		0.0006743181255143343	0.011125832648762	0.0	0.16277362077747	0.04023776863288058	0.0
17880276	0.0029676550187500003	0.0		0.0	0.0	0.0	0.0		0.0029676550187500003	0.0	0.0	0.0	0.004497663551400868	0.0
17880600	0.000531690266732	0.0		0.0	0.0	0.00190443213296	0.0		0.000531690266732	0.168205121998	0.0	0.238974350155	0.030580804190422868	0.0
17880282	0.012045277125500001	0.0		0.0	0.0	0.0195295162006	0.0		0.006055510327844965	0.0	0.0	0.0	0.052645537727116436	0.0
17881656	0.0126986281816	0.0		0.0	0.0	0.00130039011704	0.0		0.01742475118401506	1.24400949648	0.0	4.92876237486	0.007408613530899691	0.0
17882964	0.041711401527	0.000617601632257		0.354554803718	0.0	0.00290582081791	0.0		0.07642256506880511	0.001550771521579	0.0	1.2732843218183998	0.0027297353615328536	0.0
17880618	0.0130248849644	0.0		0.0	0.0	0.0017560169404	0.0		0.022006635521672084	0.0	0.0	0.0	0.0029486663986083533	0.0
17881868	0.0	0.00346382132193		0.0205967009788	0.0	0.168173598553	0.0		0.0001359999130088753	0.014962204608308997	0.0	11.0113180040289	0.02960526315788322	0.0
17881824	0.011197455091399999	0.00584353179875		1.24453915929	0.0	0.00511695906433	0.0		0.008270908239489692	0.0067001757815930004	0.0	3.7019369360400014	0.003253404024579869	0.0
17881866	0.00014417557904799995	0.00290514046355		0.289135966905	0.0	0.00858788998804	0.0		0.00014417557904799995	0.017867345071858998	0.0	11.3004539709339	0.0211547707504621	0.0
17880390	0.0364445375283	0.0		0.0	0.0	0.181818181818	0.0		0.0067176393165018465	0.0968364146828764	0.0	0.4066813459208764	0.08840966838223162	0.0
17880916	0.00017362798419	0.00010079971252700004		0.0846717585227	0.0	0.000471364600519	0.0		0.00017362798419	0.006073182679757001	0.0	0.2041446177954	0.013659197381062676	0.0
17880620	0.0404168998826	0.0		0.0	0.0	0.000352485019387	0.0		0.0404168998826	0.0	0.0	0.0	0.0021452544894638398	0.0
17880534	0.013439506345299999	0.0		0.0	0.0	0.00494699646643	0.0		0.013439506345299999	0.017435896792400003	0.0	0.0523076903773	0.058426346975502676	0.0
17880566	0.003873366461340001	0.12548607035		1.23512340566	0.0	0.00862572442607	0.0		0.004480370813109393	0.317316771757893	0.0	3.410759704815	0.042270030035956765	0.0
17880622	0.0159210382481	0.0		0.0	0.0	0.00503054257995	0.0		0.003501642138104039	0.0	0.0	0.0	0.005942364324776122	0.0
17881588	0.00409865543658	0.000142615052027		0.0687814433568	0.0	0.00067264573991	0.0		0.0028297218648834052	0.005135353663717	0.0	0.4293146250348	0.010631455487852623	0.0
17880292	0.00460072398339	0.000540784094483		1.3473635713999998	0.0	0.00294677667966	0.0		0.00460072398339	0.004337131049403	0.0	1.3868455797311208	0.013128190879720914	0.0
17880860	0.0910103039786	0.0		0.000671661384331	0.0	0.08855585831059999	0.0		0.008628429073592946	0.01031413611418	0.0	0.7584852996101209	0.04138413142255323	0.0
17880598	0.00646179182294	0.0		0.0	0.0	0.00395952485702	0.0		0.0058551003127655975	0.12548607035	0.0	1.23512340566	0.007531467088517488	0.0
17880318	6.50297473947e-05	0.0025445292703800003		0.0101781170815	0.0	0.00014710208885	0.0		0.0001447667647057805	0.01526717562228	0.0	0.503398190065	0.009397490037460628	0.0
17880520	0.0025207789698000003	0.314533937187		2.56006315268	0.0	0.0224389470346	0.0		0.014294885364462025	0.34915229838530004	0.0	3.34089861086	0.025283446712037142	0.0
17880278	0.00020831445204400002	0.0		0.0	0.0	0.0	0.0		0.00020831445204400002	0.0025445292703800003	0.0	0.0101781170815	0.0001121076233186435	0.0
17881616	0.0479781526064	0.0		0.0	0.0	0.00364791715698	0.0		0.036014890164786165	1.24400949648	0.0	4.92876237486	0.005720398102504705	0.0
17881702	0.04926611595319999	0.0		0.0	0.0	0.000379280450802	0.0		0.04926611595319999	0.0	0.0	0.0	0.0036120700677642783	0.0
17880368	0.0	0.0		0.000119482217997	0.0	0.0	0.0		0.0	0.00611350682084	0.0	0.425937412193997	0.04078564986469297	0.0
17880328	0.00203945263804	0.00116810675536		0.00838116596969	0.0	0.0176322418136	0.0		0.009323325382929406	0.29077156023425	0.0	7.3329994285646904	0.08144163528744475	0.0
17880332	0.00435692415818	0.0		0.0667868356686	0.0	0.000145772594752	0.0		0.00435692415818	0.0	0.0	0.0667868356686	0.0015402387370028108	0.0
17880324	0.0156057221421	0.00262824019956		0.0304291809771	0.0	0.0617628801986	0.0		0.029596359924706418	0.01031413611418	0.0	0.7578136382257901	0.038832805246455215	0.0
17880832	0.00246210895805	0.0		0.000411055909353	0.0	0.00254509239792	0.0		0.00246210895805	0.0	0.0	0.000411055909353	0.023760523854084264	0.0
24611987	0.015805969053200003	0.0		0.0822559546214	0.0	0.0	0.0		0.015805969053200003	0.000922151957639	0.0	0.41994800150826	0.0010503466143828976	0.0
17881650	0.004165197654909999	0.0		0.0	0.0	0.0	0.0		0.004165197654909999	0.0	0.0	0.0	0.00032289312237644983	0.0
17880892	0.000529232491207	0.0		0.0	0.0	0.00670794633643	0.0		0.000529232491207	0.0	0.0	0.0	0.006224435354794565	0.0
17883608	0.48982252138099996	0.0		0.010311118489	0.0	0.0	0.0		0.5551873418019139	0.0021613956464539	0.0	0.7154004773320749	0.10379165070844992	0.0
17880372	0.0105489443888	0.0		0.0	0.0	0.0	0.0		0.0105489443888	0.0	0.0	0.0	0.0015976761074816862	0.0
17880402	0.0008611344968089997	0.0		0.0	0.0	0.00434392884231	0.0		0.0008611344968089997	0.05418825277593	0.0	6.028201786956999	0.03671988931691556	0.0
17883024	0.00611594417316	0.244970988741		0.499337229625	0.0	0.0593087195601	0.0		0.004786954104250565	0.38865972079796	0.0	3.019425416372	0.061225871994580565	0.0
17880828	0.007326996763640002	0.000204418682188		0.323113222899	0.0	0.00038034061615199987	0.0		0.007326996763640002	0.0007884720598669999	0.0	0.5893074584565	0.0012106023277549352	0.0
17880616	0.00249015444223	0.0		0.0	0.0	0.0	0.0		0.00249015444223	0.0	0.0	0.0	0.0021365536460733127	0.0
17881730	0.0541631396177	3.72453905584e-05		0.0017877787468000004	0.0	0.013856812933	0.0		0.05493374751931003	0.0902019389323188	0.0	0.164116234387752	0.027917545852974898	0.0
17881778	0.00033649961901000003	0.0		0.911832041869	0.0	0.0	0.0		0.00014437227289739	1.49725147079	0.0	6.348208135628999	0.21495772299641489	0.0
17880580	0.0168921658986	0.0		0.0	0.0	0.00639744102359	0.0		0.0096048702234681	0.0	0.0	0.0	0.03729603729603992	0.0
17881624	0.0206487358796	0.0		0.0	0.0	0.0013869625520099998	0.0		0.02271309790411592	1.24400949648	0.0	4.92876237486	0.007074746231931722	0.0
17881648	0.0225267511193	0.0		0.0	0.0	0.0	0.0		0.0225267511193	0.0	0.0	0.0	0.0013510318505744394	0.0
17880658	0.00662396401494	0.0		0.0	0.0	0.000309119010819	0.0		0.03463951853864772	0.0	0.0	0.0	0.005551546105586618	0.0
17880648	0.0383291978592	0.0		0.0	0.0	0.00525394045534	0.0		0.023361721553990297	0.0	0.0	0.0	0.006922776911075511	0.0
17881700	0.031949829643	0.0		0.0	0.0	0.00126403450071	0.0		0.031949829643	0.0	0.0	0.0	0.0012471257648417884	0.0
17881708	0.00264889385147	0.0013832279364600002		2.40562793828	0.0	0.00178104963192	0.0		0.00264889385147	0.0945163099386	0.0	3.5671497179734	0.022694326418392342	0.0
17880678	0.0	0.0		0.0536783753269	0.0	0.0	0.0		0.0	0.005135353663717	0.0	0.4829930003617	0.0098835777847924	0.0
17881646	0.0469418354088	0.0		0.0	0.0	0.0	0.0		0.03169626500747925	0.0	0.0	0.0	0.003460050079672287	0.0
17881598	0.0214087365803	0.0		0.0	0.0	0.00126146788991	0.0		0.024897281655323254	0.0	0.0	0.0	0.004755449878889153	0.0
17880522	0.031143261888099998	0.0		0.0	0.0	0.00222518914108	0.0		0.031143261888099998	0.0	0.0	0.0	0.002403725774952093	0.0
17880862	0.009418751594450001	0.0		0.0	0.0	0.000514899916329	0.0		0.009418751594450004	0.0	0.0	0.0	0.017223561832597847	0.0
17880926	0.0170518336921	0.0176204095806		0.359807360765	0.0	0.025786163522	0.0		0.004703585173201441	0.0176204095806	0.0	0.359807360765	0.025786163522	0.0
17881606	0.00149547819097	0.0		0.0	0.0	0.0013460597160999998	0.0		0.00149547819097	0.0	0.0	0.0	0.0010119994217130763	0.0
17883614	0.0819133016775	0.000356529937562		0.0031320547918800004	0.0	0.113372093023	0.0		0.4644740736629528	2.049093720460682	0.0	219.3009018775331	0.06062598866039892	0.0
17880330	0.00115497559237	0.0		0.0	0.0	0.0	0.0		0.00115497559237	0.0	0.0	0.0	0.0022204713129411703	0.0
943010030	0.991656365906	0.305828560784		0.455959622108	0.0	0.568232662192	0.0		0.1222804919122944	2.456316947090939	0.0	7.697993890362	0.22980431510292315	0.0
17880512	0.027947417683000002	0.0		0.0	0.0	0.000985915492958	0.0		0.027947417683000002	0.0	0.0	0.0	0.002655014104760161	0.0
17880546	0.004367500138340001	0.0		0.0	0.0	0.0580723215486	0.0		0.009403138602516556	0.07464399984739999	0.0	0.1128985968826	0.04925015841725882	0.0
17884294	0.35230591821400004	0.000238198939769		0.0425336628559	0.0	0.6065573770489999	0.0		0.5620235489968655	2.0499255995994683	0.0	219.40214771640896	0.06180603900930973	0.0
17880256	0.0	0.0		0.00940325938063	0.0	0.0	0.0		0.0	0.000438040033259	0.0	0.30745760669053	0.001555209953344187	0.0
17880524	0.00535332240296	0.0		0.0	0.0	0.0	0.0		0.005353322402960001	0.0	0.0	0.0	0.0009426181218347336	0.0
17881582	0.160468202404	0.0		0.0	0.0	0.00969305331179	0.0		0.027870057267106764	0.0	0.0	0.0	0.0040583525282454815	0.0
17880868	0.0108159089684	0.0		0.0	0.0	0.00687528988077	0.0		0.009800585731650246	0.0968364146828764	0.0	0.4066813459208764	0.03562912871826621	0.0
17880550	6.9156716462e-05	0.0		0.0500218573416	0.0	0.00015642108556200002	0.0		6.9156716462e-05	0.01360234296226	0.0	1.4146838099736	0.008965756594179105	0.0
17880628	0.00509768006233	0.0		0.0	0.0	0.0	0.0		0.00509768006233	0.12548607035	0.0	1.23512340566	0.006340474811809829	0.0
17880856	0.00365192783184	0.0		0.0	0.0	0.00034387895460800017	0.0		0.001982046684395432	0.005089058540760001	0.0	0.521628500428	0.0012733784321548255	0.0
17880290	0.006960131531249999	0.0011227481591		0.0221603553709	0.0	0.00936037441498	0.0		0.008447909345188584	0.042966089291405996	0.0	0.942632476193	0.03878454725912192	0.0
17884298	0.0536322628369	0.000680239510075		0.188962146648	0.0	0.0485044462409	0.0		0.10906462237271997	0.0026293238443082	0.0	2.5074140817640003	0.03074910042528121	0.0
17881726	0.055395259582099995	0.0		0.0	0.0	0.00691562932227	0.0		0.011450360973474726	0.0022268431348508	0.0	0.039745257345234	0.015707597039707085	0.0
17880836	0.0029560742701699996	0.0		0.0	0.0	0.00413412953606	0.0		0.0020291261819833173	0.0	0.0	0.0	0.011818056891571395	0.0
17880268	0.0	0.0		0.000274037272902	0.0	0.0	0.0		0.0	0.0	0.0	0.000274037272902	0.0072126570497856035	0.0
17881706	0.000191101054116	0.000737721566111		0.260876788816	0.0	0.00137007154818	0.0		0.00019110105411600004	0.093870803568251	0.0	1.4223985685093998	0.024680475980602856	0.0
17880670	0.0175478242953	0.0		0.0	0.0	0.0176870748299	0.0		0.017554222392445758	0.0	0.0	0.0	0.008272215589283937	0.0
17880588	0.0030560003247699996	0.0		0.0	0.0	0.0025655326268800003	0.0		0.002961386057368978	0.0	0.0	0.0	0.018841893649729744	0.0
17880674	0.0047407489277	0.0		0.37428619765	0.0	0.0	0.0		0.0047407489277	0.00405398149996	0.0	1.4146661293599998	0.005960770994312289	0.0
17881772	0.141625707612	0.000617601632257		0.112815231492	0.0	0.00366748166259	0.0		0.059376789201689775	0.0013381368698902	0.0	0.5197117735437	0.0028760947297488885	0.0
17880918	0.008113492132579999	0.0		0.0	0.0	0.0	0.0		0.008113492132579999	0.0	0.0	0.0	0.0047101797558395395	0.0
17880584	0.015817628428	0.0		0.0	0.0	0.0	0.0		0.01444277125159307	0.0	0.0	0.0	0.0009201324990810543	0.0
17880864	0.0025557063156999996	0.000175216013304		0.137018922404	0.0	0.0016962682099400002	0.0		0.0025557063156999996	0.010489352127484	0.0	0.89483256062979	0.02305768660194389	0.0
17883632	0.10988533631	2.04829818433		219.21778496	0.0	0.0601922225281	0.0		0.11005999729430499	2.050927508174308	0.0	221.725199041764	0.05684971113599181	0.0
17880258	0.0	0.0		0.00178124227386	0.0	0.0	0.0		0.0	0.0	0.0	0.00178124227386	0.0	0.0
17881748	0.006203741695449999	0.0492053334601		0.721597341108	0.0	0.031815470272400004	0.0		0.003977964538212653	0.09313308200214	0.0	1.1615217796934	0.03790037123369668	0.0
17881662	0.026724644726999997	0.0		0.0	0.0	0.00558659217877	0.0		0.029158319243364636	0.0	0.0	0.0	0.0037425927851131736	0.0
17881698	0.00037044999016100003	0.0127567920135		0.935630541469	0.0	0.00170250896057	0.0		0.00037044999016100003	0.1484426707025	0.0	2.016478737529	0.01723646723647359	0.0
17880574	0.00692189238827	0.0		0.0	0.0	0.0029636947394400003	0.0		0.009126715994300786	0.12548607035	0.0	1.23512340566	0.007115327601537611	0.0
17880552	0.0	0.0		0.0	0.0	0.0	0.0		0.0	0.0	0.0	0.0	0.00013504388926392606	0.0
17881612	0.0792967570788	0.0		0.0157687984756	0.0	0.0	0.0		0.014082359560418369	0.0058872855879558	0.0	0.17524580319872002	0.014089595375710662	0.0
17880280	0.00529924842482	0.0		0.0	0.0	0.0	0.0		0.00529924842482	0.0025445292703800003	0.0	0.0101781170815	0.0001454122437112549	0.0
17880630	0.7637680983239999	3.19185846722		6.47450019641	0.0	0.383205521472	0.0		0.7524816624896258	3.2385836301942903	0.0	6.5509120842387	0.4362178291679955	0.0
17881770	0.0458242772174	0.000205867210752		0.00910962407579	0.0	0.0127952755906	0.0		0.03053722492698221	0.000823468843009	0.0	0.3636644277937901	0.003203892135630877	0.0
17884296	0.141512575617	3.65671730833e-05		0.0570895558121	0.0	0.0484848484848	0.0		0.4990022339305488	2.0491302876337647	0.0	219.35799143334518	0.06061413165713784	0.0
17881694	0.000117353135205	0.000441088872321		1.5901415412600002	0.0	0.0837831494954	0.0		0.0004497304102999571	0.15092086457436688	0.0	11.9518517932	0.015262744562428241	0.0
17880456	0.0753333511187	0.0030104584875500005		0.53833673663	0.0	0.06260575296109999	0.0		0.009682227028152005	0.0155540355189904	0.0	1.714704225081911	0.02650838986075976	0.0
17880526	0.000308815949441	0.00242509155942		0.388160137649	0.0	0.00599914297957	0.0		0.000308815949441	0.020905961719085	0.0	2.487715113801011	0.016462167689161943	0.0
17880866	8.68767184024e-05	2.9202668884e-05		2.9202668884e-05	0.0	0.0013447812144400002	0.0		8.68767184024e-05	0.007715098583503999	0.0	0.7274136599175741	0.017036370903264684	0.0
17880314	0.0	0.00014601334442		0.107728645513	0.0	0.0007944073721	0.0		0.0	0.038989974076656	0.0	0.9864431440198	0.029120845364630787	0.0
17881802	0.0	0.0		0.0	0.0	0.0	0.0		0.0	0.0102308311034	0.0	0.283900340204	0.028645573410535544	0.0
17881690	0.020875059735900002	0.0		0.0	0.0	0.00129254631624	0.0		0.019391735518515425	0.0	0.0	0.0	0.0049652889522303	0.0
17880350	0.0005869750572490001	0.016632549115500002		4.09904363856	0.0	0.00120948234156	0.0		0.0005869750572490001	0.07844253576339999	0.0	6.400233954100001	0.009323747472482359	0.0
17880370	0.000561849668457	0.0		0.0019913702999500003	0.0	0.0	0.0		0.000561849668457	0.00611350682084	0.0	0.42780930027595	0.03792749976700878	0.0
17881632	0.0377618039201	0.0		0.0	0.0	0.000240096038415	0.0		0.03235779687995747	0.0	0.0	0.0	0.0039217764587395395	0.0
17881734	0.00942502159708	0.0		0.0	0.0	0.0	0.0		0.00942502159708	0.0	0.0	0.0	0.0009713453132553099	0.0
17881602	0.004488903717729999	0.0		0.0	0.0	0.00137859727727	0.0		0.004488903717729999	0.0	0.0	0.0	0.005894141223621258	0.0
17880664	0.0	0.0		0.0	0.0	0.00987654320988	0.0		0.002880582580336966	0.0	0.0	0.0	0.006609854692447773	0.0
17882992	0.0	0.050799929886099986		2.5596349589500003	0.0	0.0372200263505	0.0		0.0	0.7594496494201	0.0	18.72712169274	0.040555097902579836	0.0
17881804	0.0	0.0		0.0	0.0	0.000453172205438	0.0		0.0	0.09748279841730001	0.0	2.32689808349	0.02594083939910311	0.0
17881672	0.015379404130000001	0.0		0.0	0.0	0.0	0.0		0.015379404130000001	0.0	0.0	0.0	0.00018212724623575919	0.0
17881676	0.012485147154700001	9.22151957639e-05		0.0124490514281	0.0	0.00106553010123	0.0		0.020360204749871585	0.09358573579813192	0.0	0.26706481613661803	0.02530672282955878	0.0
17881896	0.011959375070700001	0.0		3.76972410872	0.0	0.0	0.0		0.003299329156042732	2.0429240282989998	0.0	116.48155952882	0.027786239958991224	0.0
17881794	0.0	0.0		0.0	0.0	0.0	0.0		0.0	0.0788798781077378	0.0	1.3534299434813002	0.0337852693294131	0.0
17880834	0.006435605062930001	0.0		0.0	0.0	0.0	0.0		0.0036574860005875055	0.0	0.0	0.0	0.011892270024477056	0.0
17883036	0.0	1.51378781084e-05		0.06345821705509999	0.0	0.0588235294118	0.0		0.0	0.1409801619866084	0.0	2.2928568026851	0.06313319825103626	0.0
17880826	0.0126460051733	0.00440960300148		0.240394727194	0.0	0.006930907515699999	0.0		0.0126460051733	0.0050520617169270005	0.0	0.32046844527380003	0.005694234971834006	0.0
17880506	0.000269210809747	0.0		0.0350279001032	0.0	0.0	0.0		0.00031173317519532615	0.08211567071705	0.0	1.6452330433881697	0.08594114899575002	0.0
17880850	0.00423334103287	0.00116810675536		0.211854897134	0.0	0.0034681324434000004	0.0		0.004302882338150944	0.005623373352134	0.0	0.3945609192797	0.004084014002329742	0.0
17882926	0.0687168867197	0.0		0.0	0.0	0.0016624412950399998	0.0		0.060064524371612776	0.0	0.0	0.0	0.0025482344375673824	0.0
17880922	0.014362172734399999	0.0		0.0	0.0	0.000957130623142	0.0		0.014362172734399999	0.0	0.0	0.0	0.0029455579631630265	0.0
17881732	0.21263898605599998	3.72453905584e-05		0.000148981562234	0.0	0.047619047619	0.0		0.06149352017982401	0.09016469354176042	0.0	0.162328455640952	0.028169014084536963	0.0
17880604	0.0109959226067	0.0		0.0	0.0	0.000104690117253	0.0		0.0109959226067	0.12548607035	0.0	1.23512340566	0.0054373700167851344	0.0
17880306	0.000363311424065	0.0		0.0	0.0	0.0	0.0		0.0003406876357532601	0.01781170489266	0.0	0.989821886178	0.0031683168316852628	0.0
17882946	0.03802566326430002	0.0		0.0	0.0	0.000312915591019	0.0		0.03802566326430002	0.0	0.0	0.0	0.0012587999440534048	0.0
17882968	0.000497015214783	0.000411734421505		0.0283743914224	0.0	0.00539014373717	0.0		0.03732288997783503	0.006776701688071999	0.0	2.1632686773904	0.0030815157205471505	0.0
17881816	0.00264266272298	0.0		0.0980672830992	0.0	0.0	0.0		0.00264266272298	0.006364967266566999	0.0	2.2329615690672	0.001995637443729032	0.0
17880386	0.0940449464746	0.0		0.0	0.0	0.777777777778	0.0		0.011029580504376257	0.0968364146828764	0.0	0.4066813459208764	0.08921715364084579	0.0
17880394	0.000229362507804	0.0		0.0	0.0	0.00223513634332	0.0		0.0061312276474356645	0.0968364146828764	0.0	0.4066813459208764	0.08834267831522202	0.0
17881750	3.61640836829e-05	0.0		0.910354093881	0.0	0.0	0.0		3.61640836829e-05	0.04392774854204	0.0	1.3502785324664	0.02565753172705619	0.0
17880354	0.00391840502928	0.00869731501734		0.241094698662	0.0	0.0229684184247	0.0		0.00391840502928	0.5246437212626099	0.0	4.850050921255285	0.1035328308056131	0.0
17880632	0.00766514636639	0.00405398149996		1.04037993171	0.0	0.00699774716402	0.0		0.007231788260760231	0.004465128125953	0.0	1.542252913172	0.02560642570285971	0.0
17882994	0.0	0.127145759521		11.7304487016	0.0	0.034947006588400005	0.0		0.007673813623412695	0.13380943904463	0.0	29.307602910609997	0.00836733639791767	0.0
17881744	0.00235511864898	0.000247645912168		0.000471118255518	0.0	0.4	0.0		0.02152228878712284	0.08797509579746801	0.0	0.124370977042518	0.03142003627444863	0.0
17881740	0.0027556391324	0.0055184248049		0.130244787666	0.0	0.0221232969108	0.0		0.006026398791727859	0.093493520602368	0.0	0.254615764708518	0.02878550403305074	0.0
17881812	0.00567094572728	0.0983757370232		2.08087640043	0.0	0.02639415268	0.0		0.04029979327195688	1.5956272078132	0.0	7.517252494189999	0.16496205872655362	0.0
17881714	0.034945720493199994	0.0		0.0	0.0	0.0	0.0		0.034945720493199994	0.000823468843009	0.0	0.3636644277937901	0.0025496424018493697	0.0
17882918	0.00100966018077	0.0		0.0	0.0	0.00227963525836	0.0		0.0014280944956260705	0.0	0.0	0.0	0.000701530612244821	0.0
17881594	0.007320476664560002	0.0		0.0	0.0	0.00323450134771	0.0		0.007320476664560002	0.0	0.0	0.0	0.0018303285439740594	0.0
17882940	0.018680046524499998	0.0		0.0	0.0	0.00134366925065	0.0		0.018680046524499998	0.0	0.0	0.0	0.0038503150257748367	0.0
17880614	0.8176736704559999	0.8931104931910001		6.54047812906	0.0	0.27360921631	0.0		0.8176736704559999	1.0030147909566691	0.0	6.683399093850371	0.3958461223653094	0.0
17881872	0.0	0.0		1.81915261435	0.0	0.0	0.0		0.0	0.0102797277941	0.0	2.779374150829	0.034421806679682074	0.0
17880412	0.0	0.0		0.0	0.0	0.008810572687219999	0.0		0.0008349958953814885	0.05418825277593	0.0	6.028201786956999	0.07508169934658912	0.0
17881864	0.0	0.00022347234335		0.0625722561381	0.0	0.00348432055749	0.0		0.0	0.015185676951659	0.0	11.073890260167	0.026684846123869642	0.0
17880470	0.000552795594117	0.000477928871987		0.987153365917	0.0	0.0035347398652399993	0.0		0.000552795594117	1.6301358544082871	0.0	9.675642193812	0.13264577548571674	0.0
17881746	0.006293761926010001	0.0		0.166909504333	0.0	0.00157298657718	0.0		0.006293761926010001	0.08772744988530001	0.0	0.29080936312	0.020954268724366502	0.0
17880492	0.00585797341194	0.0		0.0	0.0	0.00162321193061	0.0		0.005646379136524032	0.19183070140789305	0.0	2.175636299155	0.054467757189484614	0.0
17880596	0.00597501011076	0.0		0.0	0.0	0.008756993432249999	0.0		0.0035842236568035275	0.0	0.0	0.0	0.005620633503181445	0.0
17882952	0.0190931887315	0.0		0.0	0.0	0.00116612845353	0.0		0.017478275769345412	0.0022268431348508	0.0	0.039745257345234	0.004433567425686468	0.0
17883622	0.0640939409296	0.000257497171788		0.0778218720689	0.0	0.108365019011	0.0		0.4373633010343328	2.048632059900505	0.0	219.2966042440992	0.060364858262932974	0.0
17880250	0.000344981363051	0.0		0.05405414010419999	0.0	0.0	0.0		0.000344981363051	0.0006424587154469999	0.0	0.2563994328015	0.0011571283930369998	0.0
17881618	0.022911869942	0.0		0.0	0.0	0.0022702991453000003	0.0		0.022911869942	1.24400949648	0.0	4.92876237486	0.005319148936172482	0.0
17880514	0.0	0.00853153457501		0.247874491522	0.0	0.0110240078393	0.0		3.0371566142856768e-05	0.09064720529206	0.0	1.8523292048758293	0.06490139074405975	0.0
17881828	0.00207105493052	0.000111736171675		1.22984300737	0.0	0.000877449546651	0.0		0.0051301938454337784	0.011136371776943002	0.0	3.417619313229	0.023229893822952163	0.0
17880848	4.7270814202000004e-05	0.0010459107707		0.207637134941	0.0	0.0026729391639000004	0.0		4.7270814202000004e-05	0.0397730608274	0.0	1.018480078715	0.03148695540419432	0.0
17881766	0.0308170459099	0.0		0.00725681917902	0.0	0.0	0.0		0.0308170459099	0.0007205352376332	0.0	0.17241378900472	0.0010441138084049176	0.0
17881626	0.00924269284741	0.0		0.0	0.0	0.000283366392746	0.0		0.00924269284741	1.24400949648	0.0	4.92876237486	0.005818365798130631	0.0
17880640	0.0044404185829599995	0.0		0.0	0.0	0.00574094007894	0.0		0.012186996426037105	0.0	0.0	0.0	0.005647881028811374	0.0
17881720	0.015019660382999999	0.0		0.0	0.0	0.00379141390574	0.0		0.04637529593420347	0.0008808175516607998	0.0	0.026580137036933998	0.006398576210850764	0.0
17880920	0.0134034472261	0.0		0.0	0.0	0.00277813951469	0.0		0.0134034472261	0.168205121998	0.0	0.238974350155	0.02099008801398766	0.0
17881752	0.00921284113298	0.00134468846954		0.054100277906400006	0.0	0.00542495479204	0.0		0.0010775559179249062	0.04392774854204	0.0	0.4399244385854	0.042569423252976656	0.0
17880940	0.616142400024	0.0		0.0	0.0	0.3795620437960001	0.0		0.005689971319660784	0.0438556401059	0.0	0.27121972428	0.17249757045723246	0.0
17880466	0.200432793439	0.367373367073		0.386886231499	0.0	0.14878397711	0.0		0.07879926763614746	0.4284984418918929	0.0	1.299146465364	0.11370025151668395	0.0
17880908	0.0148193437273	0.0		0.0	0.0	0.00105177993528	0.0		0.0148193437273	0.0	0.0	0.0	0.0017724782468608626	0.0
17880482	4.17515981179e-05	0.0		0.0	0.0	0.00379565038982	0.0		4.17515981179e-05	0.544615364517	0.0	0.569230748224	0.06145760712192981	0.0
17881760	0.030173604951299997	0.000926402448385		0.0315491500478	0.0	0.0033149171270700005	0.0		0.04545306328740016	0.001749871291394	0.0	0.3952135778415901	0.003221456397961485	0.0
17881790	0.00264936885703	0.0102308311034		0.283900340204	0.0	0.0540591448484	0.0		0.0012065104873882546	1.5074823018934	0.0	5.720276433963997	0.20826281732215546	0.0
17883630	0.0848776281219	5.41051563232e-05		0.248474933486	0.0	0.0262626262626	0.0		0.10899422328204304	0.0019490843342332	0.0	2.318451935116	0.02849569251162627	0.0
17881620	0.050704251966	9.22151957639e-05		0.00350417743903	0.0	0.0013698630137	0.0		0.032946627194956134	0.0058872855879558	0.0	0.15947700472312	0.0145816196814354	0.0
17881674	0.0104399076698	0.00212094950257		0.10558639915	0.0	0.0120061967467	0.0		0.0055715642861555005	0.095614470104938	0.0	0.36020216385851794	0.02727810445010799	0.0
17884302	0.247280735801	0.000105130622615		0.00116557864203	0.0	0.09019607843139996	0.0		0.4594041276413253	2.04873719052312	0.0	219.29776982274123	0.06041011058827879	0.0
17880388	0.000568287032044	0.0		0.0	0.0	0.00569538857248	0.0		0.000568287032044	0.0438556401059	0.0	0.27121972428	0.06160172631423653	0.0
17881788	0.00992786728553	0.0		0.12473481298	0.0	0.0	0.0		0.00992786728553	0.00093113476396	0.0	0.27889348450100004	0.0015659254619461824	0.0
17880400	0.0	0.0		0.0	0.0	0.0	0.0		0.0	0.05418825277593	0.0	6.028201786956999	0.06809929603573554	0.0
17880408	6.05747248221e-05	2.39406908804e-05		1.18914192339	0.0	0.00029033194619200003	0.0		6.05747248221e-05	0.0101899413893984	0.0	1.5886789362185698	0.0184331797235062	0.0
17881578	0.005177390642439999	0.0		0.15390716173	0.0	0.0	0.0		0.009436590552880736	0.0016598735237499998	0.0	0.942347085511	0.001279441698167808	0.0
17880310	0.0007606769959460001	0.0		0.0337990059052	0.0	0.0	0.0		0.0007606769959460001	0.06440866776397	0.0	2.5840236095662004	0.01184150599666352	0.0
17881736	0.0177672580071	1.24400949648		4.92876237486	0.0	0.00944933202998	0.0		0.012209965742181151	1.333330617860658	0.0	5.066298472210819	0.02468082079735694	0.0
17880888	0.0221575248881	0.0		0.0	0.0	0.000179275726067	0.0		0.0221575248881	0.0	0.0	0.0	0.0028579875825362954	0.0
17880300	0.0252224576237	0.0		0.0	0.0	0.078313253012	0.0		0.00958581618088925	0.0	0.0	0.0	0.07148829431442667	0.0
17880448	0.00713480796148	0.0		0.0	0.0	0.00241784811518	0.0		0.008292936592708158	0.0	0.0	0.0	0.01864027655391742	0.0
17880326	0.00799572484838	5.84053377679e-05		8.76080066519e-05	0.0	0.0377358490566	0.0		0.00799572484838	0.2896618588166579	0.0	7.324705870601653	0.08652115864593955	0.0
17880348	0.0010567157384700002	0.0		0.0	0.0	0.000417885499373	0.0		0.0033358022061220683	0.0	0.0	0.0	0.0034156015865989065	0.0
17880564	0.8769139113150001	0.00772055245761		0.0111690658887	0.0	0.657718120805	0.0		0.716575664801958	3.1995790196776097	0.0	6.4856692622987	0.3893387314436025	0.0
17880942	0.26152552263	0.867790726574		1.5246980654299995	0.0	0.273255813953	0.0		0.005418628553485225	1.6296579255363	0.0	8.688488827895	0.20498854985423665	0.0
17881728	0.015482755545700003	0.0		0.0	0.0	0.000235072872591	0.0		0.015482755545700003	0.09016469354176042	0.0	0.162328455640952	0.023994379062031498	0.0
17881670	0.0224029683138	0.0		0.0	0.0	0.0	0.0		0.0224029683138	0.0	0.0	0.0	0.00169115315506067	0.0
17880914	0.00264933132234	0.0		0.0	0.0	0.00399505374298	0.0		0.00264933132234	0.0	0.0	0.0	0.005042301184433635	0.0
17880652	0.0136091119704	0.0		0.011342469079	0.0	0.00113745734535	0.0		0.013609111970400002	0.12548607035	0.0	1.246465874739	0.0054803044081721715	0.0
17880910	0.0007449785203939999	0.0248925616979		0.265192695599	0.0	0.00184569952012	0.0		0.0007449785203939999	0.03689447169925	0.0	0.6966768900042999	0.009995835068742116	0.0
17882956	0.00068310164085	0.0425830600725		0.385824160679	0.0	0.0459923346109	0.0		0.00035281181154578323	0.04429966428142	0.0	1.30421050952752	0.050957155879659335	0.0
17881784	0.00704708621499	0.08772744988530001		0.123899858787	0.0	0.0308292370165	0.0		0.006792813936223425	0.41155813289656	0.0	1.923748896029	0.04025682837344308	0.0
17880500	0.0631201227051	0.0169979516177		0.421028097415	0.0	0.15503875969	0.0		0.0014704561011218422	0.0346183611983	0.0	0.78083545818	0.03241845664279236	0.0
17883020	0.00010002307906899999	0.150416763006		3.11051757795	0.0	0.00290037831021	0.0		8.46513358609573e-05	1.6476682337959998	0.0	9.458725713579	0.07630786989326077	0.0
17881696	0.0198225274864	0.0		0.0	0.0	0.0	0.0		0.0198225274864	0.0	0.0	0.0	0.002845589336528448	0.0
17880294	0.0	0.0		0.0	0.0	0.0	0.0		0.0	0.01781170489266	0.0	0.989821886178	0.0032771215948680103	0.0
17881762	0.0	0.00171660420892		0.006554306979520001	0.0	0.216360856269	0.0		0.0005608555133042619	1.49896807499892	0.0	6.354762442608519	0.21514683153021616	0.0
17881610	0.009044291133440002	9.22151957639e-05		0.309197551396	0.0	0.00016542597187799998	0.0		0.009044291133440002	0.005979500783719701	0.0	0.48444335459472	0.009856675886338352	0.0
17883032	0.0029760790747899997	0.0102797277941		0.960221536479	0.0	0.0624894443506	0.0		0.0013208806728630805	0.02107044865987	0.0	11.921854189503	0.036087837467824006	0.0
17880488	0.00394765534629	0.00611350682084		0.425817929976	0.0	0.0409292035398	0.0		0.003687317522996788	0.09553098952534	0.0	1.898987882739	0.0713929935248411	0.0
17881914	0.0133063268621	0.0		1.33653089162	0.0	0.0	0.0		0.006449827038235746	0.13380943904463	0.0	27.84957537782001	0.010856453558509851	0.0
17881808	0.0124730582699	0.0		0.0	0.0	0.0	0.0		0.0124730582699	0.0009331698893220001	0.0	0.9187295181003999	0.0014406338789079195	0.0
17881796	0.0304856693408	0.0		0.00135004945332	0.0	0.0005242120437719999	0.0		0.0304856693408	0.0	0.0	0.00135004945332	0.002310839746443494	0.0
17882996	0.0658527523503	0.0		0.00793050683569	0.0	0.017560975609799998	0.0		0.03561863688237018	0.0057950703921919	0.0	0.15597282728409	0.01534445938462664	0.0
17880886	0.0137701062066	0.168205121998		0.238974350155	0.0	0.053312788906	0.0		0.009828887919603612	0.2428491218454	0.0	0.35187294703759997	0.0488702978172003	0.0
17883616	0.210381883926	0.000557113025934		0.00162262020785	0.0	0.343490304709	0.0		0.5489528487198285	2.0496874006596992	0.0	219.35961405355306	0.061217257773971676	0.0
17881780	0.0402258011025	1.49725147079		5.436376093759999	0.0	0.381123310811	0.0		0.020365843034685145	3.9535684178809394	0.0	13.134369984122	0.2785524794232723	0.0
17880556	0.0295552979805	0.0		0.0	0.0	0.0013679890560899998	0.0		0.0295552979805	0.0	0.0	0.0	0.006397377603889778	0.0
17881092	0.8613882581479999	0.06887903580350001		0.0833087852079	0.0	0.332880434783	0.0		0.8220612248731978	14.024277213065668	0.0	263.71657205679037	0.14293596510421125	0.0
17881666	0.180132753075	0.0		0.0	0.0	0.0194805194805	0.0		0.035290626805387505	0.0	0.0	0.0	0.005961774504645226	0.0
17881614	0.0317538533559	0.000922151957639		0.328654957702	0.0	0.00138019874862	0.0		0.03087893533453517	0.0068094375455948	0.0	0.48813196242512	0.008663008951769224	0.0
17880902	0.039276213902	0.0		0.0	0.0	0.00794438927507	0.0		0.04011807813898288	0.0	0.0	0.0	0.00405737470712559	0.0
17881712	0.0010231974458	0.0		0.122034953762	0.0	0.00285413850083	0.0		0.0010231974458	0.135685878689	0.0	1.202883149822	0.02537485582469889	0.0
17881608	0.0182331628687	0.0016598735237499998		0.7884399237809999	0.0	0.0017238677323299998	0.0		0.014829387588692112	0.0075471591117058	0.0	0.96368572697972	0.008157281407406626	0.0
17875503	0.000987071564071	0.0548422974462		2.72331307619	0.0	0.0247443762781	0.0		0.0010188431118921912	0.3427060379765	0.0	13.441851136438501	0.06931732058522258	0.0
17880340	9.57282061278e-05	0.0		0.0	0.0	0.00606323083586	0.0		9.57282061278e-05	0.512520184362	0.0	4.551205824716685	0.06466847175871608	0.0
17882954	0.0	0.0043695379863500005		0.321941316637	0.0	0.00511135450894	0.0		0.0	0.006086142195270001	0.0	1.24032766548552	0.029769311764126095	0.0
17876157	0.0930795828947	0.00425882509444		0.0749864928657	0.0	0.0246609124538	0.0		0.036734784381806114	0.08419345342550999	0.0	1.0886023075437	0.016681385536238387	0.0
17875413	0.0876758938278	0.00323506010818		1.9416150565	0.0	0.0437447757035	0.0		0.05138765452172394	0.004561734770046439	0.0	5.6221708689252115	0.04029181942742694	0.0
17877569	0.000420425379567	0.0		0.0	0.0	0.00230414746544	0.0		0.000420425379567	0.047356731433	0.0	0.362173205707	0.029703300737599275	0.0
17875539	0.0	0.0260590532016		0.0606896343415	0.0	0.220630372493	0.0		0.0007334606874468593	4.6428646597525995	0.0	44.6981683505615	0.07626588872680504	0.0
17875361	0.0018619137476700001	0.0		0.28202886181	0.0	0.00971942050248	0.0		0.019952274240311558	0.0001017992933612	0.0	0.290675234049358	0.011000733382229951	0.0
17881836	0.0228971322638	0.0		0.558656911482	0.0	0.0	0.0		0.04377966313768624	1.5956272078132	0.0	9.236112819211998	0.11971746677844702	0.0
17875407	0.070335136637	0.0		0.00460230706813	0.0	0.005247191932439999	0.0		0.070335136637	0.0102898745608	0.0	4.05446571458813	0.008649403674657821	0.0
17880880	0.447348995106	0.0707483188453		0.481267486735	0.0	0.333333333333	0.0		0.07329562952686901	0.7618671989623002	0.0	7.163790762465	0.20425398811354306	0.0
17875445	0.0588508339396	0.0		0.0035925299012	0.0	0.0	0.0		0.0588508339396	0.00024300476479782002	0.0	0.021259633071619	0.006254295532647355	0.0
17880684	0.009870707204450001	0.0		6.63602541205	0.0	0.0	0.0		0.20818840865747554	0.000693139656505	0.0	7.804435433410001	0.005307599517489608	0.0
17876263	0.163548208975	0.0		0.0	0.0	0.0	0.0		0.0557632497407361	0.0	0.0	0.7338502965289	0.014646197282507854	0.0
17877563	0.0825155195192	0.0311386940884		0.0395545573556	0.0	0.502958579882	0.0		0.004532143301142842	8.878304757897402	0.0	141.3870817600066	0.1815053593325493	0.0024002116649898693
17875247	0.0	0.0		0.0006225203978830001	0.0	0.0	0.0		0.017356749723033454	0.04448106209752	0.0	0.391207980573783	0.058170685036374986	0.0
17875327	0.0228229417968	0.0		0.124066278222	0.0	0.00223229385105	0.0		0.02198706735627855	0.01514248922468	0.0	0.8087907128498709	0.004306907002713	0.0
17883000	0.132197547499	0.0		0.0	0.0	0.0	0.0		0.1049105159400684	25.506805730297604	0.0	144.45129570758908	0.22180697613411685	0.0
17875289	0.026521842224300003	0.0946405576542		0.588191065821	0.0	0.08703843255460003	0.0		0.02908816318305747	0.13722880859861	0.0	1.4590784763562998	0.057667629130549125	0.0
17875695	0.061113738433600004	0.0		0.0230928373639	0.0	0.0005608524957940001	0.0		0.06734906692635757	0.00167282356415	0.0	3.4807691515340298	0.015509905293500425	0.0
17883596	0.09054531912460001	0.424411221826		4.4390986792	0.0	0.113593155894	0.0		0.08606315234807366	0.4264443201680536	0.0	5.1954192845479605	0.11397141360501616	0.0
17880650	0.0015587282298599999	0.00274679216636		0.0224531359654	0.0	0.0832061068702	0.0		0.0011517721105419	0.016122471630292	0.0	0.81765353200917	0.015912766734500598	0.0
17875333	0.015340524494600001	0.00851765018888		0.209504089056	0.0	0.0442477876106	0.0		0.006870087217106748	0.04740008421728	0.0	1.5707492332269999	0.03484949197607399	0.0
17877617	0.032203869319199996	0.00250923534622		0.034641387974300004	0.0	0.0256321440942	0.0		0.022180308008407142	0.011744615439958	0.0	0.14396737798969594	0.041234405778049	0.0
17877755	0.0233879734387	6.58063981973e-06		0.00097393469332	0.0	0.00236034618411	0.0		0.01813489034167265	6.580639819733001e-05	0.0	0.005600124486593	0.03259588951433278	0.0
17876459	0.024241364597800002	0.5887320858330001		1.46115936015	0.0	0.269984917044	0.0		0.009430358180921193	11.516099645532998	0.0	971.44003355015	0.1618782923435353	0.0
17875303	0.0655083514777	0.0033124195179000003		0.08139087958260001	0.0	0.00847835787595	0.0		0.07523345838446069	0.01514248922468	0.0	0.6842512318395999	0.005998033431662342	0.0
943010035	0.969629486829	0.25206219207		1.5628452589700002	0.0	0.153278138286	0.0		0.969629486829	24.709138960631023	0.0	134.1945257106233	0.2025057915586263	0.0
17881682	0.216728879727	1.28408040282		8.39161919058	0.0	0.17299164987	0.0		0.1840340829564477	26.79073763991218	0.0	152.8243007709994	0.21797195511062528	0.0
17880462	0.08148373344589999	8.36238468764e-05		0.00117073385627	0.0	0.0021598272138200003	0.0		0.05445283262593489	0.0013310089416334	0.0	0.7027379305999111	0.10685689328888084	0.0
17883012	0.0	0.00311096795485		3.47464318069	0.0	0.0125170926686	0.0		0.0037896033389178533	0.15359074365689587	0.0	13.836353432629998	0.006052181970877612	0.0
943010076	0.9984213437459999	0.00119668053776		0.00129276437656	0.0	0.848854961832	0.0		0.9650570871132562	25.508229518090697	0.0	144.43447223377882	0.22631541329632435	0.0
17877623	0.0059926790434000005	0.8658238119059999	0.7013299624959999	0.934607795698	0.0	0.0719328372448	0.0	0.04665032195462245	0.006336464950614934	4.762256059786	4.250960477126	5.138246103188	0.06716417910448129	0.058912795996961365
943010034	0.702731938961	1.41617663709		2.93576495199	0.0	0.350953496153	0.0		0.702731938961	1.522137029956939	0.0	3.5153430298040003	0.22488658457593705	0.0
17881644	0.104573083563	0.210517035988		2.9301683049	0.0	0.123248145095	0.0		0.104573083563	25.717322766285594	0.0	147.38146401248912	0.21641799454560007	0.0
17875457	0.0311183566988	0.00157624712301		0.650207340252	0.0	0.108375303115	0.0		0.07634394817555387	3.0741140526630097	0.0	23.298904338152	0.05460914454274518	0.0
17881652	0.9100541215090001	4.3674472181e-06		0.0271551363785	0.0	0.171428571429	0.0		0.3846334660183968	0.0259462122739881	0.0	0.5508538022898011	0.4728584876058132	0.0
24612150	0.11698392009000001	0.0		0.0605699568987	0.0	0.0	0.0		0.11698392009000001	0.00946405576542	0.0	1.4532057627786998	0.00512477718359826	0.0
17880558	0.900373196206	0.8614136384569999		1.5207940076	0.0	0.370605579496	0.0		0.4827423543081562	1.012827074852152	0.0	1.85678494722033	0.4032670974031595	0.0
17882974	0.0029663117324	0.0024477533806900004		10.801961663699998	0.0	0.00247879973907	0.0		0.002074520099712665	0.65330251859969	0.0	69.567042536182	0.027146464646495595	0.0
17875675	0.0342733334889	0.0014967579772899998		0.169998249836	0.0	0.023021861095	0.0		0.05072155390792345	0.0014967579772899998	0.0	0.2578793253599	0.014975471210955731	0.0
17884306	0.00222233292106	0.000178264968781		0.00149011230314	0.0	0.11963190184	0.0		0.02744623352407965	0.32370846991108304	0.0	13.07795150588797	0.1174472494894481	0.0
17875565	0.0	0.00106911284092		0.228362502821	0.0	0.00424808836024	0.0		0.022303992652781823	0.01475375720474	0.0	0.849730885966	0.01012088838911164	0.0
17875495	0.116236931428	6.56769634588e-06		0.0157362004447	0.0	0.001295672454	0.0		0.11555287220880753	0.00017404395316588	0.0	0.0500688330928	0.003544155796702196	0.0
17880444	0.622143175612	0.0607139281929		0.211612899437	0.0	0.435897435897	0.0		0.005622121723423954	0.061125074818893003	0.0	0.912260233865	0.11178719088873107	0.0
17880560	0.7566813360879999	0.000154411049152		0.00303675063333	0.0	0.0508474576271	0.0		0.8984757432635285	0.159133988852762	0.0	0.34716000550903003	0.4569892473118631	0.0
17875645	0.00104038914924	0.08192463830350001		7.958133968119999	0.0	0.0261569416499	0.0		0.0028301820193982127	1.3474713107307	0.0	70.44408802489001	0.08333333333336547	0.0
943010037	0.9265180658140001	0.0147953222991		0.6839908399660001	0.0	0.121036176865	0.0		0.9439332986370006	24.4570309415991	0.0	132.627693505966	0.2048940521501061	0.0
17877869	0.00328423206349	0.00232625685749	0.000373862709239	0.27071814179000003	0.0	0.022630432724200004	0.0	0.006725762409929843	0.014603878229683684	8.88063101475489	0.000373862709239	141.65779990179658	0.1346947885282089	0.0036746827457094055
17876195	0.0514889486822	0.0110675596279		1.4502138431099998	0.0	0.017235798672900003	0.0		0.039661866009151565	0.0121348102841058	0.0	4.022000777126	0.024791408838656426	0.0
17881832	8.68227169974e-07	7.44907811168e-05		0.134873437892	0.0	0.00754716981132	0.0		0.005885628813634628	0.0067746665627098	0.0	3.836810373932	0.003320880033207405	0.0
17876271	0.000252627009655	0.0964454882997		0.5263209361069999	0.0	0.165585819282	0.0		0.0007512295184838548	4.5372195386703	0.0	42.9482406362485	0.08362124811047257	0.0
17875513	0.024196290301599997	0.007269967318279998		2.68811684586	0.0	0.0209513023783	0.0		0.01742935137793079	0.36569944745308	0.0	7.7075478808027125	0.0191547582852025	0.0
17875515	0.0338384933967	0.0		0.00625028560171	0.0	0.0528541226216	0.0		0.009072259713305109	0.3584294801348	0.0	5.01943103494271	0.01794349707303268	0.0
17877631	0.0	0.0		0.00618950485295	0.0	0.0	0.0		0.018259570163755283	0.5677680237748001	0.6885988271131329	0.95793282759415	0.03850582985459665	0.04246934988990298
17877641	0.07918465656910001	0.000418205891037		0.007388304074989999	0.0	0.0560975609756	0.0		0.025812004409459088	0.005785181492676999	0.0	0.19014427845829002	0.01766685361749415	0.0
17884292	0.301533966455	5.84070107834e-05		0.00102886195918	0.0	0.08085106382980001	0.0		0.7203456643059435	2.0504416085885206	0.0	219.92204763499814	0.06162937457468391	0.0
17880460	0.960701823597	0.000585366928135		0.000585366928135	0.0	1.0	0.0		0.07048336050232568	0.001247385094757	0.0	0.7015671967436411	0.11050847457647052	0.0
17875415	0.014548322474	0.0		0.0	0.0	0.0213903743316	0.0		0.06047689300023092	0.0102898745608	0.0	4.04986340752	0.010307219048387628	0.0
17880464	0.44777722908	0.00518467850634		0.0170397163165	0.0	0.364705882353	0.0		0.05795746509418012	0.006432063601097	0.0	0.718606913060141	0.11372257344757578	0.0
17875255	0.0	0.0		0.002592150704	0.0	0.0277777777778	0.0		0.016238162200603798	0.07098041824072	0.0	0.9043474417699	0.04291559615567074	0.0
17877395	0.0651131975491	0.0208051285263		0.932077416805	0.0	0.1893158388	0.0		0.25684380551721553	11.5369047740593	0.0	972.372110966955	0.16219008264417695	0.0
17880690	0.35094593558	0.450226093362		4.50316150472	0.0	0.0502834606852	0.0		0.35094593558	1.447227355649	0.0	8.591483831269999	0.0742744399184326	0.0
17882990	0.0	1.40601766911		4.65270304152	0.0	0.0267932489451	0.0		0.0	2.114667388644	0.0	20.82018977531	0.03435894261126765	0.0
17882934	0.48014920540899997	6.7930842500300015		7.70489199075	0.0	0.54538973384	0.0		0.37778205209538346	6.819489044261888	0.0	8.4293852380838	0.4993842364529769	0.0
17876153	0.042796241754400006	0.00520523067098		0.146085229295	0.0	0.00477941176471	0.0		0.01983266250591319	0.07807846006469	0.0	1.4088229842306998	0.02693366438172106	0.0
943010033	0.902360452958	0.10536310535		0.477323593234	0.0	0.153881700555	0.0		0.7178054124369969	24.562439873911014	0.0	133.10900404488729	0.2025713325237108	0.0
17875321	0.00268824342947	0.00141960836481		0.0127764752833	0.0	0.153846153846	0.0		0.0023290299250282127	0.048819692582089985	0.0	1.5835257085102998	0.035434186903527086	0.0
17881604	0.031302284830299995	0.997001262287		4.0883223265499975	0.0	0.15673538548399998	0.0		0.2789081194328075	1.320709732198083	0.0	17.471119175877966	0.12016800186701874	0.0
17880486	0.0081559583107	0.130705626589		1.26337606529	0.0	0.0180486974289	0.0		0.004767425253153284	0.19183070140789305	0.0	2.175636299155	0.08233468863698767	0.0
17881628	0.569140845431	0.253823657897		3.88518718137	0.0	0.5398409480740001	0.0		0.569140845431	3.176744742107	0.0	14.41012466417	0.5038074517270749	0.0
17875429	0.0406357821281	2.62707853835e-05		0.00358838043121	0.0	0.0280963302752	0.0		0.0615664631260666	0.0013233908136935002	0.0	3.6796823088112105	0.041086812458535266	0.0
17875399	0.0013570701130399998	2.95546335565e-05		0.000752001231604	0.0	0.0124013528749	0.0		0.0006519744011524736	0.004591289403602939	0.0	5.622922870156816	0.03940480458941721	0.0
17876457	0.509047393236	0.029794989352000006		0.0500758694816	0.0	0.558612440191	0.0		0.1713850627813035	1.069630790502	0.0	11.784989237081597	0.4324259214643281	0.0
17875715	0.0	0.0		0.00207876204513	0.0	0.21	0.0		0.0060614641268234536	0.00167282356415	0.0	2.7469188550051302	0.01576451751955581	0.0
17880636	0.000211342438661	0.162753667702		18.0669996538	0.0	0.007909306617449999	0.0		0.21335598054027927	0.162753667702	0.0	24.70302506585	0.007257245149738219	0.0
17881684	0.055220882304	0.000192167677596		0.0186621690891	0.0	0.08465608465610001	0.0		0.10135991451957052	25.506805730297604	0.0	144.45129570758908	0.22196573855351	0.0
17876475	0.135205430994	3.0490629790900003		23.4732632845	0.0	0.195923162269	0.0		0.15674593226038785	5.6737251605959	0.0	27.0449721830159	0.22631536958031315	0.0
17881840	0.0144540976925	0.0		0.661419673997	0.0	0.0	0.0		0.006189617420927637	0.0067746665627098	0.0	4.498230047928999	0.003025718608168169	0.0
17880934	0.18985421403	0.6911188801170001		6.68252327573	0.0	0.189155195304	0.0		0.13946262289554445	0.7805363628215001	0.0	7.871278843883999	0.14501257334436812	0.0
17875437	0.0797910862423	9.85154451882e-06		0.000288978639219	0.0	0.0140186915888	0.0		0.06848271406466812	0.0005648218857458201	0.0	0.015276461700529	0.021934299122636544	0.0
17875363	0.0	3.28384817294e-05		0.000210166283068	0.0	0.0160361842105	0.0		0.004148431900342574	0.0111693589212612	0.0	1.4588602153493575	0.01483747260773109	0.0
17876167	0.028952420487000002	0.00709804182407		0.245119044324	0.0	0.005171299288949999	0.0		0.04254723062203696	0.07003401266416001	0.0	0.8820499973375	0.057138561010438585	0.0
17875357	0.0195455654288	0.000946405576542		0.0511059011333	0.0	0.00446740192657	0.0		0.030594925633814024	0.0009792440582714	0.0	0.333344929226368	0.008240297713980618	0.0
17884282	0.25108535896699996	6.28998577668e-05		0.0572211071531	0.0	0.07142857142860001	0.0		0.5552796764457739	0.0021479171055039	0.0	0.771624172454874	0.10373364126241838	0.0
17876203	0.0535255639511	0.00044660335152		0.0192105118117	0.0	0.0189619274242	0.0		0.06664714588876917	0.0010606829598605	0.0	0.035153594691306495	0.020330593122982743	0.0
17875395	0.030615354277	0.0127097639311		2.87768234386	0.0	0.0478208232446	0.0		0.0620823506783329	0.01727149870114644	0.0	8.499853212785213	0.04145936981754897	0.0
17876463	0.30666761426100003	2.56560423938		3.51265095639	0.0	0.557720409157	0.0		0.14964646751692615	14.1025090134393	0.0	975.8847619233452	0.17876165792490234	0.0
17881660	0.951871329588	0.0140972944082		0.28357904744600004	0.0	0.168763102725	0.0		0.4369849312871951	1.081606697383578	0.0	12.776265924553563	0.3271283436209764	0.0
17876227	0.0022471890901	4.24935579814		32.229702576	0.0	0.0539861895794	0.0		0.01915663823516184	5.5149024705672005	0.0	94.71565663277	0.08381011824267992	0.0
17880468	0.06903966832189999	0.0116237147158		1.1742768922799998	0.0	0.0215432418436	0.0		0.028186989797580726	0.0129547236574334	0.0	1.8770148228799104	0.07164536399788839	0.0
17875425	0.009184912027290002	0.0		0.0	0.0	0.0390189520624	0.0		0.05754862753862652	0.0102898745608	0.0	4.04986340752	0.009012626600636323	0.0
17875233	0.09745205723539999	0.00709804182407		0.409162387834	0.0	0.0100551410963	0.0		0.06892590256024635	0.11826405418107001	0.0	1.2667642595479	0.029160994483041432	0.0
17875311	0.157798473143	0.0		0.0979529771721	0.0	0.0	0.0		0.157798473143	0.01324967807158	0.0	2.1279929388561003	0.002717031146456271	0.0
17875467	0.0272616077113	0.000131353926918		0.00173387183531	0.0	0.0461409395973	0.0		0.0690212921292271	0.001119792226974	0.0	1.20071491493711	0.03216577746847693	0.0
17877709	0.014675438152100003	0.0		0.0	0.0	0.032640332640299995	0.0		0.014488497078481438	0.0	0.0	0.0	0.0199578624784706	0.0
17881090	0.971120336496	0.0007499869752789999		0.0007499869752789999	0.0	1.0	0.0		0.6187671151370537	13.956148164237447	0.0	263.63401325855784	0.14238024835845378	0.0
943010032	0.671873250098	0.000597287516939		0.10225448458	0.0	0.0502512562814	0.0		0.5761069530836348	0.105960392866939	0.0	0.5795780778140001	0.14515446466399431	0.0
943010080	0.0064559746677299995	0.0		0.675485190453	0.0	0.0	0.0		0.0009651739690781174	0.0082222297824	0.0	1.4273848249919998	0.008176100628934044	0.0
17875527	0.005531017714439999	0.00962201556831		0.310898014141	0.0	0.013603385731600002	0.0		0.0036087981458318577	0.36805149570310997	0.0	5.330329049083709	0.016657710908116033	0.0
17877701	0.00309241179535	0.000789265719504		0.199434985228	0.0	0.003609456776760001	0.0		0.00309241179535	0.022847165564614	0.0	0.5369083907675999	0.04234991191219617	0.0
17875315	0.00161685856623	0.0264993561432		0.513761981594	0.0	0.0274253731343	0.0		0.002081549707742825	0.07531904872529	0.0	2.0972876901043	0.03274164209997335	0.0
17877881	0.0180410341585	0.0		0.116226387217	0.0	0.005803298717170001	0.0		0.0180410341585	0.0	0.0	0.116226387217	0.013340676825175472	0.0
17875259	0.0083049862227	0.0283921672963		0.224771324429	0.0	0.0558446063129	0.0		0.011577231945419372	0.03738302027344	0.0	0.6142172191765	0.08796968230926958	0.0
17875443	0.10374175045	0.00044660335152		0.00904043402011	0.0	0.0357368089132	0.0		0.0716697415516987	0.00089320670304	0.0	0.02825094583181	0.023345234825637683	0.0
17876467	0.443220272412	0.059057942125900015		0.059057942125900015	0.0	0.784615384615	0.0		0.13564036679283928	2.6454673100322004	0.0	4.5037863153209035	0.4854906452841194	0.0
17877621	0.0	0.000581564214372		0.0508868687575	0.0	0.0270758122744	0.0		0.0	0.002907821071862	0.000373862709239	0.3216050105475	0.023234885052796292	0.005811239205699834
943010066	0.9412298910160001	0.0		0.0	0.0	0.0819672131148	0.0		0.3917251858697332	0.04142504479476	0.0	0.08052618416245999	0.3788063337395219	0.0
17877601	0.011401236703700001	0.00338049761922		0.199868400887	0.0	0.0201516640921	0.0		0.007055687417153174	0.012615877712958001	0.0	0.309194390902396	0.03163438028961516	0.0
24612202	0.09155483105550001	0.0		0.000508996466806	0.0	0.0	0.0		0.09155483105550001	0.00017404395316588	0.0	0.050577829559606005	0.003515894015728819	0.0
17880544	0.823183815614	0.10771363196		0.7903005836	0.0	0.313116370809	0.0		0.2292503354229809	0.969127270417	0.0	2.3110945912	0.3524933975452099	0.0
17877613	0.00018416676442900004	0.000940963254834	0.000836411782075	0.0302830403853	0.0	0.0215581643543	0.0	0.014253393452377737	0.00039225883276888443	2.2478460958488338	2.129645711090076	4.194322664974299	0.041538372160553706	0.04303187704661008
17875653	0.0351369766131	0.0		0.08238587570669999	0.0	0.0	0.0		0.016842042795500063	0.3438041429907	0.0	16.232778961996697	0.052230160262595256	0.0
17883590	0.166435680379	0.000246813102422		0.111442543013	0.0	0.045757864633	0.0		0.166435680379	0.323041103686422	0.0	13.186660652713	0.11162262006291794	0.0
17875587	0.028987240960400007	0.0		0.7263552641230001	0.0	0.0	0.0		0.028987240960400007	0.01475375720474	0.0	1.5760861500890002	0.006520557869963793	0.0
17884280	0.7954109936220001	0.000970454948401		0.119105789475	0.0	0.153685674548	0.0		0.5484525879989031	0.0038879416993054202	0.0	1.6297194259734216	0.09133932796971006	0.0
17883016	0.00015908745981799998	6.30126960459e-05		7.251192673989999	0.0	0.004800349116300001	0.0		0.00014584325357863207	1.6477312464920455	0.0	16.709918387568994	0.0566974837686872	0.0
17875287	0.00355916920488	0.0231869366253		0.217172998964	0.0	0.0487293686141	0.0		0.0034938174374576987	0.06577518756971	0.0	1.0880604094993	0.0403571103215714	0.0
17882932	0.307421983483	1.1791575611		3.93039944074	0.0	0.191531340112	0.0		0.32197676887946197	7.997449924824131	0.0	12.358491914447244	0.33876476447959153	0.0
17875257	0.0068732984189099995	0.072836586507		0.6044534268439999	0.0	0.0188978878831	0.0		0.015297923693503732	0.14381700474772	0.0	1.5062087179099	0.03398291832069171	0.0
17875731	0.26481248210499997	0.228103008092		0.323809591151	0.0	0.624721603563	0.0		0.024632912500133525	8.847166063809	0.0	141.347527202651	0.17934219957015154	0.0024163634437341266
17877659	0.018791891643000002	0.0038684044921		0.328535577901	0.0	0.00815809831915	0.0		0.018791891643000002	0.009653585984777	0.0	0.5186798563592899	0.01224063892121629	0.0
943010075	1.0	0.00114863861836		0.00150676929024	0.0	0.746875	0.0		0.4706760991246413	25.50937815670905	0.0	144.43597900306906	0.2282922140338037	0.0
17875339	0.034414719060199994	0.00520523067098		0.277770036715	0.0	0.00377765785213	0.0		0.07769271866183043	0.020347719895659998	0.0	0.9620212685546	0.005405015854713161	0.0
17877723	0.07949795134689999	0.0		0.017156144324000002	0.0	0.0533980582524	0.0		0.02621490110089051	0.003946328597517	0.0	0.4174384850161301	0.025833975232559408	0.0
17875561	0.00033360701534099993	0.16535919902899998		10.1315274898	0.0	0.0433694745621	0.0		0.00026700694011280994	4.6765945018562	0.0	50.55348918397	0.06260041312828571	0.0
17880568	0.128117047449	46.1334361391		546.29321903	0.0	0.127338356204	0.0		0.14145531789661867	47.064333711395996	0.0	555.6085124533	0.13407565449137068	0.0
17875355	0.0338903142719	0.0033124195179000003		0.0425882509444	0.0	0.015681544029000002	0.0		0.0149203773400983	0.014379979145800003	0.0	1.4928020940543998	0.017138090543697526	0.0
17875245	0.017883748827400004	0.0		0.0207262673648	0.0	0.0	0.0		0.0191210939517448	0.03832942585	0.0	0.277089383336583	0.035549525101769286	0.0
17875225	0.0764318436015	0.0615163624752		0.778588874236	0.0	0.045904492548699986	0.0		0.0619799022331543	0.14570981590070994	0.0	1.8671911817797	0.030540652084193376	0.0
17875525	0.00421657289368	0.333861756977		4.66517208666	0.0	0.0122380296772	0.0		0.003583368567389803	7.0703380378192975	0.0	23.7605708097	0.0298464002329395	0.0
17883624	0.014130928827799996	3.59427758667e-05		0.0135145183881	0.0	0.00871459694989	0.0		0.7649289946441353	2.048410505504584	0.0	219.23229689041838	0.05993295212734614	0.0
17881678	0.601828275929	2.92292108421		10.5249374828	0.0	0.475949367089	0.0		0.5911525385409397	28.42995392176293	0.0	154.95811695220223	0.2357890778993037	0.0
17875305	0.251351972989	0.0		0.000473202788271	0.0	0.113821138211	0.0		0.02470869725343764	0.01514248922468	0.0	0.6847244346278709	0.007286505392010008	0.0
17880680	0.00354550779735	0.00469985097516		0.0412595673261	0.0	0.113790970934	0.0		0.002235641309724273	0.012922080757559998	0.0	0.7931592018650999	0.013076319138002435	0.0
17880392	0.0620025517941	0.0		0.0	0.0	0.632653061224	0.0		0.006837701396517904	0.0968364146828764	0.0	0.4066813459208764	0.10501901140675622	0.0
17875359	0.0035924905406399996	0.0175883085562		1.11107744595	0.0	0.045382346267300006	0.0		0.0024124808498353825	0.0186555592124058	0.0	3.682864379966	0.035559714586489516	0.0
17884304	0.57719515492	0.34431057430600004		8.68711114862	0.0	0.0727215417867	0.0		0.57719515492	0.667840779248302	0.0	21.763572542204827	0.09989226612057596	0.0
17877639	0.0182702929423	0.0028577402554200004		0.14811458640900002	0.0	0.012430752601	0.0		0.02912694004685162	0.011430961021680001	0.0	0.2170837079393	0.02750268801990824	0.0
17877605	0.0502714296124	0.00289259074634		0.07430124664099999	0.0	0.04323883336730002	0.0		0.0227147632115901	1.6855411905061242	1.4412545854820749	3.4050144629469	0.034127914549938645	0.010520996074315371
17877583	0.0032209199012600003	0.00167282356415		2.74484009296	0.0	0.0145610013012	0.0		0.004722497386465707	0.01111730660341	0.0	2.979036227403	0.022296366910274253	0.0
17877889	0.021106902089499998	1.97419194592e-05		0.0217950790829	0.0	0.000881661442006	0.0		0.021106902089499998	0.0007765154987281999	0.0	0.040924999038900005	0.010903143739752921	0.0
17877699	0.00018732887804900002	0.00299090167391		0.06347357996860001	0.0	0.0514657980456	0.0		0.010685427690487396	0.02205789984511	0.0	0.33747340553960004	0.06563957903875056	0.0
17875469	0.016071458982200002	0.000531983404017		1.18485721211	0.0	0.0577882847386	0.0		0.014199671281026132	3.073069788944017	0.0	23.83355421001	0.0438081827426889	0.0
17875369	0.0670293963578	0.000797975106025		1.8413147020400005	0.0	0.0291023498181	0.0		0.047852112509794514	0.017054764721734	0.0	7.391412719193294	0.03794403836304753	0.0
17883002	0.6368528776619999	0.00913236569613		0.23690954476	0.0	0.278056951424	0.0		0.3969162777282615	0.026317445287527	0.0	0.5241965548941651	0.5217777777777028	0.0
17876221	0.010888682193	6.7174917316		14.5144115321	0.0	0.0385277995301	0.0		0.0075133859161345875	10.020426355352301	0.0	64.18101119274	0.06640517478668406	0.0
17883008	0.0110495021105	8.22761394375e-05		0.158802628575	0.0	0.0622837370242	0.0		0.0999402933578303	0.4248805852528738	0.0	4.730972962825232	0.11126578502576287	0.0
17881630	1.0	2.18372360905e-05		5.24093666172e-05	0.0	0.384615384615	0.0		0.939534964236861	2.9229429214460905	0.0	10.524989892166618	0.4758064516132944	0.0
17875237	0.0	0.00189281115308		0.0165620975895	0.0	0.045901639344300006	0.0		0.0063041799052248795	0.014196083648120004	0.0	0.5355311240425	0.06390801524162665	0.0
17881688	0.6730995944570001	0.000375600460757		0.000497888982864	0.0	0.84756097561	0.0		0.6045392805071264	25.507032837552927	0.0	144.43317946940226	0.2238772056755489	0.0
17875709	0.0104348520662	0.0		0.0	0.0	0.0265402843602	0.0		0.01645807966178756	0.0	0.0	0.17191334482050002	0.00911776036985758	0.0
17881912	0.0048424984893999995	0.581503960013		4.43703803219	0.0	0.056253928346999986	0.0		0.0012169349386566732	0.7153133990576299	0.0	30.95008251839	0.019084396686827737	0.0
17883598	0.693991531667	0.0		8.98569396668e-06	0.0	0.0	0.0		0.555691073201538	0.0021479171055039	0.0	0.7716331581488407	0.1036937283569692	0.0
17877591	0.017029168465	0.0		0.0	0.0	0.0017075581917899998	0.0		0.017029168465	0.0	0.0	0.0515312389325	0.003910581917939894	0.0
17877733	0.0902002238445	0.0		0.042454187649099986	0.0	0.0914473684211	0.0		0.03071796819334696	0.0029493613728800005	0.0	0.30012867491713	0.022684497275891717	0.0
17877879	0.0034778446922099997	0.0		0.0158569733685	0.0	0.0027296686747	0.0		0.00347784469221	0.0	0.0	0.0158569733685	0.01231241580252028	0.0
17883618	0.14443731877	0.322794290584		13.0752181097	0.0	0.113646348965	0.0		0.14277853345279098	2.371092474914	0.0	232.2930030697	0.06926092854771948	0.0
17876275	0.0081385113217	0.0		0.590375353277	0.0	0.0287244401168	0.0		0.014385785588261903	0.00167282356415	0.0	3.3372942082821297	0.017219701525172142	0.0
17875691	0.00160254051853	0.0		0.0363498365914	0.0	0.0233488992662	0.0		0.02764727890270435	0.0	0.0	0.2082631814119	0.009476369821419485	0.0
24611989	0.933838982607	0.000144838993947		0.0005630000569	0.0	0.202898550725	0.0		0.933838982607	2.9230877604400374	0.0	10.525552892223518	0.4713473833771371	0.0
943010079	0.0037464062756699997	0.0082222297824		0.751899634539	0.0	0.00846545866365	0.0		0.0037376114943005476	0.0120893500898009	0.0	11.4974584630814	0.008482745324859235	0.0
17877731	0.00726318617534	0.00191085384722		0.252938892951	0.0	0.006314786131300001	0.0		0.008603719820005995	0.0037801673934131	0.0	0.7631860056416	0.005107289829512185	0.0
17880458	0.312068573326	0.000250871540629		0.000334495387506	0.0	0.0901639344262	0.0		0.08148910955553265	0.000662018166622	0.0	0.7009818298155059	0.11003919204120036	0.0
17876477	0.208038525594	0.105314595508		822.2007619110001	0.0	0.0578118524658	0.0		0.1667976534802442	3.1543775745980005	0.0	845.6740251955002	0.1550765270950181	0.0
17877739	0.0337262847112	0.0		0.0	0.0	0.017093214369600002	0.0		0.02365831808437116	0.0006054188634149999	0.0	0.024658073718490003	0.029835280666037238	0.0
17880932	0.70314941793	0.151259025346		0.332954188987	0.0	0.447389558233	0.0		0.8095395217444832	0.15897957780361	0.0	0.3441232548757	0.4629308207290218	0.0
17877651	0.00174750506816	0.000955426923611		0.018236192150700003	0.0	0.0147783251232	0.0		0.021781466833080517	0.002741659867756	0.000207701505133	0.06226782719027999	0.01451938981806098	0.0020034591972157485
17883594	0.00878202019507	0.0		0.30484534344	0.0	0.0	0.0		0.02959210815784385	0.32370846991108304	0.0	13.382796849327967	0.11647159577544786	0.0
17877677	0.0195972434742	0.0		0.139907733857	0.0	0.0	0.0		0.0195972434742	0.5677680237748001	0.6885988271131329	1.09784056145115	0.027526239967059368	0.030359598033047545
17875343	0.040372245749199995	0.00189281115308		1.24830895546	0.0	0.0006185248183080001	0.0		0.05132127003647944	0.01324967807158	0.0	2.030039961684	0.002842287694975746	0.0
17881862	0.000999492551034	0.0		0.495140985004	0.0	0.0	0.0		0.000999492551034	0.0059180225798668	0.0	2.716293256692	0.0027726432532360038	0.0
17881086	0.615064719848	0.6139151813329999		8.19934965055	0.0	0.360909090909	0.0		0.14814611543929007	14.570063345570448	0.0	271.8333629091078	0.14486331262249674	0.0
17877727	0.054960641684800006	0.0		0.000263225592789	0.0	0.06818181818180001	0.0		0.006202042386711436	0.000996967224637	0.0	0.16002722334088898	0.04328695445354274	0.0
17876501	0.346637274435	0.151993965614		222.79970149599998	0.0	0.167214268951	0.0		0.4009520315186725	3.3063715402120004	0.0	1110.5947735973002	0.15462307759064292	0.0
17883004	1.0	0.00036686556632		0.000410540038501	0.0	0.606965174129	0.0		0.445421343156233	1.067509402975378	0.0	12.492686877107566	0.3321393034821626	0.0
17882998	0.430505652641	0.000458581957901		0.173639445044	0.0	0.348965517241	0.0		0.3808032827621217	0.0264047942318891	0.0	0.7244932473338009	0.4498977505111073	0.0
17877615	0.0336425674109	1.68038331785	1.4404181737	3.2471834649	0.0	0.066935949221	0.0	0.05468103023695815	0.009218664788787715	3.1127289445	2.830139261804	5.098647420287	0.0557712870729761	0.051686920403122616
17883592	0.011794653794400001	0.0007359143583019999		0.0012432838848299998	0.0	0.591911764706	0.0		0.026485233594853275	0.323530204942302	0.0	13.07646139358483	0.11742655391898693	0.0
17875555	0.039530925678400004	0.00016747625681999998		0.0343326326481	0.0	0.004427255610399999	0.0		0.06140421617672814	0.0010217672033836	0.0	0.07508903729553999	0.01511176144103668	0.0
17877629	0.00240863096738	0.0012462090308	0.000207701505133	0.03488716305219998	0.0	0.0137393241738	0.0	0.004047835682157774	0.013319565620781244	1.4335918356808002	1.389928789609133	1.8863511184392	0.04869453788241565	0.0445599596740076
17883038	0.013768976781799998	0.00272370794846		0.290689601117	0.0	0.0566885585897	0.0		0.004794254071478885	0.14368873205696	0.0	2.5200881867469995	0.06162533758899806	0.0
17876197	0.06067814173650001	6.56769634588e-06		0.024891569150900003	0.0	0.000225580870742	0.0		0.10347789993523274	0.00327446628625532	0.0	1.9682470651825592	0.01158301158300442	0.0
120299689	0.250971962288	0.434325584212		9.4139842401	0.0	0.13897694524499998	0.0		0.3482176140859558	0.597079251914	0.0	27.4809838939	0.06329730552597165	0.0
17875635	0.107756876832	0.000427645136369		0.12660355587400002	0.0	0.0161424993042	0.0		0.056784943677281034	0.0019244031136589998	0.0	0.3329516423014001	0.020660754312452918	0.0
943010064	0.999744984534	0.0		0.0	0.0	0.42091152815	0.0		0.4007479028310216	0.041800645255517	0.0	0.08102407314532399	0.4123690970165936	0.0
17877745	0.0862883919601	4.60644787381e-05		0.00276386872429	0.0	0.0564915758176	0.0		0.08363223349416446	0.0006646446217925999	0.0	0.011950441912629998	0.054748289115946966	0.0
943010036	0.8193954353540001	4.5826961923e-05		0.0039869456873	0.0	0.0114942528736	0.0		0.9516120513527742	24.457076768561024	0.0	132.6316804516533	0.20406128696970696	0.0
17875575	0.0519231754818	5.582541894e-05		0.009684068262	0.0	0.0194253338729	0.0		0.04183005074110432	0.0008542909465636	0.0	0.04075640464744	0.02561665082302705	0.0
17877609	0.000286882494842	0.0013243186549500002		0.0532467110206	0.0	0.0235556657575	0.0		0.027712378747906767	2.249170414503784	2.129645711090076	4.2475693759949	0.03812482349616909	0.03486339544400355
17875655	0.00747634605985	0.0		0.0472547875688	0.0	0.00497017892644	0.0		0.00911930860780602	0.2840152476855	0.0	10.364023281815498	0.059619238476947924	0.0
17877721	0.599944231575	0.0		0.0	0.0	0.631578947368	0.0		0.010873305986950558	0.000996967224637	0.0	0.15976399774810002	0.04302367503903888	0.0
17882966	0.167986433239	0.0326537606306		1.10732170436	0.0	0.0146019783325	0.0		0.04135957365611953	0.1310294976538	0.0	3.2375465991772003	0.02227917981069968	0.0
17876179	0.10879983009000002	0.0		0.443864215398	0.0	0.0	0.0		0.10879983009000002	0.01324967807159	0.0	1.1607664396286	0.00354388159266089	0.0
17884284	0.810952138554	0.00106031188807		0.754978028326	0.0	0.0584431137725	0.0		0.5558664114039537	0.0032306932284906	0.0	1.526813364589091	0.0839516641933157	0.0
17880612	0.300417967652	2.00942909767		26.655853186599998	0.0	0.100150764592	0.0		0.25723901174441743	2.172182765372	0.0	44.7228528404	0.07340010704192214	0.0
17877719	0.0032531118645599995	8.30806020531e-05		0.0415549326826	0.0	0.000966183574879	0.0		0.015260044653215354	0.0018693135461931	0.0	0.5102471126906	0.004568878499707949	0.0
17877669	0.023973482678400004	0.007643415388880002		0.526274073705	0.0	0.0144211928835	0.0		0.01691452314865938	0.009969672246370001	0.000373862709239	0.796992215495	0.018138936535199518	0.003045916672867456
17875453	0.08878928149620001	0.00129712002831		3.6760939283800007	0.0	0.042171269924800005	0.0		0.08195771083386355	3.075489985047471	0.0	27.015363043694897	0.04982852943574479	0.0
17877887	0.016939425952	0.0		0.0144050205654	0.0	0.00017905102954299994	0.0		0.016939425952	5.264511855783001e-05	0.0	0.018320501258143003	0.017515764187756643	0.0
943010074	0.498760700457	0.206592554776		3.3276806238	0.0	0.182866556837	0.0		0.3718688306553433	5.026561384193	0.0	32.417550088785895	0.2907993499958477	0.0
943010068	0.987627607484	0.040228364257		0.0792334197859	0.0	0.315248796148	0.0		0.4641353964007239	25.548457882347694	0.0	144.51370565356473	0.2279353718223842	0.0
17877713	0.00476399733417	0.00178623294414		0.468692180008	0.0	0.00528057004708	0.0		0.011557940401689316	0.00386324799547	0.0	0.724746595536	0.009073563705753048	0.0
17877875	0.00773358117453	0.00606398542004		0.034327733556	0.0	0.043342814574	0.0		0.01461242458968699	0.011500662003522	0.000836411782075	0.19285574142129605	0.03561084468921818	0.003170654210359893
17875687	0.015645694379	0.0		0.120382105888	0.0	0.0129140932061	0.0		0.03839247399441858	0.00167282356415	0.0	3.45767631417013	0.016837700508121854	0.0
17881814	0.0162226827033	0.0		0.0493484943872	0.0	0.0	0.0		0.13312922928794846	1.5956272078132	0.0	7.566600988577199	0.15677667163131898	0.0
17875301	0.0460866594539	0.00473202788271		0.357741307933	0.0	0.00547445255474	0.0		0.05395860950369848	0.07145362102898001	0.0	1.115338971955	0.03457486273928494	0.0
17876267	0.0305514722738	8.38340552098		80.5627000985	0.0	0.17013783472	0.0		0.02312705446208918	9.06802621077573	0.0	91.936708071793	0.18593339176175552	0.0
17884300	0.301846668054	0.000826683844934		0.0671233419043	0.0	0.0766666666667	0.0		0.301846668054	2.0595951257162177	0.0	223.6584415926227	0.06617363879549437	0.0
17883600	0.564599915701	0.000386384840567		0.0853688974903	0.0	0.450261780105	0.0		0.5458935995045956	0.0039177966023104215	0.0	1.7119562686718417	0.0966428287644237	0.0
943010067	0.7869226044230001	0.0		0.0	0.0	0.193220338983	0.0		0.4085188125833841	1.106222263047698	0.0	12.570002987564724	0.31834979099740296	0.0
17881692	0.101162261615	3.58614544138		34.304142571599996	0.0	0.0619321695286	0.0		0.101162261615	4.010949648234157	0.0	39.03325998862111	0.07821010404108983	0.0
17883604	0.281952252339	1.79713879334e-05		0.00971892332336	0.0	0.08928571428570001	0.0		0.5482965908730525	0.003248664616424	0.0	1.5365322879124506	0.08398314014749628	0.0
17877737	0.13209479907	0.0006054188634149999		0.00750192939449	0.0	0.0766961651917	0.0		0.09085106829435363	0.001602386088052	0.0	0.16726592714258998	0.05468258956628413	0.0
17880480	0.0207428372409	0.0		0.0	0.0	0.005405405405409999	0.0		0.011993439900959557	0.544615364517	0.0	0.569230748224	0.0992569002125505	0.0
17881842	0.008934061548690002	0.0		0.0243875410524	0.0	0.0	0.0		0.008934061548690002	0.0059180225798668	0.0	2.0652198122314003	0.004038228563738533	0.0
17881704	0.08474147771889999	0.599587696515		24.081010419699997	0.0	0.0848603763008	0.0		0.10585569428494772	1.0243860056284362	0.0	28.653180753950227	0.09196272416417124	0.0
17876215	0.0824174383876	1.97030890376e-05		0.0147313429038	0.0	0.000801603206413	0.0		0.0824174383876	0.0006797565717993001	0.0	0.034171724087590005	0.012596259625959538	0.0
17884278	0.134762893964	2.24642349167e-05		0.00020217811425	0.0	0.147540983607	0.0		0.5556891646086414	0.0021703813404206	0.0	0.7718353362630908	0.1042023198325828	0.0
17876247	0.0281611933966	0.00141960836481		0.541343989782	0.0	0.007236544549979998	0.0		0.025583176641388428	0.14716606715226002	0.0	2.0901367157932	0.045546500202315696	0.0
17876181	0.0244859656989	0.00567843345925		2.16395635076	0.0	0.00139567341242	0.0		0.023636503096344692	0.006624839035792	0.0	2.4970911137033	0.004572452154239253	0.0
17876193	0.00210801757184	0.0212941254722		0.250167698221	0.0	0.0224412751678	0.0		0.017090189637478582	0.039680409134425006	0.0	3.2025598462110003	0.031169233950168337	0.0
17875385	0.0806468517891	0.000256140157489		0.898146263685	0.0	0.0673508659397	0.0		0.0746127016976836	0.01623051883032544	0.0	5.721905548090212	0.0434782608695686	0.0
17875549	0.0291306735673	0.0189845492423		4.58098719094	0.0	0.103067484663	0.0		0.012953574272174235	7.5522904218923	0.0	81.89630223664001	0.06845268939788028	0.0
17883626	0.848648085598	0.0103579363667		4.3590213603	0.0	0.11381811419	0.0		0.7937575300473224	2.058768441871284	0.0	223.59131825071842	0.06604091785860561	0.0
17875235	0.0202346167464	0.0		0.03691179770980002	0.0	0.0	0.0		0.0202346167464	0.03832942585	0.0	0.314001181046383	0.02571652925010205	0.0
943010063	0.84239284134	0.0		0.0	0.0	0.6764705882350001	0.0		0.3928688637410187	0.04142504479476	0.0	0.08052618416245999	0.3863778379506103	0.0
17883612	0.063900593922	0.000457601978269		0.51887105663	0.0	0.0459508644222	0.0		0.5661768145673061	2.050383201577737	0.0	219.9210187730389	0.06160306588388768	0.0
17877873	0.0159362047444	3.89643224788	3.5496305146300005	4.20363830749	0.0	0.0648295189164	0.0	0.06491631084571411	0.012668048579911035	14.79854148988	5.731640602240001	37.504311885090004	0.1038942581011437	0.09607659764085004
17875517	0.00872575189034	0.0245677231578		0.348008662681	0.0	0.0424528301887	0.0		0.005955137409894694	7.0759212117348005	0.0	19.527592281441	0.02628903413213961	0.0
17877661	0.0	0.00207701505133		0.256054415528	0.0	0.0166518367866	0.0		0.0	0.004984836123192	0.000373862709239	0.5776594260755	0.020657043305152376	0.0035356285122582908
17875563	0.04487366870659999	3.28395007451		45.0856124697	0.0	0.0866066557556	0.0		0.02508196029213197	7.795185377337201	0.0	85.50757416386998	0.07253376263303403	0.0
17875689	0.018832785733499998	0.0012829354091099998		1.41229806286	0.0	0.0008550140466589999	0.0		0.018832785733499998	0.0029557589732600005	0.0	4.86997437703013	0.012207635964758335	0.0
943010073	0.400548348746	4.77974046516		29.0106360452	0.0	0.304800431499	0.0		0.39001992867544216	4.82116550995476	0.0	29.09116222936245	0.32033580499413383	0.0
17877633	0.0	0.000540023913345		0.009144471987379998	0.0	0.016014234875399998	0.0		0.003212360155678589	0.568308047688145	0.6885988271131329	0.96088779472858	0.03784560635092496	0.04038250392624637
17875699	0.0753253023694	0.235657534737	0.0	60.461017513	0.0	0.147282819156	0.0	0.007833296957007727	0.04490201930360229	8.619063055717	0.0	141.0237176115	0.1628262305915598	0.0025059692569350373
17877625	0.0387646243014	0.566521814744	0.688391125608	0.916856159689	0.0	0.0461324687355	0.0	0.053651535514429013	0.03805608945216337	5.32877787453	4.939351602734	6.055102262877001	0.05867394637447295	0.0567888923692385
17882962	0.006740758538430001	0.0648290377867		1.2195763791299998	0.0	0.07317676143389999	0.0		0.012826271450385706	0.09748279841730001	0.0	2.32689808349	0.05301556420233836	0.0
17876199	0.0400890033341	0.000108366989707		0.005947049041199999	0.0	0.008693852204510001	0.0		0.04266976401962209	0.001001573692747	0.0	0.03419799487301	0.020272616773776776	0.0
17881686	0.790849982262	4.3674472181e-05		4.80419193991e-05	0.0	0.933333333333	0.0		0.21722438125392896	25.50665723709218	0.0	144.4326815804194	0.22265159276484486	0.0
943010078	0.59619586361	1.06437794332		12.4889308725	0.0	0.302567906467	0.0		0.452042214896938	25.50661356262	0.0	144.4326335385	0.2225877192980841	0.0
17875365	0.023632490663900003	6.89608116318e-05		0.00843620595629	0.0	0.0102614562834	0.0		0.04435660486546776	0.0111365204395318	0.0	1.4586500490662897	0.014687756778954697	0.0
17883028	0.0169710647102	0.0761359863218		1.0098222065	0.0	0.0554819163037	0.0		0.009507023363020565	0.17361878473910006	0.0	3.33672028999	0.05415320115292712	0.0
17884276	0.249565833919	0.000225344796036		0.0634727197958	0.0	0.211087420043	0.0		0.08811206908127422	0.0023957261364566	0.0	0.8353080560588908	0.11295391061447622	0.0
24611991	0.406845336116	0.0073409790893500014		0.03522409708969998	0.0	0.2159292035400001	0.0		0.406845336116	7.979582790219352	0.0	11.6705155285797	0.31868868952770085	0.0
17877695	0.0051903283244	0.0190669981712		0.273999825571	0.0	0.06847175214790001	0.0		0.008141228478199343	0.026710413560080002	0.0	0.800273899276	0.03473411281252113	0.0
17877585	0.156273444155	10.902109242	2.18201008761	33.3006735776	0.0	0.228096228096	0.0	0.19514724514365087	0.14264294786011658	19.780413999897398	2.18201008761	174.68775533760655	0.1869808027924634	0.025052192876949785
17875625	0.048267609719	0.0007196531714730001		0.0264650973988	0.0	0.0236042521135	0.0		0.041814651482869065	0.002644056285132	0.0	0.35941673970020005	0.022244236311242067	0.0
17877599	0.232262245449	0.000278803927358		0.000697009818396	0.0	0.385964912281	0.0		0.007322836193685	0.005436676583481999	0.000836411782075	0.15852800786529594	0.03143734464101345	0.004882084246555761
17881852	0.0082779207877	0.0		0.180320000509	0.0	0.0	0.0		0.002197744552765517	0.0059180225798668	0.0	2.221152271688	0.0037745344740832357	0.0
17875419	0.23830787402800002	0.0		0.8744120950700002	0.0	0.0394736842105	0.0		0.07607936495040983	0.0013233908136935002	0.0	4.55409440388121	0.0410760521349428	0.0
17881876	0.0561172344913	0.650854765219		58.206423961000006	0.0	0.035548848961300006	0.0		0.04485090272649901	0.7492305022421999	0.0	62.006160686452006	0.029852221618174395	0.0
17877763	0.0210515776425	0.0007567735792689999		0.019129919956	0.0	0.019569637411	0.0		0.02584680948449538	0.0017537408039060005	0.0	0.17915714329688898	0.029436501261528962	0.0
17876209	0.00155820417031	0.037008623669		0.62685272914	0.0	0.023100699528200003	0.0		0.0023995642551932787	0.0918509211152	0.0	3.35016580533	0.02411000188357277	0.0
17875349	0.0	0.00425882509444		0.0274457617197	0.0	0.00853889943074	0.0		0.04619081250125242	0.018638804240240003	0.0	1.5202478557740997	0.016501650164998192	0.0
17875463	0.369722339523	2.62707853835e-05		8.53800524965e-05	0.0	0.173076923077	0.0		0.054743507086636216	0.0006140796083405	0.0	0.015943082879606496	0.02233602091958662	0.0
17880686	0.0	0.0		0.211833911178	0.0	0.0	0.0		0.0	1.28408040282	0.0	8.603453101758	0.1468948655253081	0.0
17877749	0.00918601426836	0.0		0.000177677275133	0.0	0.0	0.0		0.009517263355957373	5.922575837760001e-05	0.0	0.0046261897932729995	0.03863065326632919	0.0
17880924	0.0928924512771	0.000453598706372		0.0020411941786700003	0.0	0.206896551724	0.0		0.002008333506494954	0.013375679463932	0.0	0.79520039604377	0.013531763180649956	0.0
17880688	0.22138883366599998	0.360561277835		2.0961127112	0.0	0.190375766871	0.0		0.2924364015506374	0.96014897435	0.0	26.1771231309	0.1011642029801306	0.0
17875455	0.058389943575	7.88123561506e-05		0.0403647771629	0.0	0.0808597748209	0.0		0.08743112559950106	3.074192865019161	0.0	23.3392691153149	0.055521941844298976	0.0
17875375	0.0173007884138	1.31353926918e-05		0.531221833529	0.0	0.00573065902579	0.0		0.046456143393598895	0.016256789615709	0.0	5.550098017153294	0.0458967102935977	0.0
17884290	0.2572145507	1.79713879334e-05		0.000597548648784	0.0	0.0300751879699	0.0		0.5549148931478746	0.0021613956464539	0.0	0.7050893588430749	0.10803268885778862	0.0
17875551	0.00491957397924	0.0012829354091099998		0.104345413274	0.0	0.00692041522491	0.0		0.019780166298133336	0.01368464436382	0.0	0.62761866874671	0.014352574102988225	0.0
17876185	0.00511582264404	0.0113568669185		0.781731006224	0.0	0.00464940939935	0.0		0.020921943144634084	0.029995671158740005	0.0	2.3019788619981	0.012252804180357964	0.0
17875703	0.0694022354875	0.0		0.0284384015686	0.0	0.00609169605643	0.0		0.027250369186681167	0.0	0.0	0.7622886980975001	0.011609378556792305	0.0
943010065	0.987016127225	0.0		0.0	0.0	0.333333333333	0.0		0.3917883154545211	0.04142504479476	0.0	0.08052618416245999	0.3863447127395668	0.0
17877741	0.0346304925046	1.31612796395e-05		0.0016846437938499998	0.0	0.0231982678627	0.0		0.0248811087652272	0.0006185801430544999	0.0	0.026342717512340002	0.05501259445842432	0.0
17875473	0.00168429473852	0.0102898745608		4.04986340752	0.0	0.00776166573713	0.0		0.02485731282963221	0.10214079567599996	0.0	7.400029212850001	0.014715701199149441	0.0
17877729	0.00405742379141	0.00103850752566		0.00473559431703	0.0	0.203296703297	0.0		0.042450597235724835	0.0030324419749331	0.0	0.2992294199506301	0.007962328767127928	0.0
17881810	0.011146881039	0.0286604442517		0.08900527079819999	0.0	0.0458811261731	0.0		0.012404513363044876	0.0388912753551	0.0	0.3729056110022	0.03988432341247843	0.0
17881638	0.0185490293705	0.000693139656505		1.1684100213600002	0.0	0.009012699713229998	0.0		0.002860492216312383	0.0038671203074009	0.0	11.89424587604	0.008761958889854147	0.0
17875299	0.0032074079960199998	0.00615163624752		0.134844864602	0.0	0.107142857143	0.0		0.003526408360529057	0.06388237641661	0.0	1.1210551087563	0.0305164319248776	0.0
17883610	0.366785169392	0.0		0.00022913519615	0.0	0.0	0.0		0.554848955755433	0.0021434242585205	0.0	0.7044918101942909	0.11015561015551367	0.0
17876249	0.0108185567395	0.00425882509444		0.055837929016	0.0	0.110726643599	0.0		0.030887401282262937	0.13155037513936	0.0	1.292635841033	0.06018151378974641	0.0
17875273	0.0113622763779	0.0151424892247		0.0359754459059	0.0	0.0934210526316	0.0		0.015195191971148441	0.07098041824072	0.0	0.9017552910659	0.04317939781197983	0.0
943010031	0.529390431017	2.04452799344		6.66245619044	0.0	0.281719532554	0.0		0.3178565147884597	2.1504883863069386	0.0	7.2420342682540015	0.2139104853961762	0.0
17876239	0.00927906313354	0.0		0.726197976692	0.0	0.0030929827952800005	0.0		0.00927906313354	0.08192463830350001	0.0	8.813972608087498	0.010823846110704343	0.0
17877671	0.00648624274454	8.30806020531e-05		0.164748833871	0.0	0.000390625	0.0		0.00648624274454	0.0028247404698091	0.000207701505133	0.22701666106128	0.007669728245437913	0.001032177018468979
17876207	0.0368398957508	7.22446598047e-05		0.00358267835668	0.0	0.0172084130019	0.0		0.07451914322555679	0.0006600534827617	0.0	0.01944038118379	0.020850864890130254	0.0
17875491	0.026516388215799998	3.07253780554		22.6486969979	0.0	0.0413621949538	0.0		0.02496104731020995	3.4382372529930803	0.0	30.35624487870271	0.032994415007872216	0.0
17880576	0.616318949784	0.316982390963		1.11594377275	0.0	0.224409448819	0.0		0.13854654784372006	0.9726728212334479	0.0	9.375655589857747	0.4543496985359187	0.0
943010077	0.545867818169	24.4422356193		131.943702666	0.0	0.206248872533	0.0		0.5544263435324664	24.445559735703288	0.0	133.5969467586519	0.1986403559107124	0.0
17883606	0.497797243162	1.79713879334e-05		0.000372906299617	0.0	0.059523809523800014	0.0		0.5484222593486993	0.0029174867509044198	0.0	1.5106136364984215	0.08151637997150903	0.0
17880432	0.0	0.000247194133408		0.00705289681719	0.0	0.0106335844041	0.0		0.00011316478749520415	0.010166000698517998	0.0	0.3984442727231901	0.05508310784693833	0.0
17880274	0.0	0.0		0.0305543013383	0.0	0.0	0.0		0.0	0.00140172810643	0.0	0.2563803550653	0.007145142369624742	0.0
17876255	0.0168832024499	7.88123561506e-05		0.00460723898664	0.0	0.043253712072300006	0.0		0.035626379525327226	0.0007984655276236001	0.0	0.03107233638544	0.027650382186771016	0.0
17875241	0.0242693596434	0.00946405576542		1.39263580588	0.0	0.0053013714417400005	0.0		0.02735777915916798	0.15663012291768005	0.0	3.4827725216732004	0.03210408807453391	0.0
17876165	0.00497713101334	0.00473202788271		0.0335973979672	0.0	0.0467675378267	0.0		0.030352934843648524	0.10978304687887	0.0	0.8124712574062001	0.08487194758784912	0.0
17875275	0.0	0.0312313840259		0.287707295269	0.0	0.0986496624156	0.0		0.01838896722049637	0.06861440429934	0.0	0.9019245144454999	0.08985930448629884	0.0
17877735	0.0394685881311	0.000996967224637		0.100153665775	0.0	0.01904340124	0.0		0.021549219730741486	0.003946328597517	0.0	0.40028234069213003	0.021559099308737725	0.0
17875411	0.000279700653269	3.28384817294e-06		0.000988438300055	0.0	0.00238095238095	0.0		0.01014577672414773	0.00329745322346588	0.0	1.947817380076871	0.02557898375387085	0.0
17881820	0.026005187678799998	0.0		1.16020341354	0.0	0.0	0.0		0.05177178309491269	1.5956272078132	0.0	8.67745590773	0.13467106592153633	0.0
17875477	0.0133015245986	0.000456454896039		0.014123830991799997	0.0	0.0177716158306	0.0		0.017932792212231072	3.073526243840056	0.0	23.847678041001807	0.03764179104476313	0.0
17875383	0.133737989344	0.000256140157489		0.199250398447	0.0	0.059275521405	0.0		0.05575708638819656	0.01624693807119014	0.0	5.0197496872382965	0.04530687505487786	0.0
17875543	0.0	0.0027796933864000003		0.20612495573	0.0	0.009080590238370002	0.0		0.0016223927881327807	0.036969432112510005	0.0	0.8712819181537099	0.019089344390576614	0.0
17884288	0.6051156963800001	4.49284698334e-06		0.000840162385884	0.0	0.00505050505051	0.0		0.5485021570008188	0.00289951536297102	0.0	1.5102407301988048	0.08172066791993404	0.0
17875449	0.025834227753499996	0.000124786230572		0.01143107549	0.0	0.005927835051550001	0.0		0.037155775959537216	0.00068960811631782	0.0	0.026707537190529	0.014861633071410512	0.0
17880682	0.00139479734929	0.0		2.77720942608	0.0	0.0	0.0		0.16901114608169238	0.0082222297824	0.0	4.2045942510720025	0.005550296077669209	0.0
17875253	0.0346458547618	0.0421150481561		0.8711663332070001	0.0	0.0347826086957	0.0		0.02860576008899695	0.14574645878745002	0.0	1.5487927260112002	0.05870020964362545	0.0
17882972	0.000961592710178	0.00834296748508		0.159670989324	0.0	0.0577540106952	0.0		0.0008230402636547327	0.010790720865770001	0.0	10.961632653024001	0.023419773095626543	0.0
17877391	0.164983155305	10.9273675597		969.97887419	0.0	0.15618905066400002	0.0		0.14644757858862273	11.996998350202	0.0	981.7638634270816	0.17995647217280222	0.0
17884286	0.445605886985	8.98569396668e-06		0.0518557306114	0.0	0.154411764706	0.0		0.5484026498280407	0.00300015313860268	0.0	1.510566146454951	0.08362637362637029	0.0
17880342	0.00301533884372	0.0		0.0	0.0	0.0	0.0		0.0037918019268093866	0.0	0.0	0.0	0.0022276516240278587	0.0
17875535	0.0273687877141	0.0		0.00978258370719	0.0	0.0	0.0		0.0273687877141	0.1133958345822	0.0	6.817021223427187	0.014667601121338959	0.0
17875533	0.128987532893	0.0204998020422		1.2232567016	0.0	0.0151615029664	0.0		0.09195688300535014	0.1133958345822	0.0	6.80723863972	0.017760804994839487	0.0
17877647	0.00674680016804	4.15403010265e-05		0.14406176396	0.0	0.0006832156684129999	0.0	7.066266478854128e-05	0.00674680016804	4.7622976000870265	4.250960477126	5.282307867148	0.05281014898952944	0.04620808008696623
17875239	0.0232432225489	0.0		0.155394050817	0.0	0.00176961321311	0.0		0.0232432225489	0.0	0.0	0.155394050817	0.013997347870899669	0.0
17876265	0.0058981259744	0.0		0.0	0.0	0.0	0.0		0.02744675785666412	0.0	0.0	0.7338502965289	0.014495284666428918	0.0
17876481	0.45113230836999996	0.0		42.1210469058	0.0	0.134782608696	0.0		0.41739442444649855	3.1543775745980005	0.0	887.7950721013001	0.15313630128474495	0.0
17877759	0.0186629675876	0.0		0.0299221692603	0.0	0.0	0.0		0.0186629675876	0.0006185801430544999	0.0	0.03910874244864	0.032496655913127004	0.0
24612160	0.0040188092976	0.0		0.0591503485339	0.0	0.0	0.0		0.0040188092976	0.0378562230617	0.0	1.1454877039359	0.016147097255912242	0.0
17865888	0.0	0.949131366331	0.335445359349	89.54843424059997	0.0	0.27239150507800003	0.0	0.11915473072277928	0.0	65.319133396881	65.07273227550901	882.2041944035999	0.14016399724113826	0.12876067975511513
17875577	0.055548725512800004	2.0592207370200004		98.0839753326	0.0	0.239329268293	0.0		0.035463834198341974	25.410597475238	0.0	207.13407237459998	0.23141018879869954	0.0
17875279	0.0	0.0		0.00754348246846	0.0	0.0	0.0		0.0	0.05583792901602	0.0	0.8733233276284599	0.033566058002141394	0.0
17875637	0.010891571067899999	0.0		0.5285693885530001	0.0	0.0	0.0		0.010891571067899999	0.00513174163643	0.0	2.366958210988	0.00899629564296118	0.0
17876497	0.304431134018	0.0		0.0	0.0	0.220276872964	0.0		0.12441489524632428	3.2246112008892007	0.0	845.7511954762398	0.16376519293059075	0.0
17875713	0.0006407903689789999	0.0		0.0	0.0	0.0051101884382000005	0.0		0.0006407903689789999	0.054970444500199986	0.0	0.8798006790459999	0.03092444346969738	0.0
17875601	0.024844635001500002	0.0597888953052		5.91601046775	0.0	0.0207100591716	0.0		0.012466127363552449	1.2495205451292	0.0	101.40056721274999	0.1007224819380637	0.0
17875597	0.0440692152903	0.186064482084		41.1908618064	0.0	0.158726178536	0.0		0.02464391364068292	2.280593495669	0.0	140.66839104506	0.2162510056318636	0.0
17877635	0.0016658312308800002	0.000290782107186		0.012815434321999998	0.0	0.007454739084130002	0.0		0.003725315520784817	0.002077015051331	0.000207701505133	0.05684706936157996	0.013036164844405188	0.0022920146114488826
17876523	0.240774725357	0.0421477399686		0.386842841468	0.0	0.437639696021	0.0		0.03882723663948978	5.081429368117601	0.0	14.574876559373	0.4741031390134493	0.0
17875541	0.00011994225517200001	0.00943923769955		2.02373053866	0.0	0.008130081300810001	0.0		0.00011994225517200001	4.4612829968649494	0.0	44.5691648843015	0.0393958693476404	0.0
17877667	0.00014208226871	0.00145391053593	0.000249241806159	0.35467109016500004	0.0	0.00421268359331	0.0	0.0007161070583089612	0.00014208226871	3.8978861584159294	3.54987975643616	4.558309397655	0.03751026272578529	0.03598207491258708
17875501	0.000224818426216	0.00100203550392		0.027453203485500004	0.0	0.0224525043178	0.0		0.000224818426216	0.2888657760342199	0.0	10.745991263734	0.09449617405720864	0.0
17875639	0.0017477292980099999	0.00240746472264		0.8888325878650001	0.0	0.00241351568785	0.0		0.0017477292980099999	2.8488852986781503	0.0	56.497913468301896	0.066177696282712	0.0
17877761	0.00990728822224	0.0		0.0	0.0	0.00834202294056	0.0		0.00990728822224	0.0019939344492731	0.0	0.29449382563360005	0.006358984549653415	0.0
17875621	0.011224161724900001	0.0		0.618161044622	0.0	0.0	0.0		0.011224161724900001	0.3681474708955	0.0	5.819943875885	0.007359863072302303	0.0
17875547	0.013844335234700002	0.0342857139185		0.536610744603	0.0	0.004402054292	0.0		0.011917886762556838	7.0856392024955	0.0	19.716194363362998	0.02324116205807077	0.0
17875223	0.0351690183553	0.0		0.0124320985342	0.0	0.0	0.0		0.02089137535128417	0.08803400400210143	0.0	0.6650605164468001	0.02022940563085484	0.0
17866802	0.0	4.22619022056	4.10952499323	28.013295050700002	0.0	0.150406504065	0.0	0.15443227599642215	0.0013557880752151053	88.99192040756	82.67292389292	952.4574808287	0.06426264800858238	0.06371734434443446
17876189	0.00481441175055	0.0		0.3979635449360001	0.0	0.0	0.0		0.024211482257446296	0.014379979145800003	0.0	1.8907656389904	0.015162697081498776	0.0
17875219	0.013156996156899999	0.0		0.0268599242263	0.0	0.0	0.0		0.013156996156899999	0.07289151477740141	0.0	0.6559449947672	0.010648428707460984	0.0
17876187	0.05175228341469999	0.00615163624752		2.35181785771	0.0	0.0014850354123800002	0.0		0.053198020623683034	0.024790440487760003	0.0	3.872065713484099	0.010784953250694226	0.0
17876273	0.0	0.0110697087948		0.1235146455	0.0	0.0896226415094	0.0		0.00011679681255739536	4.451843759165398	0.0	42.545434345641496	0.05683912119063465	0.0
24612156	0.010700247202000001	0.0		0.136282403022	0.0	0.0	0.0		0.010700247202000001	0.00473202788271	0.0	2.247713244292	0.0006248437890526156	0.0
17875607	0.00443194688483	1.07434826629		17.2719501784	0.0	0.0620635389004	0.0		0.003489696253324743	1.7589689560857302	0.0	28.645958151693	0.1254389151228931	0.0
17875671	0.0	0.0		0.00120373236132	0.0	0.0140559112916	0.0		0.0	2.83042806913791	0.0	55.23725525786722	0.052335582903261096	0.0
17875641	0.0231151233696	0.0		0.0051575287664	0.0	0.0	0.0		0.0231151233696	0.0014967579772899998	0.0	0.2115056151938	0.017324783440216988	0.0
17875483	0.04449830210919999	0.0		0.000607511911994	0.0	0.0	0.0		0.052724015263345324	0.0006600534827617	0.0	0.020047893095784	0.020466226138027083	0.0
17875723	0.006325105848260001	0.000306492409436		0.00521037096041	0.0	0.000607902735562	0.0		0.004200564844726564	0.08774799408278401	0.0	8.15526555315841	0.018904612725508314	0.0
17875447	0.0463159484211	0.0		0.0212781962382	0.0	0.0	0.0		0.04808423139253932	0.00024300476479782002	0.0	0.038945299408619	0.0040632255759965605	0.0
17875693	0.0006398053568280001	0.0		0.961867140693	0.0	0.000579150579151	0.0		0.0006398053568280001	0.054970444500199986	0.0	1.841667819739	0.0314794077392266	0.0
17876171	0.013791985386	0.00473202788271		2.11143084127	0.0	0.0006565988181219999	0.0		0.01364245993271232	0.04258825094441	0.0	3.076155080086	0.007581721009232375	0.0
17876465	0.882690680314	0.0540768904102		0.0996358743359	0.0	0.602941176471	0.0		0.4106138745672212	2.6404862583165	0.0	4.5443642475309005	0.4833047128407309	0.0
17876245	0.00198166312651	0.00141960836481		0.107890235726	0.0	0.122950819672	0.0		0.004720555139449459	0.012303272495040004	0.0	0.518969026453	0.06508117345481759	0.0
17876235	0.0109540629959	0.0		0.8407503381020001	0.0	0.00016742005692299994	0.0		0.0109540629959	0.08192463830350001	0.0	8.930021727474788	0.0121573828470384	0.0
17875227	0.0258768856242	0.0		0.0266951394151	0.0	0.0	0.0		0.0258768856242	0.08803400400210143	0.0	0.6793235573277	0.0191889218595349	0.0
17875571	0.00454232437259	0.0		0.380176526232	0.0	0.0	0.0		0.00454232437259	0.01475375720474	0.0	1.229907412198	0.007952286282321648	0.0
17865930	0.0176517267454	10.2179078296	6.85555307416	10.343890263099999	0.0	0.251184834123	0.0	0.27018079668085504	0.0076805166275698425	10.2179078296	6.85555307416	10.343890263099999	0.05978413890196856	0.05806884893759962
17876251	0.104802977214	0.0		0.000160908560474	0.0	0.0	0.0		0.03250167418966832	0.0006469180900698999	0.0	0.017404395316560496	0.02138877835256183	0.0
17875665	0.0155006937522	0.00513174163643		0.8595003280060001	0.0	0.006864988558350001	0.0		0.01392540000716196	0.006804565200580001	0.0	4.58530767744013	0.014273753040148343	0.0
24612214	0.06987415474780001	0.355628125675		1.86533958863	0.0	0.060839473096699986	0.0		0.06987415474780001	0.366688197245678	0.0	1.900934818969888	0.0993819128171674	0.0
17877603	0.000654384832739	0.0		0.0	0.0	0.00108695652174	0.0		0.000654384832739	1.6826485997597842	1.4412545854820749	3.3307132163058997	0.022362182435771646	0.011431559955066038
17875231	0.0377340632805	5.49282704014e-05		0.0121995451627	0.0	0.00377714825307	0.0		0.0362414157401349	0.1112209406274014	0.0	0.8698014168766	0.03184446492918105	0.0
17875523	0.0180860158816	0.0		0.234915853143	0.0	0.0	0.0		0.0180860158816	6.736476280842298	0.0	19.330314576183	0.03267003267003599	0.0
17875631	0.0	0.000213822568185		0.490508971416	0.0	0.000362713093943	0.0		0.0	3.9124192036464844	0.0	51.884455187486	0.06732937933342506	0.0
17876259	0.0654231679676	0.0016374953702300002		0.00471598666627	0.0	0.347222222222	0.0		0.018494304775891004	0.8446880831469099	0.0	9.088284941039273	0.42307692307667055	0.0
17875409	0.0919973743856	0.0		0.017651494312799998	0.0	0.0	0.0		0.0919973743856	4.92577225941e-05	0.0	0.02990681569422	0.0011355034065095744	0.0
17875337	0.09594033147360001	0.0		0.698920518276	0.0	0.0	0.0		0.09594033147360001	0.01324967807159	0.0	1.4158227425066001	0.0045224793828130576	0.0
17875297	0.008999123337209999	0.0		0.0463777696423	0.0	0.0	0.0		0.008999123337209999	0.00851765018888	0.0	0.3428404646108	0.007237778832460061	0.0
17875391	0.0928645938525	0.0		0.0081308080762	0.0	0.0	0.0		0.12469937623428895	0.011146371984050621	0.0	1.4672701505202577	0.01201063918210468	0.0
17875397	0.0288349849856	4.92577225941e-05		0.00929000648125	0.0	0.00209907640638	0.0		0.05238219998502537	0.01119562970664472	0.0	1.4684293489253075	0.011083564240914187	0.0
17877389	0.554344463762	1.03983580115		11.734913367599999	0.0	0.40060331825	0.0		0.1976988862708052	1.2793103081186998	0.0	65.04493305108059	0.12543733557529804	0.0
17875323	0.24264513425	0.0		0.000473202788271	0.0	0.0	0.0		0.2058562344244	0.0	0.0	1.3940554142463712	0.00012928248222316744	0.0
24612194	0.106165060088	0.0		0.000699459660837	0.0	0.0	0.0		0.106165060088	0.000124786230572	0.0	0.033408731389037	0.002607266337925977	0.0
17877577	0.0	0.0		0.0	0.0	0.0	0.0		0.0	8.38340552098	0.0	83.40387444728	0.13508917080362792	0.0
17876163	0.022791479539099997	0.0		0.0	0.0	0.140571428571	0.0		0.014709331685990402	0.03738302027344	0.0	0.6142172191765	0.09143631844537063	0.0
17876161	0.053129591625699996	0.0		0.0	0.0	0.0458803747298	0.0		0.053129591625699996	0.00899085297714	0.0	0.38944589474749997	0.08193246601371347	0.0
17866206	0.0691903832875	0.109201779822	0.109201779822	0.109201779822	0.0	1.0	0.0	0.9600364202595664	0.0033221567334294857	2.3899841317900004	2.133555762702	115.212557835873	0.7574156846811165	0.7192240554381772
24612154	0.0459894157393	0.0		0.0154667696552	0.0	0.0	0.0		0.0459894157393	0.037008623669	0.0	0.8112751257652	0.0180180180179984	0.0
17866230	0.138076093462	0.0	0.0	0.0	0.0	1.0	0.0	0.9999999999920702	0.01402869078059114	6.45869766257	19.80089287877	53.906744525600004	0.2670768458057844	0.3646627412500141
17875291	0.00514706887008	0.0		0.0	0.0	0.0	0.0		0.00514706887008	0.06672159314626999	0.0	0.757597664022	0.036902800658986594	0.0
17865844	0.0250976016283	3.96647918131	6.6003146730400015	30.7539258447	0.0	0.418965517241	0.0	0.6219137122008969	0.01457255308670191	21.3848873830856	31.6687849544486	193.38873797539856	0.3423503325939957	0.3832166228634909
17875537	0.000504461267035	0.0		0.017509928100499998	0.0	0.0	0.0		0.000504461267035	4.616805606551	0.0	44.65498864432049	0.06324722790062287	0.0
17865854	0.0444508130346	3.5318258036900003	3.4533413685900003	20.102113011300002	0.0	0.196172248804	0.0	0.18767493185614373	0.010325924805570158	24.547219041505	34.74255506471501	213.11127972837502	0.3054887820510939	0.3407410159030345
17875393	0.144812621312	0.0		0.00227570678385	0.0	0.0	0.0		0.10300780001495076	1.64192408647e-05	0.0	0.005759869695333	0.0010021295252427083	0.0
17875381	0.0	0.0		0.000197030890376	0.0	0.0	0.0		0.11668400923265562	4.92577225941e-05	0.0	0.002026134322701	0.006731595531359003	0.0
17877771	0.0336648918965	0.0		0.00628451102784	0.0	0.00151933701657	0.0		0.0336648918965	0.0007567735792689999	0.0	0.02541443098384	0.01270741440870672	0.0
17875583	0.132585468371	0.035308276565		1.39355390606	0.0	0.3	0.0		0.02685555497868642	2.0945290135850003	0.0	99.47752923866	0.24342572850065106	0.0
17875647	0.000205249834998	0.026737293344900003		0.550965525268	0.0	0.129041021462	0.0		0.0005305077365798473	1.7455072476198397	0.0	21.087036859048094	0.0886421658850897	0.0
17877397	0.0117291877064	2.50055909419e-05		0.183286656084	0.0	0.07311586051739999	0.0		0.0006486456939525876	11.536929779650242	0.0	972.555397623039	0.16135464472181893	0.0
17877627	0.00232692777336	0.0		0.114635242815	0.0	0.0	0.0		0.00232692777336	0.005157872656124001	0.000836411782075	0.2724662408619	0.02102442543542023	0.003441056803276807
17875373	0.07616003928580001	0.0		0.0	0.0	0.000429553264605	0.0		0.07616003928580001	4.92577225941e-05	0.0	0.0013857839289779998	0.005339695523738954	0.0
17875367	0.0	9.85154451882e-06		0.000489293377768	0.0	0.0037037037037	0.0		0.07647672434911762	0.011146371984050621	0.0	1.4591393424440575	0.014249087861147956	0.0
17865906	0.0	11.3874851449	9.94101187028	106.413633131	0.0	0.116150442478	0.0	0.10056284629635286	0.005011703847263757	135.52199768949998	95.12037005724001	981.2726683692999	0.1415494023301872	0.1286237057920548
17875643	0.0412370140429	0.00384880622732		2.0165606405500003	0.0	0.00155865463495	0.0		0.0412370140429	3.9160541873056203	0.0	53.410506856619996	0.03849747710710479	0.0
17876225	0.0	0.609270757326		1.7273465554299998	0.0	0.0805998125586	0.0		0.0	3.9122053810783	0.0	51.393946216070006	0.08736705014113637	0.0
17875593	0.0195245526823	0.0		0.504407438348	0.0	0.0	0.0		0.0195245526823	0.3681474708955	0.0	5.7061902696110005	0.007972559562422583	0.0
17876525	0.000620134288675	0.0253401639784		0.331417144629	0.0	0.041943205309499985	0.0		0.000620134288675	0.033565217203428	0.0	0.35252228120218804	0.0769207844071833	0.0
17875595	0.026879431989999997	0.0072223941679099984		0.023673403105900003	0.0	0.159292035398	0.0		0.00046614116250306926	2.83042806913791	0.0	55.236051525505886	0.08047296521636707	0.0
24612188	0.197989739132	0.0		0.00214106900876	0.0	0.0	0.0		0.197989739132	0.00326789858990944	0.0	1.946682034230849	0.023031601499717967	0.0
17875377	0.0329794575014	1.31353926918e-05		0.000968735211018	0.0	0.0054347826087	0.0		0.04713732381407958	0.016256789615709	0.0	5.019844918835312	0.04574299312533092	0.0
17875611	0.046569206130099995	0.00113293615868		0.00294563401258	0.0	0.384615384615	0.0		0.0004329107868436449	1.71378503517673	0.0	20.527914193437574	0.07587993295756144	0.0
17875685	0.0500984765388	0.0		0.0014611738136	0.0	0.0189013585351	0.0		0.026407749139555885	0.0	0.0	0.0893422493375	0.010458759210834829	0.0
17875331	0.07159772766189999	0.0		0.382347852923	0.0	0.0	0.0		0.07159772766189999	0.0113568669185	0.0	1.3959482254000002	0.0033740652927254514	0.0
17875459	0.173451957552	3.28384817294e-06		0.0102751609331	0.0	0.00024230676035900004	0.0		0.173451957552	0.0009326128811153401	0.0	0.04321872580404	0.017448808859881232	0.0
17876517	0.483079490686	4.2425478974400015		13.225454355799998	0.0	0.433286018453	0.0		0.4074747080278252	4.394541863054002	0.0	236.0251558518	0.2731317982767009	0.0
17875545	0.04790584591080002	0.0		0.57475506328	0.0	0.0	0.0		0.04790584591080002	0.01240170895471	0.0	1.09802831875271	0.009514326806080048	0.0
17875269	0.0	0.0		0.0	0.0	0.0198961937716	0.0		0.0025461033690212928	0.0283921672963	0.0	0.224771324429	0.046926730962959316	0.0
17877743	0.00434296234415	0.0		0.0	0.0	0.0	0.0		0.00434296234415	0.000996967224637	0.0	0.16002722334088898	0.03396472893532153	0.0
17877757	0.016708433398700002	0.0	0.0	0.09513041163339997	0.0	0.024087024087	0.0	0.00184203279000895	0.01823750509568435	0.0018693135461931	0.0	0.6053775243239999	0.015842739492390158	0.0010639751366566515
17866296	0.232516216267	0.024357372331	0.0259260255843	0.475668848198	0.0	0.8043478260870001	0.0	0.7981890381389009	0.006688099016785802	10.242265201931	6.8814790997443005	10.819559111297998	0.06298476777875682	0.06125037671100959
17875283	0.00979809002858	0.0		0.0	0.0	0.0	0.0		0.00979809002858	0.0	0.0	0.0	0.007924940790672462	0.0
17876173	0.0033999516563299995	0.0113568669185		0.450962257222	0.0	0.0073301381449100015	0.0		0.002623369268001416	0.06908760708759	0.0	1.4371725013763	0.02307233309022607	0.0
17876175	0.0010892459915499998	0.0		0.622261666576	0.0	0.0	0.0		0.0010892459915499998	0.0175883085562	0.0	1.7631508881871	0.02662052442432998	0.0
17875261	0.011707270245	0.0		0.0	0.0	0.0223476297968	0.0		0.020107414197284547	0.0283921672963	0.0	0.224771324429	0.037356069262503504	0.0
17876479	0.283381290386	0.0		0.0	0.0	1.0	0.0		0.12020041641358095	3.1543775745980005	0.0	845.6740251955002	0.15511535986792485	0.0
17877387	0.588311561459	0.153768604869		2.47457221928	0.0	0.241521068859	0.0		0.1886932581569072	0.47512716074600003	0.0	8.53651170106	0.061830730371037625	0.0
17866806	0.0016333391430400001	6.4296657266100015	7.240947062619997	46.2412065733	0.0	0.0787794729542	0.0	0.08113924869301503	0.0005642578196037633	95.42158613417	89.91387095553999	998.698687402	0.0666215911651725	0.06654835471976163
17877689	0.00736633820924	0.000373862709239		0.150085107609	0.0	0.00113096584483	0.0		0.00736633820924	0.002160095653381	0.0	0.17883660168096	0.0051111679018668935	0.0
17875725	0.00179735018065	0.0		0.0993035406573	0.0	0.00027344818157	0.0		0.0013830204742092964	0.08744150167334801	0.0	8.2493587228553	0.015529328245632485	0.0
17875505	0.185674008318	21.6191726459		33.507018484899994	0.0	0.467984189723	0.0		0.11173552930226464	30.090534115470003	0.0	66.15312549657	0.39297706994140463	0.0
17875599	0.017520039883	1.00366716774		54.2936949386	0.0	0.103555652111	0.0		0.015416807136131987	3.2842606634090004	0.0	194.96208598366002	0.15694195662963004	0.0
17875651	0.000756598381701	0.0389206796826		0.506771324115	0.0	0.079280155642	0.0		0.0006729903290694164	2.88539851363811	0.0	56.1158522045519	0.08220954356845916	0.0
17875623	0.00125777108453	0.016049764817600003		0.373029354931	0.0	0.10861423221	0.0		0.0016283327269733467	2.8464778339555097	0.0	55.6090808804369	0.08284272497897219	0.0
24612210	0.0150641149751	0.0		0.0320691123925	0.0	0.0	0.0		0.0150641149751	0.0190669981712	0.0	0.40659646644749997	0.04753298391470883	0.0
17876507	0.585127514006	0.00630004076811		0.0157151016938	0.0	0.572337042925	0.0		0.02785884805095816	0.006440041674068001	0.0	0.015855102599758	0.12739408009280176	0.0
17875711	0.0	0.0		0.0	0.0	0.0	0.0		0.0006432758632065808	8.38340552098	0.0	83.40387444728	0.1635867750196888	0.0
17875509	0.104120238783	0.8040249465270001		60.74383283939999	0.0	0.0960202147821	0.0		0.10035137935643876	25.371187238776997	0.0	110.5833198887	0.2241561688622236	0.0
17876229	0.000160620527783	0.0		0.7513725046009999	0.0	0.0	0.0		0.000160620527783	3.28544683248729	0.0	46.060215735486004	0.04940741880868608	0.0
17875271	0.00245197055759	0.0		0.0	0.0	0.00934579439252	0.0		0.0025180223703947604	0.03170458681419	0.0	0.3492236577445	0.06908559874179457	0.0
17875727	0.000585638479119	0.047356731433		0.362173205707	0.0	0.0401068287517	0.0		0.0005401708283862363	0.07409402477789999	0.0	0.913138730975	0.05299629892126509	0.0
17877769	0.0301592976717	0.0		0.0	0.0	0.005962897526500001	0.0		0.0301592976717	0.0	0.0	0.09513041163339997	0.01937004253360628	0.0013626257045301288
17875285	0.0	0.0		0.0	0.0	0.0	0.0		0.007643137443419058	0.0	0.0	0.0	0.00938308886971552	0.0
17875479	0.0	0.0		0.000371074843542	0.0	0.0	0.0		0.015678600850799345	0.000456454896039	0.0	0.016448795498242994	0.01605191256830378	0.0
17876521	0.356662201985	0.7967337307089999		0.962579362105	0.0	0.7717287488060001	0.0		0.1686270853238974	5.039281628149001	0.0	14.188033717904995	0.4863085440671839	0.0
17875519	0.188199234943	0.928179145791		14.7992457177	0.0	0.226712149042	0.0		0.09881938300132967	23.351376738218	0.0	109.050097042	0.2257889990981465	0.0
17875351	0.0681763915163	0.0		0.551281248336	0.0	0.0	0.0		0.0681763915163	0.000946405576542	0.0	0.8844160112793	0.005773672055430263	0.0
24612180	0.197807199687	0.0		0.0038125477287800007	0.0	0.0	0.0		0.19780719968700008	7.881235615062e-05	0.0	0.020868855139038002	0.0056928838951389215	0.0
17875633	0.000741039460253	0.000213822568185		0.961346266558	0.0	0.000218435998253	0.0		0.000741039460253	0.005345564204614999	0.0	2.799735088993	0.007675111773464685	0.0
17877567	0.000537482674849	0.0		0.0	0.0	0.0	0.0		0.000537482674849	0.08744150167334801	0.0	8.2493587228553	0.01339866778960512	0.0
17875531	0.120821352722	0.0		1.38442161425	0.0	0.0	0.0		0.120821352722	0.09289603254	0.0	6.968403552369999	0.016713786795256258	0.0
17875405	0.0462807167114	0.0		0.00296531490017	0.0	0.0	0.0		0.08013094642069388	4.92577225941e-05	0.0	0.01225532138142	0.0017201834862375553	0.0
17875649	0.0414707612516	0.0		0.00529265696309	0.0	0.0	0.0		0.0414707612516	0.0	0.0	0.01022786489694	0.014973882762632748	0.0
17875265	0.00455564200614	0.0		0.0	0.0	0.0	0.0		0.00455564200614	0.0	0.0	0.0	0.013340623291393504	0.0
17875325	0.530935766118	0.0		0.0108836641302	0.0	0.0	0.0		0.10651800567348586	0.0	0.0	1.4044658755883002	0.00012913223140446797	0.0
17877575	0.027714020686400002	0.0		0.0	0.0	0.0	0.0		0.027714020686400002	0.0	0.0	0.7338502965289	0.007917580845175236	0.0
17875341	0.0309637566231	0.0		0.249044381257	0.0	0.0	0.0		0.030963756623100008	0.0388824340284	0.0	1.610289525428	0.021432560737228545	0.0
17875451	0.10130285724400001	6.56769634588e-06		0.0127150601256	0.0	0.000352298749339	0.0		0.10130285724400001	0.0009358967292882801	0.0	0.04565862499654	0.016471559357674262	0.0
17875657	0.0	0.0		0.0014967579772899998	0.0	0.0263157894737	0.0		0.0006062710501812245	0.08192463830350001	0.0	8.089271389372788	0.021581787077247543	0.0
17876469	0.000302135146286	0.0		0.263635958876	0.0	0.0322217532011	0.0		0.000302135146286	0.6095622199502421	0.0	2.840159391915	0.06955032119919037	0.0
17875579	0.0481403337879	0.0179005584505		0.18866934476	0.0	0.0525114155251	0.0		0.026940429257064868	2.0771212954705005	0.0	98.27264467736	0.2294825511435005	0.0
17866188	0.0720347266373	32.5173387581	27.943110506500002	32.5173387581	0.0	0.990243902439	0.0	0.8640926182399171	0.006893504625508919	68.859733745174	30.382393439987002	1025.8511788949831	0.5241232731138616	0.4409822427448663
17865866	0.0	5.79300763831	2.69622270297	273.365612931	0.0	0.182320441989	0.0	0.11562999021595645	0.0	94.104949819115	63.712431083085	607.783110928375	0.29323204419877524	0.2869910948951835
17865868	0.0	0.366551315645	0.17991604446400006	6.50007740117	0.0	0.107714701601	0.0	0.04907606320258388	0.0	53.109978357726	52.044428533373	692.13453141377	0.1290459064945536	0.1110455971625514
17875719	0.00713588378161	0.0		4.87181840319	0.0	0.0	0.0		0.00713588378161	0.00857740273205	0.0	5.635518427080001	0.012318954659936744	0.0
17875319	0.00289179328897	0.0		0.0869586059125	0.0	0.000230096640589	0.0		0.0052459479427457685	0.04740008421728	0.0	1.6577078391395	0.02473616992673489	0.0
24612166	0.203733797896	0.0		0.0525255094981	0.0	0.0	0.0		0.203733797896	0.0	0.0	1.4465809237444711	0.00012426991425328694	0.0
17866278	0.0405743796328	7.79555496387	14.6479577167	123.845654363	0.0	0.262785208497	0.0	0.2603591340855695	0.02360665368577116	9.409276859951401	16.2717567258344	125.46945337213438	0.3909798831925185	0.3899522773671904
17865848	0.0	1.42444356065	0.00727428565733	8.1582170641	0.0	0.5714285714289999	0.0	0.2589491175175986	0.0	55.662668400836	53.10235692115033	704.39917993578	0.1339104936116263	0.11297729953612308
17875697	0.00463194010496	0.0		0.4629258601199999	0.0	0.0	0.0		0.00463194010496	0.0	0.0	1.1967761566489	0.008823216753478472	0.0
17876489	0.498536649401	3.00626162672		68.9358480273	0.0	0.165023389709	0.0		0.498536649401	6.05532460581	0.0	92.4091113118	0.1887507934921265	0.0
17876513	0.0314591135703	0.0028350183456500003		0.0144900937667	0.0	0.192640692641	0.0		0.06799010495756594	0.011060071570678004	0.0	0.035595230339887984	0.12146603556348615	0.0
17875683	0.0314523904893	0.0		0.0	0.0	0.00369003690037	0.0		0.02661797485165502	0.0	0.0	0.0878810755239	0.008332093438482359	0.0
17877747	0.010519456387499999	0.0		0.0	0.0	0.000394088669951	0.0		0.010519456387499999	5.922575837760001e-05	0.0	0.0044485125181400005	0.02187913542126031	0.0
17877587	0.09142209850199999	0.0	0.0121357000899	0.86246205552	0.0	0.0669642857143	0.0	0.15364701497773378	0.011670195847015695	10.902109242	2.1941457876999	34.16313563312	0.1942294159041156	0.1864247008723252
17875353	0.0	0.0		0.0525255094981	0.0	0.00106382978723	0.0		0.03383530841143835	3.28384817294e-05	0.0	0.33476453759116803	0.010538243626057296	0.0
17875221	0.0205269546515	0.0		0.040122188715	0.0	0.0	0.0		0.0205269546515	0.07287322939371	0.0	1.3028599436507	0.02903265406335156	0.0
24612196	0.072993079904	0.0		0.004741876761729999	0.0	0.0	0.0		0.072993079904	0.00011821853422581999	0.0	0.016796883404600997	0.004935292827373439	0.0
17876493	0.661619114965	0.0702336262912		0.07717028073969999	0.0	0.468067226891	0.0		0.1332650251588501	3.2246112008892007	0.0	845.7511954762398	0.16186152411287458	0.0
17877607	0.000562668086426	0.0		0.0	0.0	0.00034958923265199985	0.0		0.000562668086426	2.2478460958488338	2.129645711090076	4.194322664974299	0.03126362605736518	0.032297361977993336
17877611	0.00023308107592299998	0.0	0.0	0.0	0.0	0.000538938291566	0.0	0.0005555057752663869	0.00023308107592299998	2.246905132594	2.128809299308	4.164039624589	0.03793337028140383	0.04162768847902723
17877765	0.009523569525790001	0.000111870876935		0.0244404962905	0.0	0.00299665080204	0.0		0.009523569525790001	0.0001710966353126	0.0	0.029066686083773	0.021842039697695968	0.0
17866274	0.0318427857323	9.19823068206	9.98581289581	38.3544580988	0.0	0.329563812601	0.0	0.2521068564059974	0.01829540865006929	17.3915359003014	25.041597979934398	162.60793982922442	0.3135669362082543	0.2982590784549013
17875427	0.0547072342861	0.0		0.184678810241	0.0	0.0314371257485	0.0		0.03618113568001277	0.00129712002831	0.0	3.8607727386210007	0.04183867526318452	0.0
17875401	0.05018078208000002	0.0		0.017502910761799998	0.0	0.0	0.0		0.05018078208000002	0.00329416937529294	0.0	1.964331852538616	0.01606484893145535	0.0
17877751	0.04360805252259999	0.0		0.0	0.0	0.0404174258738	0.0		0.04360805252259999	0.0029493613728800005	0.0	0.25767448726803005	0.022857924993169004	0.0
17875663	0.0006269208558940001	0.0		0.00684232218191	0.0	0.0	0.0		0.0006269208558940001	0.08192463830350001	0.0	8.096113711554699	0.014982642061027231	0.0
24612152	0.16139866396400002	0.0		0.0435346565209	0.0	0.0	0.0		0.16139866396400002	0.10599742457271	0.0	1.2090331240321002	0.06605527326805605	0.0
17875313	0.059011517880199996	0.0		0.900978108868	0.0	0.0	0.0		0.059011517880199996	0.00615163624752	0.0	3.252795966578	0.0011892781996134408	0.0
17876515	0.7577594723800001	1.19990133574		2.00826404116	0.0	0.578562935281	0.0		0.5858650528844144	1.200041336645958	0.0	2.008404042065958	0.2330576307363214	0.0
17877649	0.0	0.0		0.19445014910500005	0.0	0.0	0.0		0.0	0.002907821071862	0.000373862709239	0.5160551596525	0.01679578922469271	0.004200767449953816
17876461	0.0	0.106624229815		0.741218066931	0.0	0.011524214569899998	0.0		0.0	11.622723875348	0.0	972.181251617081	0.15093190035715895	0.0
17876487	0.6547482357150001	3.98810302117		14.637225586	0.0	0.467526787667	0.0		0.387859794879965	21.18170458407	0.0	324.158841973	0.19447883553615924	0.0
17875263	0.0114000760138	0.0		0.0	0.0	0.000467945718297	0.0		0.0114000760138	0.03170458681419	0.0	0.3492236577445	0.06628914057289173	0.0
17875735	0.0	0.0		0.0	0.0	0.0	0.0		0.0	8.38340552098	0.0	83.40387444728	0.16024208058468614	0.0
17875609	0.0651790469906	0.202090609382		2.27624865042	0.0	0.63126252505	0.0		0.0059924532468477116	1.4516111545111998	0.0	103.67681586316999	0.11293596604550307	0.0
17875485	0.18395874634	1.53526880205		1.67641286127	0.0	0.415	0.0		0.14557656138217254	5.5233718232200015	0.0	16.313638447269998	0.4653257909074358	0.0
17877681	0.0027583123453099995	8.30806020531e-05		0.145931077506	0.0	0.000569313976658	0.0		0.0027583123453099995	0.007726495990933102	0.0	0.6722051512109999	0.011430678466112098	0.0
17875529	0.0202824968888	0.0		1.17025091567	0.0	0.0	0.0		0.0202824968888	0.03418973872611	0.0	1.83540787809371	0.009423897581807185	0.0
17875277	0.00335782303107	0.0		0.0	0.0	0.00027578599007200004	0.0		0.00335782303107	0.0283921672963	0.0	0.224771324429	0.03092783505151608	0.0
17875465	0.04749261082230001	1.31353926918e-05		0.011417940097299998	0.0	0.00318292454597	0.0		0.04749261082230001	0.0004597387442118	0.0	0.030628451908999994	0.014476555431404938	0.0
17866184	0.012433304588299998	3.16928474512	3.16928474512	3.16928474512	0.0	1.0	0.0	0.9920738441357306	0.006276978747742659	71.74664700818101	33.269306702994015	1028.7380921579902	0.477845149253899	0.3865689006310599
17876491	0.000169900927411	0.0		0.0	0.0	0.0146062658764	0.0		0.000169900927411	3.2246112008892007	0.0	845.7511954762398	0.14496818689617866	0.0
17876155	0.0129473655406	0.0		0.0201691972325	0.0	0.0	0.0		0.0129473655406	0.08419345342550999	0.0	1.1087715047762	0.014035667106985254	0.0
17875309	0.0	0.0		0.121613116586	0.0	0.0	0.0		0.001683585300654787	0.0378562230617	0.0	1.086337355402	0.01737471125839548	0.0
17877645	0.000795138130698	0.0	0.0	0.0	0.0	0.0409431442012	0.0	0.017376403180454813	0.000795138130698	8.38340552098	0.0	83.40387444728	0.10305429864265248	0.008461659682246929
24612204	0.05374209921900002	0.0		0.0023906414699	0.0	0.0	0.0		0.05374209921900002	0.0006600534827617	0.0	0.022438534565684	0.017811501597439543	0.0
17877595	0.0023109679781399997	0.015382401965299997	0.000404523336329	7.0592806794700005	0.0	0.0104780615586	0.0	0.0006300722812707648	0.0023109679781399997	10.9174916439653	2.194550311036229	41.222416312590006	0.0763153471170916	0.06719945383141908
17875489	0.273056257831	0.0649866499007		0.483725696453	0.0	0.7071428571430001	0.0		0.13767403191132255	3.777339462830701	0.0	8.292820613833001	0.6158028271112181	0.0
17876473	0.532822190089	17.830320413499997		91.9277837644	0.0	0.317997775306	0.0		0.5674704098007252	20.45498259500589	0.0	95.4994926629159	0.3560759588681591	0.0
17875553	0.030185844323299998	0.0		0.550593113076	0.0	0.0	0.0		0.030185844323299998	0.01368464436382	0.0	1.1719614962209999	0.0073812933788848425	0.0
17875461	0.129607464291	0.000216733979414		0.00174372337983	0.0	0.117903930131	0.0		0.09008885011145756	3.0743307866424243	0.0	23.30064806153183	0.056172906102752766	0.0
17876471	0.40934565306000004	17.1936015629		309.521616387	0.0	0.145148546144	0.0		0.446897134086646	19.813282692690198	0.0	313.13390321772584	0.20365597232570026	0.0
17877673	0.011718566192700001	0.00195162749151		0.242977622693	0.0	0.00606950562898	0.0		0.011718566192700001	0.00954903451202	0.0	0.4525684750845	0.014530114834782	0.0
17875573	0.011150236732700002	0.00167321853405		0.910323395055	0.0	0.00963718820862	0.0		0.005425246967944802	0.68462068979573	0.0	11.374007973292999	0.2268934026136957	0.0
17843794	0.0747635367925	0.0	0.0	0.0	0.0	0.202785030461	0.0	0.13620640529639738	0.03365267902842374	0.0	0.0	0.0	0.04096144587236705	0.014018440723842682
24612148	0.025432816780300002	0.0		0.00302105487208	0.0	0.0	0.0		0.025432816780300002	0.03832942585	0.0	0.258981363527586	0.05171733122780097	0.0
17875371	0.006644470094710001	1.64192408647e-05		0.00117561764591	0.0	0.00173181593271	0.0		0.0662571714478488	0.0001182185342259	0.0	0.009821989885268	0.008757727406539404	0.0
17877691	0.030759714016299997	0.0017425245459899998		0.292325917835	0.0	0.00869301526332	0.0		0.030759714016299997	0.0093399315665	0.0	0.5019167702265	0.01589492219102784	0.0
17875293	0.0	0.0		0.0	0.0	0.0	0.0		0.0010816150918037026	0.0	0.0	0.0	0.008930404434407957	0.0
17875705	0.0649181244405	0.0		0.0	0.0	0.0280151946819	0.0		0.02813362389680234	0.0	0.0	0.0662494119736	0.016804788213633168	0.0
17877663	0.046388841725000005	0.00473966676509		0.0614762659825	0.0	0.0419467598817	0.0		0.03502982318090882	0.01010664236673	0.0	0.2442322403658	0.022988505747126343	0.0
17875251	0.018470106414299997	0.00236601394136		0.4878720747070001	0.0	0.00312109862672	0.0		0.03018287645992012	0.10599742457271	0.0	1.1654984675112001	0.06724703507443153	0.0
17876177	0.010109524739799999	0.0		1.08552719629	0.0	0.0	0.0		0.010109524739799999	0.0175883085562	0.0	2.2264164179010995	0.019944156362185002	0.0
17865896	0.0	1.93756092235	2.04013424588	226.157036005	0.0	0.216339869281	0.0	0.19564853329429105	0.0	70.16300966886	67.43350961913	1066.021373094	0.13403906366484347	0.12811881337292622
17876211	0.0010790963090399998	0.00116523250472		1.63528441058	0.0	0.000387822377351	0.0		0.0010790963090399998	0.056007529950919996	0.0	4.35859748677	0.016335274820902263	0.0
17875659	0.00029906302084	0.00294563401258		2.6649011866	0.0	0.00290113813881	0.0		0.00029906302084	1.7167306691893098	0.0	23.19281538003758	0.05730675299602199	0.0
17875403	0.144839748013	0.0		0.005664638098319999	0.0	0.0	0.0		0.144839748013	1.64192408647e-05	0.0	0.009148801009803	0.0008691873098666384	0.0
17877643	0.004042341053280001	0.00012462090307999998		0.217512579933	0.0	0.000491803278689	0.0		0.004042341053280001	0.0022016359544110003	0.000207701505133	0.27435964929457995	0.005987472365511604	0.0010041287299236263
17875567	0.0142193058275	0.636630614194		2.34269498597	0.0	0.290186125212	0.0		0.006217939530439596	1.47968120197068	0.0	11.426263940343	0.3961661341852073	0.0
17876183	0.0385284159674	0.0		1.3410567019600002	0.0	0.0	0.0		0.05100058007349336	3.28384817294e-05	0.0	1.6758212395511682	0.005960774259707451	0.0
17865592	0.0	11.2353931859	11.5801153345	147.46423999700002	0.0	0.342803030303	0.0	0.32004027840805377	0.0	517.9838034649	178.4610542545	2148.063668197	0.1279898907843837	0.07817754452589434
17875243	0.0	0.0		0.000219713081606	0.0	0.0	0.0		0.024033600323131395	0.04448106209752	0.0	0.390805173257506	0.0588463027487603	0.0
17875423	0.0245088350446	0.0		0.525297241264	0.0	0.015338941118299997	0.0		0.030299275476179006	0.00129712002831	0.0	4.386069979885002	0.03956743002540625	0.0
17875249	0.0041977273167499995	0.0		0.0	0.0	0.0	0.0		0.004325446242157503	0.0	0.0	0.0	0.024482982472355717	0.0
17875669	0.017571353130099998	0.0		0.0034740341202500005	0.0	0.0213703458912	0.0		0.02579907482231821	0.0	0.0	0.06972344609385	0.016545274705522917	0.0
17876269	0.0	0.0		2.84117434878	0.0	0.0980672870437	0.0		0.0006036543129707183	8.38340552098	0.0	83.40387444728	0.16450240680643285	0.0
17876253	0.0	0.0		0.000190463194031	0.0	0.0	0.0		0.01487132797820856	0.000988438300056	0.0	1.200934932764701	0.029047312520102238	0.0
17875345	0.0125491955711	0.0		0.231869366253	0.0	0.0	0.0		0.03912888721037633	0.0113568669185	0.0	1.013600372477	0.0038493549729533188	0.0
17876485	0.0906957085984	0.0		0.0	0.0	0.106966121051	0.0		0.12017175802335045	3.1543775745980005	0.0	845.6740251955002	0.15152847096218353	0.0
17875707	0.0159837148202	0.0		0.0	0.0	0.007320644216689999	0.0		0.01369911389831585	0.0	0.0	0.0878810755239	0.008161246444916344	0.0
17877753	0.00637477614626	0.0		0.0	0.0	0.0	0.0		0.00637477614626	0.003946328597517	0.0	0.40028234069213003	0.01578472639807411	0.0
17877703	0.012870455714499998	0.00473559431703		0.240892205653	0.0	0.0169491525424	0.0		0.012870455714499998	0.026793494162140004	0.0	0.5783656111926001	0.043997107039559065	0.0
17877565	0.0	0.0		0.0	0.0	0.0	0.0		0.0	0.001225969637744	0.0	0.12020199026992	0.0008090614886737062	0.0
17877871	0.005852643976330001	0.0		0.307680814658	0.0	0.00252264648549	0.0		0.005852643976330001	0.005436676583481999	0.000836411782075	0.466208822523296	0.020179472297858846	0.0029812557848292198
17877619	0.00609852905839	0.0		0.255628350897	0.0	0.00422480404692	0.0		0.00609852905839	0.00167282356415	0.0	3.0025472059021303	0.009784450026289814	0.0
17875627	0.0392240887703	0.09289603254		5.583981938119999	0.0	0.019273180554200003	0.0		0.0722412784979198	0.094820435653659	0.0	5.916933580421399	0.019961333977758882	0.0
24612182	0.196666175031	0.0		0.0108169958817	0.0	0.0	0.0		0.196666175031	9.85154451882e-06	0.0	0.03669700333265501	0.0004104528663288118	0.0
17875475	0.0158718118447	3.28384817294e-05		0.00130040387648	0.0	0.0141843971631	0.0		0.02967932152881067	0.0006469180900698999	0.0	0.017243486756086494	0.021754527977329914	0.0
17876205	0.019413527419	0.0		0.00176342646887	0.0	0.0	0.0		0.01610936428788276	0.000988438300056	0.0	1.20074446957067	0.029242608343445168	0.0
17877579	0.0129981334717	0.0		0.0	0.0	0.0	0.0		0.0129981334717	0.0	0.0	0.06478823816000001	0.006070794807139047	0.0
17876495	0.71613759919	3.71235281293		7.80909491738	0.0	0.610920198549	0.0		0.5339636851136232	21.542673226429997	0.0	99.73687868178	0.3733626817739693	0.0
24612206	0.0175494734267	0.0		0.00190791578848	0.0	0.0	0.0		0.0175494734267	0.000456454896039	0.0	0.018356711286723	0.013891625615761615	0.0
17876223	8.18619342766e-05	0.0014967579772899998		0.223230761185	0.0	0.00354789660416	0.0		0.010803419891179543	7.53480263062729	0.0	77.538545806885	0.06081345326554344	0.0
17865862	0.00227046755415	63.7647231393	26.2736533154	121.306218269	0.0	0.4175	0.0	0.2617551872755942	0.0008079955708718863	88.31194218080498	61.016208380115	334.41749799737505	0.32095994475121903	0.3298313710649902
24612192	0.17129301176800002	0.0		0.476694497498	0.0	0.0	0.0		0.17129301176800002	0.00129712002831	0.0	4.862764477383001	0.039428643874364164	0.0
17876237	0.013386281166999999	0.004704096500060001		1.67480008065	0.0	0.0026862026862	0.0		0.013386281166999999	3.2901509289873503	0.0	46.983643311535005	0.03795370105744755	0.0
17877885	0.0263046971881	0.0		0.0	0.0	0.0005810575246950001	0.0		0.0263046971881	5.264511855783001e-05	0.0	0.003915480692743	0.015766164747553532	0.0
17875481	0.00578206290907	0.0		0.16895562697	0.0	0.0	0.0		0.010535527344016457	0.0918509211152	0.0	3.5191214323000004	0.02199816681941244	0.0
17877891	0.25993402072599997	0.0		0.035060014066400004	0.0	0.0	0.0		0.06265642097001314	0.00178623294414	0.0	0.5231930549548001	0.004873179896665302	0.0
17876277	0.0	0.0		0.0	0.0	0.3	0.0		0.006095140798454232	0.00167282356415	0.0	2.7469188550051302	0.015939442427230402	0.0
17876191	0.0	0.0		0.0298117756611	0.0	0.0	0.0		0.0007382043825540082	0.018386283662225	0.0	2.9822039236511	0.03183773027793095	0.0
17875379	0.008513922236390001	0.0		0.0004433195033469999	0.0	0.00255102040816	0.0		0.10846962060372572	4.92577225941e-05	0.0	0.001829103432325	0.006845324788806954	0.0
17875317	0.0609878751212	0.000473202788271		1.54879272601	0.0	0.000206313183412	0.0		0.0609878751212	0.012303272495051	0.0	2.151653078267	0.003365685660613653	0.0
17876169	0.0159224509797	0.0127764752833		0.40790080349	0.0	0.005798728020949999	0.0		0.0159224509797	0.07571244612339001	0.0	1.0448317565035001	0.05476224475223658	0.0
17876201	0.05588478249269999	3.61223299024e-05		0.00469261903913	0.0	0.0043321299639	0.0		0.08640904085225135	0.0009293290329424	0.0	0.032943564870939995	0.02083432657929616	0.0
17875585	0.09591677614460001	0.006307913368800001		1.1539679393200002	0.0	0.0157687253614	0.0		0.026440075868525918	2.0834292088393007	0.0	99.42661261668002	0.2115533017310677	0.0
17875497	0.04695110189809999	9.52315970153e-05		7.8642859227	0.0	0.0013300016121199998	0.0		0.04695110189809999	3.0731650205410324	0.0	31.69784013271	0.02288697447297443	0.0
17875281	0.014316856428200003	0.0		0.0	0.0	0.0	0.0		0.014316856428200003	0.0283921672963	0.0	0.224771324429	0.043490742069715635	0.0
17877561	0.0	0.0		0.0	0.0	0.0	0.0		0.0	0.08774799408278401	0.0	8.15526555315841	0.01734562394687585	0.0
17877725	0.0230596182403	0.0		0.0	0.0	0.0	0.0		0.006409113520073739	0.003946328597517	0.0	0.40028234069213003	0.021542880590888176	0.0
17876241	0.00928737688143	0.00567843345925		0.264993561432	0.0	0.0964419475655	0.0		0.007080190175944485	0.07240002660542999	0.0	1.189667664963	0.05066299130269215	0.0
17866282	0.178050537213	0.0282561091008	0.0282561091008	0.0282561091008	0.0	1.0	0.0	0.9999999999965898	0.028346708489244893	1.6137218960814	1.6237990091344	1.6237990091344	0.9944444444443852	1.000000000000302
17876261	0.018150165346599998	0.00416911709908		7.734146750800001	0.0	0.08732876712330001	0.0		0.007193840360442772	0.8430505877766798	0.0	9.083568954373	0.42430368373739297	0.0
17866868	0.0010474860591900002	0.0		0.0	0.0	0.000290065264685	0.0		0.0010474860591900002	9.78266806807	14.341412717	110.60984839700001	0.012009023354540163	0.003754063357886236
17875721	0.00490200581935	0.000306492409436		0.00275843168492	0.0	0.000414765657404	0.0		0.002819354969096577	0.285241217323244	0.0	10.354584608809919	0.049345522543107874	0.0
17875677	0.009039536274049999	0.00459738614154		0.074477655493	0.0	0.0167410714286	0.0		0.002951745883688841	0.28953211105534804	0.0	10.426303832618	0.0602884971026977	0.0
17875661	0.00962638317027	0.000919477228308		0.117443558585	0.0	0.00398936170213	0.0		0.009307320780092136	0.34472362021900804	0.0	16.267836644874993	0.05134497404435709	0.0
17876243	0.0	0.0		0.0	0.0	0.435606060606	0.0		0.07826052865235514	0.010883664130229998	0.0	0.411078790727	0.06266512549535423	0.0
17875329	0.0	0.0		0.0771320544882	0.0	0.0	0.0		0.0	0.048819692582089985	0.0	1.6606577629984998	0.03132832080200728	0.0
17875433	0.049668582305100004	0.0		0.00555955495679	0.0	0.0	0.0		0.06049080582299132	0.0005648218857458201	0.0	0.021095440662981	0.017753922378206718	0.0
17876511	0.130261551488	0.00178501155096		0.00525003397343	0.0	0.391959798995	0.0		0.003367593503016393	0.008225053225028001	0.0	0.021105136573188	0.1333673700929762	0.0
17866866	0.00039848560699300004	9.78266806807	14.341412717	110.60984839700001	0.0	0.015484536969299996	0.0	0.00486741304400717	0.0005469349872311342	94.06982012083999	97.67804641155001	775.3702612259999	0.033467933491651045	0.032390893970529834
17877675	0.00241804849387	8.30806020531e-05		0.327960676605	0.0	0.0002592240559920001	0.0		0.00241804849387	0.567851104376853	0.6885988271131329	1.28589350419915	0.021125377940069943	0.023169951206279186
17875417	0.0254706602951	0.0		0.0	0.0	0.0014492753623199998	0.0		0.025470660295100003	0.0102898745608	0.0	4.04986340752	0.009234226326329649	0.0
17875435	0.245634167984	0.0		0.00944434734538	0.0	0.0	0.0		0.245634167984	0.000554970341227	0.0	0.02443183040669	0.015191687567185969	0.0
17875295	0.0015495932320699999	0.0		0.0230290248874	0.0	0.0	0.0		0.0015495932320699999	0.0	0.0	0.0230290248874	0.007286432160804213	0.0
17875557	5.9284416234800015e-06	0.0		0.342116109096	0.0	0.0	0.0		5.9284416234800015e-06	0.3584294801348	0.0	5.355296858437	0.011884028275778506	0.0
17876509	0.0931586292567	0.000140000905958		0.000140000905958	0.0	0.0914810887239	0.0		0.11410410296099875	0.17568822270515802	0.0	822.2780721926457	0.10633411418863364	0.0
17877715	0.0	0.0		0.0194408608804	0.0	0.0	0.0		0.05543687748977137	0.00178623294414	0.0	0.4881330408884	0.005127254756610046	0.0
17875487	0.173702554422	2.94798964635		16.3324685644	0.0	0.221474358974	0.0		0.14483837146087578	8.471361469569999	0.0	32.646107011670004	0.36893449892310537	0.0
17877685	0.028870936288099995	0.0		0.082872900548	0.0	0.0	0.0		0.028870936288099995	0.0017862329441419996	0.0	0.11162439461996004	0.006439150032199434	0.0
17877657	0.0046688818752	0.00033232240821200003		0.225148431564	0.0	0.0013018714402000002	0.0		0.0046688818752	0.002409337459543	0.000207701505133	0.28199550092558	0.0064214292266782935	0.0009999836246262623
17875441	0.0716031085589	0.0		0.0346304744962	0.0	0.00600037502344	0.0		0.0716031085589	0.0102898745608	0.0	4.084493882016201	0.00717792554844634	0.0
24612142	0.0	0.0		0.00622406078037	0.0	0.0	0.0		0.0	0.0	0.0	0.13029033900237	0.002150537634413304	0.0
17875267	0.0	0.0		0.038175147929	0.0	0.0	0.0		0.0	0.03832942585	0.0	0.294538263900783	0.029082029082033486	0.0
17875307	0.00606623054732	0.0		0.0	0.0	0.00989648504152	0.0		0.005199248266039319	0.01514248922468	0.0	0.6847244346278709	0.008488786417939705	0.0
17875679	0.013631176032100002	0.0		0.388513141152	0.0	0.00504795557799	0.0		0.017659229808547144	0.00167282356415	0.0	3.7258073494341297	0.016030383742723302	0.0
17877581	0.0	0.00519690511283		0.563831623003	0.0	0.0068367078622100005	0.0		0.0047054909801177176	0.014641388152089999	0.0	0.7980277574460001	0.02489381783858404	0.0
17877637	0.024358578042200003	0.00250923534622		0.404858153015	0.0	0.0047821466525	0.0		0.024358578042200003	0.008294416838897	0.0	0.59500243147329	0.010134348062436608	0.0
17875605	0.054717963505300005	0.00611785525689		0.0111027743551	0.0	0.551020408163	0.0		0.0009213685936695276	1.71876995427494	0.0	20.536071333780093	0.07734386871303324	0.0
17877665	0.008935407012479999	0.0008712622729939999		0.258746358963	0.0	0.00254189418189	0.0		0.008935407012479999	0.009444483039254	0.0	0.3277154804933	0.02015125406853499	0.0
17877655	0.00851714870688	0.000290782107186		0.00137082993388	0.0	0.0536912751678	0.0		0.028266448676060575	0.003032441974942	0.000207701505133	0.06363865712415999	0.01556350626119356	0.001950057511994792
17876503	0.121543582233	0.0		0.0	0.0	0.0993150684932	0.0		0.121543582233	0.006440041674068001	0.0	0.015855102599758	0.12561147950858964	0.0
17875667	0.0217745338473	0.0		0.3951441060050001	0.0	0.0	0.0		0.0217745338473	0.00167282356415	0.0	4.120951455439132	0.014631071894835103	0.0
17875387	0.0881522657851	4.26900262482e-05		0.00032838481729400003	0.0	0.0534979423868	0.0		0.07413975242295992	0.01601706869908464	0.0	4.824087669222507	0.04040314737866172	0.0
17876505	0.8431129653389999	4.97106749756		6.05688815383	0.0	0.6552179656539999	0.0		0.6089083643297308	5.1466157193592	0.0	828.3348203455697	0.16407093292219682	0.0
17877883	0.0144434949983	0.0		0.0	0.0	0.005805515239479999	0.0		0.0144434949983	0.0	0.0	0.0	0.01382198498460541	0.0
17875717	0.0016084196281199998	0.0		0.000213822568185	0.0	0.0	0.0		0.0016084196281199998	0.2840152476855	0.0	10.316982316814883	0.05003718261977623	0.0
17865892	0.0	38.4692496085	39.5479210134	263.515350636	0.0	0.0916144434497	0.0	0.10837166264604713	0.0	137.32609470944422	101.7923580572842	943.994291483274	0.18355562784642626	0.1883454582199424
17866272	0.63571652414	0.026872301474200003	0.026872301474200003	0.026872301474200003	0.0	1.0	0.0	1.0000000000352771	0.01626127866297138	17.4184082017756	25.0684702814086	162.63481213069858	0.3158208955221973	0.3005633023765085
17865606	0.006270164607130001	506.74841027900004	166.88093892	2000.5994282	0.0	0.122746185853	0.0	0.07227354436455452	0.0053572310180210895	578.4950572871811	200.150245622994	3029.337520357991	0.1815902164268781	0.1243734505038869
24612176	0.0405706250545	0.0		0.00072573044622	0.0	0.0	0.0		0.0405706250545	1.64192408647e-05	0.0	0.006485600141553001	0.0009135548703908347	0.0
17875493	0.0113207736956	0.0147537572047		0.905538576262	0.0	0.012097461237000002	0.0		0.0113207736956	0.38045320465778	0.0	8.61308645706471	0.016977660972408787	0.0
17875559	0.0305398238356	0.0		0.01074803507	0.0	0.0	0.0		0.0305398238356	0.0008542909465636	0.0	0.05150443971744	0.020979307518944543	0.0
17875439	0.059486462592500004	0.0		0.000259424005662	0.0	0.0	0.0		0.06042447429119601	0.0005648218857458201	0.0	0.015535885706191003	0.02134842617417172	0.0
17875471	0.0287763936375	0.0		0.00826872969947	0.0	0.0	0.0		0.028776393637500005	0.0006469180900698999	0.0	0.02567312501603049	0.01612661266126249	0.0
17875589	0.018101320576099998	2.82320567497		55.2123781224	0.0	0.07943707839030001	0.0		0.010498380979765637	3.66789375811691	0.0	64.30066306343927	0.19791190367311806	0.0
17875347	0.00453222987047	0.0		0.0577307401691	0.0	0.0	0.0		0.002948834144860255	3.28384817294e-05	0.0	0.392495277760268	0.010016155088848212	0.0
24612168	0.0	0.0		0.0766588516999	0.0	0.0	0.0		0.0	0.00567843345925	0.0	2.2406152024599	0.001347254968001253	0.0
17865838	0.0	1.12824648246	1.0506541021200002	4.10643145791	0.0	0.635514018692	0.0	0.3212432596320852	0.0	54.23822484018601	53.095082635493	696.24096287168	0.13283874580062352	0.1126197257938672
17877767	0.0255423130913	0.0		0.0	0.0	0.0027839643652600005	0.0		0.0255423130913	0.0	0.0	0.09513041163339997	0.02039964019530329	0.0015231921104738614
17865902	0.0	0.0	0.0	0.0	0.0	0.5698924731180001	0.0	0.4964698449361759	0.0066066042032575725	131.99017188580999	91.66702868864999	961.170555358	0.14198990854622207	0.12840173892026507
17875733	0.0	0.0		0.0	0.0	0.0	0.0		0.0007871382932326585	8.38340552098	0.0	83.40387444728	0.16200870955315191	0.0
17875335	0.0710150877783	0.0		0.295751742669	0.0	0.0	0.0		0.0710150877783	0.0033124195179000003	0.0	0.7363035385494001	0.003988953666781528	0.0
17875673	0.00033846960202099993	0.0		0.0	0.0	0.00619933237959	0.0		0.00033846960202099993	0.026737293344900003	0.0	0.550965525268	0.051544324107663735	0.0
17877717	0.0131506951003	0.00128774933182		0.0858222619208	0.0	0.00357065570223	0.0		0.0131506951003	0.0022847165564570003	0.0	0.2455862596689	0.021602827177374603	0.0
24612170	0.0	0.0		0.06293597084	0.0	0.0	0.0		0.0	0.0	0.0	0.4552210823171999	0.007605633802819667	0.0
17866796	0.0008142379738619999	73.6312961056	71.9861616387	590.505911205	0.0	0.045078577336599986	0.0	0.05817591253622172	0.0009390033491830193	155.918791824871	130.583801319956	1446.3576046157211	0.08013749079305434	0.07144640627184573
17877697	0.0242171545178	0.0		0.100527528484	0.0	0.0	0.0		0.02169087232723209	0.0190669981712	0.0	0.374527354055	0.05191472562180891	0.0
17877711	0.00243859305173	0.0		0.114858932338	0.0	0.0	0.0		0.00243859305173	0.00178623294414	0.0	0.6380519872928	0.004192554427438674	0.0
17875229	0.00425842602081	0.0		0.0560012964124	0.0	0.0	0.0		0.00425842602081	0.07993462833107001	0.0	1.0696171110903998	0.011064394777588964	0.0
17865876	0.0	12.5757063548	13.2082197866	196.56974039099998	0.0	0.237890204521	0.0	0.2223964079901841	0.0	106.6524000648142	76.8923947605842	804.3245952102742	0.2840462143558434	0.27672342552410545
17866182	0.0	0.0	0.0	0.0	0.0	1.0	0.0	0.999999999984478	0.00626929507937974	71.74664700818101	33.269306702994	1028.7380921579902	0.4782102074110274	0.3869977734574547
17875389	0.0932361190219	0.0		0.0016681948718499998	0.0	0.0	0.0		0.11473082898976646	4.92577225941e-05	0.0	0.003694329194551	0.005076142131974139	0.0
24612164	0.08658882387869997	0.0		0.106943830149	0.0	0.0	0.0		0.08658882387869997	0.0	0.0	1.4588841962391998	0.0	0.0
17877571	0.0120413600528	0.0		0.0	0.0	0.0	0.0		0.0120413600528	0.0	0.0	0.0014611738136	0.0103556956325986	0.0
17875421	0.0566911004489	3.28384817294e-06		0.0008735036140019999	0.0	0.0012836970475	0.0		0.06851282043538226	0.0013266746618664405	0.0	3.680555812425213	0.03976253523528436	0.0
17875431	0.0399569418304	0.0		0.00118546919043	0.0	0.0	0.0		0.13101852320235854	0.00326789858990944	0.0	1.944540965222089	0.025625744934429942	0.0
17876159	0.0827726010621	0.0		0.0	0.0	0.00131032976632	0.0		0.0827726010621	0.010883664130229998	0.0	0.411078790727	0.045833083697783814	0.0
17877683	0.0	0.0		0.238524408494	0.0	0.0	0.0		0.0	0.00207701505133	0.0	0.494578824022	0.009623861298867338	0.0
17846454	0.0822863880353	0.0031523364014000004	0.0031523364014000004	0.00350628810702	0.0	0.131147540984	0.0	0.08817812925619484	0.014380933724442772	0.49656033338385	0.28767387667904004	41.34377499263467	0.1379167814827797	0.08217264044439661
17844114	0.0043018298237	0.0		0.0	0.0	0.0014156285390699995	0.0		0.0043018298237	3.916041363962	0.215759854764	6.364915715526003	0.01835338034011031	0.0007782411612304064
17864480	0.0152347123976	1.2349547604100002	1.1850185375700002	15.2748602005	0.0	0.0606238964097	0.0	0.05586855091049897	0.007604867711221514	1.2993577783929	1.2382210306863004	78.02287582135	0.02294104152329884	0.020795031275943687
17848766	0.0	0.0397998416447		0.881391059753	0.0	0.0309734513274	0.0		0.0	3.2363922675765	3.7942676635561	37.220044044818	0.06179913739984625	0.050456214835949816
17864594	0.0108608062508	1.28566479651	1.42583477954	8.56463731773	0.0	0.0425785320828	0.0	0.043046887163898685	0.005617807115547795	21.757925681009997	21.95229562064	56.65011227753001	0.049784561075657714	0.04952783577065183
17864856	0.00397950730007	0.470530297636	0.275632201025	2.1263456204900004	0.0	0.013883944464200002	0.0	0.013298572844936973	0.007313722733331016	4.992987197476	2.730497011015	20.78977440065	0.02290260366441574	0.01651664655612085
17864932	0.0238507444059	0.053638457699	0.0535653877596	1.4000284149700002	0.0	0.0246729767096	0.0	0.022077439293725243	0.0172130286014796	68.74051341836899	46.59075335333961	744.7798549519703	0.061521791476045175	0.05142910761013122
17845372	0.0725274386456	7.12190671638	5.43981454661	21.4073423163	0.0	0.231617647059	0.0	0.1497569705446031	0.00243398683671847	12.170801395222304	6.1966914352949605	37.815306373827	0.04857434754342415	0.016139048223868416
17847612	0.0	0.0392172634602	0.17647768557100002	10.6012219409	0.0	0.00299962504687	0.0	0.01264770024275283	0.0	1.012643416004237	1.0061047671488001	24.634484292196504	0.06645356662178062	0.06881064483779134
17844566	0.030960546560400006	0.126657298548	0.0365474041027	4.92561947533	0.0	0.0307209692249	0.0	0.012348226313553378	0.030960546560400006	2.114044498398	0.2805799253547	17.82314165033	0.05260973663206448	0.04317631862614516
17844300	0.000527893449012	0.172599786893	0.023013304919	1.85257104598	0.0	0.00982878883957	0.0	0.0011124662915800829	0.000527893449012	2.5054668001842	1.62978447531396	8.045639459048001	0.06060606060604085	0.034607256755473804
17846218	0.0006474111735580001	0.00334684937843	0.0	0.207118486534	0.0	0.0571454528936	0.0	0.01846597181412244	0.0005642165310651548	0.014093111050901	0.008751261149885	0.6071653519746011	0.0686028049747912	0.029147044362506338
17844350	0.0	0.0		0.0962211357546	0.0	0.0	0.0		0.0	8.2813780549949	6.21287771989496	26.2536366405556	0.02710000964412305	0.010774956239377164
17847870	0.00936123264382	0.0	0.0190144353546	5.37897249032	0.0	0.0	0.0	0.0035670465327981727	0.00936123264382	8.757315669903607	2.3784072035934	61.8543367612293	0.2074984820886071	0.0871420150014563
17845380	0.0	0.0		0.170398884045	0.0	0.0	0.0		0.0	9.270204068164901	6.4685383294699585	34.153806842861	0.03976486860304624	0.015613971921341162
17865070	0.0036697149218200002	29.324444010300002	35.8784177245	226.853163837	0.0	0.078914919852	0.0	0.04514280119548585	0.0040397888344092395	626.1471495506856	220.68901843117038	2870.9773001079225	0.1320845034465341	0.07383147727841481
17864498	0.0053699776149	0.0354683287442	0.0298680663109	55.93013032970001	0.0	0.00781087273485	0.0	0.0066228871558236145	0.0039385320794680856	0.064560523664173	0.0532024931163	69.64587102340002	0.011551577152603227	0.010240307805498495
17845738	0.0383836836204	0.0103224057893		0.049138821305	0.0	0.114713216958	0.0		0.00872228026943637	0.03145334555295	0.0	0.3730656491534	0.04045746962117764	0.0
17845592	0.004733536377090001	0.00563607085496		0.136883565516	0.0	0.004703292304609999	0.0		0.004733536377090001	3.33846328081846	0.0	8.430452999244	0.014836461728660112	0.0
17865262	0.24650567846299998	19.8508097203	11.812461479400001	100.927512364	0.0	0.459244532803	0.0	0.20332210425617908	0.3754467539950258	39.5105241581278	24.1648945059448	1275.3819741659847	0.07891930323497952	0.049384993723863325
17846732	0.0	0.0	0.00147783244029	0.310076115653	0.0	0.0	0.0	0.004652500884480636	0.0	0.07346095383389999	0.05199283221739	2.642640438629	0.04504664593514061	0.032286939335964306
17864752	0.07065238453339999	0.062496464001	0.020832154667	0.737394233962	0.0	0.08929261693080001	0.0	0.0412736468238926	0.023571746491985148	87.217011709501	43.474402912247	380.107965801462	0.043863461602775884	0.0204273271235254
17844352	0.0370787036834	0.036144576966800006	0.132530115545	0.879518039525	0.0	0.00849858356941	0.0	0.02396280675055874	0.0370787036834	2.5606995876887004	1.87183140148496	7.4126088884699985	0.12054120541204115	0.08002036934454601
17863652	0.0517155235831	60.3731977474	8.00708345883	109.088617109	0.0	0.227424130274	0.0	0.15108546124731168	0.04063535659324408	246.149991255223	109.586930478064	1573.3510585534898	0.3741472887518789	0.2866932071870497
17863680	0.213900838771	0.437524299603	0.211539808894	26.5730759464	0.0	0.698687350835	0.0	0.6514519962047527	0.0933632794879844	335.58025814802306	217.731586892034	2370.00404154649	0.3667716535434082	0.2818601879906861
17863584	0.030733194674400006	4.72155374382	4.16252005845	321.303780033	0.0	0.50178662583	0.0	0.40065768632062215	0.009789434349213998	116.04019762022	44.70023774257999	711.5490870057	0.3856745380611028	0.2974872021620836
17844104	0.004678451127409999	0.0		0.0	0.0	0.0	0.0		0.004678451127409999	0.183395876549	0.16181989107300002	2.22232650407	0.01824265975820468	0.010029491447217778
17844110	0.0	0.0		0.0	0.0	0.0006989341254590001	0.0		0.0	5.318480419929	3.0407214401040004	24.337921134229003	0.030110420339599236	0.025664945995602744
17863566	0.005463530138090001	25.2203620388	19.852107472300002	27.673621991999998	0.0	0.30761523046100003	0.0	0.2929926658443839	0.00351742893732914	27.997365466655	22.151461811403	39.02772894867	0.07262135922336344	0.06471192984328443
17863580	0.00439041022693	31.088808229899996	25.3158784267	376.204135286	0.0	0.165903062455	0.0	0.10818227432693184	0.005481537128852811	86.75580810272	62.00903271045	978.6646051827	0.381269592476698	0.2979658441817585
17864706	0.0182920917322	27.400977328499998	18.7987428755	370.572475597	0.0	0.0999582347209	0.0	0.05695139396729348	0.01179250537716681	56.66537137277	44.94215150161701	525.644875946	0.053863933273061236	0.045221103618959854
17865320	0.000601844250429	15.7382071604	7.760641672939999	82.30272728770001	0.0	0.0981425006931	0.0	0.05769826505133465	0.012378401030925856	29.264394044270002	26.143408626117	155.07240034900005	0.04371417185250928	0.04263814553759875
17864486	0.00390304263828	12.836377308800001	6.74907376128	24.663926384699998	0.0	0.0257268353901	0.0	0.013814877760170848	0.005260848868982371	72.38611651810001	49.73344353724	125.7025711221	0.03350656455141006	0.020682973593950885
17864756	0.006744695782529999	12.403633633	17.538868033299998	71.1139033142	0.0	0.034735315446000004	0.0	0.03922891719199557	0.004953201790171152	145.7001053589	157.1696174361	679.9838181304002	0.0882733812950328	0.08739363835345497
17863640	0.0314428056406	28.173156914299998	21.0200061956	237.39463821799998	0.0	0.313941620739	0.0	0.24544424245800145	0.04848276780160492	252.851534171423	117.52955795266399	913.49162871449	0.3836426029487756	0.3028574166519247
17846884	0.0	0.76259835466		2.1671500923400004	0.0	0.225352112676	0.0		0.0	1.8166018811161293	1.5498418500611302	19.30032000995	0.12285673799051774	0.052890068212505234
17845934	0.0	0.00101575068402		0.061986300410400014	0.0	0.00296956198961	0.0		0.0	9.286426968382779	7.03858763751	31.49288745248034	0.0313568376068248	0.012163605861095269
17864492	0.00582755961442	9.395185369419998	6.16090485454	31.4054261259	0.0	0.023046704495900003	0.0	0.013630122783078751	0.0039651039831037176	65.10820741402	45.76744568128	123.50898816799999	0.026321260759302058	0.015999172624382264
17845686	0.0	0.0		0.0	0.0	0.0	0.0		0.0	0.0	0.0	0.00937500037253	0.011357857263953823	0.0008850922505382785
17864870	0.100282360251	63.7798535001	41.6437160401	720.9623583580002	0.0	0.0806531014112	0.0	0.07058298690591157	0.0736912040078058	109.03409155179293	50.979007674181396	1337.3659860518005	0.051400960817519985	0.03344396746016804
17864648	0.0162148477169	0.0		0.0	0.0	0.0	0.0		0.0162148477169	0.0	0.0	0.0	0.0028937761552860325	0.0
17843880	0.00016667659589500005	0.022042831406		3.62460305751	0.0	0.0435233160622	0.0		0.00023724189666254598	0.09202882111999999	0.0	4.742174609799	0.04027902790283329	0.0
17844232	0.0	0.000841665823827		0.0280976624417	0.0	0.00422654268808	0.0		0.0	6.778295767932026	3.2554423214611	17.207249466581498	0.08635057471258796	0.05935703790938701
17847736	0.0	0.11765179037999995	0.0833366848528	9.42016571388	0.0	0.015503875969	0.0	0.013211008953108084	0.0	0.1920630939561414	0.1783537036244644	15.050404732934885	0.05011933174223245	0.07511887591268274
17866976	0.00455055704251	3.6744801543	32.934341161599995	435.187624962	0.0	0.07914410930650001	0.0	0.0860090658459964	0.013919469261524242	120.75940546496169	78.46534821579233	1341.0933886573675	0.1039798748629358	0.05858114570801224
17864732	0.0	98.0488669043	43.5354915753	158.152601091	0.0	0.171002778479	0.0	0.06608359653598775	0.0	141.1880513932	70.09487612374001	611.0278039757	0.11858431080063715	0.059585359251014214
17846396	0.0	0.000321774277836	4.82661416754e-05	0.0377602115041	0.0	0.00723327305606	0.0	0.0012632313989368392	0.0	0.300653306025192	0.2414158207979584	22.40533892205764	0.0674869046169316	0.04012983549586888
17843866	0.000267603309994	0.0		0.00920748087992	0.0	0.00232603217678	0.0		0.000267603309994	0.09202882111999999	0.0	4.75138209067892	0.029690119517634606	0.0
17864560	0.00210268027487	60.0921964343	57.526089228900005	676.454370089	0.0	0.041280027751300005	0.0	0.02470779569549134	0.001754668276850917	214.2931169343	163.5995290559	3504.848029879	0.07850905562733386	0.03926495367759097
17843934	0.0046643591129	0.0		0.0	0.0	0.0	0.0		0.008058167647913127	0.11866792012	0.0	0.151031898335	0.03196527229674686	0.0
17847466	0.0	0.008080086670819999	0.008080086670819999	0.008080086670819999	0.0	1.0	0.0	0.9999999999456728	0.0009332208016273863	17.22656097167782	12.89661152661292	113.09519936818384	0.20496894409916167	0.11375258723874285
17864796	0.00430649145562	119.85320897700001	124.17591995	578.6671323730001	0.0	0.169630964507	0.0	0.15674175548255442	0.005973340111797721	359.6915827930416	360.5616536107216	1287.6857330483515	0.1439879966888428	0.14024128385541418
17843834	0.0397655606336	0.0		0.0	0.0	0.00414250207125	0.0		0.0397655606336	0.297327706689	0.0	1.3294154261799995	0.04974118981778479	0.0
17865094	0.014750945384599999	0.0292710294889		0.430827276039	0.0	0.00739411732724	0.0		0.011813409759134526	0.1241640444205	0.07154754520170001	2.302870929259	0.010072125313744656	0.003990514156211906
17846106	0.0	0.000321812440234		0.263564388551	0.0	0.0269421487603	0.0		0.0	0.005281103403834001	0.004524895688520001	0.389870758102	0.05237672504232027	0.010362283701106279
17864794	0.0	0.0782450007973	0.0677016320697	0.875713212561	0.0	0.055134041477	0.0	0.04508325077013922	0.0	4.4204315119783	1.1513068158527	22.147386393972997	0.044686721852085866	0.028020678571186487
17864850	0.0283753900618	0.137855505105	0.130592225352	1.48537019482	0.0	0.0365548322484	0.0	0.023713934926113702	0.014393126789062568	2.510405893671	0.568924588617	10.98328447687	0.02422641509432495	0.018735907964703483
17865086	0.0161463206122	0.0704470136552	0.0231737662107	0.371927503467	0.0	0.0564784053156	0.0	0.009500430089962602	0.004567418292682614	22.182333787875198	3.6962798745327	68.28149343918368	0.05677305486101133	0.014889157710685169
17845918	0.0	0.0330422460684		2.5119562064500003	0.0	0.0043885660064	0.0		0.0	8.7897851380374	3.1378482170407005	26.644979527738	0.04346712758454509	0.015340369929626946
17865082	0.0	20.3663382903	2.9275862053	48.6319360761	0.0	0.0796777081468	0.0	0.06070665861989469	0.003977487302446569	41.00045375852	38.34371348700199	706.0581588154399	0.0847251746127797	0.05934922670656813
17847778	0.00463821765907	0.031690725591	0.14155190764	7.59098513657	0.0	0.00790837196618	0.0	0.02154095262814009	0.00463821765907	9.312678327547	2.8291736966945003	65.62947713892129	0.18845396356471394	0.09221865887899523
17845540	0.0	0.00422705314122		0.267713365611	0.0	0.00126475548061	0.0		0.0	3.33705426310472	0.0	8.561282799339	0.02162587240733483	0.0
17846314	0.000475071550349	0.0017697585281	0.000836613122374	0.0121791564161	0.0	0.0700116686114	0.0	0.0315284591513916	0.0003886742898798024	0.42065103225477096	0.5119390595654649	28.18576283148662	0.08237196765505246	0.0541018816975904
17846552	0.0	4.82661416754e-05	4.82661416754e-05	0.008655728073790002	0.0	0.00215053763441	0.0	0.0026181582866724924	0.0	0.0659961893106754	0.0448875306174054	1.11797856405339	0.07088951072666018	0.050934482470879325
17845414	0.07714934880060001	0.0112721417099	0.00563607085496	0.100040257676	0.0	0.112676056338	0.0	0.06938758757714936	0.017309741631518258	4.556281757660299	0.26129668042996	14.381726368528	0.028803367408308963	0.004439171657122693
17864544	0.0	0.0	0.0	0.0	0.0	0.188679245283	0.0	0.19389647509757504	0.0	1.737307529014	1.877469725455	19.003856816029998	0.0363927894660023	0.03599417688638973
17863554	0.0556865471305	6.070807757790001	6.17392915767	10.3925542984	0.0	0.903448275862	0.0	0.9153109988542988	0.0016429768259038744	75.274629760907	94.37122517729601	413.85845363958	0.09625932697544916	0.09836984240201664
17864778	0.005810563142209999	2.1925582251900004	0.274459761684	14.3380262361	0.0	0.0272822665268	0.0	0.017345435715032897	0.0043177128066480535	19.612654794081	5.927249740463001	120.73786263191201	0.03857077064784944	0.020325000709053603
17865270	0.0015021913839400002	33.4911539955	28.5934792969	56.1459311472	0.0	0.050290797126199986	0.0	0.037756426248242624	0.0011479145199670012	79.12734456889999	54.83974113399999	155.4646186768	0.04414026453396065	0.027182955980214425
17847312	0.0	0.0042254300788		4.26345894951	0.0	0.0009004952724	0.0		0.0	1.0267795091488001	0.0	13.0079864976	0.0747232472322748	0.0
17846866	0.0	0.008478057614410001		0.163236252163	0.0	0.0122230710466	0.0		0.0	0.15487184603991	0.16440909524725	1.340412425212	0.07373821739638761	0.013108978678333705
17846292	0.0007756786869030001	0.0	0.0	0.0	0.0	0.00643573727049	0.0	0.00680280599771974	0.0007756786869030001	0.310455226412156	0.25078334590984297	22.39129318099775	0.0629452610695484	0.04041529361416714
17846676	0.0	0.0237198816903	0.0132277658267	0.07174494562789999	0.0	0.0682196339434	0.0	0.0391037491598127	0.017177161517272378	0.544945300643612	0.8857736378264041	53.54720022367344	0.1256804733726991	0.10047514588674944
17864920	0.022402545582900002	0.0		0.006172440320369999	0.0	0.0	0.0		0.022402545582900002	3.76941266298	0.0	5.18294054658037	0.015339663988271225	0.0
17846588	0.00043102932021499995	0.00654484354891	0.00163621088723	0.0509302667342	0.0	0.00305966343702	0.0	0.0023601947031433967	0.00043102932021499995	0.6134112889119621	0.8530126097025941	93.00084511746608	0.08087597571550613	0.05583060079417504
17849394	0.0	0.000189065214727		0.593914270166	0.0	0.000363108206245	0.0		0.0	4.134861753344727	0.0	25.835353463556	0.033950762016380656	0.0
17863612	0.08400308548810001	22.7722892147	11.5106280297	43.7620516457	0.0	0.94358974359	0.0	0.7784003013228518	0.056426004957941686	111.756168176003	40.749257493024004	416.81838291910003	0.4073103247415879	0.3259664519326483
17846348	0.0	8.044356945899999e-05	0.0	0.723305953288	0.0	0.0199684708355	0.0	0.01180215695432176	0.0	0.31053566998161497	0.25078334590984297	23.11459913428575	0.06756404689536198	0.04165041084270682
17847482	0.0	0.143664622679		10.6670982339	0.0	0.0124633431085	0.0		0.0	2.111693829768	0.21052995696620005	64.58345043093	0.06492703438040033	0.011732106259774241
17864746	0.0167740323426	22.3465627456	3.33812660116	138.355747566	0.0	0.0422134387352	0.0	0.001577606670945701	0.071751588683959	45.254238051692894	9.3352916340814	616.4036276937999	0.03643537757629209	0.014443406279597903
17866678	0.0157724314406	15.21408683	1.73626621708	204.567128651	0.0	0.11690647482	0.0	0.0737485671095267	0.020683290310762333	72.056175160676	76.80280594017202	1154.575477418445	0.08672913488773341	0.06269830781876846
17847970	0.0	0.107847474515	0.112749632448	13.3740120702	0.0	0.0061099796334	0.0	0.006797913737686112	0.0	1.26793080902231	1.62113211506331	184.05586398206745	0.054531085353007366	0.06665654733925674
17845784	0.0	0.0		0.0	0.0	0.02098401643	0.0		0.0	0.942227758467	0.0	6.712204645386	0.03423710056712854	0.0
17845776	0.0135437019156	0.0		0.137518051917	0.0	0.000429553264605	0.0		0.0135437019156	0.01712885974845	0.0	0.3990004060977	0.02251125562780724	0.0
17845820	0.0	0.00435668215505		0.210393643807	0.0	0.0149377593361	0.0		0.0005617583447960758	9.30254007744721	7.03858763751	31.69238350625064	0.03947368421050988	0.011984352722089654
17845730	0.00185975005372	0.00238948618062		0.0292712057126	0.0	0.00432525951557	0.0		0.00185975005372	0.03384283173357	0.0	0.402336854866	0.035333087964683665	0.0
17846280	0.0	0.0049592909636	0.004524895688520001	0.126306369551	0.0	0.113381674357	0.0	0.06725016212848474	0.0	0.305065580716471	0.245731563205885	22.4935793945406	0.09968308844712727	0.0602022426061813
17846078	0.0	0.0		0.00759477358952	0.0	0.0	0.0		0.0	0.00334684937843	0.0	0.21471326012352	0.049802058590645695	0.016093028642758963
17845782	0.000326349403645	0.0		1.0590985443	0.0	0.00048828125	0.0		0.000326349403645	0.942227758467	0.0	7.771303189686002	0.049180327868847636	0.0
17866670	0.0	0.0		0.0134135060653	0.0	0.0124223602484	0.0		0.0	0.106158602254906	0.0566459612164	36.914723698384364	0.005965648354534686	0.005106357006210829
17864646	0.0048773355132600005	0.7301569543780001	0.712720133364	42.0032672491	0.0	0.0675396278429	0.0	0.026026340470364482	0.0025740186825243764	22.475161147292	15.303121292500999	103.37220557476101	0.05452518495996589	0.02630866282160222
17865288	0.00174470327028	0.0		0.0	0.0	0.00829646017699	0.0		0.0018732889351928785	60.0921964343	57.526089228900005	676.454370089	0.017862577548875515	0.006669919048688063
17846592	0.0	0.0023489522282	0.00170540367253	0.016410488169599998	0.0	0.109036594473	0.0	0.07867866898767298	0.0	0.065947923169	0.04483926447573002	1.1093228359796	0.08011155991532043	0.057416620597150574
17864744	0.0257973711484	22.888915844099998	5.98548461319	416.26269624599996	0.0	0.06613720388880001	0.0	0.0313206460023649	0.058751757158463674	22.907675306092898	5.9971650329214	484.47371969489006	0.025345337937823908	0.01727901678397056
17864640	0.012991127262899999	0.0		0.0	0.0	0.00485703094399	0.0		0.010180377618636624	0.0	0.0	0.0	0.005589850775290364	0.0
17844866	0.0	0.0		0.0443796277395	0.0	0.0	0.0		0.0	5.366385575542028	2.3922394264811	15.182821827781002	0.05381224066391302	0.042447866441107374
17865404	0.0	0.0		0.006788576836699999	0.0	0.0796460176991	0.0		0.004439727155126699	37.325973604219996	5.409372325402	272.47669458671663	0.07908341483858007	0.035862695005630794
17866676	0.0144865695566	1.62485883106	0.383450944442	14.534359079300001	0.0	0.0670220868241	0.0	0.004508024385245586	0.005150478672014203	44.356589981436	41.307839160114	942.2566726607448	0.08510293402493536	0.05608296457521035
17864802	0.052661951526800005	13.4432627489	15.4548294528	30.2027824432	0.0	0.411201179071	0.0	0.4140649653352931	0.008953684041780855	252.5729529196616	271.5790526085216	1005.5364934407517	0.11844426152401576	0.11975308657785015
17865358	0.00272832448664	0.105696067563	0.0566459612164	36.8966848454	0.0	0.005916964712479999	0.0	0.005135224549485933	0.0026624930825166703	87.3480543083182	41.506941188327104	432.088512329867	0.01262277470841624	0.007448366135339205
17843802	0.0049723194965	0.0		0.0	0.0	0.00131233595801	0.0		0.0049723194965	0.297327706689	0.0	1.3294154261799995	0.055123345967170896	0.0
17843942	0.00439067007059	0.0		0.0	0.0	0.00436287046788	0.0		0.00439067007059	0.08776144064899699	0.0	0.551881704152	0.0198461920119118	0.0
17864588	0.0196792589621	0.0		0.0	0.0	0.0377673796791	0.0		0.012824067888064542	0.0	0.0	0.0	0.0110580028420019	0.0
17864738	0.0115630636739	15.2704682829	4.84364455668	99.4661894505	0.0	0.034158190375	0.0	0.015360448030849091	0.02126194528442766	93.05319751709999	46.8165379712	389.3863686422	0.041870581837983145	0.01965787265295925
17845568	0.0	0.0140901771374		0.14231078908800002	0.0	0.0274725274725	0.0		0.0	3.3781608074379	0.0	8.771820994799	0.031243124312413488	0.0
17845886	0.0137074986175	0.467788391048		2.08511676453	0.0	0.111506524318	0.0		0.0043478193049660335	5.2903841159794	1.9553549018993004	15.541335061830999	0.10315361139365598	0.032887494096145345
17846920	0.0	0.018220658123	0.029111166426400006	1.30853645923	0.0	0.0136235515189	0.0	0.021424300133937545	0.0	0.45050465577508003	0.14035071904065002	17.82496366744392	0.05879702635722491	0.035200664250224764
17844182	0.010801197325600002	0.0		0.0	0.0	0.0	0.0		0.010801197325600002	0.3157223798333	0.276886415668	2.9982231041680003	0.029795686719631058	0.024481812234078457
17843828	0.0194431455789	0.0		0.0	0.0	0.011926947446899998	0.0		0.0194431455789	0.297327706689	0.0	1.3294154261799995	0.05104677355242433	0.0
17845650	0.00207243241351	0.0677234943432		0.07033948252500001	0.0	0.048543689320400006	0.0		0.0011004374212466284	11.0490464144432	2.87294819579	25.922300162125	0.05530842230132512	0.022568339269188803
17848656	0.0	0.0		0.15511514555	0.0	0.0	0.0		0.0	0.0739964624227	0.05247513952781002	1.431750588379	0.06340312592156372	0.04658041448002025
17846684	0.0	0.00120665354189	0.00191455695312	0.0308092132909	0.0	0.046441495778	0.0	0.07125976879542012	0.0	0.49251855554720203	0.360499783651824	47.27087260507643	0.15983606557364058	0.14322171750662227
17846542	0.0	0.0016571375308599998	0.00207544409204	0.213615426212	0.0	0.0152547393365	0.0	0.0191584319005544	0.0	0.06760506069986	0.04691470856776999	1.3229382621916002	0.0545772594751924	0.0423542713213828
17845916	0.0	0.0103847059072		1.2722506771200002	0.0	0.00191370911621	0.0		0.0	8.7671275978762	3.1378482170407005	25.405273998408003	0.05047147936297693	0.0185215580979056
17845576	0.0	0.0648148148321		1.84722222271	0.0	0.0203629924745	0.0		0.0	3.7280837638565	0.0	9.602122470932	0.02427582971736591	0.0
17864524	0.07945323890650001	154.2009205	106.073439827	2828.39365979	0.0	0.111018553578	0.0	0.05197669837214537	0.07771366449038307	173.844545920092	118.40978383580901	4002.8320325742493	0.08031532046146693	0.044609855738942536
17847700	0.0	0.07394502637910001	0.048592445906300005	10.72414154	0.0	0.006983511154220001	0.0	0.004850303281827459	0.0	14.935480831654804	3.4624843595102	106.72196089014128	0.12936665719965876	0.05906953273206837
17864726	0.00930136920923	71.8840469626	38.6099262009	279.904382117	0.0	0.044593639576	0.0	0.02133344981625104	0.008686844057197845	112.24758829689293	52.4959096795514	460.2456495365	0.03338093057091949	0.01735936060240726
17864708	0.21068073559	5.8986822715999985	3.36296721362	10.0157970747	0.0	0.283524904215	0.0	0.14573011445794162	0.012948584157906774	40.3635413342929	13.885983478651399	180.3412674195	0.026472765271930092	0.01491091882177028
17849066	0.313826545676	0.226354039391	0.0413793101907	0.433042244578	0.0	0.383838383838	0.0	0.053677383677326135	0.0026076271361488755	47.250845771601	21.9332775715807	114.635254366078	0.09369847300870064	0.04538716364738836
17844560	0.0105110127978	0.0		0.0	0.0	0.00236406619385	0.0		0.0105110127978	1.4455910269130001	0.0	2.071294605732	0.03158656892027361	0.0
17865078	0.20897270190900002	0.847680713516	0.916428752709	0.966040544445	0.0	0.348837209302	0.0	0.2365900019586177	0.014821813425466302	117.08492531066167	45.531007054192344	905.9057636953676	0.11226772195459224	0.0494282807548773
17865066	0.00549574125581	8.224647590660004	0.497202691273	83.113986155	0.0	0.0718954248366	0.0	0.050424402971343166	0.009135462297455314	116.23724459714569	44.61457830148336	904.9397231509226	0.11138934461619844	0.04873335337280658
17846632	0.0	0.0006717420183119997	0.000134348403662	0.10747872293	0.0	0.00625	0.0	0.0008667087202637307	0.0	0.056426329538212014	0.045544108841562	1.3683234541679998	0.04912854030502668	0.039259029525969664
17846212	0.0	0.0	0.0	0.0	0.0	0.0650912106136	0.0	0.005468607253626981	0.0	0.010746261672471	0.008751261149885	0.40004686544060103	0.08082391133987406	0.029521138723507968
17843860	0.00264644239933	0.07271222472630001		0.0756106833633	0.0	0.0403945514326	0.0		0.00264644239933	0.26155785077230004	0.0	10.558207562892301	0.04541190368646636	0.0
17864626	0.0103936557289	20.4722608845	20.5264608411	48.085474959799996	0.0	0.053642595249500005	0.0	0.05299766932649121	0.00950786013966963	24.376166155542002	23.953199446343003	77.82902539111	0.03493438719154554	0.028552226219884982
17845684	0.0	0.0		1.50342190056	0.0	0.0	0.0		0.0	3.30489188632336	0.0	8.792956260508001	0.02562686402297036	0.0
17846076	0.0	0.0		0.028963119621	0.0	0.0	0.0		0.0	0.00334684937843	0.0	0.236081606155	0.041124550506692066	0.01328898017378527
17844564	0.0005162840661680001	0.0		0.0	0.0	0.00328407224959	0.0		0.0005162840661680001	0.0	0.0	0.0	0.011723570547094516	0.0
17865326	0.0006263915557540001	0.0187594619929	0.0116804197314	61.7851838818	0.0	0.011574301128	0.0	0.010335677081889014	0.010594737568375086	0.0187594619929	0.0116804197314	68.21102344889	0.013490389589701087	0.013198232901526613
17846820	0.0	0.000209432851989	0.000209432851989	0.381586656324	0.0	0.0005361930294909999	0.0	0.000521125885300754	0.0	0.212509397533739	0.216483587224439	1.13585856597609	0.0960486322188754	0.0970887211472264
17847060	0.0	1.00724300928	0.8867582846430001	10.248563669600001	0.0	0.303703703704	0.0	0.2680131560800925	0.0	4.1269932346769	4.5202350203740975	45.730487303739004	0.08660269646539398	0.09747582747837764
17845906	0.000612427197989	0.00600138465234		1.09515539878	0.0	0.00359712230216	0.0		0.000612427197989	9.29064319406234	7.03858763751	32.523938471879994	0.025051759834358932	0.009428683301022915
17846876	0.0	0.005786610752689999		0.10658007118	0.0	0.0751282051282	0.0		0.0	0.91987771149382	0.00495049497113	14.456866636220006	0.10317697440487404	0.017273570893196522
17844236	0.0	0.0108349997172	0.013669999520100002	0.037530942972800005	0.0	0.0625	0.0	0.0928556688777914	0.0	7.4730947610822	3.2554423214611	18.279831210239802	0.11210170051176054	0.06820620502713116
17865308	0.00249002700799	0.0		0.241092242359	0.0	0.00839385790757	0.0		0.0021799926221106733	22.475161147292	15.303121292500999	103.61329781712	0.017560111160338742	0.005227507673703111
17849400	0.0	0.0		0.283901198824	0.0	0.00365665896844	0.0		0.0	2.91788655537872	0.0	16.683048967621	0.03743340282602379	0.0
17865058	0.0111832648821	14.7708358619	4.84014939301	203.88753326900002	0.0	0.0893909626719	0.0	0.046731266500347465	0.0035446576010853023	122.93418194768569	47.06811356968035	926.8011651799228	0.1324237560192801	0.06032370242432205
17846102	0.0	0.0		0.124348326906	0.0	0.00234810683886	0.0		0.0	0.0049592909636	0.004524895688520001	0.250654696457	0.050677061961384016	0.013171836001272865
17843790	0.011038476392999999	0.0		0.0	0.0	0.015310462149100004	0.0		0.011038476392999999	0.0	0.0	0.0	0.057137787241641376	0.0
17864670	0.006001978593479999	5.482840774	8.5649377479	114.400353579	0.0	0.03199760018	0.0	0.029772998572352737	0.005589634252339257	19.009027657870003	26.947704701076997	187.1700266403	0.034078560354713086	0.034394287862869605
17864948	0.0	0.0339298881445	0.0287309832202	0.42294591479	0.0	0.0151682294539	0.0	0.01321043455305887	0.0012982966866388705	4.9945898064135	4.9757682964598	24.240442508759998	0.036989483981427575	0.0286834247193318
17864874	0.0026516954838	0.8786880408299999	1.93554253218	4.2513003620699985	0.0	0.0261878039656	0.0	0.01860038914286038	0.005393712411758853	5.338673521241001	4.342934247217	17.648492006239994	0.02714260260140413	0.02120151220329027
17864866	0.0181811641231	1.9495795867400003	1.83846712642	2.4139071673	0.0	0.0722100656455	0.0	0.06455168518119403	0.006608744364848285	4.459985480411	2.4073917150370003	13.39719164417	0.027322790172253083	0.02169239062326549
17845708	0.000907405176326	0.00422705314122		4.30336905857	0.0	0.000459911083857	0.0		0.000907405176326	0.12399355880887995	0.0	7.101678238058001	0.00906562274647224	0.0
17864824	0.0017799174111099996	39.9381454623	39.078762454	195.456869367	0.0	0.235543018336	0.0	0.20942026267086286	0.00101730843541164	264.33186826854	275.958146687	1002.9891490485301	0.11198620976615004	0.1127601722466986
17845948	7.98986057477e-06	0.150106203568		2.27292429211	0.0	0.0468335787923	0.0		2.2937237148100917e-06	47.400951975169	21.9332775715807	116.908178658188	0.08452490774897506	0.0365028566488365
17864636	0.0033873214615700005	1.0588607800299998	0.166915323876	4.33219217422	0.0	0.0317442385901	0.0	0.0017474365772386276	0.0024420788459965023	26.992655693964	18.327811297832998	70.495670728681	0.041957705091746435	0.01650486826136118
17845622	0.0	0.00140901771374		0.711553945439	0.0	0.0003724394785849999	0.0		0.0	3.36547964801424	0.0	9.34106415115	0.024099553062820904	0.0
17845454	0.0379267802234	0.0283414981677		1.17892948509	0.0	0.034155233618	0.0		0.02288343831648941	9.2985455663326	6.4685383294699585	35.1736095856159	0.03932077977519626	0.008567207095103856
17864440	0.09352859063480001	0.0160890177358	0.0160890177358	0.0160890177358	0.0	1.0	0.0	0.9999999999417925	0.2457491152195371	19.6597144378278	12.3524330265448	1174.4544618019847	0.04962095106824178	0.03752644918021453
17864612	0.0120628888005	0.0030466113239499995		6.26687949337	0.0	0.00419357232984	0.0		0.0120628888005	0.0030466113239499995	0.0	6.26687949337	0.008240544698474545	0.0
17864458	0.0177820106702	16.673094473499994	10.1269027105	33.59900908	0.0	0.05960591133	0.0	0.03637278811543637	0.008174517883255123	45.63619057339999	26.2462618371	99.31868752959998	0.04235690903677628	0.024117163539638456
17845910	0.0	0.012772177593399998		0.0510887103737	0.0	0.0608865075499	0.0		0.0	9.29818339529216	7.03858763751	31.481989862443644	0.045238869028253886	0.01480030560414062
17846636	0.0	0.0	3.21774277836e-05	0.0320648067864	0.0	0.0	0.0	0.0004459778437291004	0.0	0.3867299454283421	0.2718280241823376	41.89150134391309	0.06743881935357034	0.06183993600027229
17844870	0.000387234915888	0.0		0.00969374600754	0.0	0.004648460197560001	0.0		0.00038723491588800007	0.000673332659061	0.0	2.39581635656054	0.03491130699748846	0.0
17844036	0.000562784632847	0.0755159491673		0.140243905596	0.0	0.00168747890651	0.0		0.000562784632847	3.8297374220563	0.215759854764	6.3109757518350005	0.03614279366020458	0.001667610226390025
17845718	0.0013410612697499998	0.00422705314122		3.58509973697	0.0	0.000534664052754	0.0		0.0013410612697499998	11.462620198614822	2.87294819579	30.95826372538701	0.033291544783410426	0.010600423459493613
17865402	0.0	0.12068965285999995	0.36206895858	3.13711004704	0.0	0.151515151515	0.0	0.27326125005763113	0.0039711735268450135	20.63411546822	35.416127281701996	657.4262227393399	0.0853686372973836	0.05917617815062363
17864482	0.0009361453434039999	9.3854907403	4.26398776856	11.2937045102	0.0	0.020245398773	0.0	0.01067895326556481	0.0024028743235303732	88.51283530919999	59.10372890255999	166.758323187	0.037610372191773454	0.022672808820572283
17845688	0.0	0.0		0.0	0.0	0.0	0.0		0.0	0.0	0.0	0.00937500037253	0.014579479926028418	0.0011361460528615613
17863696	0.06976207210039999	159.754925406	84.5629736402	535.947442348	0.0	0.552218614719	0.0	0.4339653909110017	0.08453369192674752	442.98069284430005	309.3067372368	2723.762780676	0.32068561382965305	0.2451724917604292
17863684	0.124998525791	4.11272980412	3.7279548491400014	4.48785509309	0.0	0.950819672131	0.0	0.8376639607580002	0.11263246026343335	335.14273384842005	217.52004708313999	2343.4309656000896	0.34332321699557866	0.2557500939691563
17863764	0.0633653113759	138.58343991700002	104.216705603	490.92959725599997	0.0	0.563330621101	0.0	0.4784354347785901	0.05087049787007341	1082.2103126600678	541.9199054792497	5810.551389028055	0.3295628608461663	0.2559447633111393
17844868	0.0	0.0		0.363187499839	0.0	0.0	0.0		0.0	5.36661109894873	2.3922394264811	15.5452382051484	0.040203904972597966	0.03148580802095028
17865272	0.00200083378153	28.963096099899996	16.1193591266	65.7196784496	0.0	0.0380077009067	0.0	0.02102699860498813	0.005178672198750524	761.4423839819	336.5558395274	5386.0829112096	0.08634366609697891	0.04301995617307067
17845926	0.0	0.0	0.0	0.0	0.0	0.00383451059536	0.0	0.0030007892549804233	0.0	25.974810159878	12.078903753214801	67.826106761557	0.05991621651416041	0.029578976073322837
17849016	0.0	0.0	0.0	0.0	0.0	1.0	0.0	0.9999999999456728	0.0	9.566818835672402	11.8441970027053	114.846539778162	0.18467552775589646	0.16030124137687699
17849072	0.007636170046879998	0.00382103282027	0.0031935729784899995	0.26136516011300004	0.0	0.124137931034	0.0	0.08487577395375859	0.0025152582050872803	0.6441329725348209	0.6490895645992409	39.01216519372867	0.09245991129327158	0.06163801614625464
17845818	0.000432579783866	0.000307763315504		0.32422865288400005	0.0	0.0006184291898580001	0.0		0.000432579783866	9.298491158607664	7.03858763751	31.80621851532764	0.037488586927315486	0.012229588147575242
17843756	0.011950384575399998	0.0		0.0	0.0	0.0189507930053	0.0		0.011950384575399998	0.0	0.0	0.0	0.035319440367887395	0.0
17843776	0.029001172319999997	0.0		0.0	0.0	0.000237925291458	0.0		0.029001172319999997	0.0	0.0	0.0	0.044507402668651184	0.0
17843872	0.004848607680939999	0.0		0.0	0.0	0.0278302697131	0.0		0.004848607680939999	0.188845626046	0.0	10.482596879529	0.043409299607651566	0.0
17843868	0.00031069984190599994	0.0		5.87816211919e-05	0.0	0.00179791441927	0.0		0.00031069984190599994	0.09202882111999999	0.0	4.742233391420192	0.033637435611032294	0.0
17865264	0.00967862553293	4.80828993954	3.11127992347	549.168864096	0.0	0.0340091563113	0.0	0.024216487204274228	0.06633322613540138	19.643625420092	12.336344008808998	1174.438372784249	0.049256932740935296	0.03715779836408094
17864434	0.09897446472660001	520.329604141	221.856084338	3615.32212907	0.0	0.124700399467	0.0	0.062367202679708876	0.04700192417629194	558.0937343619757	244.3138068436258	4874.907089572736	0.10715400218419988	0.054927619631024285
17845382	0.0	0.291573142167	0.271846894175	1.4807840925600002	0.0	0.0182078559738	0.0	0.0014020652536177044	0.021617041082107408	12.417040939914902	6.4685383294699585	38.817838905316	0.03793679521091145	0.012572910147993496
17844148	0.00240171558483	0.0		0.0	0.0	0.0	0.0		0.00240171558483	0.298462401144	0.2509964476341	2.8141166648160003	0.02989928661350324	0.021375810422464687
17865304	0.0123917734537	0.276679885472	0.275489593303	2.15933471381	0.0	0.0311260904044	0.0	0.0253107466899138	0.010824055669865636	5.759520659471999	8.840427341203	116.55968829281	0.031900015539333	0.02927335157044313
17844058	0.0005605441539319999	0.0323639782146		0.0755159491673	0.0	0.000983929157101	0.0		0.0005605441539319999	5.1674485215946016	3.0407214401040004	24.230041206847304	0.03312277721745857	0.029363673548979324
17843710	0.0102196539113	0.000269806232609		0.021742433964400003	0.0	0.02570593963	0.0		0.0102196539113	0.000269806232609	0.0	0.021742433964400003	0.04086810991742038	0.0
17843874	0.039411943361699994	0.0		0.0	0.0	0.016913596433700002	0.0		0.039411943361699994	0.0	0.0	0.0	0.029798844425422417	0.0014428939073303946
17843950	0.0212825041448	0.0		0.0	0.0	0.0	0.0		0.0212825041448	1.4455910269130001	0.0	2.071294605732	0.03602631862797908	0.0
17864614	0.0350213267055	17.5010852646	11.8038958204	39.560834510700005	0.0	0.0630275745639	0.0	0.031773579660292595	0.013255143249344728	25.13722375513	17.398991211829998	65.34841608069999	0.048844052122740574	0.026916253749394502
17843780	0.0065865532575600004	0.0		0.0	0.0	0.000917852225792	0.0		0.0065865532575600004	0.297327706689	0.0	1.3294154261799995	0.05250801222331639	0.0
17844076	0.0051879298044	0.00304434586724		1.50235841419	0.0	0.00195601920455	0.0		0.0051879298044	0.14355507245604002	0.0834190880341	2.588578036009	0.012042803564680831	0.005388329362145005
17845988	1.52728733341e-05	0.359879039228		3.74801270943	0.0	0.0557586837294	0.0		0.003454695921471529	26.470836220431398	12.1354647361993	72.078478362401	0.07610272780032475	0.032746471359407864
17847484	0.0	0.0274652955122		9.9677895559	0.0	0.00267269736842	0.0		0.0	1.9954945026012	0.21052995696620005	63.88414175293	0.06271684013876913	0.012658901950431609
17864826	0.0	0.36895594353	0.36895594353	0.36895594353	0.0	1.0	0.0	1.0000000000253375	0.0	225.19341474043705	237.559802930826	811.7917297431102	0.09354283029705827	0.09416102199086404
17864566	0.0	0.0		0.0	0.0	0.07142857142860001	0.0		0.0	60.0921964343	57.526089228900005	676.454370089	0.04240754653979908	0.023783754250330632
17847074	0.0	0.0	0.0	0.182853130158	0.0	0.0196078431373	0.0	0.003021489209993188	0.0	1.679875086061	0.7071304437701	11.059387623575999	0.0677977936042299	0.040970780949550895
17864632	0.0035626584263999997	3.44734776951	2.02460057661	20.993041341199998	0.0	0.0426804123711	0.0	0.021012915591492296	0.003865403459416007	29.381142683444	20.185496550567	87.15651989566099	0.0475622128065784	0.025605352525787318
17864454	0.0389343817072	13.088941543399999	7.51789208502	609.472495025	0.0	0.046280739269900006	0.0	0.028680772546145664	0.011781212533991071	14.899738498534898	9.2782665784553	684.6236868676589	0.03130041949016996	0.024571183792310623
17847504	0.0	0.362291073194	0.739757233998	5.57328495546	0.0	0.0779392338177	0.0	0.1282663690750821	0.0	5.885587734986969	3.49189905770339	36.495705736159366	0.1442430431452381	0.14675679980728873
17843940	0.00659994725999	0.0		0.0	0.0	0.0034263338228099995	0.0		0.00659994725999	0.0019280857159170001	0.0	1.4381617979449999	0.018998468780120143	0.0
17864758	0.0	0.528303080238	0.419407909736	9.453208483760001	0.0	0.0398194850013	0.0	0.03467202062691426	0.0	102.93096004701799	46.23169110231101	184.61824647599	0.05655863758036644	0.028399031142508056
17864652	0.00277808369431	3.62722538557	3.15124901194	27.5842157175	0.0	0.025086821422	0.0	0.015284884487737887	0.0025743387350220205	9.386746045041999	11.991676353143001	144.14390401031	0.029672349135667807	0.024699632163323538
17844356	0.0670229015081	0.0	0.0028766631148800003	0.984158279825	0.0	0.0004914004913999999	0.0	0.00032736616828599435	0.0670229015081	2.3328670132912004	1.60964783350984	7.177226692893	0.09538029158612236	0.05946683183035777
17846300	0.0	0.00022524199448500004	0.00016088713891799998	0.00030568556394400004	0.0	0.736842105263	0.0	0.5277638181225289	0.0	0.300331531747356	0.24136755465628296	22.367578710553545	0.09808963997068068	0.05987012945766481
17846042	0.0012614949548	9.28464180941	7.03858763751	31.4287830731	0.0	0.04253080853619999	0.0	0.01711021203183825	0.001259224036789559	48.21503388154	26.016293949937	126.65735304441002	0.0615808157646724	0.027325361071462242
[truncated: 54,221 more rows]
