# Supplementary material
Source: publisher figshare collection journal article supplement (https://frontiersin.figshare.com/ndownloader/files/15085706)
Supplement: Supplementary file 1 [file 15085706 › supplemental_TX_12.csv]

COMID	wet_pct	fldpop_EA	fld_pop	dasy_pop	dasypopNA	fldpct_EA	fldpct_NA	fld_pct	wetpct_up	fldpopEAd	fld_popd	dasy_popd	EA_pct_d	fld_pct_d
5279082	0.0317089646796	10.0830212918	7.30548118748	1253.95717537	0.0	0.0591000250689	0.0	0.053790451835752	0.02785817152991818	10.9638214277028	8.2745872443416	1307.3955968281	0.08359883180664407	0.07596287653800905
5276196	0.00404152152764	0.00443859898951	0.0017754395958	10.238337916599999	0.0	0.0129701686122	0.0	0.009115929598288629	0.010876161623687786	0.94582363319951	0.9742208453828	26.928246207369998	0.3867624543632451	0.3999416833529351
5279828	0.0247242568327	0.0	0.0487534330459	113.097806156	0.0	0.0286802030457	0.0	0.049136893460675415	0.0247242568327	1.2446242059816999	5.7219638583489	714.6656961550999	0.07410509856487506	0.07595300493186673
5276520	0.14295924872000002	0.0	0.0012898617424100002	3.6422668410800014	0.0	0.020202020202	0.0	0.1727527710599506	0.04144387096419692	4.071853344521204	3.4716171458008342	56.41034872665293	0.11192246415305186	0.108869337145466
5279046	0.025731071180699998	1.72437988238	1.33829989975	32.1715993148	0.0	0.0590428837787	0.0	0.0594497887491619	0.02136425258282273	2.3810753125514	1.8649363590788002	61.596194994038	0.10258847207456392	0.08744143885203827
5278966	0.04506403520359999	0.366318822682		7.18777699876	0.0	0.250513347023	0.0		0.012990976210534692	10.606376951185483	0.0	237.44585690497001	0.3402397437225544	0.0
5279724	0.00666151498802	0.000126318964249		0.0896116489894	0.0	0.0655412115194	0.0		0.010773317741158469	1.258976034860758	0.0	9.004288751289044	0.4268259198245041	0.0
5275450	0.00140225744786	0.0		2.78792063184	0.0	0.00247729149463	0.0		0.00140225744786	1.37453753725447	1.664426781584939	52.184272837847786	0.07572950440028875	0.11186900983332347
5279498	0.384935107332	0.904858276161	1.06046927205	1.21770450982	0.0	0.720526315789	0.0	0.7455158595084272	0.29944403720050616	1.321699079912	1.477682286464	1.6349175242340002	0.8968852776162437	0.9064569933376572
5275268	0.07243480865100001	1.04681336491	2.84366664875	41.8386376805	0.0	0.0197918443952	0.0	0.039828216003934436	0.06400310209504885	8.111141359681758	15.309491292279699	268.82534862679995	0.17202078032237905	0.1931897962189631
5276080	0.0649512295281	0.0649216533493	0.0927206226042	75.7328134426	0.0	0.06395348837209999	0.0	0.08634657753576941	0.0649512295281	1.01037675595947	0.56707720621437	96.49058239049721	0.3957761351635722	0.3560520542166798
5276624	0.0185913995652	0.0		6.46096611221	0.0	0.0	0.0		0.0185913995652	0.94582363319951	0.9742208453828	33.38921231958	0.35796817091762745	0.3701662124863497
5278918	0.030686527979599997	9.279353249789999	16.8347750384	1256.65263821	0.0	0.0617950969136	0.0	0.09233314270327822	0.03740696362480184	39.364288187090004	39.6392689177	2045.580103271	0.08631133966700923	0.1050597399466612
5276128	0.0066008088423800005	0.0		5.49134926492	0.0	0.0	0.0		0.022617242999302786	2.44912612412819	1.6867322185354998	60.61176006727899	0.09368662971482547	0.1241153716994248
5279516	0.026021306619700004	4.1948914676	2.33943059843	363.520963896	0.0	0.0994803825589	0.0	0.08338135611521967	0.02204435094204325	120.43307234978407	171.61208627621798	3858.5951906605146	0.180658799479322	0.1810573318108072
5279750	0.109799629178	0.0		0.0	0.0	0.0207468879668	0.0		0.02247572758541086	0.0046764212093	0.340549716230719	4.4120235532899015	0.27506094937622005	0.17305567545621825
5279548	0.0537901518396	3.8916973636300014	4.40074564688	63.6721294354	0.0	0.169335142469	0.0	0.17927058910617716	0.034075946697995824	7.363043006375872	10.04180061226027	148.3457317640505	0.24460610068598065	0.2801176539150728
5279570	0.00824436901553	0.000393837825413	0.000405535978643	2.50090666134	0.0	0.0413486005089	0.0	0.039893903398385916	0.00824436901553	0.408934554635413	0.8875390165706429	71.92755727833999	0.13358305347464156	0.1568821308492861
5279010	0.0402311682665	0.0240491176955	0.0479249708296	15.5222051642	0.0	0.0133382734346	0.0	0.030163701092306705	0.0402311682665	3.9912339896476015	5.0579786805296	112.8210619672	0.08747658163977777	0.10302830036484237
5278916	0.00990017413658	0.29576170319		68.9096807633	0.0	0.0397923875433	0.0		0.00990017413658	1.6257187449363997	0.0	77.7505758651349	0.20204618532606453	0.0
5276542	0.0	0.0	0.0106526375748	0.14824920625	0.0	0.214750542299	0.0	0.32435703981304204	0.003364837631297839	0.8077556645743	0.7911380188311	1.7097013356403	0.6551433389544173	0.6547052823976022
5276098	0.0154369344633	0.0005940647497480001	0.00278753459497	0.0123382678794	0.0	0.0380116959064	0.0	0.17714480821693285	0.031008075602479236	0.389661616874778	0.54156313348319	6.536064532553071	0.43739180611635947	0.5234155285613558
5276350	0.0062034665676	0.0155420143274	0.549453925749	30.239576803400002	0.0	0.0345911949686	0.0	0.08352008674584707	0.01436914933074385	5.3481062266165775	8.95245413697065	141.1192804397274	0.1392652933347016	0.1698528383673517
5275612	0.026196508126699998	0.00117501089699	0.000538546661119	3.44374337638	0.0	0.0405604719764	0.0	0.03345129428993153	0.013696265533057462	2.40059378427699	23.11099916971512	215.47391317208	0.1857371474293092	0.2230619177525075
5275898	0.043650111971500004	0.0100492226629	0.418983122247	13.2483155798	0.0	0.107228915663	0.0	0.17778885911569509	0.05833598331622051	0.22474230620379	0.6120377903614901	21.123080074536688	0.5699687424864163	0.5544158283601116
5276622	0.00764504061336	29.6814358598	90.99658682319999	2842.66565532	0.0	0.0798796540053	0.0	0.09342399296254587	0.00764504061336	32.187959588507155	108.17737623751951	2936.561300120249	0.10427377057702276	0.12335459010023875
5280040	0.016112244650700002	0.0		92.3444509179	0.0	0.0	0.0		0.016112244650700002	16.937868885985	14.342782450241005	1438.3269755082058	0.08841578549819844	0.09261976780018356
5280078	0.024354882549999998	0.140445193785	0.177552573805	28.8575899447	0.0	0.182454251884	0.0	0.2379356869822203	0.013256831746985165	0.2862006189533	5.643595362478	1045.3995613997	0.10365011872547328	0.1572147483050971
5278806	0.00777865783593	155.415730871	273.796230643	5152.25098897	0.0	0.0732101383419	0.0	0.10636812821368442	0.006303233595845026	182.133197492	293.8863603871	7694.265389300002	0.08823529411762453	0.09167296246803128
5280104	0.022822964730799998	0.113801122483	0.0856170914922	148.654241848	0.0	0.0347316664923	0.0	0.03960334251833053	0.022822964730799998	0.2325895717805	0.21963462686110002	233.47660547240105	0.06557620817842884	0.07171277080732649
5275464	0.0352354098299	0.000487971308758	0.760391240743	9.875979672949999	0.0	0.0155440414508	0.0	0.18091867516675766	0.028757468359658662	4.555149393587059	3.5463774835696	45.74553843141	0.2458092689109021	0.2713381433718556
5275720	0.65904529657	0.0133662666485	0.014511946647	0.0148938399798	0.0	0.958974358974	0.0	0.9910957146901108	0.21786249722846185	0.4340687110745	0.436403805052	17.9472544157138	0.7868547512013602	0.7772759646461588
5275394	0.0337537197546	1.05911004759	1.7505410447499998	56.0151318391	0.0	0.0328108672936	0.0	0.039993308895258976	0.0337537197546	3.65453185515	7.221981257589999	118.81024591049999	0.20101137800260385	0.2528432993011193
5278822	0.00542175275394	0.044995856937	0.147198665887	149.85925735200001	0.0	0.00661000944287	0.0	0.021575195225129525	0.00542175275394	4.239887324537	2.486629264317	513.380221248	0.08155080213901501	0.07144904126666496
5276504	0.0324477336705	0.0298035739688	0.0341442229692	2.12103973125	0.0	0.187326549491	0.0	0.2046774557798648	0.032602569564651275	10.424402380683519	10.001909466316919	82.50283023162874	0.3580880367268921	0.3454135519482203
5275682	0.0	0.0		15.0467462832	0.0	0.0	0.0		0.0	2.0996247630361684	4.820814845859999	129.32216942655998	0.11803278688517067	0.10566502456698283
5276562	0.0492118582723	0.0		24.2750871442	0.0	0.00175746924429	0.0		0.049211858272300006	1.4341342458469999	1.580886496652	84.7088806088	0.13909090909091218	0.14372167209904607
5276348	0.101126595851	0.326405844571	0.400503553428	57.7271728388	0.0	0.1072910492	0.0	0.13165411548956565	0.08500570442767799	5.620451126373178	8.764595026159549	168.5540352601186	0.132969274294693	0.15973279267079954
5276062	0.028220586189000002	0.00856266937626	1.84143578928	76.2070353099	0.0	0.017403173519900002	0.0	0.04832875643240435	0.028220586189000002	2.48184133074472	3.548037336481148	143.33590374416804	0.07725654126031863	0.10584212254539543
5276130	0.025982338047799997	2.47838056917	2.05879630421	450.87028881699996	0.0	0.059029234858	0.0	0.059946806721781175	0.02633674399090291	8.09883169554318	10.823391330369553	619.4243240771186	0.10931626991251482	0.1278118147958429
5280000	0.052771468519099994	0.24360897117	0.22328803593	338.620927195	0.0	0.0827006507592	0.0	0.08176921375602787	0.03676336091405677	14.252021919344301	20.47841261950689	568.795520994094	0.16096481761284187	0.17017015132429394
5275232	0.0659512296301	3.13113124341	4.16524502564	62.913512950699996	0.0	0.173311635476	0.0	0.19009316984378205	0.040231462288777095	11.236934427780001	17.564866905955	264.9460784284	0.1726309550269014	0.1813222153044256
5280058	0.024010291866700003	4.1009690896	3.8460132266300007	232.05948572	0.0	0.0606151537884	0.0	0.07670711077194751	0.024010291866700003	6.0251775431942995	11.222121141979999	680.2960498558	0.11890951276084664	0.1581266523675231
5275288	0.0203485065777	0.000443234559498	0.00206842794432	11.5090932394	0.0	0.00224382946896	0.0	0.00931789242756166	0.0203485065777	8.155097641497997	12.67497406293032	155.39165516174998	0.1978091047861173	0.2217156970485365
5279098	0.0102969198947	0.638568577677	6.321674471900001	109.51753914	0.0	0.0674864169288	0.0	0.10314942844371984	0.0102969198947	6.3412485895324	10.513960452743401	202.0713401367814	0.17221318534107494	0.16580632391706202
5279706	0.0107994682739	0.0		0.42922113727	0.0	0.00225479143179	0.0		0.011365262475461702	1.2593650069436315	0.0	10.035435525972042	0.3335805084747527	0.0
5276102	0.00014847089653799995	0.0		15.118040613599998	0.0	0.0	0.0		0.00014847089653799995	0.7810283696165776	1.8581034282006497	49.4995577897526	0.1393302371059011	0.17132049718305842
5280044	0.0	0.000832445395645	0.00388474517968	0.865692781517	0.0	0.016	0.0	0.07018226223273118	0.025965179443395155	3.7271368086446452	8.36808493927968	138.644116869617	0.10239802606231646	0.1138168865417637
5276570	0.0588567275581	0.0		3.4818328710800004	0.0	0.0	0.0		0.0588567275581	4.554661422278301	2.78761281385579	49.38015991394	0.21158291762969766	0.2282050369808397
5276160	0.006611247154869999	0.00361008578693	0.0109673492261	18.455111057899998	0.0	0.0234143449911	0.0	0.07130728347968289	0.006611247154869999	0.39267763791196003	0.54974294811432	24.97883732257367	0.28429109464207697	0.35247777706727584
5276134	0.035878914168300004	0.0127048017457	0.0467355207074	8.57125382563	0.0	0.013176470588200002	0.0	0.05121550821963395	0.026751821967592102	1.8936854125692002	1.775107553156	202.82980670763573	0.08419221850035626	0.10342260851427246
5276208	0.00819180658587	0.0	0.561052031699	8.13424710929	0.0	0.0	0.0	0.033311058608215614	0.006630696097010687	1.8737504476338	4.069303042347561	210.58713685474342	0.08441623854161072	0.09035965629646676
5278770	0.0502369715261	0.124143322508	0.6248561298049999	549.936260984	0.0	0.088928985694	0.0	0.0943468223126824	0.0502369715261	36.367739842762	25.184710016792998	1140.0009901412	0.4237059801714405	0.442506647464936
5275692	0.0273048362731	0.000221658643568		7.83084544365	0.0	0.00373134328358	0.0		0.008518854623039349	2.0996247630361684	4.820814845859999	114.27542314336	0.5289136570892807	0.5074523354987143
5276616	0.0	0.0		27.5272863351	0.0	0.0	0.0		0.0	12.698635322149999	10.346288944274	278.5411840441	0.08755001176752404	0.08195350114446992
5278716	0.045632040663	1.67515200315	2.36291055628	69.0464417535	0.0	0.126928820309	0.0	0.1641779961888238	0.04781365403198248	12.47358329614	195.64700964711002	9578.2132346624	0.37649141526785496	0.4174585444721629
5276364	0.0888690638377	0.0		6.87093895229	0.0	0.032697547683900006	0.0		0.08380751924868096	8.34395960322189	9.19105339855477	95.28541019747	0.18036577675031565	0.19080464949566306
5280112	0.0660965406702	9.16297564362	12.6417013209	264.152898502	0.0	0.0606764260475	0.0	0.10364934122951308	0.0660965406702	14.385290842796	21.594368937789998	559.343211769	0.10224142843580246	0.14311406818473973
5279064	0.023327644544900005	0.185535598634		16.809768086400002	0.0	0.220391349125	0.0		0.02792960776936135	42.973575420874006	0.0	507.3595439454	0.31761777517462525	0.0
5279500	0.00842704911781	0.0		175.708263592	0.0	0.0	0.0		0.00842704911781	7.25761168399	3.92310562867	690.188167607	0.07943710804061424	0.045889667145125004
5275984	0.010923228844899999	0.0	0.312738655462	46.856719158100006	0.0	0.0	0.0	0.03732810272739865	0.010923228844899999	5.29879748220461	8.680755662791789	158.857347042977	0.12245375790241547	0.15435734763233544
5276402	0.09617345773630001	0.0	0.000173745022039	0.0347490044078	0.0	0.07509881422919999	0.0	0.0022215271021292227	0.01778006733377211	1.5531781182494702	2.1449835185589388	65.3750973360078	0.15802492626767148	0.19748293804522096
5275976	0.0	0.00210578800761	0.00294810321066	0.00547504881979	0.0	0.384615384615	0.0	0.4933332542744261	0.019398615654384204	1.90825308065878	1.67567861212083	23.079367873096967	0.5681485100145188	0.4808693309736554
5275244	0.0222185639525	0.00370240113989	0.0035125344147700003	8.90154872608	0.0	0.0530612244898	0.0	0.052186476551495095	0.07033894378224448	8.344177009184648	9.22409019683714	163.00082724608	0.2515731030227949	0.26756347027577937
5279990	0.10740613455499999	1.78939738913	2.46194754637	6.0496541100400005	0.0	0.236111111111	0.0	0.23111583086269674	0.01215482377334519	4.4155316976010015	5.1737798060805	133.0624660228255	0.14239877769315568	0.1391586902647139
5276190	0.0165103547285	2.05399369827	2.10237442725	54.713724982399995	0.0	0.0159906396256	0.0	0.03656346567606627	0.0165103547285	2.758843217804	2.806336226986	65.289872155409	0.21618482188956595	0.2299154175306542
5275410	0.0959268562512	0.180545397296	1.22230281592	73.4528400783	0.0	0.132785251619	0.0	0.17180980954835975	0.0959268562512	1.088213776331	2.233505247926	92.387467427024	0.35992714025485845	0.4057931336468011
5276324	0.0386973041135	0.0152534703229	0.0206088126361	0.0463678684901	0.0	0.4032496307240001	0.0	0.5030676353291303	0.038952632739729084	0.1647737663811	0.18651338778700002	86.59473012409012	0.5544217687075788	0.571684423695697
5279846	0.011041643111700002	2.6347710814400003	3.62555180601	39.7097985536	0.0	0.0280070754717	0.0	0.04341448748767654	0.011041643111700002	12.944135566622	11.16733621149	1295.98889765533	0.05434225366550583	0.0534535992393916
5278754	0.015715414471	9.756251519389998	8.09442419182	873.948646143	0.0	0.0830036398164	0.0	0.0840336137358267	0.017663295373698026	26.35807841089	35.74986939482	3667.3791296229997	0.12554449835334472	0.1449286071310941
5275954	0.022418113592599997	0.0428003432462	0.0457145071123	16.685370798599994	0.0	0.12277019937	0.0	0.13191921139833634	0.020648893751997525	2.0766532448432	2.0179692881063	66.74464623679998	0.5217856188185352	0.5084245012016197
5279084	0.008439534180569998	0.0996178320784	0.081127302954	108.662263639	0.0	0.0362622036262	0.0	0.028341413313262405	0.008439534180569998	10.1826391238784	7.386608490434001	1362.619439009	0.05201937213522539	0.045900215469486735
5279056	0.012489189812499999	0.0		0.0	0.0	0.0	0.0		0.012489189812499999	0.0046764212093	0.00039365279371900017	4.0718674898529	0.1910163635178956	0.09638401785718892
5275912	0.0033848333871	0.0162746713031	0.0256507661543	27.883314614099998	0.0	0.034082668600400004	0.0	0.07034397085110854	0.0033848333871	0.48849588079548	0.38940971370936	39.48836684085139	0.657457971945944	0.6385458443773483
5276526	0.124929797612	0.0	0.254251778126	2.75452105928	0.0	0.0238095238095	0.0	0.16693271995279862	0.025211032633822687	9.605659239303687	13.156159008314841	296.51761684395456	0.11315317622982413	0.12917437445816082
5279578	0.020990869875	0.000108145711692	8.18870726107e-05	1.4870809779299998	0.0	0.0188989317995	0.0	0.0163647403313645	0.02082597799573476	1.1317804457916922	0.8683502160486106	8.334624134270001	0.09482976040379452	0.08177419394940076
5276002	0.00929847010195	0.902652285033	2.188726711	55.749145527799996	0.0	0.0107858243451	0.0	0.0561455529012368	0.00929847010195	2.9793055298762003	4.206695999106301	122.49379176459999	0.39015677713833696	0.3919216087837001
5276338	0.034711813261	0.00482008897961	0.00706041202648	0.654568963459	0.0	0.100852272727	0.0	0.15002272153519294	0.033916301994483256	5.29879748220461	8.36713445582648	111.468049269289	0.14301552106463838	0.1717874404755806
5276142	0.258743130353	1.4448746787399998	1.4541584923299995	6.5988822249300005	0.0	0.384083044983	0.0	0.41559660168823787	0.02466401575877911	7.0653258051131775	10.21875351848955	175.1529174850486	0.13765495867801691	0.1645071109046606
5279850	0.0832264596388	0.0		3.6040911747800006	0.0	0.008888888888889999	0.0	0.00023289036689496377	0.0832264596388	0.897697453252	13.204047078699999	695.48217659978	0.05859455029708641	0.09700087608532396
5278866	0.144630697207	0.0118406614347	4.50941979408	17.0314038831	0.0	0.101538461538	0.0	0.2204513543713089	0.03386132438759977	1.2446242059816999	5.673210425303	601.5678899991001	0.08691916660708525	0.08351765583732201
5275818	0.006879165314129999	0.00220316276682	0.00123168942082	0.008665195291540001	0.0	0.264623955432	0.0	0.13251990960125729	0.005820258686947713	0.13659133199717	0.11193579908317	4.607634110634892	0.6104709062459239	0.5618186172647923
5275650	0.192570449443	0.0	0.0	1.0957140884299998	0.0	0.564	0.0	0.4956105863621486	0.01887851775447241	0.686161146383	1.22807915782	109.13413756543001	0.4976788740694436	0.5182356190807222
5275918	0.153465568734	0.0738910324581	0.0724421886844	8.914777838089998	0.0	0.221326720397	0.0	0.2189191976565528	0.153465568734	0.7320075494934001	0.6864220517165999	10.384369014341996	0.6866181657850905	0.6781351613449336
5276014	0.0135092201298	0.183919889969	0.993787858199	66.8104313931	0.0	0.00456621004566	0.0	0.030657274793440943	0.013509220129799998	2.8197091214181778	3.3924053424106497	115.3149841979274	0.15091342335200772	0.1774228411324266
5276066	0.043526100843	0.0623706388869	0.949274801125	77.81167110850001	0.0	0.0463689055574	0.0	0.07357560423723855	0.037132442464874495	5.4406038268369015	5.3576054247950005	336.9540810545	0.09140393043999176	0.09879330842951542
5279836	0.030366234298000002	0.0		0.5402631859979999	0.0	0.0	0.0		0.030366234298000002	6.2228507337900005	0.0	420.604769454998	0.12073050345478875	0.0
5280048	0.0246916036854	0.0243629630422	1.27328305981	55.8648836441	0.0	0.0184321563402	0.0	0.07132166516832789	0.0246916036854	3.3420247441922	5.43287330261	127.31174574667	0.1575041940898086	0.2203542087204608
5276126	0.056553954616999996	0.362633537443	0.332451064314	5.73872866528	0.0	0.21287128712900005	0.0	0.19451295565591634	0.03799301204621845	1.728868047763	1.725306426354	36.95722007998	0.4786516853930996	0.4739987165345139
5280082	0.0206650385189	0.38011585176	0.312073810986	408.310538344	0.0	0.113281762161	0.0	0.09436258933415777	0.023854351213976367	6.604689718434	7.570768496604999	487.0775742348191	0.14181770934860788	0.15371889156700855
5280118	0.045718121279400004	0.955854009866	0.960761023365	104.530180949	0.0	0.0456026058632	0.0	0.04821570823359858	0.044038422490429135	40.320142196956	40.600029941065	2150.11028422	0.07788818802382236	0.09329799119179212
5279744	0.011996127725400001	0.07548750832210001	0.6093080628199999	33.626727367600004	0.0	0.10802919708	0.0	0.12646318521600586	0.02694881573097813	7.438530514697971	10.65110867508027	181.9724591316504	0.22201524716255186	0.2547020418756086
5275950	0.000699936096109	0.00309924833709	0.00376337298076	7.054419276619999	0.0	0.0274509803922	0.0	0.03160889331377883	0.000699936096109	2.03695214993409	1.97601815397476	57.11369471481999	0.539991476062039	0.5248520592581235
5276216	0.0029829859396100005	0.017611388379	0.0380690709862	11.298482254100001	0.0	0.027518172378	0.0	0.067177834208576	0.00227018949470313	0.958996422589	1.0105144767732	27.98839054487	0.3449098071737856	0.3647378146708697
5276012	0.014105999249700001	0.439967488375	7.445038468330001	76.5893587404	0.0	0.00981767180926	0.0	0.061084782429014016	0.014105999249700003	2.421740736081	9.3727011561714	173.49451371930004	0.09187279151925762	0.10035337235629642
5280202	0.00523497280739	0.0		0.447918375306	0.0	0.0	0.0		0.015571297928117057	16.937868885985	14.342782450241005	1345.9825245903062	0.09737457759260908	0.10200453137920916
5280106	0.0270278525741	0.794868315978		293.115311266	0.0	0.0315720808871	0.0		0.0270278525741	1.174984167738	0.312073810986	701.42584961	0.07232539890148891	0.04706405106275316
5275430	0.035704345774199994	0.0022987419215500004	0.0159634855663	48.2903071142	0.0	0.00728597449909	0.0	0.04312610102904079	0.035704345774199994	3.739553662211672	3.8002365499581403	169.6602870375696	0.14593666539513492	0.2052013372699213
5275638	0.00711873903487	0.07489548428569999	19.5757960565	1377.8033693	0.0	0.0364251861882	0.0	0.08292957507373007	0.00711873903487	0.7610566306686999	20.80387521432	1486.93750686543	0.33513075014297944	0.3648315756090847
5275320	0.0137537440195	0.0474551746302	0.962754835578	27.274004803	0.0	0.053936494127900005	0.0	0.12802892818981793	0.02745159428625272	0.2982243299049	1.2294106095428998	52.2503552695	0.2332089552238584	0.2639409533548903
5276612	0.033515569875400004	0.0		36.5233148537	0.0	0.007345225603359999	0.0		0.033515569875400004	0.8387377503672899	0.36605581323919	47.0547517927577	0.41084936243802495	0.3537615469574153
5276050	0.09317328799630001	0.0	0.000644930871204	0.005481912405229999	0.0	0.0	0.0	0.14079021923692633	0.04239663379144041	4.071853344521204	3.4703272840584245	52.76808188557294	0.11314408717890335	0.1080184747806693
5276510	0.11529475585000001	0.0	0.000473241394502	0.0310715536834	0.0	0.0966386554622	0.0	0.1368488492455218	0.039069113521371324	0.1647737663811	0.18698662918150197	86.62580167777351	0.5347197106691701	0.5529699812510059
5278872	0.18863546054699998	21.804122911599997	17.9688228566	76.9005248485	0.0	0.28287092883000003	0.0	0.1986625893309157	0.04407140149895712	116.23818088218405	169.27265567778798	3495.0742267645146	0.1954625980193097	0.19886964598554246
5275624	0.0166988709148	0.00018089136574400005	0.00018089136574400005	128.212881772	0.0	0.000550964187328	0.0	0.0005275032545695101	0.0166988709148	0.944311656836044	14.311195534555745	376.143900673	0.07659115426099695	0.1031377984251322
5279038	0.0402095052695	0.0		0.0985424023129	0.0	0.0842391304348	0.0		0.031945751438477867	0.0046764212093	0.638976105924719	5.3113563320799	0.2966645949866025	0.20623635879070554
5276028	0.0475388944544	0.7876292143629999	0.935585241881	192.28929095400002	0.0	0.0855544102489	0.0	0.08458143643484849	0.03977507673533947	2.769402462069	2.8632479297224	289.1944459329	0.10837651122615873	0.10077537595129267
5276024	0.039898141276	0.00392627452675	0.615887498177	22.3431750243	0.0	0.012947448591	0.0	0.041204407124195576	0.039898141276	2.47646112111475	2.3116649731961	74.49631319694879	0.11812536960392725	0.14310208068640273
5279728	0.008562044807199999	0.000108273397927		0.000631594821243	0.0	0.275700934579	0.0		0.010753108309765008	1.258524895702727	0.0	8.748889873789643	0.4889896373059709	0.0
5278870	0.011767071488099998	0.0		1.71369556926	0.0	0.00080064051241	0.0		0.011767071488099998	1.2593650069436315	0.0	11.749131095232046	0.2946954813361087	0.0
5279108	0.0387817008234	0.897697453252	13.204047078699999	691.878085425	0.0	0.060996563573900014	0.0	0.10167716405496456	0.04083047581489047	1.7784975891547998	14.1731531355616	745.3165068830998	0.09128065395089356	0.101219801517024
5279718	0.0032787141771	0.0		0.0	0.0	0.0182623132263	0.0		0.003042956609152389	1.6034584217984802	0.0	40.2656324861079	0.10097310871618416	0.0
5278824	0.00211786371628	0.00033757367054900004	2.25589804324	98.1114708394	0.0	0.0011458034947	0.0	0.029548707138407636	0.00211786371628	155.41606844467051	276.05212868624	5250.3624598094	0.05442735553231546	0.08634598404661027
5275416	0.0226556067185	0.196439106512	0.196439106512	0.201292006124	0.0	0.370967741935	0.0	0.3736642861006544	0.04230943764221223	3.736744088752	3.782868277662	120.92857271422399	0.195301542777339	0.2634650004949916
5276072	0.00601484085757	0.0	0.12720973464500002	6.1884366904900014	0.0	0.0033333333333300003	0.0	0.0224134266956132	0.021358954016514456	9.605659239303687	12.90190723018884	293.7630957846745	0.1136363636366814	0.12897017016885168
5276096	0.122361447654	0.06818241960719999	0.0589996352501	138.409627164	0.0	0.116150442478	0.0	0.09441248940370288	0.053878423831940976	9.6897616260579	11.476336759806001	419.3686728216237	0.11719920119852187	0.12856139464262534
5275458	0.015098172224	0.0	0.00162657102919	10.0287682844	0.0	0.0	0.0	0.0200441373963375	0.030991883889174437	4.554661422278301	2.78761281385579	45.89832704285999	0.22666840458791515	0.24447565158309725
5276178	0.00941864832139	0.0	0.00723619514611	442.451204212	0.0	0.0	0.0	0.00707507079371819	0.00941864832139	1.8297899682453	1.9288595925698089	810.59347430273	0.07867877521507555	0.08424741889825725
5275468	0.0	0.0		0.0241685241199	0.0	0.0	0.0	0.0002286406319432928	0.02744032341194902	4.555149393587059	3.5513124178139703	46.38550733748789	0.2282836211405669	0.25712368224557003
5276396	0.0727558588162	0.0	0.0	0.000383123653592	0.0	0.2	0.0	0.252270376751338	0.0357524896321028	3.7372549202901215	3.78427306439184	121.36997992336958	0.19077673988082888	0.2576169842339627
5276522	0.164327913356	0.0	0.00013709186532700002	0.00013709186532700002	0.0	0.25	0.0	0.9064504824367076	0.013521453447951788	0.3897530114516623	0.542157198232939	6.545615265837487	0.4216801173879236	0.5081317295560149
5278914	0.0143182569328	0.000324820193782		0.16578722851	0.0	0.227722772277	0.0		0.010838593740858705	1.258849715896509	0.0	8.914677102299645	0.48478572566539	0.0
5275932	0.023344345247299995	0.0	0.007902408833619999	94.69618490010001	0.0	0.0	0.0	0.007162231969848634	0.023344345247299995	0.33399679945395	0.25640930316898	96.2307619135004	0.3865381929900347	0.36672396759419296
5279052	0.0129320942619	0.5428264860600001	0.683587254172	21.825759855300003	0.0	0.0581837955411	0.0	0.04791665865808128	0.0129320942619	1.2015531135508102	1.2105516967443508	51.25962366758687	0.09592476489020844	0.07838496926044862
5275222	0.024787753859399998	0.000219686553464	0.007249656264319998	12.067041577100001	0.0	0.000410172272354	0.0	0.013272822877206306	0.024787753859399998	0.499064308227264	0.7495295140465199	51.57745652748	0.07294317217992455	0.08398167789570612
5276132	0.18119402354000005	0.00045374291949		0.00362994335592	0.0	0.111111111111	0.0		0.11213511860610433	1.87018105036049	1.718026214905	194.244259081956	0.09443406798652264	0.11074643178600796
5275422	0.44107571245899996	0.175511788502	0.231055850514	0.231055850514	0.0	0.942465753425	0.0	0.9999999999984264	0.12806570752727894	1.5902485617189002	2.8057754843219005	12.5412229176599	0.5682189542487128	0.6337443146078426
5276506	0.145812201852	0.00147405160533	0.0025269456091300004	0.0452744421636	0.0	0.12552301255200002	0.0	0.14634446199916154	0.01962158824811276	1.90972713226411	1.6782055577299602	23.12464231526056	0.5580485010500791	0.4732360061994618
5275264	0.0270281385574	0.202748141597	1.6179366364200003	12.781041979600001	0.0	0.0569280343716	0.0	0.11308183648105155	0.0183807302584954	4.1063586359647	5.5748610372859	106.64122681725	0.12554434413148333	0.16209637350478293
5276114	0.040826322466	0.00249620326213	9.60078177741e-05	1.34571573314	0.0	0.0426929392447	0.0	0.0013723690528422575	0.040826322466	0.07543327811433001	0.0605966698858741	7.067003424109999	0.3706383662967397	0.33994392178997024
5279820	0.047604716946400005	0.0		111.203501819	0.0	0.0	0.0		0.047604716946400005	0.35791043021554003	0.6898280512287399	261.76163561935	0.08608544506438016	0.06863505061008908
5279024	0.018042823071	0.00591610971105	0.0	6.1674415034	0.0	0.048502604166699985	0.0	0.07088825323493794	0.018042823071	0.41445682652105	0.887133480592	75.59409212039998	0.13248244674532686	0.1595745087283237
5276120	0.014086485301700001	0.0	0.419172848429	34.4610156712	0.0	0.0011709601873499998	0.0	0.031991965961389965	0.008860667545636476	12.698635322149999	9.921306909789	218.78345789029999	0.09460834181083663	0.0848965625897145
5279016	0.008275186980890002	0.0318074528404		8.441847004349999	0.0	0.055560725919000006	0.0		0.008275186980890002	0.1344203780899183	0.0	13.7561889429682	0.13707237607631434	0.0
5275732	0.204135408096	0.213860266376	0.7926373635709999	83.2034707004	0.0	0.265906932574	0.0	0.2657410641832045	0.204135408096	15.8184754644645	7.227021429817199	158.00910428179	0.3625860373647979	0.33517124606865184
5276516	0.00498884108142	0.0		22.6723493948	0.0	0.0	0.0		0.004045709886083459	3.8051219660748963	3.8661932927168	98.27331811308001	0.5097416349006484	0.5283518646766227
5280198	0.0164420372138	0.0	18.253402674300002	329.823934604	0.0	0.0277626565052	0.0	0.09222676414858907	0.0164420372138	6.712212484796	40.980416944590004	921.213360062	0.08587396254722603	0.1183612275697253
5276158	0.040022350771800004	0.0250885658897	0.0613276055083	0.455974729266	0.0	0.0542949756888	0.0	0.15496674101177518	0.02620623731645487	14.081672849699798	20.3554294317639	230.571530549067	0.20633815079230086	0.2301610183823659
5275990	0.103736802543	0.0	0.0	0.0	0.0	0.923381770145	0.0	0.8663644609362003	0.05692028832974234	8.690241312574999	13.842892658869	54.80787411035599	0.6217272834975217	0.6215706934422437
5276108	0.016531243921100003	0.00164376909379	0.026026343985	31.9631898407	0.0	0.00285306704708	0.0	0.047817488018412686	0.016531243921100003	3.8059438506217904	3.867563100295	99.3103484089	0.5204754186927859	0.5403483332794312
5276084	0.00935148404628	0.00233578807092	0.230319557857	379.255637236	0.0	0.00288517022504	0.0	0.02927063656929786	0.00935148404628	0.7899650024339201	1.165904799738	571.5449281900002	0.06874706710467787	0.07333629141291051
5280188	0.0267971833989	0.00138740899274	8.679352707080001	175.29898219	0.0	0.0419123301718	0.0	0.08188986538275027	0.0267971833989	3.7285242176373847	17.047437646359686	313.943099059617	0.07967839776623975	0.101824463496045
5276148	0.0449324372574	7.1392459741	4.51033674079	1067.82115009	0.0	0.0558940707757	0.0	0.054088475244703095	0.04181440428694156	12.51747916205	8.918667364460003	1326.963560036	0.08274674634142364	0.08321891636979797
5276180	0.058157477174500004	0.05850944493430001	0.0669613516657	303.816215027	0.0	0.0662049297209	0.0	0.050199588991025064	0.043150343068311885	2.5567573930474774	3.1913641613852493	369.5501327710487	0.11480278422284268	0.1231254647413678
5276202	0.00461585820799	0.00887719797902	0.0190859756549	94.41453521	0.0	0.00726072607261	0.0	0.02392827155850156	0.00461585820799	0.46935911726902	0.5034713863279	103.90103413257	0.18679620225216248	0.2006593856421692
5280054	0.12084547543400001	0.275154675939	1.52515889786	10.3540555746	0.0	0.16170763259999998	0.0	0.185141252620221	0.028230529413492262	4.0925879027860015	4.84389351015	295.661264077	0.10385327470506396	0.12271251357584845
5278894	0.0	0.0		0.0	0.0	0.0	0.0		0.0	1.597549687255	0.0	37.360269548527896	0.08631578947373426	0.0
5275252	0.013633833368	0.000389227148844	0.00194613574422	9.83992305613	0.0	0.00235849056604	0.0	0.012975976033915886	0.013633833368000002	4.106747863113544	5.5768071730301205	116.48114987337999	0.10674106741048683	0.13933440841517888
5275948	0.0389344202724	0.7805878199580001	1.13785517105	47.259441538500006	0.0	0.0559360730594	0.0	0.06004982579435856	0.03264277557031487	1.2312717633028	1.5905926531981998	63.004737468550005	0.13038968736111334	0.1280496967203192
5276290	0.0486809351267	0.019667645829	1.02101755881	22.292580091199998	0.0	0.0197089144936	0.0	0.105682319891593	0.048680935126700006	3.358545481359	5.9083395474717	40.0412878966737	0.3925348189414489	0.492335613893329
5276076	0.000796425164545	0.0013705963210699998	0.821275531409	1.17506263327	0.0	0.2	0.0	0.3143690119474133	0.03060541937503755	9.605659239303687	12.23064130350384	282.0872649639229	0.11599099099132001	0.13036545022527452
5275562	0.031951995231300004	0.00935112838852	0.00509171388694	18.4722573049	0.0	0.0308512356647	0.0	0.016665299693224073	0.031951995231300004	2.2712713699295315	10.142387861172262	91.96591608735892	0.10582977859038778	0.1107253473516044
5279752	0.12846811884	0.0		0.0	0.0	0.0	0.0		0.013435753236693512	0.0046764212093	0.00039365279371900017	4.0718674898529	0.22486569455111285	0.11346388717662476
5278950	0.00787080837315	0.676312015634		22.102414298699998	0.0	0.0632201806291	0.0		0.004885264627670514	11.837607815758481	0.0	267.36156293886	0.29778237984322	0.0
5278860	0.0112275998745	1.4789165334099998	3.84201166089	348.368678146	0.0	0.0266619581531	0.0	0.04790384912503494	0.0112275998745	3.16610149875	6.402425815060001	679.7953373569999	0.09635315202980664	0.106380417343068
5276156	0.0143834750999	0.0	0.0118578231486	258.637420136	0.0	0.0	0.0	0.011702263375767444	0.0143834750999	7.1392459741	11.758624272018599	1395.7908430440998	0.04324371356476228	0.04636811430276258
5275668	0.015421645884100001	0.0		8.38083616256	0.0	0.0	0.0		0.04028111597876777	0.311915252423407	0.31768738639629995	26.236106692915	0.6264556040756669	0.6152494353884672
5279086	0.0	0.226343193382	0.236303218	2.32192373173	0.0	0.139240506329	0.0	0.23495896021591645	0.010550212235179268	10.309364485182	7.54178440548	1256.27909910173	0.05988581357821464	0.055566834132144326
5276318	0.576211290212	0.00257864719606	0.00257864719606	0.00257864719606	0.0	1.0	0.0	0.9999999999970896	0.15987641210203896	0.17394581533201994	0.19033009442472	86.57278777487383	0.6401268569521671	0.6475666430703471
5276008	0.00471325574622	0.320962274563	1.90881027358	63.38077482520001	0.0	0.00444883835887	0.0	0.02226418371173329	0.004713255746219999	2.2306894068271106	3.5870158313099605	86.50541714046058	0.4684324237815894	0.4002332057759461
5278874	0.0322930459995	4.32595584375	1.7509913057900002	353.502136701	0.0	0.0821377795011	0.0	0.052219094655709335	0.0322930459995	6.639291456914999	4.2327167792710005	398.5854095974	0.3295230358592226	0.2642246456773875
5275924	0.0515651779747	1.88891144405	1.83013453774	39.18821079999999	0.0	0.175044883303	0.0	0.1298262662224461	0.035249355719204636	2.0833205675843	2.0223433800272	50.18760160101199	0.6286563614744659	0.6164411792822958
5276058	0.0035397312915500002	0.0		48.998035810699996	0.0	0.0	0.0		0.0035397312915500007	3.6796316733568952	3.7231637796468	105.05700208618	0.06713649851639476	0.07408370752744936
5276152	0.311069128614	0.00827578059398	14.0563866046	28.1617270562	0.0	0.354166666667	0.0	0.5533359884578641	0.009820286110190814	2.5065237287071573	17.180789414319552	93.89564480024859	0.15867158671607912	0.19009851645810985
5275440	0.07393563602410001	1.37245259699	1.65122215991	26.262723152	0.0	0.131133671743	0.0	0.18794961449621034	0.04638145244542196	2.41675218685	4.388613602374	46.67858269165	0.28203070131436897	0.3392027457984849
5276186	0.0168043142682	0.0	0.0	7.131339120800001	0.0	0.131158029431	0.0	0.14178156444495674	0.0168043142682	0.4075292566557	0.5585625247836999	13.712816187247801	0.3323472233960052	0.3744188122782486
5276046	0.0318863060756	0.000644930871204	0.00225725804921	0.0148334100377	0.0	0.0434782608696	0.0	0.157377090928906	0.051272070596983584	4.071853344521204	3.4680700260092103	51.06891544813772	0.11501028101450207	0.10675332746784563
5276206	0.0	0.0		6.49392260273	0.0	0.0	0.0		0.0	1.728868047763	1.725306426354	43.45114268271	0.4140388768897114	0.410014008578991
5276292	0.0373270723564	1.16393777597	1.27991063501	41.2942641709	0.0	0.170984455959	0.0	0.15175237065990466	0.02288571853456844	4.5028156115	6.167232623671699	59.042971976373714	0.4547632629778669	0.5178303667185328
5275816	0.0515131580715	0.00201707966335	0.00201707966335	0.00201707966335	0.0	1.0	0.0	0.9953721683978332	0.006304849754216495	0.13438816923035002	0.11070410966235	4.598968915343352	0.6730510752692097	0.6394991797906033
5278902	0.0	0.0		0.190586549348	0.0	0.042269187986699985	0.0		0.002081741573443324	1.6034584217984802	0.0	40.2656324861079	0.1202580645162126	0.0
5276052	0.000269920581949	0.0008218845468949999	0.0246565364068	8.25381015008	0.0	0.00222057735011	0.0	0.06616681184871279	0.002784935948889773	3.8051219660748963	3.8661932927168	75.60096871828	0.5661531224275812	0.5868228872169851
5275644	0.028791313714	0.0		61.8724587762	0.0	0.0	0.0		0.028791313714	0.311915252423407	0.31768738639629995	92.550260500655	0.5158398087268138	0.5052915267326682
5275704	0.23589466294599998	0.0124115333165	0.0137481599813	0.026350639964200003	0.0	0.654320987654	0.0	0.6866588288734946	0.0756775287704936	0.331391812397	0.33735489303629995	17.858516623684	0.7070281124497784	0.7004204586008085
5275764	0.341590042659	0.367547648992	0.0	11.9476181202	0.0	0.457704239917	0.0	0.423549037763431	0.341590042659	0.367547648992	0.0	11.9476181202	0.7511543304884185	0.7226987913307302
5278746	0.0139709182942	0.0165513897955	0.0203671136987	111.863308707	0.0	0.019981267561700003	0.0	0.023985956305959504	0.0139709182942	3.0491220691355	6.4698530238086995	200.49192980939998	0.219160387513549	0.2615073247640605
5276122	0.0532611513124	0.146473766654	0.166003602208	9.16583287145	0.0	0.198198198198	0.0	0.2239176815040441	0.01510057186738711	1.425878980081	1.5565991805030002	10.69034881898	0.670764809196952	0.7198322786303532
5279542	0.0339435188115	0.723787633135	0.353394591253	42.0737183126	0.0	0.06578947368419999	0.0	0.036221453402210335	0.0339435188115	0.7558814859624999	0.3855807741855	45.573959150540006	0.10116771199829827	0.09414706194239918
5276406	0.0258537470151	0.0	0.00493493424437	0.615800381958	0.0	0.0	0.0	0.11067874838314372	0.02705876903390245	4.555149393587059	3.5513124178139703	46.36133881336799	0.2341339058095389	0.2637071993458253
5276532	0.123364199028	0.0		2.66209147018	0.0	0.046875	0.0		0.03358353604401891	0.7810283696165776	1.8581034282006497	34.36237216890739	0.16759776536319945	0.206078257564214
5276170	0.00448080176657	0.0		9.349233763700001	0.0	0.0	0.0	0.00035635955154097456	0.00448080176657	0.6462600128733	0.6298371966121	10.8974394476393	0.3764593757445359	0.3773680159613503
5278892	0.0	0.0		0.0	0.0	0.5	0.0		0.0	1.6034584217984795	0.0	40.2656324861079	0.10105659587828976	0.0
5276548	0.12462897072000001	0.0	0.00626989564626	0.0592156811035	0.0	0.005524861878449999	0.0	0.16658576480631349	0.03758386668651948	1.8737504476338	3.5082510106485603	202.4528897454535	0.08807146610641825	0.0928298635741924
5280200	0.0313740436489	0.0		45.2220608504	0.0	0.0	0.0		0.0313740436489	0.955854009866	0.960761023365	149.7522417994	0.040262517513464616	0.042569624266711584
5280110	0.0823978757739	5.78115615435	18.9874444716	416.81364131199996	0.0	0.100697778631	0.0	0.125993020817919	0.06983909106958243	11.003471353526	27.940112088490004	712.0039545789999	0.1167177112122018	0.1477248935964979
5276470	0.178057914229	0.000190946666407	0.0	0.016421413311	0.0	0.162162162162	0.0	0.007118989532630534	0.054285900416291374	0.311915252423407	0.31768738639629995	17.855270530355	0.6808384417638651	0.6686594615177013
5276154	0.414171238734	0.0273184404941	0.0351642185415	0.0961510987545	0.0	0.376068376068	0.0	0.44534506666393503	0.019142667182732248	2.6420873933469005	2.7361060515848004	126.52445792170452	0.14131188462102384	0.13207730114492874
5275652	0.275573426195	1.73841997125	1.74756006413	3.14739468745	0.0	0.738788355625	0.0	0.7503614007942732	0.275573426195	2.424581117633	2.97563922195	111.18581816445	0.5501658374789472	0.5713277845647934
5275748	0.596157119362	0.0771020042885	0.0622517995362	0.12883820149	0.0	0.712765957447	0.0	0.6292049142290904	0.09004067999202957	15.7492778209605	6.5866303874482	76.2972103354	0.6952573158421579	0.6729678759302637
5275708	0.00881285865329	0.00403129030019		6.86462967461	0.0	0.0283018867925	0.0		0.011120852598408086	2.0980731525311898	4.820814845859999	71.56333964750999	0.6834862385323536	0.6563816625712166
5278906	0.0102494433449	0.000291729062155		0.325753653531	0.0	0.0255009107468	0.0		0.011719304803623723	1.259267763922913	0.0	9.330042404820043	0.3742543545695151	0.0
5276106	0.0	0.0		0.178774710279	0.0	0.0	0.0		0.0	0.8012040048492	1.002502744755	190.6369891951848	0.07058372226838146	0.08986753658690899
5276090	0.0352962524194	0.00547504881979	0.0016846304060899998	1.32638601601	0.0	0.182156133829	0.0	0.030353741509961563	0.03390755318500393	0.8387377503672899	0.36605581323919	10.531436939057704	0.4571738344779521	0.3943752988247105
5279520	0.0678587446737	1.6871849653400002	2.56041415417	331.42665921099996	0.0	0.151405258386	0.0	0.15257360293520555	0.04286610939198339	117.92536584752405	171.83306983195797	3826.5008859755135	0.1882142365410176	0.19125297058397767
5276614	0.11017445569	0.0		0.126140531618	0.0	0.006309148264979999	0.0		0.11017445569	1.87018105036049	1.718026214905	194.3703996135739	0.09239527076336332	0.1081842788976585
5275882	0.0247724803445	1.2346698712200002	1.625326804	13.7584420145	0.0	0.0472027972028	0.0	0.16412664927670234	0.01261170932221994	2.9680338012903498	3.55583911684235	56.411981251743356	0.4643871753247608	0.4434449662507973
5275826	0.0	0.00240816437872	0.00240816437872	0.00240816437872	0.0	1.0	0.0	0.9999999999892776	0.05921417025586057	10.294093783276722	9.76193359503172	67.47574039068473	0.6656508489335321	0.6238195718646593
5278844	0.056318558317599986	0.955544079792	0.137209602079	139.124991676	0.0	0.112976113622	0.0	0.0676651413586023	0.056318558317599986	2.794537823032	2.271504958139	171.49459191740004	0.3693708541056323	0.3012412160435424
5280102	0.036092895454599996	0.931056330446	3.73956979869	174.575784146	0.0	0.0820162323793	0.0	0.1134064595815196	0.07171965492698266	11.051345105326	16.785242590209993	417.785114474	0.1573682582244004	0.1960561022291248
5276530	0.21276125580400002	0.0	0.54405619204	5.48095820384	0.0	0.14606741572999998	0.0	0.2829186946183687	0.031245097362387182	9.605659239303687	12.77469749554384	287.56822316776294	0.11616727033289012	0.13125957197377536
5278990	0.0545943909455	0.102534810303		5.2409809934	0.0	0.234722365836	0.0		0.03068023025152459	10.336684204263001	0.0	232.59369796202998	0.3081205463184958	0.0
5275228	0.020983491076	0.450032796827	0.694298511225	30.7442949586	0.0	0.0641025641026	0.0	0.08093980005251067	0.02267597148949073	8.839101823755799	9.9298207219222	119.02333746948	0.16532054517946151	0.1805941323378491
5279078	0.0912927717713	0.0630825518128	0.054854979014599986	15.8865212554	0.0	0.150600077429	0.0	0.1354029848385542	0.05751855622586246	0.9128939887303	1.0012922397941	55.26221866870999	0.12165639108673275	0.11698099616842647
5275250	0.062227713455499996	8.06105426796	7.46436759911	41.983269188	0.0	0.200878844947	0.0	0.2021284367200734	0.04456893915442396	8.944518099614758	9.551930816805367	177.52371859049995	0.281789891619307	0.3059951813124751
5278854	0.14214607977399998	1.7919127726		6.17300608505	0.0	0.607931726908	0.0		0.14214607977399998	31.856811263700013	0.0	84.18663357715	0.4525985487353769	0.0
5276572	0.052018678305	0.0		5.9505469609000015	0.0	0.0	0.0		0.05201867830500001	4.555149393587059	3.5513124178139703	52.3360542983879	0.21817954488603325	0.24574311416418315
5276100	0.048743833249	0.00155370780703	0.00219346984522	0.00223916713367	0.0	0.6938775510199999	0.0	0.9751653759586324	0.015958953825399774	0.38906755212503	0.5387755988882199	6.5237262646736704	0.4655136915789509	0.5477977781717722
5279552	0.028725956541300002	6.2228507337900005		420.064506269	0.0	0.12586189153	0.0		0.028792830649248383	16.607983428879994	0.0	715.0386905851	0.2480006495354617	0.0
5279992	0.0	0.0		0.035574874084	0.0	0.0	0.0		0.0	1.806575810191	4.0078140325252605	203.4897744995775	0.06953687355722513	0.08204331579327122
5276606	0.0108432014629	0.0	0.000456972884422	4.11319914569	0.0	0.00386398763524	0.0	0.015234432163522126	0.0108432014629	0.3897530114516623	0.5426598684058032	10.662104616295329	0.33654688869397603	0.4084277820674799
5275258	0.014349904278	0.0		2.91396434249	0.0	0.0	0.0		0.014349904278000003	1.684009857051758	5.266419577526701	143.40011136978995	0.1306192453509933	0.14613081371288306
5275870	0.143370380605	0.00671704750857	0.0268681900343	0.800589424849	0.0	0.0935064935065	0.0	0.16782856850429406	0.04973499265604613	0.47893825700095	0.39062713758935996	12.405641651600401	0.7061855670106786	0.6867815925068366
5280098	0.0384625294889	0.75913215302	0.7996788172600001	107.271299551	0.0	0.0494176372712	0.0	0.0565809614749581	0.0384625294889	5.241698462971416	4.573527651284166	521.0390039859889	0.10249130753741363	0.09132046531494016
5276604	0.031598957464	0.0		31.118956614200002	0.0	0.0	0.0		0.031598957464	4.071853344521204	3.474519334721254	88.54648440181295	0.10109125794469198	0.09925183510381462
5275286	0.0115688368414	1.70516374099	1.70752765864	5.90445749844	0.0	0.0598052851182	0.0	0.08264656018906964	0.017278184330423885	8.1546544069385	12.672905634985998	143.88256192235	0.22448979591867232	0.25069282610754096
5276176	0.020841882322799998	0.0029740579484499995	1.6076673091999998	9.942067597180001	0.0	0.00475161987041	0.0	0.04805696656011119	0.020841882322799998	12.70160938009845	11.10980137056	194.26450981628003	0.08493626008905719	0.08187150870965547
5276044	0.0446317532633	4.07120841365	3.46581276796	51.054082038100006	0.0	0.115464201959	0.0	0.10643208410749126	0.03325734587111074	4.2012142716809695	3.5860054408279702	56.739763817468976	0.3073243860650092	0.29207612943830497
5280184	0.00657517248885	0.00176323286723	0.0176323286723	18.0091197707	0.0	0.0213390237397	0.0	0.04000672590074447	0.00657517248885	2.9974466801228505	4.2410491080817	119.62296140362407	0.08663366336633563	0.10142956858386468
5276574	0.0171523252061	0.0		0.0695224096416	0.0	0.0	0.0		0.0171523252061	4.555149393587059	3.5513124178139703	46.45743394586393	0.2123646099547881	0.2391935532536372
5275254	0.00859650038701	0.0		4.28161525261	0.0	0.0	0.0		0.00859650038701	1.684009857051758	5.266419577526701	144.76776227991002	0.13466728711012602	0.15065957694847076
5276578	0.0095263836378	0.0		22.4485102347	0.0	0.0195439739414	0.0		0.0095263836378	1.107506873883354	1.106058799294288	30.496047490576785	0.14723356851090644	0.13803763939437594
5275830	0.570130514816	0.00690440600738	0.008877093438059999	0.0157814994454	0.0	0.528301886792	0.0	0.5719009713844464	0.057493350651679764	0.47222120949238	0.36375894755506	11.605052226751402	0.7654522613069372	0.7369818222156252
5276546	0.1000331236	0.0	7.236429708080001	69.33227281810001	0.0	0.0313971742543	0.0	0.06930146685215413	0.03282174008623446	7.1392459741	11.746766448870002	1137.1534229081	0.05419256351540866	0.0551451403470852
5276320	0.359767097868	0.116612156533	0.118617771019	0.153429508166	0.0	0.767736104835	0.0	0.7813734184113391	0.18507073611086824	0.27601726684276	0.29440716042146003	86.71167657801756	0.6274222187910693	0.6378703522831455
5276550	0.0110726347758	0.0276673543558	0.016075244813700002	7.12440702185	0.0	0.144838212635	0.0	0.1540010257147153	0.013747739801910686	2.6697547477027004	2.7521812963985	133.64886494355449	0.14184980608795775	0.13542164178326266
5276534	0.0026154774069	0.0		0.0191450072452	0.0	0.0	0.0		0.0002736089079331739	0.7810283696165776	1.8581034282006497	34.38151717615259	0.16589057043080366	0.2039790902141711
5278864	0.0223016223728	0.124726659327	0.104081747413	136.846497656	0.0	0.0498482878197	0.0	0.041001424951833065	0.02778836668981836	27.835903353246998	1.228691032737	727.5023128160001	0.14252321277845895	0.1332016457408238
5278836	0.271414178141	0.123501586058	0.0	2.3793103595200003	0.0	0.3763589301120001	0.0	0.0003539171207140264	0.271414178141	1.028359862219	1.06046927205	3.59701486934	0.5253092075123844	0.2812106141526193
5276544	0.0	0.0		9.28819585987	0.0	0.0	0.0		0.0	0.8012040048492	1.002502744755	190.45821448490585	0.07240768675803465	0.09218981699716952
5276394	0.0985853386213	0.000510831538122	0.00140478672984	0.441024085492	0.0	0.08085106382980001	0.0	0.11572882153522834	0.04259163715987554	3.7372549202901215	3.78427306439184	121.36959679971599	0.1907728573837253	0.2576192348685319
5275238	0.0961580152441	0.048811824846800016	0.0479813465572	8.76611999178	0.0	0.200752823087	0.0	0.19793499090329908	0.04037974668061695	8.389286432891558	9.26855900897957	162.86539851178	0.258813029897415	0.27284172711063165
5279522	0.21679928798099998	2.86514899379	3.3319028125200005	142.046549595	0.0	0.25049776008	0.0	0.257347191607667	0.184860181760353	97.2890183870266	154.62958108125662	3560.207373583737	0.2030277988198436	0.2088059435965637
5276472	0.012241782383399999	0.0013299518614100002		34.8812380522	0.0	0.00209277990931	0.0		0.011383490664089798	2.0994031043926	4.820814845859999	106.44457769970998	0.5393017934904859	0.5174897719083131
5278890	0.0	0.0		0.0	0.0	0.0	0.0		0.01465939332310504	1.259267763922913	0.0	9.33004240482004	0.3734079276278628	0.0
5276004	0.0192409826702	0.0	0.0047513837053	97.89807709889999	0.0	0.00227531285552	0.0	0.0343310464744026	0.0192409826702	0.811086718371478	2.0450245561935203	213.79499303160745	0.07519869574075498	0.09815931783321948
5276068	0.45962770904	0.00107080214366	0.000475912063848	0.00297445039905	0.0	0.36	0.0	0.19819813314779305	0.030052930407701163	2.47327866136846	1.7066015472011482	67.12886843426804	0.12696613291776426	0.1536082893001412
5276512	0.15524649581900002	0.0	0.00088255150331	0.532578615588	0.0	0.0670926517572	0.0	0.17824772950258747	0.033634733401407435	5.29879748220461	8.36801700732979	112.00062788487699	0.140881745533236	0.17196900377498375
5275884	0.0098266501019	0.680486308342	1.84488124401	14.0858711695	0.0	0.050728862973800005	0.0	0.11982119004857858	0.012843792146321736	2.41385023841235	3.7753935568523502	56.73941040674335	0.4215837803437501	0.4075103632071003
5275850	0.0194506948405	1.59897576084	1.81980820318	38.0545703219	0.0	0.163265306122	0.0	0.14118068003238698	0.014943063208797519	1.7333639300703505	1.93051231284235	42.65353923724335	0.4900904782422275	0.4606541516567842
5276118	0.052950778484500007	0.00285547238309	0.0167759002507	2.35825262059	0.0	0.00878155872667	0.0	0.053177922202354413	0.04539239477980938	2.4876450546151903	1.7256409570256002	55.173252017367794	0.12376705850570965	0.15392509680983354
5279504	0.0145374414056	6.65530768831	0.432072509997	176.176221639	0.0	0.124185740752	0.0	0.07422371014859831	0.0145374414056	7.5601659644709995	1.492541782047	177.39392614882	0.2279613624810532	0.18787318123958466
5278948	0.580579374748	0.0636882917734		0.145262727927	0.0	0.817365269461	0.0		0.031133359666247414	1.2525228746368802	0.0	11.641818734337	0.4728168797169093	0.0
5276048	0.046588527887000006	5.378233187949999	4.40833062367	259.142409946	0.0	0.103183804513	0.0	0.10538953837653656	0.04587282031455829	5.986882038997999	4.972221887669002	260.48367495944	0.329283544756516	0.326049741139963
5276560	0.07059044053730001	0.0	0.0011920864199100002	3.19175297386	0.0	0.0383561643836	0.0	0.07540265278347935	0.07059044053730001	0.15273297058620006	1.07375866842591	38.15167936836	0.16244916403063267	0.20922798794595032
5275442	0.010209704427200001	0.00208494026447	0.0130308766529	23.0988800496	0.0	0.004909983633390001	0.0	0.0314701085211376	0.013045684799569902	1.5531781182494702	2.1448097735369	65.34034833160001	0.16007018912063828	0.2022988024406784
5278686	0.0251044373305	0.714823366285	0.7293088387409999	119.238550595	0.0	0.0643095055086	0.0	0.07088856689775783	0.02182051577956157	16.937868885985	14.342782450241005	1345.5346062150004	0.09789369152740478	0.10254832807605124
5275448	0.00681803328078	0.00236942355696	0.00268686482741	2.75649020036	0.0	0.0171122994652	0.0	0.018977138442830808	0.00681803328078	4.34801032992896	5.986532420781112	57.142935402233704	0.2444158765871081	0.26065682173583
5275226	0.026553576497999998	5.32124650823	6.393704844069999	321.142766052	0.0	0.0390884177124	0.0	0.05601318011478918	0.026553576497999998	16.55818093601	23.958571750025	586.0888444804	0.12731277533030627	0.13879810659322886
5276010	0.00307367131063	0.0		1.0719463752299998	0.0	0.0	0.0		0.00307367131063	0.1647737663811	0.18698662918150197	87.69774805300352	0.4900563473650167	0.5067822333970937
5276590	0.00483881080616	0.0		3.52699885685	0.0	0.033562822719400004	0.0		0.00483881080616	0.13659133199717	0.11193579908317	8.13463296748489	0.5286289830304655	0.4821173313092693
5275456	0.00524556580611	0.012994400138299998	0.0233535276566	5.11333254746	0.0	0.0718701700155	0.0	0.1286088496094213	0.022948242915940067	4.5694881552279005	2.8003310197635	35.8847297457043	0.28710323134091364	0.3028391464216945
5278976	0.015966831607600002	3.83051644559	1.67259826945	251.59783182599998	0.0	0.0278594706303	0.0	0.029732186999563374	0.015966831607600002	5.063299990137	2.836388900673	836.1343179419998	0.048500154623258386	0.047494219621487865
5275660	0.467526574942	0.0	0.0	0.0	0.0	1.0	0.0	1.0000000000006593	0.11496610532218447	0.686161146383	1.22807915782	108.03842347700001	0.4951419172210557	0.5191010858666826
5275434	0.0149932112562	0.028372468295900007	2.17807975403	43.3672033298	0.0	0.0206741573034	0.0	0.08015625651819525	0.0149932112562	1.4632318907558999	3.6369204009599994	144.3743113568	0.13628514194958688	0.20743962249576187
5276594	0.0691203360277	0.00025349098723400005	0.00443609227659	17.8762113634	0.0	0.0621046578493	0.0	0.10016477340444596	0.0691203360277	9.980435948500414	9.560325587607009	84.64451903193613	0.407928139035198	0.4084272445260557
5280022	0.0388414503064	1.7634709138999998	1.80733145706	132.853703397	0.0	0.07869151306460001	0.0	0.1045306250123724	0.0388414503064	7.023272156680001	11.223159618399999	787.008585883	0.14806369617211582	0.1826387865221256
5275472	0.12303872135800001	0.0		0.00240419873444	0.0	0.0	0.0		0.021402564493174518	4.555149393587059	3.5513124178139703	46.38791153622234	0.2275988000519752	0.2563523447352468
5279826	0.0452777932108	0.0		0.522178923635	0.0	0.0	0.0		0.04527779321079999	0.05680156696690001	0.0	2.139051398465	0.5293951650828006	0.0
5276620	0.0202366700882	0.0	0.00955754891038	99.9780343284	0.0	0.00945378151261	0.0	0.025446703774751687	0.0202366700882	13.842778516989698	20.125744911818682	329.847061489666	0.1368520859671902	0.16057882185169992
5279006	0.022853452290500002	0.561707328561		62.970254749	0.0	0.112113137938	0.0		0.022853452290500002	1.867994556091	0.0	131.7664573841	0.20363591996126792	0.0
5279842	0.020609268042099997	0.0		7.472529988350001	0.0	0.0	0.0		0.0206092680421	1.1317804457916922	0.8683502160486106	15.80715412262	0.08491418247539413	0.07322373058025611
5280178	0.0176007714309	0.42526014609	4.6646093979900005	30.4765722671	0.0	0.0500099621439	0.0	0.06684298521067453	0.02275341570575357	4.517848048876001	9.50850290814	326.1378363441	0.09173653768562792	0.11013980304969466
5275968	0.0460852747485	0.000231774814893	0.000231774814893	16.9222978904	0.0	0.00296735905045	0.0	0.0015266055793683876	0.0460852747485	1.2315035381176929	1.590824428013093	79.92703535895001	0.11881988414389835	0.11656154322052115
5275680	0.0226767252248	0.9001454992100001	1.7510117880900002	110.54336521299999	0.0	0.0375280898876	0.0	0.059730778097182136	0.020944912683275658	2.3388424779288	17.32151171269	349.13355173009995	0.12205475238387292	0.14191841664120014
5275942	0.0174017282178	0.0	0.521317788051	45.894323944499995	0.0	0.0	0.0	0.04169920300275011	0.0174017282178	2.41385023841235	4.296711344903351	102.63373435124336	0.3525699513382685	0.3476265867533316
5279736	0.0394679206987	7.81149465183e-05		0.0733609452182	0.0	0.0703564727955	0.0		0.011103977663795105	0.1026129252495183	0.0	5.314341938618201	0.21840365092669825	0.0
5279726	0.112269672686	0.0554970018657		0.0762324939642	0.0	0.426829268293	0.0		0.011406418328407102	1.3299570417464	0.0	8.840895101834901	0.4930589580274072	0.0
5275958	0.0312050309488	0.0500614604098	0.0518136429891	41.0315733803	0.0	0.103855721393	0.0	0.11045670962729386	0.0202708519340392	2.126714705253	2.0697829310954	107.7762196171	0.44785478547857255	0.4380249182696597
5279722	0.0031857357118099997	0.0		0.0661999665299	0.0	0.0253699788584	0.0		0.002357157832645559	1.6034584217984802	0.0	40.0750459367599	0.13049189899293598	0.0
5276518	0.126344577535	0.0	0.00161232717801	1.69368452503	0.0	0.0165289256198	0.0	0.17968897057647368	0.052126232635282085	4.071853344521204	3.4696823531872205	52.76259997316772	0.11340345199579133	0.10794335077099344
5279754	0.117086955304	0.0		0.0849511167035	0.0	0.0615384615385	0.0		0.033170232817389456	9.000441438274	0.0	154.4774696681035	0.2557328385900939	0.0
5278752	0.0166670773883	0.024230484566900003	0.0114151649686	0.920700004463	0.0	0.122076023392	0.0	0.11642964376204185	0.011918365739577734	2.0258346609079	3.0578506965326	174.77719582096302	0.12658551119438596	0.1306877998485425
5276392	0.137225668559	0.194396649467	0.47357947646	10.841836664	0.0	0.597765363128	0.0	0.6609654332072485	0.10775483609615392	1.7846452111859	3.2793549607818995	23.3830595816599	0.57553404026447	0.6404837063496042
5278742	0.0387153131186	0.00337058136574	0.00134933112349	1.00476134375	0.0	0.170588235294	0.0	0.0874636682792504	0.009179205000108987	2.0049747577067403	3.04778486268749	174.86125716025	0.12787941985023946	0.13184023658752755
5279822	0.009264673935879998	0.0	1.38387516954	33.3477548667	0.0	0.0179738562092	0.0	0.09528919769310157	0.009264673935879998	2.0258346609079	4.4417258660726	208.124950687663	0.10785487847837782	0.1245831307343108
5276136	0.030991675759799997	0.0	0.226637205924	630.8902929440001	0.0	0.0	0.0	0.011040193524105226	0.030991675759799997	9.6897616260579	11.70297396573	1050.2589657656238	0.10027230498185244	0.11158799248417606
5276280	0.5118298808730001	0.010140927232	0.0110007096737	0.0110007096737	0.0	0.914814814815	0.0	1.000000000002393	0.07547947208822907	3.33887783553	4.8873219886617	17.7487078054737	0.609124537607823	0.7169582250643217
5278944	0.0145333783404	24.12212504650001	23.644720133000003	388.28747999800004	0.0	0.0490958493395	0.0	0.03708712341655335	0.014533378340399998	76.86255178647001	51.598653825767	812.504674248	0.1744915620944622	0.1668666113991067
5279732	0.0291501263344	0.554918848939		7.813291735189999	0.0	0.185970636215	0.0		0.006838305623761005	11.161295800124481	0.0	245.25914864016	0.3355035809088052	0.0
5276524	0.150572846854	9.13945768843e-05	0.000456972884422	0.00941364141909	0.0	0.0963855421687	0.0	0.18261467718537566	0.03424142731443995	0.3897530114516623	0.542020106367612	6.54547817397216	0.4218061674006901	0.5078392781956034
5275634	0.006204419279699999	0.000723565462977	0.00144713092595	42.4672082928	0.0	0.00978792822186	0.0	0.027096261139551003	0.005327232826787691	0.26929954396647704	16.150412145955947	280.59327365490003	0.2133044107010333	0.26182000094623475
5275832	0.0768655770265	0.420880369376	0.418593259179	13.624256198800001	0.0	0.16743236345100002	0.0	0.1347033188268466	0.04770480900537393	10.71497415265272	10.180526854210722	81.09999658948473	0.5553672316385851	0.5155507877176452
5276312	0.00476914741357	0.0		24.026360131100002	0.0	0.0	0.0		0.00476914741357	0.24977635264797696	14.60288496364595	228.07855343970002	0.15546033838690612	0.1937297756472499
5276608	0.0305687042699	0.00104749403545	7.789226257389997	285.511225917	0.0	0.011200560027999998	0.0	0.03199347663510513	0.0305687042699	5.4416513208723485	13.146831682184999	622.4653069715	0.0779274245723766	0.0875689880486044
5276528	0.00198650588954	0.0	0.0	0.00643592642155	0.0	0.0	0.0	0.06944797089663	0.020768483807715624	9.605659239303687	12.77469749554384	287.5746590941845	0.11580882352973584	0.13106884552612394
5276074	0.0688601015087	0.0426105502993	0.0426105502993	0.0426105502993	0.0	1.0	0.0	1.0000000000023042	0.05079888318582905	1.9889005970313	2.0242038172483	32.00671724371929	0.6502901353962179	0.6530791289842732
5280164	0.012090400114899999	21.3447451911	37.4549032332	1759.64354408	0.0	0.0257382056794	0.0	0.051638895691802134	0.012090400114899999	21.531307130159	37.789474906808	2408.9469727467003	0.05041600283240245	0.08565468866698929
5276478	0.07526646517919999	1.09808477078	1.0975202655	12.2594560376	0.0	0.078431372549	0.0	0.07616715645082338	0.013401651744320509	2.094041862231	4.820814845859999	64.69870997289999	0.7105673620591325	0.6835122752569444
5275342	0.047292368894699996	1.3287913469	1.46731336243	50.022317676899995	0.0	0.0863693467337	0.0	0.0855994146970538	0.047449812956377145	7.230001982255683	8.07912101589584	86.8904780482324	0.22181906144165286	0.2265806342315529
5276086	0.0421457757382	0.0	4.56972884422e-05	0.00329020476784	0.0	0.0	0.0	0.06049051274975796	0.013088723290396414	0.3897530114516623	0.5422028955213811	6.548905470605327	0.4140850144090345	0.5000690275242021
5276336	0.012450838480400002	0.044647264090599985	0.0611511421739	26.5990750234	0.0	0.0525059665871	0.0	0.08423373183357882	0.012450838480400005	4.595182235615599	5.5185532879338	165.5511620676651	0.15066175738900967	0.16912106778450853
5280090	0.0254695166912	0.333003897336	0.567526068655	263.845422648	0.0	0.0493410648392	0.0	0.08709918746998224	0.0254695166912	7.972753549396	9.702038743775	350.34722306447014	0.14474447667944745	0.19536326801182968
5280010	0.024039675386600002	1.7286680023199998	4.68904947754	704.854966061	0.0	0.0190732758621	0.0	0.035041792810500086	0.024039675386600002	2.073367613472	5.022265631877	1043.681927744518	0.0658386521764227	0.07533029321991244
5276466	0.06603468362369999	0.0		4.44169503154	0.0	0.0135951661631	0.0		0.049405954918198484	0.311915252423407	0.31768738639629995	30.677801724454998	0.5605716141604155	0.549108622425303
5276168	0.014595935077799996	0.115847433626	0.100756197062	11.1106007214	0.0	0.098237720285	0.0	0.08342744505780374	0.007445314574026166	10.100433830499998	18.819284713787006	37.99552181237	0.5218236987471916	0.5580720663372922
5279156	0.0220667231434	6.11057586538	5.24113574657	346.95063269300005	0.0	0.0669923683622	0.0	0.07315807896127152	0.0220667231434	11.33945698836	10.65974067518	470.8902427926	0.1347919713959595	0.13568362427076408
5279998	0.0017660227841300004	0.000547817151528	0.0386211091827	70.3663735739	0.0	0.000734484024972	0.0	0.05081490083634905	0.0017660227841300004	0.959544239740528	1.0491355859559	98.35476411877	0.2691405934188968	0.29562858236660905
5276334	0.0628190169393	4.9876234227800005	3.5965606521300004	32.7442182751	0.0	0.10652726759	0.0	0.103789898271196	0.04843102136471472	9.55470127978	10.6909113609	142.16321801610002	0.12134336296671255	0.13942340881709978
5278856	0.483391234282	0.05680156696690001		1.61687247483	0.0	0.581525108493	0.0		0.4441172140260642	30.206527261188608	0.0	79.7242828062735	0.4976837742290183	0.0
5276600	0.0856050509138	0.0	0.0032603441068200004	13.517251003499998	0.0	0.0469798657718	0.0	0.1429952133144897	0.0856050509138	0.22474230620379	0.61529813446831	34.64033107803669	0.5432972047920142	0.5334340810782641
5275284	0.148711604665	0.0007728067976130001	0.00100320696583	0.08931505869989999	0.0	0.217391304348	0.0	0.3059883205176738	0.148711604665	3.733940083897613	3.9562570917658295	83.79062021695991	0.15068078668651255	0.18877446173619827
5278774	0.0334862936419	4.16417297088	2.08605583985	230.372348946	0.0	0.0908630084907	0.0	0.08593145764941168	0.026440723623347158	6.169147728586742	5.133840702537492	405.23360610625	0.11203904555316103	0.1121945655137384
5275230	0.0230177939194	0.288903054228	0.0128523356107	41.5759461918	0.0	0.0156219488381	0.0	0.013612827752256685	0.0230177939194	8.677972081156799	9.2483745463079	129.85498870268	0.11946416075195986	0.1254144080580511
5275940	0.07424924817	0.281081011402	0.264349998819	0.733044154011	0.0	0.399743754004	0.0	0.3780135076830627	0.07424924817	0.4193894633059059	0.39480704283767604	6.453985975730226	0.5643034209219453	0.5456999174880874
5278842	0.09704950753969999	1.96736436542		14.339742646	0.0	0.199395289624	0.0	2.452556842363005e-05	0.09704950753969999	2.0489956060368	0.0010761485828	14.95851325299	0.6132315521626148	0.19432548981448994
5275242	0.08184389677069999	0.0		18.002731578800002	0.0	0.0	0.0		0.08184389677069999	8.34395960322189	9.19105339855477	113.28814177627001	0.12904196119736075	0.13651041023475244
5276112	0.06518959229230001	0.286289634823	0.276524717046	9.99202754599	0.0	0.4984662576690001	0.0	0.4844524817912413	0.02637940413509129	2.232579681555	2.258117983995	41.95613423941	0.6302390024244259	0.6311538127773589
5276056	0.0146217219546	0.0	0.00290218892042	1.01717906096	0.0	0.0	0.0	0.0617516576698395	0.028990311611254524	4.071853344521204	3.474519334721254	57.42752778761293	0.1101097178684413	0.10810619813619517
5275658	0.0444064094305	2.4138624224500003	83.8111219966	1249.27723003	0.0	0.10449460781	0.0	0.14732488158526674	0.0444064094305	3.1000235688330005	85.03920115442	1357.315653507	0.27620704654168154	0.3107359522455264
5275738	0.990723568268	0.01966750664	0.01966750664	0.01966750664	0.0	1.0	0.0	1.0000000000050662	0.4801425889586566	15.662269132434002	6.5045968453470016	74.811551318534	0.6301675977650346	0.5906968915161837
5275382	0.016064724301	1.7812067957599995	2.1198804090900003	146.262440173	0.0	0.0460637806193	0.0	0.04583533503928579	0.016064724301	10.17249633972868	14.08955514117384	235.5142388280324	0.2302918748356784	0.2678590872513641
5275804	0.18406305756299998	0.995957091451	3.72329458036	52.439253935299995	0.0	0.293879056047	0.0	0.26902159749277604	0.07937937556189124	0.995957091451	3.72329458036	52.439253935299995	0.7201385452748722	0.6927080994209558
5278740	0.049191695616100005	0.326452173191	0.683524975284	104.810054063	0.0	0.127338468794	0.0	0.11259969241749122	0.035139981500345516	3.359022852531	7.133010885394	193.4386751654	0.2234897172236005	0.24653138435714936
5278930	0.102852670219	0.0118024822114		0.0118024822114	0.0	0.876404494382	0.0		0.012169290239606393	1.2643253568482802	0.0	11.6536212165484	0.4782740808267837	0.0
5279546	0.0183226027456	0.00456320242665	3.00210685964e-05	13.454649707	0.0	0.0320346320346	0.0	0.0007532605944235145	0.0183226027456	2.3527509367346497	1.835653538669596	74.77844975949999	0.07844990548193298	0.058653034616904375
5280170	0.009341072035799999	0.0252730044303	0.902379125211	66.1223052494	0.0	0.0858046658758	0.0	0.09822036681718026	0.01111129145802578	4.440804702031301	6.0761589312915	199.1847712722255	0.12662552347383754	0.12774883573542006
5275726	0.032548298963900005	1.53245870525	0.0249914568121	45.1918873095	0.0	0.0870090634441	0.0	0.04147362817477709	0.032548298963900005	17.1370739033385	6.4593755230583	119.99752089089	0.29278407520020444	0.2412122760483006
5275952	0.280310840731	0.000231774814893	0.00104298666702	0.00556259555742	0.0	0.0416666666667	0.0	0.1685019232520146	0.02754829174802655	1.2315035381176929	1.5916356398652198	63.010300064107426	0.12976313079301982	0.1283353678801723
5279834	0.0	0.0		0.0	0.0	0.0	0.0		0.0	1.597549687255	0.0	37.360269548527896	0.08582130659914639	0.0
5276508	0.028316361048099998	0.000463549629785	0.8672307918019999	66.5108720674	0.0	0.055935363579900005	0.0	0.09153818260207508	0.025110067802853176	1.231967087747478	2.45886643166722	129.52117213150743	0.1060409385921392	0.11651176905591698
5276116	0.0383451009846	0.0397461830289	10.144804949600001	1240.46585059	0.0	0.0114027149321	0.0	0.03972770017653623	0.0383451009846	0.8273753973918999	11.080390191481	1432.755141544	0.052289704449507333	0.0644598959324796
5276204	0.0362367324702	0.0235541982111	0.0211399731343	0.496884198481	0.0	0.0544	0.0	0.05562545903332215	0.014225423984589413	2.6261343084710003	2.7118322597105005	127.01281191278551	0.14135640352258794	0.1381358393265006
5278800	0.0160798229494	1.64721490783	0.000243002345087	347.802470682	0.0	0.014349608647	0.0	0.0002548435694552976	0.0160798229494	6.1412106332667395	2.771173148602577	683.9896350347499	0.08252476248223821	0.07128401505863853
5276140	0.00567045274996	0.0	0.424982034485	32.2304398187	0.0	0.0	0.0	0.0618332285841002	0.004167872210538422	12.698635322149999	10.346288944274	251.01389770900002	0.08931572629056654	0.08360634486503066
5275454	0.0144559537428	0.007258848978379999	0.0055773112108	31.241643138	0.0	0.017958950969200003	0.0	0.013514625908715522	0.0144559537428	4.35289975535038	5.9894228671645	85.6280883398737	0.17826284674870005	0.18778229705613889
5275886	0.006779951942779999	0.0	0.000630770344287	12.880402437599999	0.0	0.0	0.0	0.00209938166548988	0.006779951942779999	2.41385023841235	3.776024327196637	69.61981284434336	0.39416865011908425	0.38114693232650426
5275838	0.133319087694	0.00646402017446	0.0067175111617	0.0107733669574	0.0	0.639175257732	0.0	0.6766296238859791	0.07251210014078882	10.300557803451179	9.76865110619342	67.48651375764213	0.6652833428736368	0.6245526249622649
5276164	0.013017877160600001	0.35146290250100004	1.5736440903600002	97.62515532399999	0.0	0.0228230337079	0.0	0.053628692957099496	0.017808870030267734	1.9004939553305	3.5320938835111004	202.4538996013676	0.10666117574412533	0.1100241860190967
5278750	0.0076450961152499984	0.0280876756588	0.00495374482125	44.7433183936	0.0	0.031164069660900007	0.0	0.005846095674839428	0.017880208087228646	2.0330624333655405	3.0527386075087404	219.60457555384997	0.1049775719867097	0.10200527614712614
5279832	0.0149516582477	0.0		0.0285029996121	0.0	0.0	0.0		0.0149516582477	1.259267763922913	0.0	9.358545404432142	0.3353645499253448	0.0
5276618	0.0351970800635	0.0		14.712846173299999	0.0	0.0	0.0		0.0351970800635	0.57882324796819	0.5967642367755001	28.280757331079002	0.05177777777773535	0.0836858997843396
5279550	0.0163303401502	1.98918376928	2.13179040539	156.889244075	0.0	0.0491583023789	0.0	0.04815831032833123	0.0163303401502	5.432373525777869	7.74790272217321	241.29662915056647	0.17817378676021406	0.20263710233631665
5279540	0.043669138508099996	1.79355936659	2.5994490608	298.673396108	0.0	0.0640018221159	0.0	0.07327563687957964	0.043669138508099996	4.051191866185	5.099279848075	399.2978934605	0.09348104956270492	0.11174079860962424
5278888	0.008867703948049999	9.72430207185e-05		0.276171983882	0.0	0.0584795321637	0.0		0.011180137851193216	1.2593650069436315	0.0	9.606214388702043	0.3679410733078064	0.0
5276060	0.44735253871799996	0.418559884711	0.42743708269	0.584119627019	0.0	0.716565349544	0.0	0.7311255066754274	0.25965059100667226	1.946290046732	1.981593266949	31.96410669342	0.6470128855912626	0.6498280157845728
5278790	0.026480394347099995	7.25761168399	3.92310562867	514.479904015	0.0	0.0954013838712	0.0	0.055111998145694494	0.023459383841693902	34.283325370090004	20.69869185447	1343.936662059	0.2371779353278968	0.2379316113480484
5280004	0.08418202252689999	0.00999165291432	0.0141058629379	0.06465187179859999	0.0	0.0748299319728	0.0	0.13870624994451464	0.01221860902389494	4.45079635494562	6.0902647942294	199.2494231440241	0.1250000000001714	0.12809271700970207
5279714	0.0	0.0		0.0	0.0	0.0	0.0		0.0	1.6034584217984802	0.0	40.2656324861079	0.1005412156536815	0.0
5276104	0.142947214409	0.185089577863	0.149136926048	0.773226300371	0.0	0.473233404711	0.0	0.4021717998653634	0.050176306180803695	2.1739901748943	2.1733407432963	32.77994354409029	0.6356217846369494	0.6322925895664036
5276110	0.01339616769	8.6274269085	6.0363212934	133.268360181	0.0	0.07527755212560001	0.0	0.05485852577363685	0.01455452576172096	12.698635322149999	9.50213406136	184.3224422191	0.1019009321879576	0.08902565466799901
5275978	0.101989683344	0.017680518154500002	0.0206997514615	0.0565567001686	0.0	0.12656784492599998	0.0	0.17095045737764927	0.101989683344	0.200366903263846	0.192059701315726	5.819141923226527	0.4874767581755105	0.4721924785559808
5276200	0.000946793461253	0.0		12.079486443399999	0.0	0.0	0.0		0.000946793461253	1.728868047763	1.725306426354	49.03670652338001	0.4174045579908616	0.41334697192351466
5276610	0.0215468165153	0.0	5.35446544597	121.769005548	0.0	0.0	0.0	0.0636123729886284	0.0215468165153	9.605659239303687	19.07279234654684	454.88229599075447	0.10563759191755444	0.12462393079837378
5275706	0.21106649076099998	0.686161146383	1.22807915782	108.03842347700001	0.0	0.478710798641	0.0	0.5034497427413805	0.21915015342510924	1.0051414254635	1.551685890875	125.8705894607198	0.5416187629338004	0.5572778846734251
5276182	0.027171278934	0.0017422902165	0.018947406104400003	90.58689158690001	0.0	0.00263504611331	0.0	0.028096542209605738	0.027171278934	2.8065287039575	2.4782472637424	599.1843532427	0.06382001836554188	0.0774079956641131
5276006	0.133136074105	3.67880978881	3.69850724324	25.1328067306	0.0	0.266716196137	0.0	0.2303625469393729	0.06203721708072001	13.022210361268	21.98684013771	379.9693135072	0.4858016943835689	0.5395657221344133
5275938	0.0076888777406600006	0.0	0.0236206429545	15.601004689200002	0.0	0.0	0.0	0.06631075874634572	0.0076888777406600006	2.9680338012903498	3.5794597597968503	72.01298594094335	0.40615848788719866	0.396156774290216
5276172	0.0037546970079699996	0.00966433418216	0.0143594677211	19.9046114195	0.0	0.0143129770992	0.0	0.0351730596284234	0.0037546970079699996	0.7145138537161599	0.7183212674571	30.480758592508998	0.34414758269724416	0.3536068566628109
5276070	0.00554149253579	0.0	0.562167892262	36.5956735988	0.0	0.0	0.0	0.051434352674102735	0.01767154005221432	9.605659239303687	13.71832690057684	333.11329044275453	0.11123701605319064	0.12785790824098034
1151677	0.012257500737999999	2.30099996472	2.64736959498	53.6397201096	0.0	0.175904495066	0.0	0.2113027933460581	0.010600056189796793	12.5694129316006	13.895909997289099	182.92978113115242	0.2869595058335845	0.34785120418386045
1159211	0.112666446633	0.0	0.0	0.0332066053525	0.0	0.4954954954950001	0.0	0.7173769946114035	0.009919375474974398	0.0199215916	0.0141877017668	0.0624641457835	0.5152259332024304	0.4834099987994819
1150571	0.0898259922539	1.6304254314500002	0.180938872916	21.0657125481	0.0	0.177159266622	0.0	0.14802447966074225	0.07777512453793484	4.092921721434	3.599761794617	266.4688711708	0.2721528984359471	0.2732762991690153
1150053	0.134742178765	5.00020336242	5.00862229529	16.8086949285	0.0	0.27785638486	0.0	0.2812804694403776	0.046196822409800976	5.556128612946	5.522661708871	28.428266611599998	0.3717494743828759	0.3663001997965648
1151509	1.0	0.0273058758321	0.0273058758321	0.0273058758321	0.0	1.0	0.0	1.0000000000043738	0.29011928699189626	0.64876747597729	0.6506187217962901	1.0761311848942898	0.3729773462784811	0.3767095397991017
1158005	0.021935178508500002	386.594837935	538.8845603980001	16730.3743033	0.0	0.100114691628	0.0	0.11552481270947305	0.024340460730430964	386.629092526912	539.4182410208148	17291.451710254998	0.12546804177933074	0.14211829448889715
1151759	0.0147455251989	0.000266921531875	0.006406116764989999	4.57043418899	0.0	0.0005552470849530001	0.0	0.013290319780714184	0.0147455251989	9.639557220341873	8.468322351064991	24.53657464078	0.2843983322021997	0.3104979357231821
1150273	0.00553173537101	7.34326968086e-05		7.88409528666	0.0	0.000584795321637	0.0		0.00553173537101	0.0002937307872346	0.006608942712770001	8.22419198334	0.11964908572021968	0.12570872893208926
1158933	0.0792434937462	0.0138889924856	0.0138889924856	0.0138889924856	0.0	0.15099009901	0.0	0.15106746163821222	0.4873789176290535	1.7768406665126997	0.2906004581597	5.5581438368527	0.6527570789867839	0.5095470123719827
1150513	0.616408866884	8.6417356215e-05	0.0	0.15306270958499998	0.0	0.862724392819	0.0	0.8990908704056884	0.19489227012011964	2.2826951710682137	2.290757554585	2.4438202641699998	0.9274737125907948	0.9484696027739652
1157805	0.0370114011345	0.351367578172	0.272262922372	57.0115321142	0.0	0.123232995177	0.0	0.09420629712182944	0.028358371777764825	0.4379978673238301	0.35729083561479	62.64985073853535	0.15072463768118258	0.13244641747527494
1157503	0.0614399640405	0.7461920419149999		18.5085082134	0.0	0.278745644599	0.0		0.05863473442633744	2.497118451605	0.0	109.3729811172	0.2253948494511453	0.0
1159045	0.015959644398900002	0.250384655898	0.160595966066	25.0331911369	0.0	0.21060965954100005	0.0	0.1411661542818988	0.025910702329897683	11.325468274525	11.321283916478	125.82300856183001	0.3443865137299265	0.2814003673873401
1149941	0.870778118739	0.103639075154	0.103639075154	0.103639075154	0.0	1.0	0.0	0.9808937033046841	0.4734322572410118	1.9233988955058297	1.91632480408703	13.782192899059632	0.5973912090320338	0.6068261319499246
5279332	0.026218066439299997	0.558116741508		3.15129335038	0.0	0.366759517177	0.0		0.026218066439299997	8.0046751258382	0.0	60.463887531980006	0.4131610819536543	0.0
1150271	0.0467980706826	0.0	0.0	1.2407705080299998	0.0	0.343235944022	0.0	0.38064915734992494	0.0467980706826	5.925774550070001	5.9321125062999975	7.172883014329997	0.5850673194616429	0.6140422746951157
1150259	0.301497983923	0.0	0.0	0.0	0.0	0.977371627502	0.0	0.9999999999994	0.13938767175342032	6.2487902643740005	6.263277021476999	6.263277021476999	0.9841089670827976	0.9999980411402029
1150541	0.0	0.0130597322277	0.0120302270952	7.24383219209	0.0	0.584278768233	0.0	0.6066416840262	0.0066936225973929005	0.6298555147877	0.8341693974866999	122.22508775238998	0.2882332761579157	0.315146598335415
1157811	0.0166240263138	10.734984818300001	8.58427857587	268.367763457	0.0	0.120207805214	0.0	0.10088371323981006	0.01441845467320896	11.914324687581999	9.654112988804	276.79698046953996	0.1766569844204499	0.1343697275635161
5279204	0.0101245331445	0.105459825398		68.2275533711	0.0	0.0388776820099	0.0		0.0101245331445	7.309436973608001	0.0	341.2242622181	0.11947578940518645	0.0
1148519	0.00281865317006	5.70716782263	27.4807812421	88.01080244190003	0.0	0.27897574124	0.0	0.3522350188020821	0.0030123181840803373	11.18469493766	34.21483938075	217.48286081990003	0.2600735529256949	0.30144321724099205
1157525	0.0752235592403	0.058876088111	0.0398438352313	18.5936005673	0.0	0.188598203827	0.0	0.1569936337915529	0.16540016122168774	4.9562472868933	4.09512836948911	91.68282737228228	0.3186023252906292	0.14046977950663486
1158929	0.0585870656057	3.99060507007		35.6572680393	0.0	0.210173621687	0.0		0.013382284967217342	4.649254382722	0.0	63.375067521979005	0.2622356123954199	0.0
1159691	0.00202462885024	0.0	0.0	0.0	0.0	0.158787878788	0.0	0.11101080054152812	0.01886429488782339	8.78143824419	10.382532055029998	43.78822694344	0.2826268126005343	0.30482197206885964
1151953	0.0	0.00553192739608	0.00414894554706	2.76846317691	0.0	0.150485436893	0.0	0.11565912137699676	0.00787988287100813	0.13800988977178	0.10349695721376	94.6295881232	0.2692648361380633	0.2805169522740586
1150551	0.312290663437	0.0651625743703	0.0634724787815	0.350806197879	0.0	0.440322016101	0.0	0.43403613473130814	0.22975408637959824	5.2311661691099	5.2591366277870994	5.6645608143666	0.6375646180355147	0.6659374586029512
1148491	0.009062742360229999	3.79555082181	9.63701675553	391.509900631	0.0	0.28050133096700003	0.0	0.2968996322413172	0.009949681805893264	60.3201364354109	163.9554417672951	1063.597619258204	0.2814460454322149	0.3275613473848929
1158475	0.005656484405310001	0.038255385909		10.156074158600001	0.0	0.127774615822	0.0		0.006056109096751094	1.277486892329	0.0	33.7376986881	0.1969858914061544	0.0
1158993	0.146895355729	2.4087121537900003	1.55633508868	126.595862023	0.0	0.3095684803	0.0	0.2501390273739142	0.0728112467182167	48.19388476521	5.08104356104	272.4139138902	0.3759047396684486	0.2792145616009114
1151785	0.000654600558875	7.38469025237e-05		0.0835577702055	0.0	0.0012698412698399998	0.0		0.000654600558875	0.0004430814151417	0.000184617256309	0.1021302661902	0.13079768566856398	0.14097000391981784
1159097	0.23766021376999996	2.45321597415		6.740747785730001	0.0	0.590141796084	0.0		0.044008464917166285	4.6481407939	0.0	9.86194650692	0.3842975206610056	0.0
1148489	0.0239420009568	16.1958875214	10.769254115399999	149.996745645	0.0	0.408566721582	0.0	0.390610428717072	0.037547625773134606	16.676492933500302	16.783109901204398	182.03288876478697	0.504097017371625	0.5249225318454891
1160727	0.16956332671500002	0.0		0.0	0.0	0.190476190476	0.0		0.009287170749923692	1.2823453957100002	1.9859840234274	74.0479763072	0.08486853872292495	0.08804282005261617
1157717	0.0205313638275	0.032598928723	0.031107474467700007	18.914728145999998	0.0	0.327540106952	0.0	0.3377187676799169	0.014566854159663476	39.361293498223	41.49092410996771	462.537682406	0.21067991796813884	0.1758552672919106
5279228	0.0104745368905	0.0812919863965		64.3461831553	0.0	0.0227992400253	0.0		0.0104745368905	2.8245494844165	0.0	131.6018763089	0.18500174398293487	0.0
1151763	0.0	0.00234541622922		11.207899633599999	0.0	0.000918062887308	0.0		0.0	1.51754700520322	1.5546648849259999	34.493857332321	0.12994626282351207	0.1226386155297799
5280732	0.00647877098675	0.910091239144		58.200477911499995	0.0	0.0665173572228	0.0		0.0072029538569057345	22.520794952209762	0.0	149.41264566450002	0.1355542791499621	0.0
1152271	0.660754747568	1.03491035791	1.03491035791	1.03491035791	0.0	1.0	0.0	0.9999974630822208	0.7095620010473459	9.56648696808	9.85798748071	83.96730181570999	0.6415921288012317	0.6649992533312505
1149965	0.412916262307	1.23500239763	1.26875417777	1.59595267974	0.0	0.867957746479	0.0	0.8937693222435084	0.2477845163808282	3.0475475820366	3.0742252707578	15.267291867700402	0.5613809245171816	0.5753900912148653
1151783	0.010804284466899999	0.00231977034855	0.0030343448452199995	9.86827166606	0.0	0.0069018404908	0.0	0.011418505845565596	0.010804284466899999	0.05780385733675001	1.04149025433522	40.25235670474	0.12516223231693865	0.12459365849480815
1151761	0.0009399401630410001	0.0498400948709	0.0996801897418	6.92545934245	0.0	0.0210396039604	0.0	0.0426806038358552	0.0009399401630410002	1.3867900504239	1.5411787416078002	29.47670802524	0.12402751155694318	0.13818909624605802
1158939	0.7161930282979999	0.17251168377700002	0.17251168377700002	0.17251168377700002	0.0	1.0	0.0	0.9999938283213358	0.14811292378797533	2.196727784556	2.1773951768160003	3.1364807844060003	0.8773148148146783	0.8553152577653471
5280736	0.00760765214238	1.4236839287399998		28.464215063	0.0	0.06618705035969999	0.0		0.00760765214238	23.041843611999198	0.0	84.25245138422139	0.1341079332653645	0.0
1148515	0.0122338259661	45.2576687579	119.91745575600001	453.99361665199996	0.0	0.25747871909200004	0.0	0.3310860004582235	0.009805613348679031	56.44236369556	154.13229513675	671.4764774718999	0.2587851708728581	0.316161396647044
1157349	0.0005651106857999999	0.0		0.5789270463539999	0.0	0.0	0.0		0.0005651106857999999	0.143979656175	0.0516966824362	71.051757008754	0.04484842171061739	0.03156004808030124
5280680	0.019872712696599997	0.00502705427425		0.011679772866	0.0	0.373831775701	0.0		0.009579135485847864	0.64484668873094	0.0	14.640919090236	0.24843330349160184	0.0
1157987	0.0205955643138	2.08598621716		25.766630907399996	0.0	0.284186046512	0.0		0.012400520260766624	3.2239580113779995	0.0	45.28742993718999	0.3020398425384696	0.0
1148477	0.6746428109479999	0.0146708424145	0.0146708424145	0.0146708424145	0.0	1.0	0.0	0.999048879172274	0.03997959221313094	25.713999674324498	38.22177283864451	629.8955502804145	0.3051814988289485	0.3244146843632613
1158469	0.00603343082884	0.0324187366641		55.6038070503	0.0	0.0119236883943	0.0		0.00603343082884	3.3307563187831004	0.0	142.58218786950002	0.12616094606264053	0.0
1153779	0.0	0.00190776854288	5.5073812898500005	5.932252012080001	0.0	0.6389937106920001	0.0	0.6887590649595007	0.006619551494367922	3.49285737361288	7.423638390960001	169.71668299607995	0.3275175644025141	0.3235586851739289
1157491	0.0141240162586	5.89475184286	16.282264817	189.724941274	0.0	0.0277429248571	0.0	0.09152723936363122	0.0141240162586	11.828158997118999	22.063874370013004	909.3694472617999	0.11810064935040746	0.13003941532291455
5279190	0.00850617807681	0.428169880644		13.780288988099999	0.0	0.044483593922	0.0		0.00850617807681	6.428986129544	0.0	165.2632759411	0.1258314685955259	0.0
5279148	0.022294047227900002	1.69955660694		9.02542526962	0.0	0.385796545106	0.0		0.02490289749376695	1.903933163094	0.0	13.70682590569	0.3194204152252435	0.0
1151701	0.194244100732	0.668850748858	0.859936559515	4.42926697247	0.0	0.276736493936	0.0	0.34752042877279593	0.194244100732	16.46142651766044	10.04813663995744	72.90590310065944	0.5333261432267661	0.5366477087093376
1152269	0.7693428514990001	8.14580025908	8.14580025908	8.14580025908	0.0	1.0	0.0	0.999995693954364	0.2731176059795008	17.712287227159997	18.00378773979	92.11310207479	0.6727109368616982	0.6940853610158353
1157735	0.0073631684377200015	3.747892743630002	1.16371286072	122.451601412	0.0	0.0704625371923	0.0	0.035591877675760795	0.0073631684377200015	4.180126679899401	1.485466722423	185.61923324	0.09808008776735133	0.06457356254962746
1150523	0.24333153417800002	0.0	0.0	0.0	0.0	1.0	0.0	0.9999999999982706	0.020359405212071347	7.941853016009801	2.08452267272022	241.22094414974003	0.2643202448439249	0.2626969665831741
1160607	0.0697430837725	0.203388446476	0.275129052228	35.129822066500004	0.0	0.08376353039130001	0.0	0.11092013633748153	0.06518128660909399	7.2793258510327	8.8555687536711	217.717355881936	0.17341314526142698	0.2118308645010416
1151751	0.0303430023378	0.0047466619871600006	0.673921400914	31.126362530500003	0.0	0.00369685767098	0.0	0.045740937075657455	0.0303430023378	2.87840933370948	3.5527262897894003	34.8446109574826	0.3515559293522655	0.3767737282997854
1148521	0.00144085706305	3.23078426314	25.006077130999998	34.4694932795	0.0	0.52773925104	0.0	0.6183277912135468	0.0006426922708173291	6.7236416367528795	32.42971552196	204.18617627557998	0.3564415948704819	0.36614103850083024
1150221	0.0017697023954899999	0.0	0.0	0.206766006533	0.0	0.0460667173147	0.0	0.06368725817750898	0.0017697023954899999	0.0261622045655	0.0261622045655	0.2329282110985	0.10139462809924234	0.11055427842257687
1151765	0.00778727382325	1.7756086370500002	1.3669856855700002	60.1244166669	0.0	0.12862726519	0.0	0.10566322386271597	0.004919412861182174	13.57514172168	9.168340508700002	117.9419880566	0.19874804381821493	0.1894348708173816
1148387	0.0811777790372	2.45258010487	1.66801491688	277.434166469	0.0	0.135208616543	0.0	0.14943378737051324	0.0811777790372	2.6670346493454002	1.9129445808335	277.831471730343	0.19918131919253607	0.217339369189061
1150325	0.588604054147	0.140330957831	0.140330957831	0.140330957831	0.0	1.0	0.0	0.9999999999983258	0.12834206224020933	0.16806503705820006	0.16806503705820006	0.16806503705820006	1.0	0.9999999999989084
1151951	0.0547756245699	0.0312240463682	0.0179774812423	5.71489971376	0.0	0.509915014164	0.0	0.4677070043552939	0.028238795556348024	2.0766659312681	0.2029767625718	177.60930789166	0.2903543769067067	0.29727087879785585
1148479	0.266441754014	0.256180293043	0.226898073452	4.74702759401	0.0	0.415540540541	0.0	0.4096452340822599	0.12644180277950834	25.955509124953004	38.434000069682	634.62790703201	0.3110163077134219	0.3287430248408682
1151799	0.484776526533	0.0	0.0	0.0	0.0	0.8	0.0	0.3852950890256008	0.15329081934694738	0.24873743657420005	0.7101860942232999	25.739798067855002	0.1559977259807444	0.2036300394394029
1158941	0.546074756967	0.582428685942	1.0070262826799998	5.02320286963	0.0	0.907657657658	0.0	0.9208011384591822	0.13132645519148728	2.779156470498	3.184421459496	8.159683654036003	0.8824884792626179	0.8664810530910239
1148295	0.0224611251859	0.120984391746	1.65902895466	60.192981905699995	0.0	0.0279886685552	0.0	0.053996424788999	0.0224611251859	0.782518580818	2.3487795840790002	96.45822873384	0.12959267519664827	0.14603934172587882
5279112	0.0148391365808	27.77979823		453.939924904	0.0	0.304598794799	0.0		0.0148391365808	56.311054050299994	0.0	554.51628392	0.3872998980093398	0.0
1152231	0.8174434381929999	0.208384432364	0.208384432364	0.208384432364	0.0	1.0	0.0	1.0000000000010487	0.10087881426971833	0.3764494694222	0.3764494694222	0.3764494694222	1.0	1.000000000000092
1149711	0.224890683968	0.0104080154561	0.0	0.381311838981	0.0	0.414824447334	0.0	0.3557549575181723	0.020034753614172045	7.9522610314659	2.08452267272022	241.60225598872105	0.2682406341032863	0.2651209756282596
5280738	0.00104621431479	0.0		1.74942911323	0.0	0.0	0.0		0.012279055136725756	0.910091239144	0.0	59.949907024729995	0.06037198902323448	0.0
1157687	0.0119197851248	13.6717274179	8.25841616634	154.81559887	0.0	0.175929839391	0.0	0.19509986867916115	0.011679131884139186	32.6327421256	45.61998314014	1146.5202857069999	0.1790131607906991	0.18268548282129185
1151773	0.00225925503614	0.00458348414395	0.0336122170556	11.265598161700002	0.0	0.004848484848479999	0.0	0.035060088151913665	0.00225925503614	11.98246398930295	8.034184072943601	73.17293093695	0.2153120011102916	0.2236661751587448
1159017	0.17056505564899999	0.119224431946		0.8701424257960001	0.0	0.244554455446	0.0		0.19980482501625133	11.555197916846002	0.0	146.452836651796	0.20266811448050945	0.0
1148511	0.00236783675012	30.789248301500002	31.5185320786	264.345968582	0.0	0.331458699473	0.0	0.3583495547695648	0.0061520389847015185	87.23161199706	185.65082721535	935.8224460539	0.2662525281708718	0.3204963182686336
1157535	0.0104250430215	0.806965319498	0.8204307107369999	385.769842041	0.0	0.0833092694196	0.0	0.08989793371872833	0.010915614214374295	1.713578374489	1.702866053572	463.37179812309995	0.1271573604059854	0.1363308397391793
1158865	0.24541315835000002	0.00941791351943	0.00701333985489	0.017232777929200003	0.0	0.400809716599	0.0	0.3973185996687733	0.04167058057595209	0.08663028915182999	0.08502791324279	5.6377174809192	0.1789658194567872	0.17202424727921636
1159155	0.0028744013081999998	1.23923150642		23.581624529499997	0.0	0.238616912016	0.0		0.00468544786965018	3.913561976268	0.0	54.13209995994001	0.25960755275822944	0.0
1157569	0.0510591941532	0.906613054991	0.882435342835	77.6019560821	0.0	0.189211279117	0.0	0.20204279460179544	0.02724936921765396	12.452546098891005	8.347672676624999	142.5665307553	0.24013005109141275	0.2564923010361443
1159355	0.136841292543	0.283850375039		1.43238367834	0.0	0.287136844267	0.0		0.10270507799506053	1.20146953217	0.0	4.039799934106	0.4762946754196794	0.0
1150573	0.120611404619	0.0367479942506	0.0265495930798	0.229484591051	0.0	0.4851694915250001	0.0	0.4549273936628842	0.040461072686911584	2.4992442842346	3.4453725147808	245.63264321375087	0.3076717097332943	0.3169738693601425
5279118	0.949509898713	0.0		0.0	0.0	1.0	0.0		0.0737277410298648	12.408013209773	0.0	869.6700341919327	0.18403755868547872	0.0
1160609	0.08430152284710002	0.156180479273	0.163404686464	5.22573018732	0.0	0.421956684093	0.0	0.4306526425641165	0.09463913224293036	1.7405356340154	1.5650657055964003	120.9301603279824	0.35636092220897336	0.31888087174634816
1150609	0.19532669185899998	1.10409258329	1.06397964636	8.44994098885	0.0	0.448188904172	0.0	0.4535337303842469	0.10303505769551767	1.873250175111	1.869055505807	13.779179066754002	0.5528922345481349	0.5723865844471375
1157429	0.012217614476100001	0.983354841199		49.923133383199996	0.0	0.141765778279	0.0		0.011056298711301408	3.069341058359	0.0	75.68976429060001	0.1928877511268408	0.0
1157445	0.043858641710400006	10.7784402452	3.2482013967400003	237.42578280599997	0.0	0.0885186030587	0.0	0.061334807890756265	0.04736762027564366	13.53481307434	5.441643303504001	344.1922320536	0.12268355100617835	0.10072527872798162
1150539	0.00045165380591100004	1.90236907417	0.0787578322925	57.4301158137	0.0	0.398498805868	0.0	0.3931234322581022	0.02480920912553145	2.51916485673	0.900897002684	172.41137137400003	0.2868674425390744	0.31089481256969925
1157779	0.038893832226499996	39.3286945695	41.459816635500005	443.62295426	0.0	0.207127763329	0.0	0.17093516414292534	0.03835214085710214	58.9907668582	45.03695157611802	719.1117878942401	0.22727655986498474	0.1687600954201239
1150575	0.0163135276181	0.115500820044	0.13314901723099998	13.0401091757	0.0	0.400894383796	0.0	0.40614790312412746	0.03493642455637405	2.462496289984	3.4188229217010004	245.4031586227	0.3018802709799633	0.3124726898031887
1159229	0.225969197428	0.0	0.0	0.0	0.0	1.0	0.0	0.999999999981168	0.015587659313289962	0.028881565529450006	0.02142460378674	0.181921711614	0.4156152861587808	0.3790535988129437
1151947	8.918590043189999e-06	0.0698101177768	0.07966876441060003	4.52429138406	0.0	0.0392811888031	0.0	0.04135369001539902	8.918590043189999e-06	0.14295842654250002	1.1326461813741002	36.0318164784	0.10782850890298214	0.1086862934314471
1160577	0.0	0.0		0.0	0.0	0.0106024096386	0.0		0.0	1.2823453957100002	1.9859840234274	74.0479763072	0.06147629310342305	0.053043901607131135
5279158	0.200024058043	0.0328391109579		0.0383687207068	0.0	0.723308270677	0.0		0.200024058043	1.6913648827379	0.0	13.0930214672068	0.7762146482962153	0.0
5279128	0.0563858506917	28.531255820300004		100.576359016	0.0	0.579428234601	0.0		0.029265106032667236	28.627112317873998	0.0	124.82460166892041	0.6690808670282226	0.0
1151973	7.51792668792e-05	0.0	0.0	0.0	0.0	1.0	0.0	0.9999999999975054	7.51792668792e-05	0.1681775111939	0.1924447359636	0.32168181671240004	0.7536101083031869	0.7947696120923975
1157395	0.0160298456949	0.143979656175	0.0516966824362	70.4728299624	0.0	0.0513172010967	0.0	0.03611215896087872	0.01408044165687406	0.15078666845475	0.05968752293852	120.5825672	0.06859997563057878	0.05544893142374418
1150301	0.975502256227	0.383244045763	0.383244045763	0.383244045763	0.0	1.0	0.0	0.9999954635221512	0.29453771887692404	1.7401630371139998	1.726766309127	1.7576785002429998	0.9171961467515408	0.8533275194095797
1151739	0.00801148902964	0.756719686091	1.3809616724	23.541852735	0.0	0.043250950570300005	0.0	0.12646828616311487	0.00801148902964	3.559141945137	4.190484305257	47.11928844526	0.1903467666354332	0.22117972666572933
1151747	0.0052684874682299996	0.19431601814	0.133707872243	119.05735125	0.0	0.0668271435122	0.0	0.056788253137267625	0.005268487468229998	2.3317108758460003	2.33943777834	161.45867835709998	0.13476912063002572	0.13022289312099114
1150297	0.9643264023729999	0.0162976017455	0.0162976017455	0.0162976017455	0.0	1.0	0.0	0.9999956113093	0.0586158729774274	1.1201529987965	1.1201529987965	1.1201529987965	1.0	0.999997720145977
1158947	0.09820135570350001	0.0429185898829	0.039469139534	4.86117752227	0.0	0.17860906217099998	0.0	0.15337449336302772	0.10809751944455777	2.472817005282502	1.8254283062236016	36.1406785326796	0.2122936634719964	0.12518138008030374
5279166	0.0	0.0		0.00166741841531	0.0	0.0	0.0		0.02564181502957978	4.547898656110379	0.0	15.608105856800213	0.5808260138294133	0.0
1152355	0.787246512604	6.98532802018	6.98532802018	6.98532802018	0.0	1.0	0.0	0.9999919327724476	0.4012558363101085	37.73906071587799	39.956624332176	337.95740701821603	0.4565235173824627	0.4338235105171368
5279080	0.0182970287302	0.384773419762		81.9558731799	0.0	0.0908908507223	0.0		0.0182970287302	1.308363385498	0.0	84.87094850106	0.6642587601078179	0.0
1152351	0.111238286108	27.9745762252	29.7868748525	322.81239534400004	0.0	0.308606959747	0.0	0.2828820133461634	0.2619213662091426	30.753732695697998	32.971296311996	330.972078998036	0.4355619743437776	0.4119867537671657
1158923	0.345661936043	0.5806905722569999	0.476729091388	2.20034601013	0.0	0.423057892133	0.0	0.3692526985658161	0.4187342849319272	2.4168596811364	0.8266579919144001	7.817818289349399	0.4812951614381476	0.4159259372714375
1159233	0.0883117447229	0.0199215916	0.0141877017668	0.029257540431	0.0	0.511363636364	0.0	0.4015430152907066	0.02023342398319134	0.028881565529450006	0.02142460378674	0.181921711614	0.3545480146441245	0.3152931502114659
1159029	0.058152736745199995	10.2031544079	10.3177119357	99.42911594440001	0.0	0.318937744885	0.0	0.250644980806546	0.027662265508282137	22.082651117114	13.050782354526	204.593049842771	0.4781355650392655	0.3612815585569134
1152267	0.988047404502	0.0629049965646	0.0629049965646	0.0629049965646	0.0	1.0	0.0	1.0000000000043359	0.5633734036930518	8.594481606734599	8.885982119364598	82.99529645436459	0.6015710450430318	0.6275922198778071
5280716	0.007901770473050001	0.0365164735267		6.354673976240001	0.0	0.08049376366210001	0.0		0.010460721828866358	0.7006871986673	0.0	19.239723099616498	0.16855787084804175	0.0
1160733	0.00122126527784	0.00240806906368	0.00240806906368	0.00240806906368	0.0	1.0	0.0	0.9999999999671372	0.0945593285639695	1.58332312514368	1.4006289895336803	115.70339811106369	0.3479234717681077	0.30465904462191595
5279238	0.006061470854890001	2.50838248811		68.85132074100001	0.0	0.230551009274	0.0		0.006061470854890001	6.726546714700001	0.0	93.79846446260001	0.3607947996866025	0.0
1159189	0.123377921842	0.5490977313600001		9.81421633859	0.0	0.42497598463	0.0		0.05274979246037613	2.632990693122	0.0	22.010714171999997	0.4710081352689102	0.0
1160723	0.07133569788939999	0.0		0.0	0.0	0.108288770053	0.0		0.007467626336062534	1.2823453957100002	1.9859840234274	74.0479763072	0.08679494590794919	0.08130273464599504
1157789	0.167716040078	1.0711739206	0.808338049668	1.8108518002400005	0.0	0.31119635579	0.0	0.22341939360578053	0.057564301282012925	19.6620722887	3.5771349406180004	275.48883363424005	0.2489926419058709	0.1664158377497185
1151563	0.979900112912	0.006729467473630001	0.006729467473630001	0.006729467473630001	0.0	1.0	0.0	0.9999999999993424	0.8736884873152699	25.36639823405523	5.514928693981631	160.0371961642746	0.351321450522222	0.3744740717894064
5279140	0.0163227744838	0.413046559639		95.2423114785	0.0	0.10813815006	0.0		0.01210993863785767	0.628236469056	0.0	118.93167752961	0.1633727929377937	0.0
1159043	0.130127652698	0.8719292107269999	0.842976014712	1.36070148053	0.0	0.626145387905	0.0	0.6053719165825712	0.08040551666980576	11.075083618627	11.160687950412	100.78981742493	0.35726261240700424	0.29489799055089544
1150549	0.873607044666	0.0467421189096	0.0467421189096	0.0467421189096	0.0	1.0	0.0	0.999999999998438	0.4003409426684129	1.8125451844066	1.8054710929878	13.6713391879604	0.5395512097278733	0.5527199892687364
5279596	0.0137930694406	0.850108183433		30.6670970254	0.0	0.128039565874	0.0		0.02121412181730459	2.3583559046141005	0.0	106.75015469978813	0.1868542536820356	0.0
1151731	0.00539920666189	0.0132266386645	0.0337065953063	10.9103227607	0.0	0.00825126430663	0.0	0.020830979145540225	0.00539920666189	3.2924549840704005	5.4193908847544	35.16915969635	0.3061155344740113	0.3230091298663661
1150035	0.0851014999572	4.65489835318	3.45055536812	14.8813201609	0.0	0.250793650794	0.0	0.26220349052492864	0.05217669534769024	10.195215549336	8.975955647881	31.585712134890002	0.4222988866237491	0.42781054394282897
1150607	0.518533202974	0.647117565495	0.680344199405	5.15987537509	0.0	0.5966145001600001	0.0	0.6238028329594564	0.3080072667336639	5.8131211602346005	5.8760083484106	10.4736299915776	0.6860452166165006	0.7250329669459183
1158123	0.0329311964389	0.751917699352		7.6381009089499985	0.0	0.175384615385	0.0		0.020085741392734703	36.063460084252	0.0	2208.83729067895	0.10104186764423212	0.0
1152283	0.0659258905424	1.82093744697	1.6714741515	117.875939581	0.0	0.174255540166	0.0	0.17366276020885166	0.0659258905424	11.38742441505	11.52946163221	201.84324139671003	0.4040999472107779	0.4153107451247596
1151803	0.009825583360180001	0.00214241514914	0.0050882359792	0.0208885477041	0.0	0.0919540229885	0.0	0.25030032884096204	0.03540766016676517	0.18124950898394	0.5936709522535	25.334633349984106	0.15061765143618866	0.181065129243292
1151565	0.209646231399	0.0154381900866	0.016342992436	0.0279923226844	0.0	0.615120274914	0.0	0.6413417682213782	0.04631850300688767	25.3751069566682	5.524542218944	160.05845901948538	0.3600511865982112	0.3837374922186764
1157475	0.044477039832	0.391779752303		1.01229081639	0.0	0.487104337632	0.0		0.09697719980007764	2.888898203908	0.0	110.38527193358999	0.2416824748282261	0.0
1159159	0.012575031837599998	0.156674982019		6.3104070855	0.0	0.183853859753	0.0		0.004474494636297689	2.674330469848	0.0	30.550475430440002	0.2756100743837161	0.0
5279392	0.00931043669451	5.160317479280001		50.1877842397	0.0	0.0933680951605	0.0		0.008771223158754908	15.848843204743302	0.0	335.79444039154	0.19788942417963606	0.0
1157705	0.0282342376215	0.00165566318901	0.5025731483470001	542.162678809	0.0	0.325590108655	0.0	0.3566128861221571	0.026779381738373662	39.36294916141201	41.993497258314704	1004.700361215	0.22162355040143888	0.19306997147238966
1148297	0.111292752394	0.17203875214899994	0.176975846582	11.033118529000001	0.0	0.131456761463	0.0	0.1347016010760177	0.04740724101664832	1.394170314539	1.478813388152	40.14283369003999	0.2993091671193661	0.31007964470667265
5279070	0.4533752497899999	0.0		0.000194263811863	0.0	0.5	0.0		0.02942555019564792	6.7176989568637	0.0	210.62156684582283	0.13248145094773295	0.0
5279230	0.012200205101	0.590746851172		130.03216024	0.0	0.0858517643086	0.0		0.012200205101	3.334004349192	0.0	197.28785339360002	0.1660604364855065	0.0
1157825	0.0452652469128	35.3115423849		2201.19918977	0.0	0.0996165568774	0.0		0.042669980148672564	40.67382261134157	0.0	2292.579443402049	0.1213164158147818	0.0
1150267	0.008251174423189999	0.000220298090426	0.006608942712770001	0.34009669668000003	0.0	0.131507775524	0.0	0.1412452603008704	0.007254978883509665	4.265587093130426	4.43573192533277	7.425538261110001	0.3254315304948104	0.3510046114047445
1150265	0.000239121221655	0.0	0.0	0.6744165373309999	0.0	0.0492073976222	0.0	0.07693797546456722	0.000239121221655	4.26536679504	4.42912298262	7.759858101761003	0.39220404234851736	0.4353925667638424
1160729	0.055071114558499994	0.0561028555967	0.0722256296431	0.743053232436	0.0	0.26638917794	0.0	0.3013146741914779	0.06424472642588397	7.0759374045567025	8.5804397014431	182.587533815436	0.22294810452671154	0.26758803441474954
1148517	0.00308269009417	0.0255798543803	0.159786430537	15.8970111845	0.0	0.35847208619000004	0.0	0.4509666174717902	0.001337942121096161	11.2102747920403	34.374625811287004	233.3798720044	0.2738831615116545	0.32242787588506705
1150527	0.318390482886	0.0264931302518	0.0075694657862200015	1.47433396894	0.0	0.883211678832	0.0	0.7098279723701919	0.05076497962499386	7.941853016009801	2.08452267272022	241.22094414974003	0.26314139408497483	0.2615155146886155
1158915	0.129136913206	0.0342937857495	0.0385454338539	0.7593071807199999	0.0	0.164379725567	0.0	0.1960906787246051	0.04348085446168942	2.507110791032002	1.8639737400775016	36.8999857133996	0.2072042594963058	0.13271334431061402
1152349	0.38351542660800003	8.53157661017	8.8230771228	82.9323914578	0.0	0.5943510832150001	0.0	0.6208437897661804	0.4464983677620516	38.19608773176199	40.60650281570099	412.49237138044	0.4735242839351706	0.4734025057079177
1158927	0.641478647768	0.0593284423667	0.0593284423667	0.0593284423667	0.0	0.71214953271	0.0	0.7201507673629358	0.3802395940663504	1.8361691088793999	0.3499289005264001	5.617472279219401	0.6714518760196072	0.5801890561119185
1157507	0.162210393368	0.635581873939	0.692472372903	76.2325838758	0.0	0.171668018383	0.0	0.1704189276981725	0.0645077091327419	5.9334071542589975	5.781609553013	719.6445059877997	0.1552069616988642	0.14585482942699304
1157531	0.0603997794717	1.75092640969		90.86447290379999	0.0	0.198525970987	0.0		0.060748180200610284	6.62884075559	4.05014779334	163.93424285589995	0.267185148017753	0.050560436241514864
5279640	0.024628123498400004	21.6056165844		55.728453933699996	0.0	0.183166720413	0.0		0.016643520909506382	56.091955037086	0.0	760.4982562703999	0.27846751257953434	0.0
1152279	0.0312149883398	0.336043363903	0.334166026674	12.4428625227	0.0	0.159842347274	0.0	0.1595799155462539	0.0312149883398	0.7124928333252	0.7106154960961999	12.8193119921222	0.2854748603352622	0.2852516711917719
5279770	0.00095654764434	0.751891197746		2.75672668898	0.0	0.219373219373	0.0		0.018115741864145	4.212444392	0.0	14.38757153674	0.6850484540841821	0.0
1158983	0.344147973897	0.15609535003		0.274271824179	0.0	0.523333333333	0.0		0.04429955118289335	0.658649312652	0.0	27.717799482679	0.2754025113628139	0.0
1151415	0.583815030791	0.0	0.0	0.0	0.0	1.0	0.0	0.9999999999899976	0.12658966067850871	0.02392326018884749	0.0214794862986475	0.5694343139617474	0.6313281715305539	0.6094376477582657
5280896	0.031091047707099997	0.0		0.120996781145	0.0	0.00217155266015	0.0		0.031091047707099997	0.037163635002781	0.0	10.670193813105	0.061760969412698735	0.0
1157511	0.306606078479	0.232167455099	0.200144303595	4.73648755428	0.0	0.512687251605	0.0	0.42105731346308223	0.11664331546187875	5.1884147419922995	4.29527267308411	96.41931492656231	0.3515491203487177	0.1881007838956296
1151357	0.167115281142	0.0	0.0	0.0	0.0	1.0	0.0	1.0000000000208578	0.0945842896020659	0.1681775111939	0.1924447359636	0.32168181671240004	0.7520435967301826	0.7934647867378691
1150321	0.256115174661	2.84474152875	2.89709221454	12.4615835375	0.0	0.422535997321	0.0	0.4279783548529756	0.22690580549644004	3.948596925801	4.000947611591	13.565438934551	0.5121180686532288	0.5167158042965814
1150569	0.266049049482	0.0585580491606	0.00799380203534	1.01972407529	0.0	0.433874709977	0.0	0.17264306217879655	0.04543032963109172	0.2108068634552	0.16769241234614002	14.289317842041	0.4123711340206996	0.3896495150035739
1150473	0.618231055656	0.122040026326	0.124731660042	0.16936270281399998	0.0	0.675758739915	0.0	0.7097096252962574	0.4045956741554199	5.721928845265603	5.7097035625866	16.933326299587602	0.516750602145624	0.5248026262928925
1159693	0.0010108854361900001	2.36326048183	3.11100908334	7.487044350439999	0.0	0.371525019857	0.0	0.3333020390699187	0.005287177672918461	8.78143824419	10.382532055029998	43.78822694344	0.2951250841028085	0.32438209397356915
5280684	0.00755311486803	0.005526428169109999		43.408709711499995	0.0	0.0037958667229	0.0		0.00755311486803	5.2434117241611	0.0	204.3541341007686	0.16197319867916316	0.0
1157775	0.0288418750796	18.9610147077	37.3615669738	991.7046868369999	0.0	0.179824317563	0.0	0.17941951996592753	0.025317277620816	28.28811594298	46.33337096568	1145.6704009852	0.2319247849015997	0.2089755712104359
1159013	0.384509689538	4.3586349173	1.35743467149	4.60979554127	0.0	0.890737659456	0.0	0.6130607410513964	0.04544678314876618	12.150101148090243	2.94547350265724	107.96931824378521	0.7519982238008758	0.5871085270823627
1150319	0.9941517534190001	0.0277340792272	0.0277340792272	0.0277340792272	0.0	1.0	0.0	1.000000000001811	0.13801591353829634	1.6409757979522002	1.6463529234802	6.820764917497201	0.4724262803935433	0.44180764048066296
1151969	0.142015795293	0.0		0.0	0.0	0.07823129251699999	0.0		0.142015795293	0.24873743657420005	0.7101860942232999	25.739798067855002	0.1534822312686374	0.1970432607404059
1152273	0.0683485696275	0.695212249571	0.6833611323819999	3.86785119522	0.0	0.261917234154	0.0	0.2565997478344609	0.0683485696275	1.0716617189931998	1.0598106018042	4.244300664642201	0.3526799387442508	0.3480163485219037
1151787	0.0076114022442700015	0.0202029426109	0.0112454717128	12.4085723338	0.0	0.0316316943313	0.0	0.017062468200225632	0.0076114022442700015	0.09335125137660001	1.0642228886763	43.91609742814	0.11391836505548987	0.10865286365929128
1151443	0.0	0.00276596369804	0.00316110136919	0.00553192739608	0.0	0.5	0.0	0.5643822977722655	0.008120116091583486	0.14077585346982	0.10665805858295	94.63512005059609	0.26962193234567633	0.2809562751611882
1157993	0.102888411425	1.51501883467	1.34294279088	73.6237782877	0.0	0.149388996083	0.0	0.13562637425400795	0.08661950102879319	2.97373962892	3.69127134084	133.4419766832	0.1838573005305759	0.18234092878285715
1157797	0.130032818143	6.918389081489999	7.415468903200001	27.3698521252	0.0	0.444366197183	0.0	0.3706127165166708	0.03268450061177169	9.32710123528	8.971803991880002	153.9657141482	0.31839992617865004	0.2580320161430715
1160709	0.09603633209969999	7.0198345489600005	8.5082140718	181.844480583	0.0	0.218734228323	0.0	0.26431647886559884	0.07977450490872481	8.7603701829754	10.0732797773964	302.7746409109824	0.2942863646706925	0.29427038049801746
1148483	0.225065694539	0.233198011934	0.213275316957	38.20721992	0.0	0.325259515571	0.0	0.30692735654743525	0.05104337234938881	25.932526843844	38.42037731318701	668.088099358	0.3058577123166562	0.3221853547946846
1150313	0.00891547681452	0.00458011987939	0.0086417356215	4.2245640344	0.0	0.0106148608051	0.0	0.01992277058096888	0.010792997769498464	0.59798762005039	0.6204572212955001	5.323965992830001	0.1316486651724172	0.13790924370215288
1158925	0.509430540443	8.44721592897	0.8051563225239999	26.236442920100004	0.0	0.747400611621	0.0	0.6387564948216379	0.3193269262564308	10.643943713526	2.9825514993399995	29.37292370450601	0.8213438735177971	0.7620152373666738
1147181	0.21345516558400002	0.239200678276	0.249096123967	8.56469904294	0.0	0.347027972028	0.0	0.35363984106988955	0.06156742183700242	2.41801951805	3.3110471189100004	107.94157844103998	0.2842699416945984	0.306858391299023
1152275	0.533784642875	4.234046717169998	3.90158954216	5.93790246034	0.0	0.838815789474	0.0	0.8090010105383542	0.2787879262298021	33.459861798602	34.823830145534004	330.62192640475007	0.4769162474105914	0.4500354402489357
1150521	0.234474820681	0.0	0.0	0.0104270565498	0.0	0.492753623188	0.0	0.3678850352793993	0.01790987672762227	7.941853016009801	2.08452267272022	241.23137120628982	0.2647852251503524	0.2622770312813488
1149733	0.0	0.0		0.24342773181	0.0	0.0	0.0		0.0	2.06149184595	0.548239746102	43.70731152198	0.06149169978956345	0.03318339271041912
1151771	0.0148112139339	0.17834742052900002	0.199217032758	4.08976138555	0.0	0.303734439834	0.0	0.3288240604479289	0.006369339403477174	11.977880505159	8.000571855888001	61.90733277525	0.25896748239993145	0.2627878702091895
1148539	0.0168155539298	2.2913532898400004	45.97028148810001	1106.05049432	0.0	0.237123420797	0.0	0.33147842286735424	0.015332085872641132	5.78421066345288	53.39391987906001	1275.76717731608	0.3035176743784131	0.32566139698777635
1159419	0.8086344982320001	0.0213676807471	0.0213676807471	0.0213676807471	0.0	1.0	0.0	0.9999944284532966	0.4950379910738921	1.7629516740270996	0.27671146567409993	5.5442548443671	0.8043956043957999	0.6459818029689235
5279134	0.044297401630999995	0.204376556154		4.68140063607	0.0	0.282487309645	0.0		0.041727630807414456	0.204376556154	0.0	4.68140063607	0.3109919571048745	0.0
1148505	0.0022988013321	0.048879339126900005	0.171811885433	30.370099615999997	0.0	0.300565770863	0.0	0.33168841488643475	0.031794085851584435	56.5117001282908	154.3431777913961	701.9019348232712	0.2703968537717218	0.3248078938891701
1159081	0.016363567286	8.5766835222	11.118284878299999	1238.60518582	0.0	0.0732310737259	0.0	0.08658147360620222	0.016363567286	19.902151796725	22.439568794777998	1364.42819438183	0.2008968022781836	0.17830633817078406
1148499	0.0	0.061764824437	0.147059105802	0.555883419933	0.0	0.776298268975	0.0	0.8137550423305775	0.0004336249062717252	56.524585613600905	154.3184250117651	672.0877186272041	0.28177499710326026	0.338237824569247
1147405	0.24644036434799999	0.30621791827100003	0.328679320457	7.6922055025699985	0.0	0.403100775194	0.0	0.4652963773861308	0.21209815107998506	0.34983225688882	0.36579226987311997	34.342932708177855	0.4690181124882218	0.4931669135189784
5279102	0.005823331321649999	15.7173063297		51.099154148100006	0.0	0.608075404407	0.0		0.005823331321649999	44.24856215000001	0.0	151.6755131641	0.5947940151671616	0.0
1150285	0.061120079391099986	0.056172370168500005	0.0388013929405	4.44779872387	0.0	0.12014075067	0.0	0.11464228605981225	0.061120079391099986	0.19245254091949998	0.1963413219495	5.6727127383500004	0.3650470371448612	0.3648783946844448
5279388	0.009924889604850001	0.00508712866576		35.4837138193	0.0	0.144078947368	0.0		0.00735397571515635	21.610703713065767	0.0	91.21216775299999	0.17547267547277726	0.0
5279376	0.066528568844	0.63549286635		12.8133544764	0.0	0.237508111616	0.0		0.03551103714525314	1.0756524613829	0.0	22.381030089512898	0.2805149396060591	0.0
1159181	0.013449021300299999	0.214570110518		6.96328537527	0.0	0.391383365405	0.0		0.012039544549365124	1.6156906454700002	0.0	18.27941607957	0.4243692406743161	0.0
1159715	0.279457049439	0.0	0.0	0.000601143416134	0.0	0.5	0.0	0.4779734719571174	0.03749428043402764	0.08663028915182999	0.08502791324279	5.638318624335335	0.17963967115637064	0.17266643561158204
5279160	0.014561552335600001	2.50148708258		103.220996001	0.0	0.0972412443749	0.0		0.009669361440218438	2.7058636387340003	0.0	107.90239663706998	0.19242457130469004	0.0
5279858	0.025978837790099997	0.0		59.6670081524	0.0	0.013691128149000002	0.0		0.025978837790099997	4.547898656110379	0.0	75.2751140092002	0.43653337048923857	0.0
1148393	0.548380936659	0.08126698527489999	0.0874748799833	0.110613396624	0.0	0.759259259259	0.0	0.8094105207056617	0.0940065039998651	0.24944449646879996	0.2799196159469	0.4322952133364	0.7589158345220122	0.801102404271352
1150537	0.0	0.0236545805819	0.0189236644655	29.84699961	0.0	0.51968503937	0.0	0.516230573740731	0.02304395786972461	2.0454418848999	0.1849992813295	171.8944081779	0.2866552119128242	0.2943993652277062
1157737	0.00443994756614	0.08086635809739999	0.049490939331	6.1560997138	0.0	0.297551789077	0.0	0.2005771217764429	0.0072618413091339986	0.4322339362694	0.321753861703	63.16763182800001	0.13060444373644095	0.09870441832049152
5279096	0.00816274409077	1.76817949602		212.246495821	0.0	0.102729194695	0.0		0.00816274409077	35.74131347862	0.0	565.213521215	0.2571719226852597	0.0
5280906	0.0	0.00122809514869		0.0294742835686	0.0	0.0416666666667	0.0		0.0074032390872671066	5.23788529599199	0.0	160.9454243892686	0.1906546344445577	0.0
5279848	0.041332498074300006	0.0		1.3542410507	0.0	0.00260707635009	0.0		0.041332498074300006	0.850108183433	0.0	32.0213380761	0.0942392613405096	0.0
1150003	0.0166808568087	0.009097768808719998	0.0177999824518	0.638105958817	0.0	0.234693877551	0.0	0.4635018916426231	0.0299426164939448	5.31531441201232	5.3438655532254025	6.2512307437226	0.7240943555179523	0.7621102916335808
1148485	0.022949564249900002	21.9037780101	28.570085240700003	238.370978807	0.0	0.344880174292	0.0	0.3699368906012842	0.03197715278323433	25.7815507499509	38.393231871245106	630.4921205933042	0.3397243449781016	0.3601563746463297
1150517	0.0613701735649	0.593407500171	0.611815485674	1.09940195843	0.0	0.257000622278	0.0	0.26010514917696553	0.03341197406909315	2.560710335039	2.579118320542	3.0667047932980003	0.5328638497655501	0.5348155566913682
5279390	0.00938403273058	0.0125430988592		0.05978238752140001	0.0	0.28335832084	0.0		0.0077144719992434515	21.6181596832592	0.0	55.7882363212214	0.1882793971389436	0.0
1160599	0.0571432607974	0.902571907442	1.69834169955	18.8905204762	0.0	0.0648474178404	0.0	0.08322008081819006	0.04736018038264756	8.181897758474701	10.553910453221098	236.607876358136	0.15516986341877326	0.19021923042031785
1157513	0.011386731252899998	0.30564835589	1.10527612737	366.221910254	0.0	0.016500277315599998	0.0	0.0484346113378465	0.011386731252899998	2.019226730379	2.808142180942	829.5937083771	0.0852248844051521	0.10302337866149897
1150583	0.65105709931	0.0	0.0	0.0	0.0	0.98927613941	0.0	0.9999999999969412	0.09749276651661264	5.925774550070001	5.9321125062999975	5.9321125062999975	0.9849776695086042	0.9999984935123962
1150479	0.0759561557367	0.042940123312300016	1.02798444577	21.2707331608	0.0	0.16805771679200002	0.0	0.17338325173224053	0.04905387101486138	0.3130716897579	3.883565279888	32.309080799330005	0.3973442896272624	0.491246442629372
1148481	0.016763679517399998	0.0	0.0	0.0	0.0	1.0	0.0	0.9999999999918407	0.12608508133782526	25.699328831909998	38.20710199623	629.8808794380001	0.30421399780130104	0.32347800748606026
5279184	0.0435489607113	1.5671538965399998		3.93313900392	0.0	0.535095715588	0.0		0.02461777893599982	3.4605531942539995	0.0	11.63084484776	0.7260858649261667	0.0
1151767	0.011435610874999998	6.79932972221	2.7927325278400006	41.008876461199996	0.0	0.227281687364	0.0	0.2264916420816873	0.009156614890394698	12.355458335156	8.315394236711	69.4371430728	0.3400872683282357	0.3356591312655425
5279174	0.0	0.00370567660138		0.0102908418849	0.0	0.376237623762	0.0		0.020234235417135347	4.21615006860138	0.0	14.3978623786249	0.6780157835402045	0.0
1160737	0.121796283712	1.5809150560799998	1.3982209204700002	115.700990042	0.0	0.346948312926	0.0	0.3036191852625811	0.09357850900128653	1.5809150560799998	1.3982209204700002	115.700990042	0.346948312926	0.3036191852625811
5280898	0.040253445019300005	0.0		4.63675007802	0.0	0.0	0.0		0.040253445019300005	0.910091239144	0.0	64.58665710275	0.058212465699686786	0.0
1151699	0.007334202313359998	0.886353406822	2.59085856925	9.45165508427	0.0	0.220693450743	0.0	0.2395765007085395	0.011953334119736292	3.479423224608	5.576492521855999	15.763878042255998	0.5901614606911457	0.6111612597176013
1157627	0.0540479359252	11.545933043900002	7.465237333789999	64.96457467319999	0.0	0.271186440678	0.0	0.2897021570293775	0.02703549457604453	25.247463124644298	15.7534561629743	219.80997620604438	0.22270319530652707	0.24149884747868594
1152277	0.634929942872	0.112104435218	0.117727228208	0.133189908927	0.0	0.841688654354	0.0	0.8856444382841049	0.882240685583747	29.33791951665	31.039967831581997	324.8172138533372	0.3753198748934379	0.3519134559069315
5279218	0.00583599130306	2.85717365357		15.8010627127	0.0	0.08626423460650001	0.0		0.00583599130306	9.348114744084	0.0	176.11243049323997	0.1333379510976819	0.0
1151705	0.050877185695	0.318761689312	0.408907301855	55.4000198492	0.0	0.0962812960236	0.0	0.10665169219865232	0.038966438879679294	15.946534986232829	9.429595053977033	123.70867853651964	0.3972465353755314	0.3812004623180121
1148513	0.00025941376166799994	0.436092783057	5.806737418609999	15.902472252	0.0	0.670653566852	0.0	0.6803374361044715	0.00031090973106538016	11.646367575097301	40.181363229896995	249.2823442564	0.3288733645133565	0.3720321787962993
5279768	0.0113100599621	0.331748587509		1.2085760597600002	0.0	0.113228699552	0.0		0.020979551893112985	4.547898656110379	0.0	15.6064384383849	0.5834428383707886	0.0
5280728	0.0110473241483	0.000647161476081		4.19452305572	0.0	0.00260586319218	0.0		0.01856372048285	0.037163635002781	0.0	10.549197031960002	0.06765463917527363	0.0
1150231	0.000953427414432	0.0	0.0	0.00367163484043	0.0	0.0508555893171	0.0	0.08788202653729238	0.000953427414432	0.0261622045655	0.0261622045655	0.02983383940593	0.14496137955825547	0.15876857652655155
1159415	0.0194748707278	21.240500913800002	42.3375087243	4202.58712568	0.0	0.0913703210119	0.0	0.08904847926667114	0.0194748707278	31.4436553217	52.65522066	4302.0162416244	0.13954217045127176	0.1232554945310744
1151975	0.259136479735	0.0	0.0	0.0	0.0	1.0	0.0	0.9999999999842902	0.094525464791409	0.1681775111939	0.1924447359636	0.32168181671240004	0.7588339222614232	0.7991207863939107
1151949	0.0100219928563	0.0176642217775	0.0145215074735	1.12344005566	0.0	0.177126099707	0.0	0.1877091343285844	0.001652697872150629	0.07314830876570001	1.0529774169635	31.50752509434	0.15991247264802172	0.15984728513864302
5279862	0.0	0.0		10.902428004	0.0	0.0	0.0		0.0	0.904805552651	0.0	113.09256168	0.091601635079911	0.0
1150515	0.602041296488	0.136280170751	0.15753992900900002	1.22491401448	0.0	0.7015887635279999	0.0	0.7087441778462701	0.2889564527643748	2.426598719923	2.456007279054	3.523381364525	0.8314606741575844	0.8366360922284637
1148495	0.000679771772946	0.228449553251	0.228449553251	11.656081609700001	0.0	0.524565381708	0.0	0.5428738195693276	0.03901131366192472	56.7530351668519	154.5468745650161	683.7438002369042	0.29357730746599064	0.3481854076595287
5279192	0.0930897523374	0.290815616012		55.1606127954	0.0	0.291344981715	0.0		0.05108907609266217	13.238201427112	0.0	120.74501832450001	0.4823384446876559	0.0
1151779	0.014946994748700001	0.0125439636759	0.01047146372	9.11335187788	0.0	0.127121840815	0.0	0.1058336296429844	0.012892575959018614	0.05548408698820002	1.03845590949	30.38408503868	0.1568930041155569	0.15495999574884362
5279632	0.034882384038900004	2.74325749802		67.25569315359999	0.0	0.265055219837	0.0		0.02235239468531096	16.571070708224	0.0	260.76367248002003	0.2368295538308458	0.0
1148501	0.008791206209129999	23.7732863739	60.7399797341	786.241512084	0.0	0.244363796327	0.0	0.2528195600931941	0.030489933806831224	24.2349590113373	66.706503583247	818.0409955205	0.2989055784484618	0.3150923962361111
5279840	0.0288467792747	0.0991516503491		5.594941177869999	0.0	0.0100113765643	0.0		0.0288467792747	6.816850607212801	0.0	216.21650802369285	0.11369743500234168	0.0
1151707	0.370529955944	15.4555845502	8.8486867938	68.1362821522	0.0	0.565028161802	0.0	0.5112751353901326	0.4113920792362559	17.37898344570583	10.765011597887032	81.91847505125962	0.5876890014581209	0.5781806340174243
1150525	0.179932508479	1.90495936727	0.8333138935269999	1.91285865253	0.0	0.874371859296	0.0	0.427230900645194	0.01109777737621606	9.820319253028	2.910267100461	241.65946883332995	0.2644165594910248	0.2605269003851285
5279838	0.021614926017400005	0.0		64.9148849533	0.0	0.00940291490362	0.0		0.021614926017400005	9.000441438274	0.0	219.42332638270162	0.22065189712258176	0.0
1160745	0.266498629857	1.6056294827700002	4.32629867201	4.91274092009	0.0	0.822158035898	0.0	0.8575046842248741	0.12688709008413213	9.234773525382687	10.35512015468269	22.82638911208269	0.8397067690650456	0.7748693152067054
1151777	0.0031271613402199996	1.35943555296	0.0954936526541	9.50907251728	0.0	0.106264213355	0.0	0.03917134669661875	0.0016259356554492249	13.337316058118999	8.096065508542102	71.41640529253	0.21492038881233924	0.1982859247007928
1148259	0.0101633884771	1.3509543436200002	10.0855918302	648.828751205	0.0	0.0361173814898	0.0	0.09701887118074837	0.0101633884771	7.135165007072881	63.47951170926001	1924.59592852108	0.28458403260591164	0.3094720516776967
1151781	0.0	0.0		9.31036583082	0.0	0.0	0.0		0.0	1.35943555296	0.0954936526541	18.8194383481	0.05525099430271256	0.02036674233812157
1148497	0.0125667506341	75.4438310592	47.995083201899995	729.001679965	0.0	0.307727585416	0.0	0.28160663799766744	0.04021889697509686	75.9244364713003	54.008938987704404	761.0378230847873	0.4525931928687213	0.4669873684057954
1158471	0.00639006418967	2.02085068979		53.240682131099994	0.0	0.0711058263971	0.0		0.006221379604662803	3.298337582119	0.0	86.9783808192	0.1579529533217156	0.0
5279604	0.10816509194599999	1.65852577178		13.0546527465	0.0	0.7962817784749999	0.0		0.13309010110811234	1.65852577178	0.0	13.0546527465	0.7890866873068109	0.0
1160725	0.0448586885424	0.0		0.0	0.0	0.117318435754	0.0		0.008374782765302766	1.2823453957100002	1.9859840234274	74.0479763072	0.0853798081154575	0.08665564772716784
1160579	0.0017714158055000004	0.0		0.0	0.0	0.106194690265	0.0		6.205859123283212e-05	1.2823453957100002	1.9859840234274	74.0479763072	0.08715038508303581	0.07981311826739798
1152287	0.0218918009472	0.641468389891	0.653182159178	837.58823659	0.0	0.0518962075848	0.0	0.05102214095665737	0.0218918009472	15.728482720591	7.844147579188	1093.767764172	0.1336921676496249	0.10648114838143907
1159329	0.0991381322752	11.4359734849		145.582694226	0.0	0.197090877131	0.0		0.07018713147166927	16.0841142788	0.0	155.44464073292005	0.2423707356074073	0.0
1150567	0.204052592363	0.29363208000700003	0.0129716213414	0.786354992451	0.0	0.607242339833	0.0	0.4412597612792332	0.014551248036000509	0.4458808943016001	0.1726702316522	14.055948759202002	0.4181450707388991	0.4127336875555523
5278736	0.025606928432200003	0.00072691886453	0.005582666664850001	317.059416318	0.0	0.00032268473701200004	0.0	0.00235646931118149	0.025606928432200003	9.756978438254526	8.10000685848485	1191.008062461	0.06672173857785241	0.06794938735392574
5279738	0.06423484853269999	0.0		0.0	0.0	1.0	0.0		0.008290806536589241	0.1026129252495183	0.0	5.314341938618201	0.2186219739292327	0.0
1151737	0.0077911661564	0.0750931743532	0.12842639477499998	66.51923735279999	0.0	0.0341548612459	0.0	0.0581729097935119	0.007791166156400002	3.3543215197591003	5.514110684223099	90.77807428845	0.2847295864263211	0.3056316317768892
1150581	0.00127626949951	2.34699546994	3.2856739044700003	232.363049447	0.0	0.266585400159	0.0	0.27908093928140626	0.005227889625171543	19.682939452739998	9.355867302430001	507.872221243	0.25449252293394786	0.21803403631548304
5279244	0.0166073789788	4.62559493346		168.88803753	0.0	0.144970830112	0.0		0.0166073789788	5.2788416950505	0.0	169.839177238508	0.2319004862335562	0.0
1157379	0.00369810492983	0.0		0.8317332590809999	0.0	0.0	0.0		0.00369810492983	0.983354841199	0.0	50.75486664228099	0.12244132863431065	0.0
1150015	0.559782824604	0.00413134477276	0.00413134477276	0.00413134477276	0.0	1.0	0.0	1.0000000000029603	0.04722293080700004	0.08679387093435001	0.11767508668705	3.63665497546025	0.4369491525423485	0.4995679981243082
5279114	0.0058555953976099995	7.598400478999999		25.8778172919	0.0	0.0963573576919	0.0		0.0058555953976099995	23.83385813147	0.0	202.74914427150003	0.2645898312727035	0.0
5279294	0.014323498692100001	0.904805552651		102.190133676	0.0	0.0992450931052	0.0		0.013220360414902778	14.233158037101	0.0	280.1732847499	0.15645795890632816	0.0
1157421	0.0633211643752	0.0	0.0	38.6042143091	0.0	0.0913242009132	0.0	0.07938695799397001	0.06192864876741599	10.7784402452	3.2482013967400003	276.0299971151	0.08902443587922844	0.06458950456393234
1158879	0.284798970745	0.0290808596183		18.6431926222	0.0	0.34269662921300004	0.0		0.04950519709487397	5.361310274458298	0.0	91.3699644034	0.2637642330875977	0.0
1160583	0.025082664343599997	0.176385041792	0.0125132716494	20.0276337645	0.0	0.12565141864499998	0.0	0.020153653557258504	0.012269440066232751	1.2823453957100002	1.9859840234274	74.0479763072	0.08447037701972664	0.08837475887148598
5279170	0.0025192362854299997	0.00402902325732		19.8989349774	0.0	0.00428939090649	0.0		0.0025192362854299997	2.7098926619913204	0.0	127.80133161447	0.12950270959526694	0.0
1157629	0.0106879513398	0.0298026628443	0.0298026628443	0.0298026628443	0.0	1.0	0.0	0.9999999999997468	0.053678253615006916	13.7015300807443	8.2882188291843	154.8454015328443	0.1818944718343044	0.2009257481568828
5279142	0.0049857888688400005	0.0302630249353		18.3599241743	0.0	0.034640171858199995	0.0		0.0049857888688400005	0.4433095845743	0.0	113.6022356528	0.08082622361949675	0.0
1158955	0.0561548440718	0.00033622010960200003	0.00033622010960200003	0.00033622010960200003	0.0	0.08670157068060001	0.0	0.029878603391408725	0.05352424358944369	2.429898415399602	1.7859591666896018	31.279501010409604	0.22368186676185947	0.11564975752764788
1150605	0.0204974099105	0.0		4.21824591068	0.0	0.0	0.0		0.0204974099105	0.59798762005039	0.6204572212955001	9.542211903510001	0.11985157699462914	0.12555114264312878
5275594	0.00458318544866	0.0		14.7414022052	0.0	0.0	0.0		0.00458318544866	2.40059378427699	23.11099916971512	230.21531537727998	0.15660313712246865	0.18807328838670687
5278924	0.4539417214600001	0.0278458997873		0.0282068111137	0.0	0.767441860465	0.0		0.014794776240561391	1.2803687744241798	0.0	11.670025545450699	0.4766681866547928	0.0
1148487	0.007794104335699999	0.0715303197503	0.0563659369946	9.63385989238	0.0	0.392617449664	0.0	0.3978264403005048	0.011044362988932282	3.9493030596012004	9.879512567539699	401.75500167868415	0.3404614518850611	0.35805159044980434
1159035	0.0745801147968	2.42956219529	1.78562294658	31.2791647903	0.0	0.260675301171	0.0	0.13881345081425736	0.07164097047847054	3.5830191534996896	1.8828354943292704	53.553682257731104	0.4129840698528368	0.3071000744404633
1150543	0.005734781671909999	0.119418230148	0.0873177845715	84.6172927542	0.0	0.247353224254	0.0	0.2583515765631979	0.0060514336628121924	0.61679578256	0.8221391703915	114.98125556030001	0.2751468691790987	0.3022613377055816
1151971	0.037653513529199996	0.0	0.006159443553770001	0.230263324949	0.0	0.0	0.0	0.034337799350745296	0.037653513529199996	0.18124950898394	0.5998303958072699	25.564896674933106	0.1312581063553504	0.1622056241948466
1151723	0.0150429985494	0.13485778470899998	0.134959789575	17.2893968849	0.0	0.146401985112	0.0	0.12941186728908413	0.0150429985494	3.1824053667456003	3.2091850603328	32.5566887526004	0.5426911041572924	0.5553041251618824
1150617	0.0106083773697	0.0		6.19383671707	0.0	0.0	0.0		0.0060798858791137785	2.06149184595	0.548239746102	43.46388379017	0.06819360414865071	0.0368000096687457
1150229	0.11772794085999999	0.0	0.0	0.0	0.0	0.23999124918	0.0	0.2248035302628633	0.050267571996812935	4.3034421463273	4.4695342450292	7.1258528268392025	0.44537444933950987	0.4633330120602001
1150577	0.022513231935200002	1.609770243	1.4484514686	14.479887916	0.0	0.182277318641	0.0	0.1656587070970314	0.01893633416558457	3.9567657129400002	4.73412537307	246.842937363	0.2421357478110483	0.2461880766340153
1151769	0.0	0.00300511303067		1.60690609942	0.0	0.00345388053637	0.0		0.0	1.7786137500806702	1.3669856855700002	61.73132276632	0.08252899364004364	0.06675006352958555
1158905	0.11320886673399999	1.34162434477		37.0695037419	0.0	0.298270893372	0.0		0.0535157151406624	5.488324764870001	0.0	73.00104360537902	0.2869462955702288	0.0
1151793	0.00670815734226	0.00742603759863	0.0159961319587	6.97046087877	0.0	0.005360333531860001	0.0	0.011138364245835064	0.00670815734226	0.34485806294883004	0.8214701365243999	37.047761267785	0.09452874072436468	0.12051012467483355
1152353	0.0411397259476	15.087014330699999	7.19096542001	256.179527582	0.0	0.214095118506	0.0	0.16099567263158748	0.0315984167051094	17.866170801198002	10.375386879506001	264.339211236036	0.32751205525891497	0.2807066025622777
1158937	0.330525497093	1.07815836312	1.0588257553799998	2.01791136297	0.0	0.554621848739	0.0	0.4747608563528362	0.07756191665755928	2.0242161007790003	2.004883493039	2.963969100629	0.8587420042642351	0.8334129581715831
1159227	0.0379862259824	0.0	0.0	0.0	0.0	0.514888337469	0.0	0.4955902019795536	0.00886371931202513	0.028881565529450006	0.02142460378674	0.181921711614	0.4622028141681181	0.4337426830355275
1157493	0.060073013401699994	1.4587207942500002	2.34832854996	59.81819839550001	0.0	0.237527312454	0.0	0.2550793688872733	0.06859857226796932	1.6908882493490005	2.5484728535550003	64.55468594978001	0.3006664328302133	0.2931652234440934
5279042	0.007747617302569999	0.0		0.0309717612981	0.0	0.0	0.0		0.02095664803989352	9.000441438274	0.0	154.50844142940159	0.25373683822999155	0.0
1159235	0.04263570455059999	0.008959973929450001	0.00723690201994	0.152664171183	0.0	0.387883008357	0.0	0.3706311333369872	0.02155642248805715	8.79039821811945	10.389768957049938	43.940891114623	0.3029542296139765	0.3175312501763189
1158935	0.90573701843	0.946057737659	0.946057737659	0.946057737659	0.0	1.0	0.0	0.9999999999999628	0.13900592832039355	1.164457535036	1.164457535036	1.164457535036	1.0	0.9999999999996724
1151719	0.0013943269744400002	0.0		2.32359074493	0.0	0.0	0.0		0.0013943269744400002	15.774346239512	9.257594095655	125.85989274633002	0.2468354430378669	0.2329450877809165
1148509	0.0	0.0204570936039	0.0390707692131	0.055357735371199986	0.0	0.94983277592	0.0	0.9781417320358968	0.0003789878026159115	56.46282078916389	154.17136590596309	671.5318352072711	0.2670034205709368	0.32403396526852474
1151727	0.0066705411121599995	0.0445849965326	0.0873045120388	61.7667794805	0.0	0.0612192622951	0.0	0.12060625297852988	0.00667054111216	2.5904912723196	2.6341571231588	84.18920958976	0.19451423785600402	0.21583347970208508
1157547	0.0605993259126	5.29782528032	5.08913718011	643.411922112	0.0	0.150784427658	0.0	0.1392552797825209	0.05157053727460596	391.89266321532006	543.9736975781101	17373.786225411997	0.11721450106646455	0.12353327094566008
1160731	0.24354353831	0.00103202959872	0.00103202959872	0.00103202959872	0.0	1.0	0.0	1.0000000000713043	0.0946920760317542	1.5843551547424	1.4016610191324004	115.70443014066241	0.3481668066046528	0.3049185244075114
1158967	0.324908520234	0.0	0.0	0.0	0.0	0.4609929078010001	0.0	0.4042458588909888	0.2803522035335979	0.01624031522079	0.01624031522079	0.01624031522079	0.8242548818088496	0.7837301012117311
5279620	0.0142828447844	7.203977148210001		272.996708847	0.0	0.136848762748	0.0		0.013545461500201934	27.49056659643	0.0	1246.7975107060001	0.16760253645623993	0.0
1150535	0.010084492434499999	5.893572581440001	1.91087759007	97.69920161290001	0.0	0.238824181919	0.0	0.2177479821648662	0.030755453652585408	7.915359885758001	2.0769532069339998	239.74661018080002	0.2601680084003286	0.2593657489657462
1151377	0.5538244993370001	0.0	0.0	0.0	0.0	0.898876404494	0.0	0.8381296767826981	0.014923988935931269	5.930473727147901	1.9184470558562199	99.554847420821	0.27038583929987875	0.24407454206404536
1158909	0.08635332126919999	18.5908983681	2.7687968909500005	273.67798183400004	0.0	0.235089223514	0.0	0.15367472894120687	0.06888875115513471	29.234842081626	5.75134839029	303.050905538506	0.3341645885284465	0.2564825410838256
1159011	0.20713836538400002	0.502553962622		27.4435276585	0.0	0.256932373148	0.0		0.216637529366875	12.057751879468	0.0	173.89636431029598	0.2199804579183829	0.0
1157975	0.0425930493664	1.24135399447	0.8504991158840001	33.142670959899995	0.0	0.168829113924	0.0	0.14280357412478434	0.060195737506620876	2.7563728291400005	2.193441906764	106.76644924760001	0.1546343337748038	0.13756292820453975
5279386	0.074719706343	0.0286778587906		0.0716946469765	0.0	0.601666666667	0.0		0.012687584191800149	1.0668409271606	0.0	22.4152353434765	0.2719937328635212	0.0
5279760	0.09952552916549999	0.0982450858937		0.525167730011	0.0	0.0380147835269	0.0		0.04183854198406413	6.7176989568637	0.0	210.621372582011	0.1323905335199143	0.0
1159003	0.10886095344	1.92585126252	1.0052621474	76.7336239514	0.0	0.22444663753	0.0	0.16240577987770055	0.059218636652373736	45.78517261142	3.5247084723600004	145.81805186719998	0.4493522112285295	0.3114069778384669
1159353	0.114748866862	2.19492481975		3.1211987211900003	0.0	0.331545250043	0.0		0.09804316467697513	2.478775194789	0.0	4.553582399530001	0.3036726804125866	0.0
1159709	0.643252106607	0.000969951983279		0.0102892286486	0.0	0.617283950617	0.0		0.046216184081702735	5.3622802264415785	0.0	91.38025363204859	0.2675589716404577	0.0
1157411	0.0597107511812	0.00680701227975	0.007990840502319999	11.5055229285	0.0	0.12826446281	0.0	0.12457255336311898	0.05498211835438852	10.785247257479751	3.2561922372423204	287.53552004359994	0.09301465644752156	0.07068903134279275
1148503	0.000417782128547	0.018932774663	0.0473319366574	0.236659683287	0.0	0.730496453901	0.0	0.7699193101030328	0.018379041032634512	0.4806054121003001	6.0138557858044015	32.036143119787	0.5672291780077736	0.6136840414796197
1150095	0.08259761674810001	0.000369234512618	0.000184617256309	0.0185724959847	0.0	0.185986744218	0.0	0.2010343231876964	0.0581149741420051	0.20756657931661798	0.783792431964309	8.984947115104703	0.3878941825166447	0.4833315264273137
1151695	1.0	0.00756620411994	0.00756620411994	0.00756620411994	0.0	1.0	0.0	0.9999999999972282	0.25343245830744304	15.635339501040768	9.028253956241972	68.31622489143957	0.6933333333330871	0.6514729150776285
1157543	0.00685629215238	0.0108463182114	0.0894821252441	83.5213898834	0.0	0.00235063663075	0.0	0.019001096662880246	0.00685629215238	3.1736186217714	3.7740271885341	126.02792888300002	0.0640776699027878	0.0909436730521866
1158953	0.5115343158169999	0.035639331617900005	0.0104228233977	0.0537952175364	0.0	0.680473372781	0.0	0.2290487144735641	0.057534987230968684	2.4652015269079	1.7960457699776995	31.332960007836398	0.26464985994422635	0.1396677790808357
1159343	0.0031725475840400003	1.29595778236	0.550877323243	8.4351539887	0.0	0.126625099496	0.0	0.05127937117359393	0.0031725475840400003	153.25579639906	78.668658509943	386.73485171769994	0.2552609117932653	0.11036255618722092
1157633	0.0319055090681	1.91565787198	5.0582727986	110.449873489	0.0	0.16348585881799998	0.0	0.2424873396328193	0.018320410465069367	5.183101776331	12.106628316137998	224.91965784049998	0.14908507691181336	0.2256901624786265
1158943	0.0501225742727	0.2029736931	0.123380622535	5.82968451892	0.0	0.0975751135156	0.0	0.058665242944625585	0.03945990008341327	2.640605171020462	1.916400411526252	37.116918591850464	0.1848130556571761	0.0986171872083389
1157761	0.573283702249	0.0305524587748	0.0	0.0363234787656	0.0	0.783155856728	0.0	0.4439105420298303	0.09238266130360592	0.5580383791818	0.2844866335803	1.8773364413986	0.5615964162086645	0.3406486075804775
1157729	0.0016127617361900001	0.00381808627571		0.658909428414	0.0	0.00872705386699	0.0		0.0016127617361900001	1.50110737138571	0.0	33.846866402314	0.1876328502411665	0.0
1159351	0.134576477211	0.478113494253	0.421699925093	0.932180680174	0.0	0.514963387456	0.0	0.4092320693589475	0.11707172617884502	0.7533330089788001	0.853275622299	2.5164037476570003	0.6479980145598601	0.6001324155592015
1159371	0.018733818384599997	17.7745137421		171.730552778	0.0	0.223056340122	0.0		0.014556861959443803	25.344357381662704	0.0	216.92688961787292	0.4573004161454128	0.0
1159253	0.0	0.0005145798568259999		7.57274041947	0.0	0.00137254901961	0.0		0.0	0.039614231114676005	0.14780474515294	14.082650119653001	0.14279229621956085	0.13801218182121264
1157771	0.00852592463111	14.9278661742	19.0169063144	1093.86092143	0.0	0.0743054147232	0.0	0.05171347126022715	0.00852592463111	21.72099402463	23.248165089103004	1155.6668559262998	0.11465840534813625	0.08642004685494073
1158055	0.026228280621	0.176769421319		19.6853655555	0.0	0.196283391405	0.0		0.009972049295424465	5.319624978349	0.0	84.08941600770001	0.21141828196155169	0.0
1159103	0.00317039305438	1.86700719141	0.112743428093	45.316890466000004	0.0	0.077810241427	0.0	0.033911989381038565	0.00317039305438	9.262234352535	10.655724061342	154.1391222988	0.4641785616873548	0.4604845106503044
1159225	0.0164212279301	0.259555495635	0.17360247747299998	20.010182476	0.0	0.14758842443700002	0.0	0.10000531530673476	0.011265288234017005	6.678864218760289	7.4462564099282895	56.31249602976529	0.23674176776402325	0.2729865037242194
1158891	0.183219084532	3.57580714996	1.13779137199	19.9059220147	0.0	0.377751338489	0.0	0.30338405537013124	0.017836808701778204	5.409425306895	2.009169892319	48.80597866905	0.4040226518256849	0.3431100081641798
1157807	0.000605604407701	0.0		4.97007111041	0.0	0.0	0.0		0.000605604407701	0.0120897839952	0.00965483815526	42.23556126472311	0.04301016204335957	0.02716591749145433
1157351	0.0323494825379	0.0	0.0024500022700500003	60.4674957422	0.0	0.0	0.0	0.01283283313968326	0.0323494825379	1.97483668165	0.6765784467280501	425.8674086452	0.08352144469528312	0.09193771732106196
1158871	0.0490000906007	0.472478589509	0.384556389414	0.898475543363	0.0	0.527272727273	0.0	0.4166569522036528	0.02802831028543867	5.111156795478999	3.069955564494	427.1424875223629	0.1832686926208617	0.14629902343572174
1157381	0.056503526203	1.69420374511	0.323763334891	6.03949334368	0.0	0.530772246178	0.0	0.12726175177675852	0.02713133596783789	15.394768058110001	0.6340673102100001	21.887370747680002	0.4296416531399293	0.1292703118028117
1158099	0.17949871916700005	0.00525677728001		0.163682495244	0.0	0.136645962733	0.0		0.043941729361044235	4.931945189284621	1.5990705801212999	56.542316845914705	0.2137141793820304	0.14044877345051782
1159049	0.000394184834749	0.110031072982	0.00215424131602	11.138767052	0.0	0.0236472945892	0.0	0.0003329420340344567	0.000394184834749	0.5996962826107	0.35678967062282	16.088477073122	0.2679257362355223	0.2298315573692249
1158989	1.0	0.0	0.0	0.0	0.0	1.0	0.0	0.9999999999427625	1.0	0.27695843906279	0.21875708401779	2.81173834560079	0.8463271744026695	0.8040636346946343
1159119	0.00238941301749	3.9026995882	0.410118140568	12.515797508099999	0.0	0.150796922231	0.0	0.06394285682494191	0.0020206711241391733	96.6534753334	11.848178931855	219.09862960400002	0.5862102231224005	0.2692888084566887
1157667	0.00276344765508	84.9420948114	186.88666717799998	1479.5177418	0.0	0.189171769256	0.0	0.28496467409735915	0.007569815075249773	84.97634940331201	187.4203478008147	2040.595148755	0.2763690922733074	0.3351326054025944
1157965	0.0017719666748199996	0.127452066808		5.646397176490001	0.0	0.0410467825775	0.0		0.0017719666748199996	11.005203803184	0.0	51.21732446738999	0.15812243132159498	0.0
1157749	0.011639558133000001	0.331114870554		63.1403869258	0.0	0.0205537625276	0.0		0.011639558133000001	7.640201774102999	0.0	775.9081160878999	0.08386520865882052	0.0
1158875	0.0128216875061	0.0653627987631		0.280717259986	0.0	0.293548387097	0.0		0.015235049273728825	2.3071780080831	0.0	117.659344078986	0.1913800609495185	0.0
1158001	0.0346945143342	1.1400643925	0.6735807703229999	70.6189428249	0.0	0.0943077366968	0.0	0.05507213204643452	0.03211649619636514	2.73583563536	1.982834367923	160.6994518825	0.11263196025677598	0.07230960396425579
1159375	0.0989962360855	56.5202777262	6.05175842607	161.217219423	0.0	0.450256800457	0.0	0.25417420431682003	0.05207335278447986	73.367840193264	8.920932526824	364.268977513815	0.5068737129181513	0.4239256101126598
1157757	0.009149144989870002	4.77988863389	0.185900600743	1747.82714761	0.0	0.0516687268232	0.0	0.012566237424677893	0.009149144989870002	6.658108067323001	1.545442415619	1751.8027115540442	0.13520886615511907	0.08003268473195263
1157489	0.056829208904499995	0.0991451700684	0.146280828398	0.304795177304	0.0	0.432515337423	0.0	0.5513387211676715	0.011106673556934442	6.032552324327401	5.927890381411	719.9493011651039	0.16028775361063108	0.15328402903961946
1157949	0.007917100733920001	6.32871275066	6.40928752006	126.47657866200001	0.0	0.124666647952	0.0	0.11970655633639775	0.008496448422546954	11.561029252880001	9.130059913450001	235.74573626490002	0.15373602231479014	0.14463219554552526
1157467	0.005341415277899999	0.0339825102128		0.299564668283	0.0	0.013458608430700002	0.0		0.005341415277899999	0.7001571898008411	0.0	79.578657238983	0.167336010709565	0.0
1159377	0.0438527061266	8.48947573121	6.65301749081	273.928301503	0.0	0.133393137475	0.0	0.09309571766705632	0.035917983320836164	81.66911099431	15.39479340142	637.945735889	0.2478561474971845	0.18324660685135646
1157563	0.010342816966799999	10.844582063499999	13.116884085	718.66990687	0.0	0.0514582459085	0.0	0.06192485709480981	0.010342816966799999	299.9031774159	439.044555975	4769.311627360001	0.08854639962208412	0.11246167240093076
1159075	0.009947759939680001	0.0341553211038		0.557502134121	0.0	0.290956749672	0.0		0.04049239840782706	3.9220426913838	0.0	14.330486052411	0.361590087764426	0.0
1157355	0.0	0.0012537027942		0.0012537027942	0.0	1.0	0.0		0.013602271057477121	2.4086073340169	0.57342528533	12.8414734263212	0.4445670159956406	0.10840824571651747
1157423	0.0729756311229	0.405907121662	0.242471800302	31.3379761181	0.0	0.0919449279949	0.0	0.06067908776022728	0.05555492168148418	0.4691599524526	0.255320250464	133.9375672001	0.09501173708921458	0.06319862932380155
1157523	0.443606572138	0.487402051311	0.047823382885300005	2.31058906129	0.0	0.847062912756	0.0	0.38839890377815	0.13122013271830776	5.384773250093301	4.1031079171431095	75.39981586627229	0.4775685305021889	0.18618030876438216
1157613	0.373444426604	0.00640787148222		0.0088388228869	0.0	0.726315789474	0.0		0.04947028987515156	1.09593788482272	0.0	16.602142655536902	0.35717147435883234	0.0
1157781	0.27839492696699997	0.34409569166000004	0.198843207036	1.6538885444799998	0.0	0.441853686972	0.0	0.3093463215593721	0.3305799424047787	7.4922489206956575	1.6262108982056551	70.57056152603565	0.4949075820447605	0.2462876486985324
1157407	0.0175424096266	5.14285555703		64.4040504522	0.0	0.214794662521	0.0		0.012614879171791158	28.194909735787	1.45928932713	149.00979650927601	0.2644751428324373	0.057526048014692764
1157601	0.495213764824	0.0459306510165	0.032270241878	0.0514740054496	0.0	0.880357142857	0.0	0.31264187632267426	0.5654221534139999	1.0324281432255	0.979240406217	26.870468339349603	0.29071440907289314	0.14931328660767884
1158025	0.0024486260037600003	0.170076822338	0.0116318674554	85.9906894252	0.0	0.0684510750329	0.0	0.016352409188294434	0.0024486260037600003	0.540055128185	0.28318093462424004	350.05948075370003	0.1282117662287638	0.07240731534430488
1157327	0.014812136146200004	0.0269778171496		5.92420154053	0.0	0.0786214324179	0.0		0.011753426541731442	7.4149721356396	0.0	191.62384222253	0.17531667839569245	0.0
1159037	0.0407476733806	21.568553068099998	6.07253304648	260.886682402	0.0	0.279464438001	0.0	0.06482348241937587	0.029150416325431205	24.535864616896237	7.069750241239241	278.01473057349426	0.5437041702280746	0.3398106243838335
1159079	0.013598363236299999	4.450010535480001	5.3864489300199985	646.834677689	0.0	0.122010940349	0.0	0.14231266393210898	0.013598363236299999	16.329507244694	8.119519348845996	751.9986115873711	0.28369510348302324	0.2474133941931441
1157545	0.0027397324284200004	0.0		423.113298801	0.0	0.0	0.0		0.0027397324284200004	1.65396513934	0.042207824903	1077.753428518	0.07957425240744044	0.015651547901487147
1160571	0.00804627305232	0.00611701974412		15.035369119	0.0	0.00437345502947	0.0		0.00804627305232	15.23878879454412	29.5492070069	95.57865266530001	0.15153301886778528	0.16196756363072498
1157701	0.039102770640800005	2.58396920061		40.2186457874	0.0	0.08764678252699999	0.0		0.039102770640800005	2.8824460297001995	0.0	68.3484517258	0.11239143022569784	0.0
1157739	0.00482573246431	0.0235709070694	0.017678180302	25.2302348524	0.0	0.0162822252374	0.0	0.01221665430424774	0.00482573246431	0.3749384852414	0.28994110267400003	82.2417669666	0.0944795719843376	0.07216360496841588
1157477	0.00896350558386	0.00198558485135	0.0268053954933	49.67652890390001	0.0	0.0007440476190479999	0.0	0.010359037484877627	0.00896350558386	3.4192663529203497	3.4365166561753	451.83940229790016	0.06842979984089426	0.06492238079018042
1157773	0.0488880771373	17.1106962185	14.935459142100001	140.023116922	0.0	0.309277078707	0.0	0.30984886769198833	0.024378474643441526	26.437797453779996	23.907263133980003	293.9888310702001	0.3144961199386038	0.2802052410100683
1157359	0.00680283803138	0.0322828469507		0.658288538252	0.0	0.26998689384	0.0		0.006732250866333256	2.4073536312227	0.57342528533	12.840219723527	0.4437488491990958	0.1085679337971163
1157981	0.08363776368980001	1.42767679353	0.430851159899	40.9445935792	0.0	0.23512282931	0.0	0.08114736847955586	0.0708494025675613	1.915078844841	0.4786745427843001	43.255182640490005	0.3160119457848055	0.1217613205610654
1159203	0.0	0.0		0.128494814591	0.0	0.0	0.0		0.0	0.384138641268	0.0	39.307428383191	0.05128608510974216	0.0
1157741	0.00207042593528	0.00276933703572		166.462832566	0.0	0.00283724529275	0.0		0.00207042593528	3.10264707956492	2.9545556828718995	282.7776177738	0.08980959385472384	0.07053925154819712
1158991	0.0146191492585	5.513402747969999	3.42841307978	38.375768864	0.0	0.223812539582	0.0	0.1504736731773745	0.008922936482091805	51.29857535939	6.953121552140001	184.1938207312	0.3813578738354736	0.2628897775826503
1157691	0.0312902109155	3.04146010544	6.7694741815	57.0257806556	0.0	0.149202888677	0.0	0.2393916885829911	0.041006054704787416	20.15215632394	21.704933323600002	197.04889757760003	0.2593945055410975	0.2878928897088483
1157745	0.5539209111300001	0.00788337951235	0.00679121968278	1.20952121726	0.0	0.665987780041	0.0	0.3905685929548154	0.4270764844449309	0.22338577634934	0.09243464622708	1.43452882349379	0.7703853955375584	0.4042282527332639
1159135	0.010583011771499999	4.64345164504	4.48910157062	286.996992451	0.0	0.123358201114	0.0	0.12175773456693127	0.00862866909238806	6.665012209273	5.89384742481	362.34118095027395	0.3111585944918772	0.23857977847704595
1158027	0.0	0.00136373618443		4.40048865306	0.0	0.00566666666667	0.0		0.0	5.576375271780429	3.4454998919732005	46.471899054610006	0.16015061186069282	0.08771283476248011
1157509	0.034488173392800005	16.0657240017	9.48917189273	196.44221189099997	0.0	0.112134121204	0.0	0.11728466548696027	0.023138677251311718	21.363549282020003	14.57830907284	839.8541340029999	0.13741981468267295	0.13165821823684282
1157591	0.66371389744	0.0652501033619	0.0377604583045	0.0718814040301	0.0	0.8975	0.0	0.4773331257377227	0.2060704377981823	1.0976782465874	1.0170008645215	26.942349743379694	0.3043722919365948	0.15669654785645593
1159379	0.0141002004579	0.489373835677	0.296994768607	57.263518858699996	0.0	0.0989839901478	0.0	0.06046110567286207	0.014100200457899998	73.669009098777	9.038770679217	421.2809532447	0.3215132221034494	0.2395880791155417
1159047	0.013356945215	3.12820901048	2.01501482825	24.2946092814	0.0	0.0858021877849	0.0	0.04286147424882922	0.013356945215	182.4124655248803	69.179061987019	325.60550030740006	0.4080293085025279	0.35621205670588435
1157801	0.0	0.0		4.72037703206	0.0	0.0	0.0		0.0	0.2029736931	0.123380622535	10.55006155098	0.07681776696075263	0.04618526998173254
1158083	0.107411334792	0.0	0.00580187776359	22.947118027	0.0	0.00943396226415	0.0	0.2078029128887145	0.008323176378355649	90.05856923501999	190.33852200197362	1679.9795313270001	0.19524742773182446	0.2789416529616366
1159133	0.000127530762696	1.45085740771	0.051265991191	38.344642975700005	0.0	0.19292864062	0.0	0.043775445810024564	0.0002693146052801736	43.826917014710006	25.038563963161	356.7912409629	0.6132841713480561	0.5971073875290741
1157951	0.00772996534708	1.97483668165	0.674128444458	365.39991290300003	0.0	0.0979385577926	0.0	0.10559246270955376	0.01135409839274965	2.4568042377872	0.7996476481420001	376.6296543556943	0.17928790891026378	0.1057741646990876
1157617	0.010029106956399999	5.11647442362	3.44605294621	177.51467150000005	0.0	0.0934065934066	0.0	0.12001007541142868	0.008568082207741625	90.06022489820901	190.83529327255687	2199.195092109	0.25056433408600504	0.31127351567843997
1157419	0.0333252239916	0.0607726516901	1.8492977079	178.065085785	0.0	0.0226171243942	0.0	0.04095638154587592	0.0333252239916	0.5299326041426999	2.104617958364	312.0026529851	0.07871044016007163	0.058190280333428324
1157505	0.172276462421	0.0588634098094		4.02233423249	0.0	0.578629032258	0.0		0.13730110697164438	1.8097898194994	0.0	94.88680713629	0.21937195930969086	0.0
1158957	0.854544220168	0.218399797377	0.218399797377	0.218399797377	0.0	1.0	0.0	0.9999999999993968	0.6463044356018138	2.7362459989526995	1.2163944257327	6.880229827469702	0.7741429531704674	0.6915660068310391
1158861	0.00537264957174	0.098631842644	0.0984971127473	12.9671412572	0.0	0.0704387990762	0.0	0.05308402347496397	0.02266137496841749	5.508057149539	2.1076670050663	61.77311992625	0.3702252120501887	0.3137256849420844
1159115	0.0839497846174	14.1498497058	2.86161530245	31.931717742100002	0.0	0.455421686747	0.0	0.268566854601533	0.0233471236587588	14.9031827147788	3.714890924749	34.448121489757	0.6065031152647733	0.528689161251085
1157769	0.000672758311189	0.0988631533692	0.055629767011900005	92.9183679852	0.0	0.0522243713733	0.0	0.0344601849874635	0.0013080170894540415	6.8919910037992	4.2868885417149	154.72430248150005	0.18071837194036075	0.14399496798579428
1159221	0.00151682081775	2.45020793685		38.5830720506	0.0	0.0685073084305	0.0		0.00151682081775	9.129072155610288	7.4462564099282895	94.8955680803653	0.18298896122255925	0.18576423795744249
1158917	0.132004864474	0.459876992143	0.262226898747	4.0625888231300005	0.0	0.554260742899	0.0	0.14038585220166416	0.2561237095246835	12.457164869222002	3.7524586964670004	131.136517066678	0.32775838833367377	0.17653927285814866
1159713	0.0	0.0		0.006899013213109999	0.0	0.0	0.0		0.0005988312005096073	0.0120897839952	0.00965483815526	37.26549015431311	0.04688061310018924	0.029610557294451324
1159055	0.0376786669056	0.18916643846	0.155009254609	22.9944706452	0.0	0.216292134831	0.0	0.22841962792372936	0.13474830158064216	11.514634712984998	11.476293171087	148.81747920703	0.33553355335562685	0.2777387204743047
1157939	0.138144531145	0.210806594361	0.121409962769	6.14532231173	0.0	0.294739208633	0.0	0.1823504609857716	0.07470336485080094	4.281157660041002	0.749479588092	41.65663063613	0.27172991008339475	0.1308521779180444
1159187	0.049056179071399995	0.0303878914565	0.0303878914565	0.0303878914565	0.0	1.0	0.0	0.9999999999972004	0.002146162576345945	71.0538755764465	32.50677142173649	676.0318915629564	0.30619769415317555	0.2741173521033263
1158995	0.831450353657	0.0	0.0	0.0	0.0	1.0	0.0	0.9999999999921382	0.392176082780269	0.0063540001865500005	0.0063540001865500005	0.0063540001865500005	0.9824414715719064	0.9714491451908192
1159139	0.00121796666904	1.45440197148		8.98708361725	0.0	0.153117993855	0.0		0.001281938434497231	21.969554312150002	0.0	201.88116247265	0.2443905195623979	0.0
1157337	0.0129570791373	1.45625712879	1.28731729692	106.16015621700001	0.0	0.111340738827	0.0	0.08977256667819758	0.01219536968499598	7.78496987945	7.696604816980001	232.63673487900002	0.11940729664038467	0.1078924754887817
1158093	0.00856912677467	0.0	0.00518445220223	29.800815002399997	0.0	0.0555802578924	0.0	0.1114223239662342	0.024468170724696963	0.567493967908	0.31688115037823	70.50091051359999	0.11578471279966933	0.09806025177442436
1159095	0.067326571318	1.69296255053		10.6517851971	0.0	0.4339802736240001	0.0		0.02958465057968544	3.887887370280002	0.0	13.77298391829	0.3676305761038701	0.0
1157971	0.00896681090549	3.27520986742	3.20580830016	180.385272812	0.0	0.136719461132	0.0	0.11138982071175904	0.016103556246055282	4.6139288394742	4.1420467246629	214.498171914282	0.16385327057276952	0.1370398026545494
1159149	0.00784509797469	0.0		62.177349363299996	0.0	0.0	0.0		0.00784509797469	1.17570038751	1.1475867164	368.8242613653	0.10449973530964543	0.09349491250238492
1157985	0.025238398401000003	5.79019383242		56.4384610333	0.0	0.165244980755	0.0		0.02267280599960621	8.287312284024999	0.0	165.8114421505	0.1996572598590486	0.0
1157471	0.0083964104263	0.109286691179	0.994024521176	86.885996975	0.0	0.0740452065472	0.0	0.08428128330400601	0.00918442829364245	32.3214990203864	34.422749031977	398.65327039910403	0.12396382818371494	0.1414744941948431
1157635	0.034335132756599995	5.690452113689999	2.69625190127	187.34862473299998	0.0	0.0958731302937	0.0	0.07224676604795609	0.020239022435371585	8.957896018041	9.744607418808	301.8184090845	0.12509217671110834	0.16371333535270485
1159183	0.0	0.155097421266	1.00335349308	2.3129808175	0.0	0.046470735996	0.0	0.1321616848106079	0.0	62.2079486084912	25.846265790382	654.4680526992299	0.2585924207267281	0.23383617381378602
1157481	0.013729895818	0.103288288985	0.134136133682	266.687250648	0.0	0.0339485076327	0.0	0.043874151144732164	0.013729895818	16.169012290685	9.623308026412	463.12946253900003	0.06938648396146675	0.07714779255665331
1157767	0.009867678653709999	5.476976006549998		392.22128249	0.0	0.0578057412505	0.0		0.010818289652942684	8.737749289353198	0.0	760.2809823650999	0.14712443022022806	0.0
1158885	0.0	0.0		0.366134099226	0.0	0.0	0.0		0.0	0.948864027858	0.7391820217020001	10.695163067826	0.11941185207149264	0.0892585208584044
1159363	0.0016680434221199999	1.88371499325	0.8950550993899999	71.1556858493	0.0	0.130662260774	0.0	0.0534983123767694	0.0016680434221199999	3.843186856944	11.347045741204	89.84921625991501	0.4472757406257688	0.4535620847271589
1157499	0.00350474045894	0.0		2.58848416922	0.0	0.0	0.0		0.00350474045894	1.1400643925	0.6735807703229999	73.20742699412	0.08651264793742447	0.050520096630186716
1159327	0.157366255674	11.237656131300001	2.7871175694700003	126.161643579	0.0	0.288927500811	0.0	0.14907923160539518	0.17829660236967673	14.26030420809072	4.509632652444241	158.18520680334998	0.3282270593537221	0.1469852253178862
1157657	0.17320681417	0.986497492209	0.946970164339	26.818994333899997	0.0	0.271072512046	0.0	0.14387256266261922	0.10868326938719776	1.970790315361	1.7113700123006002	43.549417450051095	0.28246159473306903	0.13482635632102016
1158931	0.012946889656	6.001139809600001		66.2367980229	0.0	0.123723404255	0.0		0.012946889656	17.238795940899998	2.7871175694700003	192.39844160189998	0.2452896463542144	0.10970068139419953
1157309	0.0064371827457500004	1.05477839635	0.926748629427	28.593636585	0.0	0.0539682539683	0.0	0.08124098576339832	0.005639497244808792	4.548082626499999	4.982378748237	135.074643648	0.10672567655815007	0.10601776961095814
1159237	0.015374099502700004	0.0007351140811810001	0.0007351140811810001	0.0007351140811810001	0.0	0.076551024064	0.0	0.0623858680904113	0.014624825014014025	0.029616679610631007	0.022159717867921	0.18265682569518105	0.1600198055456509	0.1403412074549022
1158097	0.00782470345325	0.165350109979		256.235556767	0.0	0.159501746924	0.0		0.009695780086265938	3.2607732828032003	0.0	368.0596998751	0.17636457260565785	0.0
1159687	0.0	0.990217357874	1.57652870106	4.70241013925	0.0	0.23137254902	0.0	0.2939001071432205	0.0054710523971685	9.771655602064	11.95906075609	48.49063708269	0.29414598891814725	0.3239139593890269
1158973	0.920496168335	0.0	0.0	0.0	0.0	1.0	0.0	1.0000000000019935	0.44523524759926497	0.0063540001865500005	0.0063540001865500005	0.0063540001865500005	0.9825145711906744	0.971568008033773
1157517	0.0835875593296	1.5957712428600002	1.3092535976000002	90.0805090576	0.0	0.14353235559900002	0.0	0.10137739476138248	0.07110976744452184	6.5520185297533	5.404381967089112	181.76333642988232	0.23570840875439525	0.12195991808389513
1157969	0.021322167831700004	0.00830731540918	0.668459991401	19.938315184500002	0.0	0.00168067226891	0.0	0.14987676697902744	0.021322167831700004	32.22051964461658	34.097184502202	331.705588608604	0.10855825076850664	0.16910617100824535
1157315	0.0	0.0		1.23698903726	0.0	0.0	0.0		0.0	1.05477839635	0.926748629427	29.830625622259998	0.047280593325133034	0.07117373134710576
1159421	0.083165427355	0.0	0.0	0.0	0.0	0.193253012048	0.0	0.15409583928069684	0.2710141369682669	0.0063540001865500005	0.0063540001865500005	0.0063540001865500005	0.5930030421554842	0.5660220786353841
1158977	1.0	0.0	0.0	0.0	0.0	1.0	0.0	0.999999999979766	0.2786775991433312	0.0063540001865500005	0.0063540001865500005	0.0063540001865500005	0.9817073170731708	0.9702553812266936
1157607	0.00622122383815	0.0974697183701		63.343661061899994	0.0	0.0356630824373	0.0		0.00622122383815	9.0553657364111	9.744607418808	365.16207014639997	0.10074645070008964	0.11914484185277345
1159243	0.009394451951709999	0.00646900391439	0.005954424057560001	0.541468569798	0.0	0.0698314413485	0.0	0.05702336070623454	0.006590667059472606	0.035350569443840005	0.0273790278443	0.7233902814119999	0.2941739442519993	0.265798665089285
1157329	0.00566090850242	0.0		4.14011685702	0.0	0.0	0.0		0.00566090850242	3.396578166768	0.0	118.06365235712002	0.09825186144412372	0.0
1158121	0.026637085474	0.0		28.1956760869	0.0	0.00306983883346	0.0		0.026637085474	4.931945189284621	1.5990705801212999	85.1306557705667	0.1901024454724108	0.124714426391785
1158095	0.0117126180445	0.280801918125	0.191361307167	1.45958732718	0.0	0.192887931034	0.0	0.143401386787374	0.009331254994822664	20.469117801533	4.1283387058260015	277.653545778044	0.25450851954705617	0.17094680624692601
1157319	0.0112203485889	0.0173563578865		65.0449404801	0.0	0.0162976085031	0.0		0.0112203485889	7.43930876789348	0.0	256.791031832091	0.12559028558590796	0.0
1159031	0.00566725528048	0.8371912495280001		36.8657536812	0.0	0.06683548189069999	0.0		0.005667255280479999	6.111511695308	0.0	160.7654314102	0.12263911546142205	0.0
1159399	0.0009189028651610001	0.053621217746699985	0.0567088380922	8.0081300176	0.0	0.0593293207223	0.0	0.0401755683672983	0.000918902865161	24.4201693359867	11.497532325952196	110.5427347904	0.6237348576225179	0.6180472788968631
1157485	0.0260256793341	0.16480491484999998	0.6175507686280001	255.710327344	0.0	0.0150829562594	0.0	0.1155269136195226	0.0260256793341	6.1973572391774	6.545441150039	975.659628509104	0.12694289301614134	0.14461347701172866
1159247	0.006454219407160001	0.0301396773284	0.140567843133	6.357245529	0.0	0.08714452020619999	0.0	0.08840960143841331	0.003492236236412587	0.03909965125785	0.14780474515294	6.509909700183001	0.20524601119388827	0.1930877685037542
1159085	0.00357264322472	0.0	0.8317837390639999	89.3290452383	0.0	0.0	0.0	0.04585432604649351	0.003572643224719999	0.15036668488	0.9283392537980999	248.8888936823	0.1226260641779273	0.08496116949219493
1157995	0.0201472743657	0.289269717236		18.726522433299998	0.0	0.102818705958	0.0		0.011888708772533372	0.7250380893974411	0.0	83.30142680319	0.29010776123023546	0.0
1157529	0.263873943709	0.0194568528823	0.005136740917810001	0.0194568528823	0.0	1.0	0.0	0.4625264036580325	0.07776699662720465	4.8973711987823	4.05528453425781	73.0892268049823	0.3798271423315182	0.1326879496383606
1159053	0.0011805610747299999	0.199738958851	0.0610313485377	11.5511100221	0.0	0.0222130810366	0.0	0.0058658573432341	0.0011805610747299999	23.030779501551	6.457163981571702	274.35279839188	0.30625886165680555	0.12742633799033834
1158017	0.00856426750163	1.27945164204		14.7960401933	0.0	0.115520282187	0.0		0.00856426750163	7.50590875155	0.0	46.3134289398	0.20059450086692207	3.2697276999891015e-08
1158883	0.0	0.0		0.00256621075096	0.0	0.0	0.0		0.0	0.35680978953270004	0.3437155011637	1.60853514409766	0.19233892799151084	0.18672137757001644
1157765	0.7311320407649999	0.183390228747	0.0856434265443	0.187124418153	0.0	0.968680089485	0.0	0.3422785070261848	0.2760454036822518	6.652096719797	1.4100548027503002	43.44226824103301	0.4716547806119318	0.1907382596013328
1158029	0.0165658089748	5.76329129226		87.44626947450001	0.0	0.182730680856	0.0		0.013160728636973595	12.911444521295655	1.4273676911696551	156.36294245605566	0.3059707154236741	0.08357391526548975
1159153	0.005458165207090001	0.0131298974156	0.608700562385	81.9986161817	0.0	0.0056882821387900006	0.0	0.08572712971617896	0.005458165207090001	44.92539469641561	46.524341133885	408.42196278669996	0.12372280817394254	0.12633443555107318
1158963	0.497868273155	0.741005535063	0.707394170196	1.10368619324	0.0	0.79603960396	0.0	0.7430633350388637	0.6660012823715259	2.5178462015757	0.9979946283557	6.661830030092701	0.7128205128204548	0.607823102133495
1158089	0.0805437667429	0.0		75.075800656	0.0	0.00163666121113	0.0		0.02409625906689952	44.27330086702	56.750712212299995	1687.8577647860004	0.17707027383702506	0.14999954064701926
1157459	0.0102866653324	0.0		31.8252898263	0.0	0.0	0.0		0.010286665332400002	31.586771976378998	33.583995830675995	353.94118117229993	0.06729131175462927	0.0826429070241108
1158893	0.0261993488914	0.630492925993	0.259265952947	18.5076431964	0.0	0.124322548859	0.0	0.07269526669134496	0.018423904469582808	2.4641110829280004	1.130644473276	47.40769985075	0.27401392111380085	0.2183485466402282
1157367	0.0573386310255	0.390593433403	0.118496540163	5.700502716059999	0.0	0.354954954955	0.0	0.08042304578090244	0.041321587058867175	16.075635097272	0.8837292606489999	28.029808589274996	0.4237606162352346	0.12841335639920468
1159039	0.004563949211640001	0.0852974632508	0.0347107812122	2.54148200712	0.0	0.137535816619	0.0	0.08915109622053956	0.002457112006224236	59.5379575629287	9.546701185466805	133.229752437122	0.5265824029903576	0.3503994074845419
1159231	0.004985316473979999	0.249047723568	0.351168727557	90.0097793525	0.0	0.0638063503429	0.0	0.0815129939997231	0.0046777033440902225	0.268969315168	0.3653564293238	90.03903689293102	0.12784211770272338	0.13786388034453592
1157455	0.0340058142703	10.7341594515		40.8335626062	0.0	0.241610738255	0.0		0.01749978556829584	12.16183624503	0.430851159899	81.77815618540002	0.2367945291623589	0.06023862190857771
1158015	0.00807025893934	0.938645709342	1.46731228634	120.644974804	0.0	0.0608249538272	0.0	0.06584478481393727	0.00807025893934	18.049341927842	16.402771428439998	260.668091726	0.16009069177114155	0.1633333668091307
1158965	0.532663830797	0.0	0.0	0.0	0.0	0.704225352113	0.0	0.6631131341980523	0.2775525419227437	0.0063540001865500005	0.0063540001865500005	0.0063540001865500005	0.8050383351588372	0.7607846909980754
1157791	0.004838806152680001	0.0567132575961		29.8613818398	0.0	0.0355248352355	0.0		0.004838806152680001	1.9769255470624	0.6305165438091601	75.44635019439	0.12940333408778215	0.06889005638562691
1159125	0.00121272387184	1.81287247268		35.7475366437	0.0	0.0563620836892	0.0		0.0012127238718399995	21.774787255411	0.0	218.9454129148	0.15841147593984614	0.0
1158881	0.0202857156515	0.544241571653	0.209788528133	28.0212360856	0.0	0.21059038344500008	0.0	0.10199716806526182	0.018304805855608532	46.19336212832	13.414191314814	112.204114882647	0.574157693643751	0.4067496472698493
1157597	0.008952268268870002	0.507332679234	5.96408281321	147.900014028	0.0	0.035016161305199994	0.0	0.08028559803634508	0.007864403474735495	5.690434455565	18.070711129348	372.8196718685	0.093594399311112	0.15495574930192013
1157487	0.007482665163229998	31.4774852852	32.5899713095	235.22989437099997	0.0	0.118891320204	0.0	0.1543201933851709	0.007989895091848198	37.510037609527394	38.517861690911005	955.179195536104	0.1525152926135767	0.1534785759196182
1157777	0.0787119513408	0.526243594708	0.359842458041	0.7051248166240001	0.0	0.761772853186	0.0	0.5283241524704891	0.011197049942744132	20.188315883408002	3.9369773986590006	276.19395845086405	0.25697408700879537	0.17204895557036254
1159413	0.000530763941921	0.097737263437	0.0461254860711	1.76213195598	0.0	0.0829554995802	0.0	0.038206832983053836	0.000530763941921	8.454687939087004	12.8497190508711	88.92047559868	0.4561219231836212	0.472775572162737
1157637	0.006482126588090001	0.0		144.309997951	0.0	0.0	0.0		0.006482126588090001	7.2421883765100015	0.382015550007	213.2076413936	0.06801411613730549	0.03226024076923291
1157549	0.0373533456737	0.16998878128699998	0.0912230268659	432.012386739	0.0	0.0614491593275	0.0	0.0547717830310994	0.023880199997741425	386.76482671628685	538.975783424866	17162.386690039	0.09408274785365817	0.10604715037463604
1157799	0.007522148492279998	0.0777228371662	0.101963824301	150.787221522	0.0	0.121928746929	0.0	0.1152509198311631	0.011906552307421922	5.883381053817001	3.69996214694884	302.4445601925001	0.2195361911455097	0.15162941088965104
1158951	0.0158717663853	0.952725042065	0.6595076564410001	25.8077622968	0.0	0.147374062165	0.0	0.07486396298716777	0.0158717663853	2.8089281082750004	1.3690238824934	41.256460183140995	0.5533222471261087	0.4404951186480206
1157375	0.008740587400260002	0.014870790008	35.253592742399995	608.652041236	0.0	0.00548210254757	0.0	0.06717914848531513	0.008740587400260002	1.251269980978	36.405840736550005	672.4292881455999	0.1037114779120632	0.1130524267256815
1157567	0.00694765125949	0.28773607433000004	2.2593614552	155.838994008	0.0	0.0406858202039	0.0	0.08024091259022616	0.00694765125949	11.833669118230002	9.724598788989999	220.80356868119998	0.13899223982142833	0.16957422955523893
1159331	0.0244322666659	2.18993111176	0.6837849418080001	25.0499407385	0.0	0.114062561947	0.0	0.0575644125921248	0.0244322666659	15.78216939173472	3.3775014291212404	73.00455384455	0.2247184385868096	0.11056235633423084
1157571	0.130696794194	4.8779143459	4.05014779334	73.0697699521	0.0	0.375809735332	0.0	0.1305512948371967	0.08762469313699904	5.210438772414	4.261529924316	74.68636355561	0.40366225839238395	0.16823671364046547
1159689	0.204831421459	0.0		0.0	0.0	0.134387351779	0.0		0.015690946047873	9.065648493590286	7.4462564099282895	91.49590810276527	0.21117582607670365	0.2270820780936431
1157711	0.00493458566072	0.12208603989	0.194731487922	7.106500118169999	0.0	0.0270488494146	0.0	0.056341807081811135	0.00493458566072	10.85707085819	8.779010063792	275.47426357517	0.1026305098517884	0.09247951598559287
1157625	0.011526029940400001	0.826795886678	0.6088591687730001	47.04319775850001	0.0	0.119952727989	0.0	0.0817521465297471	0.007950781088956	14.528325967422301	8.8970779979573	201.8885992913443	0.16036960985602852	0.15951271766674124
1157615	0.010360638073899999	204.116500541	239.04100471200002	2571.12397869	0.0	0.162425149701	0.0	0.19258087762770326	0.006877489458504779	289.060251015589	426.4302450383471	4592.804399299001	0.21889707841254247	0.2673117295822893
1159345	0.015474914668299996	15.6777239349	108.00966575	5071.61583585	0.0	0.0724072267893	0.0	0.1293238194698539	0.015474914668299996	26.752807553527003	119.17035370041201	5172.40565327493	0.18027299223747228	0.19202154471515528
1158071	0.0752929625996	0.07363511389119999	0.167352531571	2.3010973091	0.0	0.0969899665552	0.0	0.14266675997820408	0.02633381610186952	1.7340589355401999	2.014196158673	86.90854862340002	0.14883423826293565	0.13979958558820468
1157783	0.00605944003332	2.92448061157		39.0972130603	0.0	0.0290037831021	0.0		0.00605944003332	8.68777190383	0.0	126.54348253479999	0.13290828837649915	0.0
1157795	0.0008750756175739999	0.0029451387235900003		1.23821260734	0.0	0.0684931506849	0.0		0.041964455321249684	4.92668841200461	1.5990705801212999	56.37863435067071	0.21488618116539607	0.14258462426052382
1157619	0.061944188881299996	0.180725091799		7.94120465518	0.0	0.121655912419	0.0		0.06344745099930375	1.2702551051395	0.0	24.53450848783001	0.17589189189159285	0.0
1159145	0.0171864526072	1.17570038751	1.1475867164	306.646912002	0.0	0.137026239067	0.0	0.1225960639434993	0.014969055350864643	3.197260951743	2.55233257059	381.99110050127405	0.3395924463883814	0.2533223740231585
1158979	0.5576890648749999	0.0	0.0	0.0	0.0	1.0	0.0	1.00000000001597	0.2779726732649063	0.0063540001865500005	0.0063540001865500005	0.0063540001865500005	0.9818574514038876	0.9704995055278812
1157815	0.011916144298799999	0.0336155846016		33.3129838499	0.0	0.0163206871868	0.0		0.011916144298799999	6.440758779171599	0.0	148.99287832090005	0.11971036856790625	0.0
1157557	0.00015195542199899998	0.0		26.251177451700002	0.0	0.0	0.0		0.00015195542199899998	1.0841297915093089	0.0	40.79255032403661	0.13802269706571016	0.0
1159063	0.00013737042252000002	3.92199290218e-05		9.32966283431	0.0	0.0007017543859649999	0.0		0.00013737042252000002	3.9027388081290217	0.410118140568	21.84546034241	0.12622084338701806	0.053473068134198234
1157515	0.00580990850859	0.0		234.424534842	0.0	0.0	0.0		0.00580990850859	0.16998878128699998	0.0912230268659	666.436921581	0.03520238504760806	0.03137711592975262
1157603	0.312760606986	0.000380439731089		0.0015579912797	0.0	0.333333333333	0.0		0.05441378748710275	1.0726876203033089	0.0	12.479639397966602	0.3497989661113645	0.0
1159219	0.00010752995052	0.384138641268		39.1789335686	0.0	0.0637403460749	0.0		8.651961487210572e-05	11.450061331268001	11.940109098599999	259.3353059616	0.10906072106272942	0.04649781331215018
1157665	0.075646080798	0.0801429406092		14.5997657366	0.0	0.203101920236	0.0		0.04322641777413185	0.3130660580704	0.0	28.152019337446397	0.16860208731409654	0.0
1159307	0.575609051624	0.7596317457790001	0.70311422825	0.912284664548	0.0	0.8394345777459999	0.0	0.7337853887164901	0.11139099419412192	11.997287877079	3.4902317977200004	127.073928243548	0.3164768192696749	0.17833999282337226
1158087	0.024866700301799997	0.0		93.93499353690001	0.0	0.0	0.0		0.0014031800504421268	5.48897839226901	83.256718394347	2176.8383435559	0.24715969989285874	0.3035998388195687
1158999	0.428627227453	0.905113164205	0.309603960835	5.5344647715	0.0	0.56390593047	0.0	0.4721267553947486	0.06778197316444122	2.929329264984	2.314487453874	8.498433872128999	0.7082463465550692	0.6489986020568941
1157447	0.278759566674	0.0973649775842	0.08573930861889999	0.970228142382	0.0	0.39489194499	0.0	0.3422820720452426	0.041888009287679474	2.8537378067242	2.2791812153829	107.73667738998199	0.15974427544739842	0.14191701663070214
1157719	0.0	0.0		0.334095223028	0.0	0.00698924731183	0.0		0.0	1.9480484110937104	0.0	52.800745426398	0.08262854873927483	0.0
1157753	0.00646096528572	0.00478312025371		3.97627087687	0.0	0.0739401076716	0.0		0.004921063257088632	1.9480484110937104	0.0	52.46665020337	0.09573724668057904	0.0
1159707	0.0294664992692	0.0	0.15907437697	19.333827560899998	0.0	0.0	0.0	0.02643403597692984	0.0294664992692	0.4411627036536468	2.2860903885390096	129.1298884790674	0.1163692785104226	0.18832925709756976
1158969	0.0978842026217	7.118515738010001	4.64912385633	51.831901208299996	0.0	0.463245805432	0.0	0.4054634007132603	0.08678802346003893	9.636361939585699	5.6471184846857	58.49373123839271	0.5036273852341955	0.4343396419781555
1159215	0.00023469918772599997	0.0		0.672501682653	0.0	0.000645994832041	0.0		0.00023469918772599997	2.64747073123029	0.17473343823829002	55.86722719241829	0.07781674704067862	0.03430694110084311
1158011	0.0238921214215	0.108842212387		47.5252516479	0.0	0.0486951228791	0.0		0.0238921214215	2.7864825016475	0.0	79.34526745535	0.17272562381793424	0.0
1158543	0.0	0.000828995303891		1.6494865035600002	0.0	0.0075376884422099985	0.0		0.0	0.249876718871891	0.351168727557	91.65926585606	0.0603343582853602	0.07648332991684828
1157681	0.463146744123	0.027440188569	0.0258721777936	0.0521363582811	0.0	0.680203045685	0.0	0.3793642359088316	0.5829778969242726	0.8395279265819999	0.6346517143685999	16.585658219581102	0.2502227400450472	0.11458297622250645
1159087	0.00883202286505	4.856452002769999	0.0928235510364	193.32034394299998	0.0	0.109237536657	0.0	0.02585480603459288	0.00883202286505	13.500874010495	1.5573657434438	214.68448322330002	0.4856096730244386	0.3869135900986855
1159719	0.0	0.00859954254702		0.0483421222307	0.0	0.242424242424	0.0	0.0014943971220832885	0.04111120391915404	4.923743273281019	1.5990705801212999	55.140421743330705	0.21590260604889208	0.1435746069094698
1159381	0.0106423524835	20.4452739971	5.2938803685	151.683750744	0.0	0.186905215074	0.0	0.10039603013666228	0.008502877121093216	24.93439668628	7.07108623878	208.5987499279	0.4734569469138139	0.4509665566370546
1159223	0.00524389414659	2.38678427483		35.183412073	0.0	0.07998497934660001	0.0		0.01106345116877842	9.065648493590286	7.4462564099282895	91.49590810276527	0.2123127340821647	0.2304441898538077
1159239	0.0	0.0		0.0	0.0	0.0	0.0		0.0	0.0007351140811810001	0.0007351140811810001	0.0007351140811810001	0.07282022152796411	0.05934542078444295
1159023	0.0152426462783	2.58182017243	3.91973686809	790.668029433	0.0	0.047863629596499986	0.0	0.04485660679294149	0.0152426462783	5.511149437414	6.234224321964001	799.1664633051289	0.19442835630710106	0.1789393199778984
1158037	0.00830723468139	0.00698027436738		0.122249129461	0.0	0.192258064516	0.0		0.010868687642121145	7.42195241000698	0.0	191.746091351991	0.1763979247304728	0.0
1157365	0.07600103489360001	2.87093118897		24.247714355	0.0	0.326590538336	0.0		0.02309645005507485	18.555972852839	0.7652327204860001	46.577020228215	0.4078604893282796	0.10119809783733676
1157703	0.180603097561	0.812087738013	0.608779536575	16.533521861300002	0.0	0.244337918577	0.0	0.11095911154568233	0.07952963854874334	1.841341779513	1.3625592548780001	20.32206345815	0.3031229303579002	0.1802414236119832
1157313	0.0054864338718700004	0.0		10.7064115589	0.0	0.0	0.0		0.0054864338718700004	1.45625712879	1.28731729692	116.8665677759	0.09998840041742653	0.08061932620607884
1157933	0.061815791427499996	3.49330423015	4.05563011881	106.48100706299999	0.0	0.120387285349	0.0	0.11243375264053726	0.05042506693988763	3.704110824511	4.1770400815789985	112.62632937472999	0.14982538718498664	0.12423869944890358
1159131	0.0262289860326	1.54344706998	0.983045929097	74.4120078191	0.0	0.407527086105	0.0	0.2461368399810293	0.01615301248794655	2.2967800789588	1.836321551396	76.92841156675698	0.575076373277883	0.4927849763340724
1157343	0.0249918066585	4.0703510656800015	0.628069625323	35.5113083244	0.0	0.263996977711	0.0	0.11354470809671835	0.021751303600004084	8.171629934013001	1.7701499179070002	64.033658143	0.3001393504130394	0.1139606977308537
1157673	0.0075386848038	0.0		767.619715265	0.0	0.0	0.0		0.0075386848038	4.94460629752	15.2908955768	2011.854525791	0.03468208092488091	0.04368831827643499
5276492	0.0	0.0		14.4826530814	0.0	0.0645161290323	0.0		0.008670818353729027	0.217437478015	0.220114546828	189.3462721764	0.3591291226555016	0.4033374734168449
1157689	0.0322143218446	7.2421883765100015	0.382015550007	68.8976434426	0.0	0.0896785109983	0.0	0.04253602812085405	0.025997978235953213	26.20320308421	37.743582523807	1060.6023302796	0.1649793340456812	0.1568778925994375
1157345	0.0156608695075	0.492370484048		18.738503284700002	0.0	0.0621387283237	0.0		0.012158535747035362	6.267509355738	0.0	138.17124985510003	0.14300192561088626	0.0
1158021	0.0997888909288	0.918241300387		9.90415668862	0.0	0.136382623225	0.0		0.0589375130425009	7.144698409897	0.0	41.42154543512	0.2609008720697243	5.2803787202400186e-08
1159051	0.00373274286218	1.39580280078	0.19078674051	21.685223816599997	0.0	0.108164263016	0.0	0.02070804813267304	0.00373274286218	4.496988393913	0.774540123268	30.56901773598	0.3724250681197232	0.2262775815023569
1158921	0.0269290491599	0.297481347166	0.284387058797	1.54664049098	0.0	0.125811378389	0.0	0.11625357319758305	0.022325792893250426	2.1336504560454	0.6343159593234	7.1641127701994005	0.3092617781626905	0.26848221508489034
1157583	0.159597377667	0.332524426514	0.2113821309760001	1.61659360351	0.0	0.480071084031	0.0	0.2716204748966529	0.1049916806338958	1.4302026731014	1.2283829954975	28.558943346889702	0.33625057577168754	0.17754801485835994
1159217	0.0014763678675	0.210476591223		18.3376937919	0.0	0.131962706192	0.0		0.0005842064884828777	11.276399281222998	11.940109098599999	238.49406618490002	0.14626845816172146	0.06519714677531767
1157697	0.0062161121477299994	0.0506227975711		11.3751764996	0.0	0.00970350404313	0.0		0.0062161121477299994	7.1953212074680994	0.0	52.796721934720004	0.2034055154543461	4.071778248151028e-08
1157661	0.00978164700106	0.08227777854519999		37.8702492825	0.0	0.0412965964344	0.0		0.00978164700106	0.31780651591762	0.0	54.246747601313	0.07770098785672895	0.0
1157727	0.403282553785	1.0292540415	0.7537797183030001	3.78854159685	0.0	0.4647564469910001	0.0	0.37073800429628784	0.2399910925343884	1.06924958910234	0.7605709379857801	5.03594600219079	0.5375706604161273	0.3838739284210476
1157647	0.0718606575498	0.012031752929		1.94781933017	0.0	0.115075107296	0.0		0.04379403532175946	0.2449548703902001	0.0	15.5000729310164	0.14176746213334893	0.0
1159111	0.0107846339995	7.78928912425	4.02356999448	456.36507661900004	0.0	0.101211288711	0.0	0.10792214101642016	0.0107846339995	22.417252324303004	7.306885222022999	489.22897504127405	0.2485752205478183	0.20262779403189096
1158903	0.00443723675818	1.2678238173799998		130.170427651	0.0	0.069194141402	0.0		0.00443723675818	5.41452423748	0.0	166.101967514479	0.11114855107339476	0.0
1157473	0.0187826014094	0.506123270607	0.989326973795	80.9086187874	0.0	0.0327040132054	0.0	0.058400815963414114	0.0187826014094	2.2401822061472	3.003523132468	167.8171674108	0.1093086133644949	0.1120950217350815
1159711	0.0975818640578	0.000336565455655	0.000336565455655	0.000336565455655	0.0	1.0	0.0	0.9384585521560171	0.03914880929012458	1.023542429645655	0.30179952199965504	27.315417703155646	0.5693497881747251	0.3388402384339519
1157645	0.0399065145185	0.00516309596242		0.898638786843	0.0	0.160909856782	0.0		0.011934200440934873	0.2355287373724201	0.0	16.376498318813	0.132829373649918	0.0
1159171	0.0	0.0		7.316207614810001	0.0	0.0	0.0		0.0	20.4452739971	5.2938803685	158.99995835881	0.1493309002431259	0.08021300826308145
1158115	0.0330966500178	0.0		1.60811551847	0.0	0.0	0.0		0.0330966500178	2.02500031097	2.29854246415	151.83658166547	0.0543531554248327	0.06511269572165246
1157621	0.0059298820038399995	1.56313468525		10.532548627999999	0.0	0.0877419354839	0.0		0.0056062868436687185	1.7584490060292002	0.0	18.4959666822264	0.11015888665562698	0.0
1157655	0.13507832554000002	0.0236307042505		4.12406124885	0.0	0.369629193643	0.0		0.036619877842287735	2.6776402892605	0.0	31.820015807449998	0.236777996070944	0.0
1158945	0.369128523155	0.0	0.0	0.0	0.0	0.447619047619	0.0	0.4629393810859017	0.4625552045100501	0.0063540001865500005	0.0063540001865500005	0.0063540001865500005	0.5781158572263533	0.5554665069144014
1157413	0.461938145312	0.177413257887	0.0483441611286	0.21896967206	0.0	0.606653620352	0.0	0.4094462513668478	0.16522047212877836	22.951446419787	1.5076334882586002	84.51670139356	0.28879283342682355	0.09762845107968822
1159191	0.00116192785924	0.864779893309	0.17581565771299998	85.7833050961	0.0	0.0818841212969	0.0	0.035285355931860225	0.00116192785924	71.94557045933121	32.70950206902521	761.842111648632	0.2509468245800269	0.21527302959142536
1158023	0.051670419433699995	1.49728928511		33.1879569739	0.0	0.236354695951	0.0		0.0409559848746774	1.7112319726318002	0.0856434265443	33.4114048708186	0.3015640988155183	0.044698003402829936
1157743	0.138390627598	6.22645710951		31.5173887465	0.0	0.338218129944	0.0	8.559130284564908e-08	0.1236034354088545	6.44195950634699	0.0856434265443	31.74239635273379	0.4190776593428326	0.06666140360021787
1157589	0.0178623550422	0.358569380158		149.69508420100001	0.0	0.0597288202692	0.0		0.0178623550422	1.3909975233835	0.979240406217	176.5655525403496	0.16650256792371326	0.06902049287266797
1158895	0.0	0.061608787626	0.0170868121932	3.69564153755	0.0	0.152380952381	0.0	0.0416099944850692	0.0	5.575011535595999	3.4454998919732005	42.071410401550004	0.19597989949749747	0.10805597386471748
1157585	0.004930882032	0.017469035985400002		59.3435445826	0.0	0.0154856084834	0.0		0.004930882032	1.5951929502156001	0.0	69.8983066096464	0.0712241481721557	0.0
1157685	0.0202306153066	1.26807745846	0.0264302712458	46.8899921527	0.0	0.0226471134212	0.0	0.010855917179957993	0.0202306153066	2.106406204928	0.6562320290538001	79.3937333509	0.15815346800806485	0.11918125976749824
1157787	0.057588439286699995	0.0		0.392662837752	0.0	0.0	0.0		0.02784683602862618	4.931945189284621	1.5990705801212999	56.934979683666704	0.2126654939355673	0.13975959791187534
1159245	0.00804727205249	0.0505159707973	0.07281267514919999	56.4995732802	0.0	0.0335132703554	0.0	0.04688373587070214	0.00804727205249	17.72789612710189	25.7637875766613	180.64985687196662	0.270992366412139	0.2668282441202562
1157357	0.0313808485211	0.480713853343	0.125519203684	11.2284877499	0.0	0.423617846751	0.0	0.1065286438506664	0.01360882992484255	2.8893211873599	0.698944489014	24.0699611762212	0.4355327825997504	0.10759767601090524
1159105	0.0004650376097300001	0.00180256081512		19.9207046612	0.0	0.00846891018498	0.0		0.0004650376097300001	1.45265996852512	0.051265991191	58.265347636899996	0.11543862934184865	0.02538574209786464
1157599	0.0056961382803299996	3.16277230356	3.68454506329	42.506538999600004	0.0	0.13141025640999998	0.0	0.16941949622898342	0.006301410177807287	8.345874079890999	15.791173379427994	267.42619684010003	0.14458879165071176	0.2113755069343352
1159309	0.017079763166200003	0.948864027858	0.7391820217020001	10.3290289686	0.0	0.14135021097	0.0	0.1056571063536633	0.01442888651260146	3.0324765199607886	2.0783611386097904	26.27087737340079	0.4328804347822514	0.3680381796573002
1157623	0.179933374559	0.0145892289802		0.022213399046400004	0.0	0.780898876404	0.0		0.05096520062474082	0.19531432077920002	0.0	7.963418054226401	0.13005511416471113	0.0
1158119	0.045968627993	0.0		9.50992494211	0.0	0.0	0.0		0.045968627993	0.023252396255	0.10709262224523	52.399852383059	0.053840265373828994	0.061635464771713014
1157539	0.00313989975315	0.0		15.9170683699	0.0	0.0	0.0		0.00313989975315	0.507332679234	5.96408281321	163.81708239789998	0.028462404604014058	0.06525904296786363
1158897	0.035405530763800014	0.289100798516	0.167727138571	83.1735896537	0.0	0.336524822695	0.0	0.20764949585127546	0.014274885755373171	5.8025035464859975	3.596140218351	121.5493585177	0.2534764349043201	0.16552134652692194
1159067	0.128936089721	0.0	1.04316937752	5.28038217924	0.0	0.0	0.0	0.14705892952612926	0.0530837956873768	1.3130919143806468	2.9699920262810093	111.15676239869741	0.27983468228004543	0.3333830751795223
1158987	1.0	0.0	0.0	0.0	0.0	1.0	0.0	1.000000000006252	0.18909092190028587	0.27695843906279	0.21875708401779	2.81173834560079	0.8468792096989328	0.804767492315899
1158889	0.167017144385	0.719462877139	0.8076075141869999	4.36662818941	0.0	0.418479974771	0.0	0.4665861695152741	0.030201539621047907	13.176627746361001	4.560066210654	135.503145256088	0.3324706383392883	0.19160485475629185
1158019	0.0125547663937	1.95430486461	0.519456930851	517.464993436	0.0	0.0726513190755	0.0	0.0395129658389119	0.0125547663937	2.324283170457	0.79100599801984	781.5337847645	0.10427392622894596	0.06488084187512233
1159411	0.0011632559492799999	0.8369279011190001	0.481865135953	65.9623330192	0.0	0.103654814589	0.0	0.04221245378167519	0.0011632559492799999	71.9177184671412	33.015551547265204	742.0211395717322	0.21908086289037668	0.17430120482569667
1159129	0.0104353689256	4.711327335219999	4.43381767441	49.396762789300006	0.0	0.110473597199	0.0	0.0890258615929856	0.0104353689256	19.339290535272998	7.717132901953001	82.26066121157402	0.29585114407824736	0.22016046023387825
1159193	0.0	0.0260537966315	0.04178503203	1.54841760285	0.0	0.055776892430300005	0.0	0.088146806143346	0.0	43.639000117357405	24.209111997000537	233.12977720538788	0.4458510601499576	0.4241280765436197
1158867	0.284637523841	0.023533564613900004	0.0192446677247	0.159261723049	0.0	0.257731958763	0.0	0.2182057590270162	0.023349369284913518	0.1007459402463	0.0972592411126	5.779746426039	0.1794957701651794	0.17036490797743828
1159249	0.00310750352027	0.0		0.144758919159	0.0	0.0	0.0		0.00310750352027	0.02639059551439	0.02014212582436	0.7154850293880001	0.12329838835870842	0.09781444516751556
1157669	0.00155827071103	5.48732272908	82.75414524600001	1540.74067121	0.0	0.0819484240688	0.0	0.18309080517689366	0.0014674634715171474	5.52157732099201	83.2878258688147	2101.818078165	0.2634256642171249	0.3144727503896487
1159071	0.042093824859499994	5.27432044578		123.89967772899999	0.0	0.172610458325	0.0		0.0248847962296726	9.196363137163802	0.0	138.230163781411	0.2481227824078797	0.0
1158869	0.00870426212055	0.0490146253433	0.008468495478159999	4.85830880899	0.0	0.182425978988	0.0	0.03219104205922073	0.00539564880517861	1.9202122894663	0.6305165438091601	45.58496835459	0.1581826245505056	0.0900089171146953
1158117	0.0180737244733	0.0		16.8138275433	0.0	0.0	0.0		0.0180737244733	0.289022690806	0.177369757221	147.5038992673	0.057884499295728926	0.037586365974883136
1158959	0.30608655773000004	0.0	0.0	0.0	0.0	0.488599348534	0.0	0.4344572771199717	0.2734518171072417	0.0063540001865500005	0.0063540001865500005	0.0063540001865500005	0.9212504946576724	0.9042678034715438
1157533	0.013329915091600001	2.02500031097	2.29854246415	150.228466147	0.0	0.0601270726794	0.0	0.07202959529041006	0.015228086527043038	2.9316133659609998	3.180977806985	227.8304222291	0.09561797752803004	0.10777592098872016
1159407	0.00161456128856	0.299537787214	0.155412359163	9.78343094578	0.0	0.112837947224	0.0	0.057635938837628485	0.00161456128856	71.3534133636605	32.662183780899504	685.8153225087364	0.27659785383245195	0.2409780076077198
1158911	0.12518613350500002	35.9512345808	11.167909025	55.75601283020001	0.0	0.702061211743	0.0	0.3520520275090518	0.0704333509861666	46.595178294326	14.15046052434	85.12893653470601	0.785952557450071	0.6403786363692585
1157693	0.0173531461735	0.928782098665		36.6976034624	0.0	0.0842959725258	0.0		0.0173531461735	1.109507190464	0.0	44.63880811757999	0.10631569951267753	0.0
1158863	0.00662893416182	0.21630611131	0.194541486853	18.503595259	0.0	0.327974276527	0.0	0.26083750057885136	0.00824504753456171	5.625731418205	2.2037113791719998	67.30957392805	0.4010634970283261	0.3399086631708689
1157809	0.027813675392	2.77060106816	3.2767350681700003	174.681986962	0.0	0.06021585411240001	0.0	0.05400109390985471	0.027813675392	7.881757863639	6.346690632664	601.824474484363	0.11327504815924384	0.09379906860263793
1158985	0.691537616246	0.0	0.0	0.0	0.0	1.0	0.0	0.9999999999995663	0.29314773052948345	0.27695843906279	0.21875708401779	2.81173834560079	0.8525086505188251	0.8119451580395631
1159717	0.015358601226399999	0.0031546701648	0.00185810429684	30.107980152800003	0.0	0.042471042471	0.0	0.03424051719497579	0.011941562122991477	5.8056582166508	3.59799832264784	151.6573386705	0.2484964461454145	0.1624229562592917
1157347	0.005085784619520001	3.62056501499	1.0165610889	17.293862068699998	0.0	0.27636643572	0.0	0.14179396409703818	0.023212673410348425	4.1025325711272	1.142080292584	28.5236035213942	0.3892469158536925	0.11480657090815705
1157819	0.0153131679067	1.94326529084		48.4903793265	0.0	0.122794194424	0.0		0.011578870801740864	4.2504432989231	0.0	166.149723405486	0.16019371379754382	0.0
1157827	0.00142304031221	1.6667607870200003		64.3108899051	0.0	0.08537842854199999	0.0		0.007905353165293064	3.0954231728242005	0.0	111.82414310809999	0.18876354294658865	0.0
1157465	0.022174275188700004	0.142070900649	0.203902960522	221.77760058200002	0.0	0.0342877341817	0.0	0.04573196356066868	0.017919476638758727	3.4172807680690003	3.409711260682	402.16287339400003	0.08474576271169712	0.07807512644569597
1157751	0.0267701709798	0.0		0.410253012949	0.0	0.0	0.0	0.00018573473410322198	0.03702327951809958	0.567493967908	0.31688115037823	70.91116352654899	0.09648241206032747	0.08174373366983816
1158997	0.118814870662	2.24181520932		117.37862681899999	0.0	0.188545861298	0.0		0.07019205734579845	2.744369171942	0.0	144.8221544775	0.22407120743060446	0.0
1159165	0.00164742056328	0.054577601607900005		14.525677943	0.0	0.016272762495200002	0.0		0.00164742056328	8.5440533328179	6.65301749081	288.453979446	0.1113741486690224	0.07559343793520854
1158013	0.0264173660231	0.08201059712160001		16.7007229741	0.0	0.0816296728972	0.0		0.0264173660231	0.8940983351345999	0.608779536575	33.23424483540001	0.1376776910926492	0.038222022964355326
1157605	0.039208828554	0.0449509380123		11.9320793701	0.0	0.15081129139799998	0.0		0.0200700127457118	1.11725811858452	0.0	24.410160776786903	0.2043771865591927	0.0
1157341	0.0771430071456	1.6117514872299998	1.70421130449	91.9752955342	0.0	0.397882418501	0.0	0.3930615374787472	0.0142532166706618	5.713030355562999	2.8462915970740004	120.4976453528	0.3921438082558248	0.2257226303388176
1157643	0.00034886332867699993	0.0		1112.93213825	0.0	0.0	0.0		0.00034886332867699993	5.48897839226901	83.256718394347	3289.7704818059	0.1641514806378397	0.201636282473418
1159347	0.0143106256489	0.15036668488	0.0965555147341	159.55984844399998	0.0	0.14102805497999998	0.0	0.09082977318758638	0.012909484196367015	0.2685424020744	0.34978399788059994	160.43495597451897	0.3577422242111722	0.3158700394951143
1159065	0.00262640987925	7.315648996739999	1.3398431436	18.9309210688	0.0	0.112016514559	0.0	0.03465610645169689	0.00262640987925	42.6341687234	3.8930275822455003	148.3358833295	0.4152612035486181	0.18906643916180074
1157695	0.0198780655695	0.00770409606957		7.56726662823	0.0	0.06514285714290001	0.0		0.0198780655695	0.23806973747957005	0.0	23.0451261602	0.10819500523388803	0.0
1157707	0.0141610092373	4.78817451248	40.7997275151	3466.68430895	0.0	0.0426635131447	0.0	0.05010566033236171	0.0141610092373	44.149468010703	82.2906516250677	3929.2219913559998	0.15986684640567322	0.13782491076748568
1157679	0.599767894863	0.14476489657	0.129748133593	0.14476489657	0.0	0.7532005689899999	0.0	0.2367434147910003	0.2042470779702361	0.9842928231520001	0.7643998479615999	16.730423116151098	0.2944302056633883	0.12531983792328172
1157653	0.094392709934	0.225983798911	0.278881336038	57.4440036959	0.0	0.117792015771	0.0	0.1401276077602848	0.05041547375593288	3.2674439043510004	7.048355517538	114.4697843515	0.14239965841159927	0.2178922415303362
1157813	0.12410007052000001	6.12461079939	1.12556816917	41.601255278400004	0.0	0.444368600683	0.0	0.08273308299679541	0.039143226425292235	7.148153229035655	1.4273676911696551	68.91667298155565	0.5134364820849315	0.22426461260472727
1159303	0.047651687911199996	4.63867820597	2.68539917508	426.244011979	0.0	0.17856076440699994	0.0	0.1425989920626163	0.047669892572185436	16.635966083049002	6.1756309728000005	553.317940222548	0.2796373594232044	0.16879303207460675
1159695	0.6286472917729999	0.00113096076529	0.00113096076529	0.00113096076529	0.0	1.0	0.0	1.0000000000737297	0.011479100183294576	6.4193087231252886	7.272653932455289	36.30231355376529	0.26124613345090275	0.32053148790260005
1158949	0.665674562356	0.007733062520859998	0.007060622301649998	0.007733062520859998	0.0	1.0	0.0	0.9380543759460088	0.05231504862378607	2.437631477920462	1.7930197889912518	31.287234072930463	0.22495887609497686	0.11700257711069502
1157443	0.0826013037245	0.0632528307906	0.012848450162	102.599591082	0.0	0.0968193265554	0.0	0.06468365713279565	0.07903178346807332	10.8416930759906	3.2610498469020004	340.025373888	0.0912462453258526	0.062435249646530924
1157967	0.0468256397934	22.7740331619	1.45928932713	84.2977317215	0.0	0.278281128656	0.0	0.08731658879993554	0.07981657178583143	24.992266842449002	2.098346763438	130.42348454663	0.2752016129032149	0.0937477386502228
1157793	0.006648122177789999	3.00101458916	2.89892591586	23.396417222600004	0.0	0.227947127057	0.0	0.18959956310995968	0.008280490116814206	8.033832588560001	4.594040870087	84.02495084550002	0.2438446245601907	0.17454037919339085
1159073	0.017193229695700002	71.9714689834	28.8318961367	267.37355800299997	0.0	0.28378550503100003	0.0	0.08149179668898837	0.010325473391996506	160.45416296743	79.49410808946999	397.6545356634999	0.4672487292997386	0.2869350595118588
1157609	0.0058442184383400006	0.0	0.0443917036755	745.8243350260001	0.0	0.0	0.0	0.016114357815066437	0.0058442184383400006	90.05856923501999	190.38291370564903	2425.803866353	0.09580478422903088	0.14507950011441725
1159313	0.335955077499	0.0	0.0	0.0	0.0	1.0	0.0	1.0000000000022622	0.20455174949820407	0.27695843906279	0.21875708401779	2.81173834560079	0.846257889990768	0.8039752954857757
1159205	0.0	0.0		3.01546271433	0.0	0.00986224170319	0.0		0.0	11.276399281222998	11.940109098599999	241.50952889923	0.10559238166386414	0.04575548056297851
1157677	0.0	0.0	0.0	0.0	0.0	0.972413793103	0.0	0.9999999999970428	0.0014387208416652645	0.03425459191201	0.5336806228147001	561.077406955	0.3523301516002879	0.3788358875025789
1158901	0.0102789050674	1.25398704223		64.3458818933	0.0	0.0643330179754	0.0		0.010860333509686288	6.4071431945700015	0.0	115.679894471	0.14674503050954615	0.0
1158007	0.0074674654975	0.00155500788242		50.7183682051	0.0	0.000971581248482	0.0		0.0074674654975	3.12994428746252	6.835717818154699	108.401283764586	0.10377784467197766	0.14805145106915985
1157785	0.021007238522	0.023252396255	0.101908170043	12.678859425599999	0.0	0.108354615104	0.0	0.08473677354559317	0.023257860037328708	44.965944477678	12.284762045699999	122.6925512615	0.3922572178479104	0.2634969827421346
1157747	0.9183659487710001	0.00155970931519	0.0	0.00155970931519	0.0	1.0	0.0	0.44206738278252816	0.13869396256864025	0.21550239683699002	0.0856434265443	0.22500760623379	0.839514497639797	0.4132732870572265
1157639	0.0466099862517	0.218333888481		13.5300402018	0.0	0.139062796433	0.0		0.044903866139145175	0.4136482092602	0.0	21.493458256026397	0.13252260679729352	0.0
1158887	0.31892642714200004	1.02320586419	0.301462956544	27.3150811377	0.0	0.569191081629	0.0	0.33861926245690305	0.09674508924165057	13.480370733412002	4.053921653011002	158.451598204378	0.3484558881601288	0.19043403794072414
1157595	0.00325439339975	0.007615757407619998		6.00716473199	0.0	0.00232858990944	0.0		0.00325439339975	14.53594172482992	8.8970779979573	207.89576402333432	0.1273071718536705	0.12614239811156105
1158913	0.028000303399799996	0.0120897839952	0.00965483815526	37.2585911411	0.0	0.04692837878330002	0.0	0.029640726876351574	0.02571245732768127	2.484906789277701	1.8350831443788616	73.3992696737796	0.15325358954070806	0.09107067033113417
1159057	0.00104964038005	0.290223934102	0.0530788123287	2.28358166283	0.0	0.123356744102	0.0	0.06610165402476018	0.00104964038005	152.250062550802	78.17085999902869	380.58327939182993	0.2480033745779893	0.1146762718267318
1159007	0.00273409639241	0.575135638937	0.0763160751667	12.8119401704	0.0	0.120724801812	0.0	0.01650833729815934	0.00273409639241	6.435256659815999	0.8497885328186999	73.96748623811999	0.3968608434888869	0.28108143765434274
1157383	0.0141677968698	1.23639919097	1.15224799415	63.7772469096	0.0	0.144986449864	0.0	0.13232790583454007	0.012562055379002984	14.93696350397	1.462551969469	79.6251243136	0.24591057797117435	0.1314271026254178
1157959	0.137440565387	13.700564313	0.310303975319	15.847877404	0.0	0.382374496152	0.0	0.13020908729318575	0.06657648751996961	36.652010732787	1.8179374635776	100.36457879756	0.31263713178609776	0.10592988950241684
1158975	0.912772446592	0.0	0.0	0.0	0.0	1.0	0.0	1.0000000000060147	0.2763335869043333	0.0063540001865500005	0.0063540001865500005	0.0063540001865500005	0.9820128479657388	0.970752186422769
1157363	0.0	0.0		0.651352958899	0.0	0.0	0.0		0.0	0.220600761226	0.0	43.030806791398994	0.09707927677329067	0.0
1157725	0.13011234475800001	2.65400958501		27.6959545586	0.0	0.227274641068	0.0		0.1304438654396746	2.69400513261234	0.00679121968278	28.94335896394079	0.2663665644769433	0.032730185507656134
1157963	0.33713634822300004	0.278021016857		0.308014335576	0.0	0.865724381625	0.0		0.028845219501978808	23.052054178757	1.45928932713	84.60574605707599	0.2888465204952264	0.08574616651646673
1159359	0.00995767267531	44.912264799	45.9156405715	326.423346605	0.0	0.143717479283	0.0	0.13321318325368872	0.009305881794531262	73.9569911847	74.96342952399999	387.81643337160006	0.2772007491912899	0.2792301550899716
1158981	0.931312441069	0.0	0.0	0.0	0.0	1.0	0.0	0.999999999994854	0.2865698469984294	0.27695843906279	0.21875708401779	2.81173834560079	0.8484444444442326	0.8067632023943949
1158009	0.0839678627617	1.06589930909		12.469242583800002	0.0	0.315159574468	0.0		0.10902125501649973	3.7435395983505	0.0	44.28925839125	0.2450628997120413	0.0
1157565	0.00363181444531	0.00982861292869	0.00805824165582	362.99890928699995	0.0	0.028945074106400005	0.0	0.023925138966724067	0.00363181444531	289.0684239653287	425.9357301316558	4413.640629777	0.1142998166692791	0.14459231883660376
1157651	0.0689002643577	0.08692917414010001	0.0662436366547	0.657134903886	0.0	0.152838427948	0.0	0.11485375507446735	0.026385752186336167	3.1283892795801003	6.835717818154699	57.682915559486005	0.14992912441404851	0.21451397686260998
1158919	0.0555093120554	1.24070473813	0.362782095384	22.2190163492	0.0	0.212931522354	0.0	0.12840463726730456	0.036963290471112784	3.2678377922550004	1.332593044703	41.30771451265	0.5362760834671035	0.4437259094739771
1157457	0.19337721756499998	0.7905568870190001	0.208206276409	5.181159245930001	0.0	0.792274052478	0.0	0.33964418126698354	0.058776945351093485	2.218233680549	0.639057436308	46.12575282513001	0.27285291214250224	0.09865268077690784
1159137	0.00622470382457	0.016122102737399998	1.64226587547	491.647856879	0.0	0.00413597001422	0.0	0.06819630823360416	0.00622470382457	4.659573747777401	6.13136744609	778.6448493299997	0.06989683551651549	0.09773983984449287
1157683	0.131382524963	0.8383287464679999	0.629801757808	32.503741198200004	0.0	0.253799790356	0.0	0.1956420328963084	0.08539010332393197	1.82262156962	1.3942016057695998	49.23416431435111	0.2813068686780741	0.14803340989137767
1157715	0.0183331606522	4.94460629752	15.2908955768	1169.15900987	0.0	0.0528383421725	0.0	0.06680682729955734	0.02032748141381856	44.27330086702	56.750712212299995	1612.78196413	0.18067948415772347	0.15308549368703164
1159185	0.0	0.0269149895757	0.0269149895757	0.0269149895757	0.0	1.0	0.0	0.9999999999898606	0.001155666274948572	71.0807905660222	32.533686411312196	676.0588065525321	0.30745414183872594	0.27543189598020923
1159251	0.038690908268699996	15.2326717748	29.5492070069	80.5432835463	0.0	0.244674449392	0.0	0.2644813940716905	0.026812950087468986	32.8728080029264	55.20119605020639	204.6479619457564	0.29967900865916114	0.2998192626607046
1157353	0.0221226475227	7.38799431849		185.699640682	0.0	0.194196193881	0.0		0.02092845156684492	9.7953479497127	0.57342528533	198.53986040552692	0.2849016195959363	0.03946141403106268
1159701	0.63141799651	0.0008064218563960001	0.0008064218563960001	0.0008064218563960001	0.0	1.0	0.0	1.0000000000232832	0.038904837679759184	17.640136228126394	25.651989043306397	124.10467839945642	0.3244062111128127	0.3157053390609707
1159213	0.0	0.258773498237	0.258773498237	2.0929991677400004	0.0	0.148148148148	0.0	0.19576708211438976	0.0054829902601837574	10.030429100301	12.217834254326998	50.583636250430004	0.2939089651853113	0.3237059162354935
1159009	0.0338255187981	5.15315615234		51.3340125777	0.0	0.221255969777	0.0		0.022644998131750332	16.708354069186	0.0	197.786849229496	0.2092176315457981	0.0
1159001	0.00621339995411	1.9995003473	1.08392742803	35.421927345300006	0.0	0.15030936633199998	0.0	0.08047722224044558	0.00621339995411	6.475701440859997	3.170053924325	46.10025499635	0.4036853515018681	0.2802907381810598
1159127	0.0	0.7329990691509999		2.48023987585	0.0	0.252307692308	0.0		0.0013638187588038981	19.961914782731	0.0	183.1978762711	0.19080628921064416	0.0
1157631	0.011491463602200002	1.65396513934	0.042207824903	654.6401297169999	0.0	0.10349373764	0.0	0.020356297962843863	0.009468762428736404	15.32569255724	8.300623991243	809.455728587	0.13523148148127148	0.09691986987299328
1157369	0.0888229718344	0.290273605759	0.131165410276	0.441935125535	0.0	0.573008849558	0.0	0.2900074080628871	0.06406084266726797	15.685041663868999	0.7652327204860001	22.329305873215	0.43730055548964775	0.13785714167038693
1158051	0.0127682311259	2.90420768272		95.18503221540001	0.0	0.121583768643	0.0		0.012593059663050415	7.759616222559003	0.454928745167	125.91417503961502	0.2189137313900255	0.02364102698692411
1159311	0.306350806236	0.0	0.0	0.0	0.0	0.509230769231	0.0	0.3923146901734945	0.2834701171418196	0.27695843906279	0.21875708401779	2.81173834560079	0.793010752688006	0.7385109510726061
1158877	0.0203351152617	0.0870380410342		10.4437494611	0.0	0.380126182965	0.0		0.00708312861563304	5.4192674558742	0.0	83.1705212423	0.2661432245836025	0.0
1157733	0.00794001683974	0.970938059094	0.488972414285	31.6703415267	0.0	0.0614741406008	0.0	0.03778924300671462	0.00794001683974	1.4031719953634	0.8107262759880001	94.8379733547	0.10712595319476494	0.07801600379635945
1157803	0.00928641964311	0.289022690806	0.177369757221	130.690071724	0.0	0.0598557358857	0.0	0.03886635665969849	0.009575813074703218	0.3897686310523	0.2746289983336	136.469818150039	0.11404939864180673	0.09843160324248468
1158061	0.00569585098719	0.143592284876		4.7373646847	0.0	0.219146482122	0.0		0.0027023667018471545	12.305428529906001	0.430851159899	86.5155208701	0.23566855544950355	0.05639530119368059
1157461	0.0	0.14540498697899998	0.503900836222	10.9836730266	0.0	0.510638297872	0.0	0.4966506905654261	0.025898622938442	1.6604238216490002	1.846843627102	84.60745131430001	0.15331675438132467	0.13955168635085294
1157389	0.00648970904777	0.00219261122402		13.94037092	0.0	0.000984251968504	0.0		0.00648970904777	5.79238644364402	0.0	70.3788319533	0.14276735206948146	0.0
1157593	0.026307782412400005	0.011442171206		2.06173347437	0.0	0.0478260869565	0.0		0.011612517811823856	1.0841297915093089	0.0	14.541372872336602	0.2162768343479191	0.0
1159093	0.0075269840875299985	13.1790859312	11.125313313900001	400.31826009599996	0.0	0.102851658898	0.0	0.07685551030837509	0.0075269840875299985	72.967839792771	24.215451529410004	545.7146324406	0.2473921490957479	0.16519478178815286
1157953	0.007762638850069998	0.220600761226		42.3794538325	0.0	0.110181531176	0.0		0.006839543409623567	5.540225739575	0.0	126.4688698402	0.1534078060693288	0.0
1157979	0.010641766512200002	0.738435134228	0.828082117303	32.806295588000005	0.0	0.114633808667	0.0	0.10202949082053132	0.010641766512200002	0.970602589327	1.028226420898	37.54278314228	0.1881244002936974	0.16092998231817676
5275848	0.0029381352069499994	0.0		49.419649696099995	0.0	0.0	0.0		0.01247316872264568	0.217437478015	0.220114546828	389.88156005339994	0.23595187544216176	0.2648382928776707
1159727	0.0	0.00486038113013		0.00486038113013	0.0	1.0	0.0		0.0064367144383592105	52.010645258188134	0.0457785840845	231.2374362919501	0.7922716230720481	0.18753752320897954
5276488	0.0011198773971099999	0.0		128.089397194	0.0	0.00125944584383	0.0		0.00921058699536543	0.217437478015	0.220114546828	340.4619103573	0.3024310595063267	0.3394561936104397
5276596	0.5027516415609999	0.0	0.0	0.000125756065245	0.0	0.845652173913	0.0	0.7236255621247352	0.5027516415609999	9.22397383859975	18.15509017815609	332.4347729916188	0.4095840867991449	0.4669013961859133
1160573	0.041861611395800004	0.01259701667	0.006387068970069999	38.2143446451	0.0	0.0481375358166	0.0	0.01662130406486675	0.0418616113958	0.28702679193529995	0.093187078935388	41.612511541079	0.2657111356116291	0.19225739753288093
5275488	0.041616539242	0.029532188928	0.716612347227	88.6244270974	0.0	0.05660377358490001	0.0	0.10693166245895036	0.041616539242	18.586212088778005	23.106759842067	751.2159253753999	0.19039957093058066	0.24902638314539505
5275506	0.0257510190529	0.00147168185504		0.017579832419900004	0.0	0.0695652173913	0.0		0.010350514853673012	1.107506873883354	1.106058799294288	8.04753725587679	0.2320049428482155	0.22967893907263176
1157579	0.0207080440299	0.06942137060100001	0.0599854358225	15.4434775225	0.0	0.190830721003	0.0	0.16646664064824732	0.04567554398063458	0.401945797115	0.27136756679850005	17.06007112601	0.3663534124168488	0.23027821869546186
5275792	0.011266841173000001	0.007306723091459999	3.08636956372	70.9542641412	0.0	0.06337166625889999	0.0	0.07766102222292927	0.011266841173000001	0.0073822013218883984	3.0864450419504283	81.84433645053042	0.3397450753187393	0.3215184471210483
1159179	0.036614362925	0.162044441182		0.392017825914	0.0	0.5455037919829999	0.0		0.01495677684175936	1.563164976134	0.0	11.708148530214	0.4550539122412314	0.0
5275822	0.00115473823436	0.00355559119998	0.010279530994	170.753187862	0.0	0.0894596988485	0.0	0.2634179924365975	0.00115473823436	15.38342068782586	20.75857581852797	917.8151000647156	0.3798005789641305	0.5198456349559654
1157997	0.05990599837190001	5.4560491301199985	0.523268810241	133.620806631	0.0	0.0986082506397	0.0	0.020655292723227886	0.05990599837190001	7.051820372979997	1.832522407841	223.7013156886	0.11986188753708404	0.058844996176793486
5275834	0.047695423596299996	3.90061036896	0.5977178429600001	34.1124698425	0.0	0.108108108108	0.0	0.08586535511148738	0.047695423596299996	15.653238943760002	17.170947345560002	667.3112143355	0.1925758432261407	0.21480892948343414
1159141	0.00491927462553	0.5200654676300001		11.9256029175	0.0	0.0898645172355	0.0		0.00491927462553	21.035217808300004	0.0	204.8196817729	0.2526915504168259	0.0
1159401	0.0029154585338300003	0.0645601411816		4.54626432915	0.0	0.0504266873545	0.0		0.0029154585338300003	0.9886543868776	0.0	15.91407585335	0.2864099423414602	0.0
1159025	0.0002769169310620001	0.158857737773		13.412903578800002	0.0	0.07098258297730001	0.0		0.0002769169310620001	10.356658379272998	0.0	205.7270431658	0.11760513186011375	0.0
5275790	0.00839553385412	0.0546984763787	0.0250932592407	100.83629546799999	0.0	0.034768480909800004	0.0	0.05756358399583553	0.00839553385412	0.0547739546091284	0.0251687374711284	111.7263677773304	0.269863525892729	0.2628161768857639
1158499	0.525181347845	0.0017682274337899996		0.0017682274337899996	0.0	1.0	0.0		0.007651645338277631	14.28500789852148	0.0	58.51264462789029	0.7120649651976676	0.0
1159041	0.00418247885325	0.00470940757077		17.0648792398	0.0	0.004641909814319999	0.0		0.00418247885325	1.29136497804077	0.0	77.61407576399999	0.09024067706970358	0.0
1159367	0.00831335163433	12.0002260342		41.703836555	0.0	0.173806839534	0.0		0.006126931453916539	12.995769159431006	0.0	44.273372034447	0.2590101422026417	0.0
1157427	0.004946159422109999	0.0		10.849930911300001	0.0	0.0	0.0		0.004946159422109999	0.38507337519	0.322026884824	84.18150491703	0.039902845246394106	0.028116494250448324
1157453	0.18161039308200005	0.145012723777	0.127486257639	1.97276258693	0.0	0.411596958175	0.0	0.36603788796798703	0.05978001932240552	1.7374890319600005	2.5992051445860005	62.449713282595006	0.2693524735660099	0.27729180139534715
5275618	0.209157428741	0.0	0.228125773836	0.228125773836	0.0	0.333333333333	0.0	0.9766256423600008	0.03503016706016388	1.6361129931606913	22.57824331905739	208.417506034566	0.21199814342055234	0.2576126033692756
1159143	0.00624173576491	0.0113566515211		3.1526915148400003	0.0	0.00895188362551	0.0		0.00624173576491	2.3592990319011	0.0	44.71116684614	0.12096852300211686	0.0
1157999	0.0043620066231	0.466754848836		49.0044954582	0.0	0.0786675117966	0.0		0.005652096321621281	12.659003231901044	0.0	292.19639724505004	0.1310797212180918	0.0
1159157	0.00390902315828	4.61875288367		346.22761308800006	0.0	0.132702591526	0.0		0.00390902315828	7.293083353518	0.0	376.77808851844003	0.16695336690330834	0.0
1159373	0.0062703351945999995	2.34794238038		41.5584753313	0.0	0.160256410256	0.0		0.006262909037602528	69.84713174968	0.0	171.80701845579998	0.4380395542300514	0.0
1157483	0.00764255132644	0.0		40.7453363221	0.0	0.0	0.0		0.00764255132644	0.334179535275	0.0	151.6127984401	0.044180717936708296	0.0
1157495	0.08191451468189999	6.36920198612		6.39724719455	0.0	0.5	0.0		0.025291443878728986	9.69364912762444	0.0	105.00763547134001	0.3176993689045161	0.0
5279292	1.0	0.0303181801501		0.0303181801501	0.0	1.0	0.0		0.2297520342693438	0.7986553396550999	0.0	99.11074388605013	0.34542167393386514	0.0
1158591	0.0121650790616	10.2958640654		796.390729955	0.0	0.134976607779	0.0		0.01179994645695171	11.007006237941999	0.0	806.5969641195039	0.2410630731799938	0.0
1157559	0.023489740000100002	0.612484897661		83.7469613208	0.0	0.059307692307699986	0.0		0.024833766276509475	0.7442034672050001	0.0	100.5109144511	0.08003978779839999	0.0
1159395	0.0266603136809	24.4910815644		48.4933512545	0.0	0.164561860203	0.0		0.02380046303841608	40.769288757264	0.0	164.55033852050997	0.2406994047616368	0.0
1157561	0.0063635606151899995	0.06406353157940001		1.15415124519	0.0	0.0972198820556	0.0		0.006028063566553368	0.1957821011234	0.0	17.91810437549	0.0961247023165027	0.0
5276446	0.0657495901596	0.0033079339191300003	0.00571370404214	3.53255392751	0.0	0.07446808510639999	0.0	0.10017385035402518	0.03494649225877953	1.6394209270798212	22.583957023099533	211.95005996207598	0.19970414201165834	0.2435389363097974
5275896	0.539261874947	0.0	0.0	16.0599408253	0.0	0.578354554358	0.0	0.5796362327693539	0.34422873441211105	10.18466602864075	19.35346410345609	334.7501423316074	0.3726196603189783	0.4186778635689651
1159199	0.0	4.72685313388	5.1679418128900005	39.2925581844	0.0	0.1282249742	0.0	0.15879669870752988	0.0008023997473065334	19.784360064679998	20.65718878299	282.6745159214001	0.3390679806243019	0.3397871822595305
1157555	0.0065175562537799995	0.046930489217600006		27.6384620383	0.0	0.06287872826	0.0		0.0059971359926331074	0.0918814272299	0.0	39.570541408400004	0.09933195116328143	0.0
1159317	0.0006541872160549999	2.09836274825		61.827980545600006	0.0	0.0452701089983	0.0		0.0006541872160549999	7.300217929076	0.0	136.839776011868	0.15339357007786086	0.0
1158971	0.0027756889821399996	0.40896925173		23.4346354171	0.0	0.0638559778427	0.0		0.0027756889821399996	1.067618564382	0.0	51.152434899778996	0.2048254620123406	0.0
1157973	0.0152961207324	8.03909774644	0.327266608103	32.5713043704	0.0	0.2461402734890001	0.0	0.09978609316317393	0.01098724848476839	9.3778167184942	1.2635050326059	66.68420347268199	0.2098037490098316	0.13457452341296278
5275500	0.0	0.000126536775497	0.00366956648941	0.0330260984047	0.0	0.00381679389313	0.0	0.10574714694725597	0.004368545162718232	1.1052597323983708	1.120198645887278	8.46335609972159	0.20532528136142075	0.2399006432473889
1159101	0.026433637172500003	0.33279625974		5.64082023637	0.0	0.187361642182	0.0		0.01777205672772955	4.023335821297	0.0	34.956172140309995	0.2647212543555584	0.0
5275844	0.00939054814007	0.0084256563714	0.0108150216111	40.2780180807	0.0	0.06201881950380001	0.0	0.03762674599084952	0.00939054814007	0.017507360797019998	0.02248815934586	61.65686985469355	0.3955293387144512	0.3897222984118569
1157439	0.0	0.000254840502748		9.12167467416	0.0	0.0017316017315999995	0.0		0.0	0.133180848788948	0.0	35.12690278402	0.0837724736515567	0.0
1159147	0.00242339908525	0.0		25.539255807300002	0.0	0.0	0.0		0.0024233990852500003	24.4910815644	0.0	74.03260706180001	0.14514427551941306	0.0
1158107	0.0301045068298	0.0		0.259952649125	0.0	0.0	0.0		0.0301045068298	1.02332875409	0.208206276409	49.794812982555	0.3091719446398566	0.10931077098247746
1158481	0.00868989476396	0.121448188735		0.7723546801189999	0.0	0.44606741573	0.0		0.010426097543904536	26.287474186515002	0.0	81.075590983339	0.5692987778450593	0.0
1159061	0.0220837191824	33.9061535691		118.662226018	0.0	0.173048684062	0.0		0.018714738184525247	66.95150469746801	2.46317706141	209.5718856593	0.3779058409845655	0.08964464942138356
1157331	0.008535611055180001	0.270905589015	0.047097481277900005	2.43000876817	0.0	0.3630136986300001	0.0	0.20114892526043374	0.01041127739192838	5.503222091235	2.7678698746679	111.69916637107	0.36504353434379055	0.2997739285981113
5276588	0.04806909913099999	0.0		8.3950263817	0.0	0.0	0.0		0.04806909913099999	0.217437478015	0.220114546828	398.2765864351	0.22283117230301736	0.2501112871515497
1159077	0.0063571477638399996	0.0702119999332		24.1748823576	0.0	0.0285882122577	0.0		0.0063571477638399996	3.9580993702132004	0.0	37.94786627589	0.2442084254044339	0.0
1157755	0.0066439510592	0.5472846798659999		36.2147752054	0.0	0.0369808196495	0.0		0.0066439510592	2.490549970706	0.0	84.70515453189999	0.08582976699943977	0.0
1158109	0.11679672379	0.0164104783908	0.0175826554187	18.0269710802	0.0	0.11914893617	0.0	0.12768089559126353	0.11679672379	3.29396469986662	3.2257353096345205	198.4169326003117	0.13660916535947393	0.11278256483305275
1158615	0.0845346146548	0.00014437461504700002		0.0459842232813	0.0	0.0321199143469	0.0	0.0001765001597873694	0.007765890161974184	9.784108082355047	11.068824771500001	316.06233201528136	0.09911141490126853	0.10172503295517712
1157957	0.22378579235800009	0.236323750389	0.401340559023	1.3834471732700002	0.0	0.382222222222	0.0	0.2393626707481805	0.0471236542835973	23.187770170176	1.9089740472816	85.90014856683003	0.29377928008018644	0.10519298868875204
1158079	0.06974497360689999	2.55746266525		142.20660054799998	0.0	0.114101022249	0.0		0.025220838160016096	12.251111792874445	0.0	247.21423601933998	0.2182912507341922	0.0
1159113	0.047016761488800005	3.09687860266		27.828516791	0.0	0.238541366388	0.0		0.03489569669528322	3.690539561557	0.0	29.31535190394	0.3237597911226313	0.0
5275770	0.00556490892601	0.0021417022144300003	0.0833691377848	59.040790785	0.0	0.0337181044957	0.0	0.04852383401220657	0.005564908926009999	12.998678301814433	17.763183197474802	758.1898549685001	0.18451660245843068	0.20155709904053154
1157333	0.0007813938008220001	0.00016632664483	0.00365918618627	9.09159973555	0.0	0.000246244767299	0.0	0.004789756730529723	0.0007813938008220001	1.7784462509866898	1.7684477259511902	17.60706504939525	0.0758400217657745	0.07570722273986905
1158505	0.028067448310700002	0.0017682274337899996		0.0232812401373	0.0	0.218680709534	0.0		0.02684780244331924	14.286776125955267	0.0	58.53592586802758	0.4031754294637595	0.0
1158523	0.00103732462495	0.0		0.0	0.0	0.0	0.0		0.00103732462495	0.022472152719310003	0.01872679393276	3.4669999680699997	0.07661016949147371	0.0569734982207889
1159109	0.0009664044969380001	0.0563186118961		9.12323240993	0.0	0.0544755709956	0.0		0.0009664044969380001	12.056544646096098	0.0	50.82706896493001	0.13829436220054905	0.0
1157373	0.012831559997700002	0.0204136632383	0.00191378092859	42.4706205332	0.0	0.0150623676159	0.0	0.0013834095818273562	0.012831559997700002	1.5795683794428002	1.4096402977277902	92.36297934379999	0.04527136454370615	0.04301818402156754
1159151	0.0203913649693	4.482773914		49.9046574355	0.0	0.119801277502	0.0		0.0203913649693	10.909115748502698	0.0	333.4355488519729	0.42931876307834427	0.0
1159161	0.0015709356090899999	0.117746021264		10.552662551100001	0.0	0.0913745569122	0.0		0.0015709356090899999	2.635401509093	0.0	34.792730896040005	0.16920977546221805	0.0
1158035	0.0170194226896	1.64612515642		18.3449751197	0.0	0.156884875847	0.0		0.010387336679914335	5.778700293776603	0.628069625323	94.7571509909	0.213651910970422	0.07449767720577168
1159099	0.0157019492292	1.28665557047		60.5491965242	0.0	0.106488765813	0.0		0.013864196113417656	4.977195132027	0.0	89.86454842814001	0.2043512849780935	0.0
1157415	0.0077335631503000005	0.718843566618		5.4984398048	0.0	0.0199040767386	0.0		0.0077335631503000005	3.087034730542	1.560096013155	13.92449096347	0.12366766876193593	0.09765474263923546
1160585	0.005076661073	0.091290258395		17.0516631025	0.0	0.0233626198083	0.0		0.005076661073	1.9001301192436	0.293887408123161	89.65445238870598	0.11824905400733388	0.08835488427226018
1159339	0.00774675996406	0.768744340749		42.272196544	0.0	0.0696249080657	0.0		0.007746759964060002	34.674897909849	0.0	160.934422562	0.14874557133400462	0.0
1160591	0.00912666269102	0.33774107667	0.00385408680449	40.7921971766	0.0	0.0949381852111	0.0	0.05188988456750188	0.00912666269102	0.5193782860446999	0.19374753296889	46.066776764926004	0.2332010751312017	0.1980674530861709
1159033	0.00748031087047	0.0984088682162		73.6101611481	0.0	0.030701754386	0.0		0.00748031087047	5.3727293139962	0.0	197.50983887709998	0.12621987882169985	0.0
1157541	0.00839300816007	0.241166675318		23.7956184105	0.0	0.0255885363357	0.0		0.00839300816007	0.28979251567233	0.0	35.7547079000037	0.08252564223200934	0.0
1157937	0.0145978751419	2.71836589381		35.2106006167	0.0	0.0905500433484	0.0		0.0145978751419	2.929172488171	0.121409962769	41.35592292843	0.15179715422478415	0.054696530478434965
5279860	0.0252386711142	0.0		45.9269098386	0.0	0.0	0.0		0.0252386711142	2.52439198166	0.0	109.6140631455	0.07084884942235467	0.0
1157463	0.0509741185547	0.00234435405582	0.00234435405582	0.00468870811164	0.0	0.454545454545	0.0	0.4899858130227669	0.1138534365640313	3.27755422147582	3.2081526542158203	180.38996152011163	0.13735465116244022	0.11214646241150852
1158069	0.0098264279619	0.0153445514152		2.7746193221599995	0.0	0.210407239819	0.0		0.003971032196019629	0.6717024757233	0.0	11.928888654859998	0.2523670793883661	0.0
1158067	0.116310268358	0.0		5.64149560343	0.0	0.0	0.0		0.03836392674229697	0.38507337519	0.322026884824	39.94882170733	0.04854368932043386	0.03420503859425583
1160711	0.11203966683	0.0389567091188	1.75423094971	74.791135285	0.0	0.0921405750799	0.0	0.16662169648181713	0.11203966683	1.8049490732358997	3.3457854150068003	195.7701450139884	0.2591855117809543	0.26804892824467075
1157699	0.35519858934799997	0.821105660201		22.3716109995	0.0	0.396911898274	0.0		0.2729432379495159	1.850359701701	0.7537797183030001	26.160152596350002	0.4337586886602948	0.20135008325459766
5275554	0.005849012662600001	0.00291840682621	0.00320208301855	58.9650344204	0.0	0.0024727992087	0.0	0.002953420830379645	0.005849012662600001	5.5220466912613	14.596209233859556	218.3663027330232	0.07937404210704455	0.10986820970892093
1159117	0.0021473544698900004	0.184787121194		13.1720654478	0.0	0.037389237086699986	0.0		0.0021473544698900004	0.7784480800910001	0.0	14.65890056074	0.25525161049380274	0.0
1157417	0.0118268895596	1.25048101756	1.2504504317799998	61.8563210519	0.0	0.0651340996169	0.0	0.04559413442379017	0.0118268895596	1.614003246403	1.5868761010089998	67.42030641926999	0.1676882661997237	0.14657468449894442
1160581	0.0115961757139	0.0	0.0	0.0	0.0	0.0195258019526	0.0	0.0057621414457946244	0.011596175713900002	1.105960353918	1.973470751778	54.02034254270001	0.053573679566366286	0.06220046343657387
1158003	0.022332612135400002	0.00027174266506299995		7.5697599281	0.0	0.00985545335085	0.0		0.022332612135400002	1.0729593629683718	0.0	20.049399326066602	0.2464028776977948	0.0
1160587	0.012113833476499998	0.0460352585069	0.0007802586187610003	3.7823601751	0.0	0.195364238411	0.0	0.003522868304139854	0.00547689197052486	1.8088398608486	0.293887408123161	72.60278928620599	0.19003021147995647	0.15519495382444734
5280882	0.00338926130725	0.000275748985587		0.038053360011	0.0	0.046204620462	0.0		0.002414612249906125	0.11025914532752701	0.0	16.771957571447	0.1347062157566583	0.0
1159403	0.000637495376135	0.733822702226		22.820898291	0.0	0.08834385045839999	0.0		0.0006374953761349997	8.565668126456	0.0	109.32860513719999	0.4159578967153756	0.0
1159201	0.005464451391020001	3.73868771864	13.4902942772	196.14861106200001	0.0	0.0419501133787	0.0	0.09065592022047768	0.005464451391020001	21.628846757740003	44.053296375200006	898.620776705	0.5004038772212244	0.5228860050822854
1157387	0.00572430354197	1.49281295194	1.32776612949	37.2975811104	0.0	0.0585199440168	0.0	0.051994767953311136	0.008379200009974564	7.146641610039997	5.727798002719999	221.9404019969	0.1231415276359289	0.09603716548247963
1158473	0.00367714549544	0.200853625895		28.4977756875	0.0	0.0744577533182	0.0		0.00367714549544	1.478340518224	0.0	62.23547437559999	0.16657292085141825	0.0
1160603	0.128573976412	0.0	0.0	0.0	0.0	0.337099811676	0.0	0.2129794014190257	0.0489614183712976	1.7659923641170998	1.5915544652968003	120.9790097289884	0.3573756245923243	0.32393608013962305
5279316	0.456458229023	0.261149382102		0.261149382102	0.0	1.0	0.0		0.037360632066366736	14.064542757876	0.0	181.41456629673598	0.2370467381521525	0.0
1159389	0.00131094729819	0.0146840723792		1.08607804444	0.0	0.031218529708	0.0		0.00131094729819	0.16919453823720002	0.0	6.80315318487	0.22387443205294671	0.0
5275564	0.012477918916499998	0.00545005488675	0.0167589187768	44.0461793259	0.0	0.0136379133992	0.0	0.04254774416049824	0.012477918916499998	0.886236464379718	0.902949310471293	68.70394014660528	0.1085226169676481	0.12558254311986586
1158515	0.0117859041279	0.0205514559057	0.0165179925971	2.07574562076	0.0	0.146794150731	0.0	0.09486778580225172	0.008600018732967256	0.022319683339490002	0.0165179925971	2.0990268608973	0.2168624161070602	0.017688226002139634
1157947	0.018169899699099996	0.364114613898	0.303692926711	45.2986302713	0.0	0.257620452311	0.0	0.2024948378000228	0.009832061155537569	2.246771690143	2.0550017124789	139.70393457366998	0.329171775721888	0.27853712473235165
1157335	0.013486822207	0.008316332241520001	0.0128071516519	1.00140654974	0.0	0.0156103652825	0.0	0.02561297159478058	0.006383746111530719	1.77827992434186	1.76478853976492	8.51546531384525	0.10468940889018097	0.10277195626716226
1159405	0.0037592668992999997	0.079955251771		3.5798918485800004	0.0	0.0505335844319	0.0		0.0037592668992999997	1.29438978713	0.0	6.71794706725	0.6834422077054864	0.08748567094766185
1157575	0.035908493436	2.76467004401	0.63357089879	165.672225341	0.0	0.102502662407	0.0	0.043016240002317886	0.030542006823806624	3.28691169162	0.9728771124722	225.50748504311	0.16929148798910498	0.0931953617839858
1157955	0.0203228531058	0.818842289998	0.36083731128	52.404036547	0.0	0.0635507332777	0.0	0.06253122939601619	0.0203228531058	24.075666402133198	3.2281843786008	141.16856382091999	0.22418643552281647	0.10438153655077104
1158503	0.270688986259	14.2734196604		58.4976571553	0.0	0.5988350928289999	0.0		0.03439125928329888	15.520127887898116	0.0	69.21124993581851	0.5796977473628556	0.0
5279384	0.00889325520366	0.00432676810669		1.81588484097	0.0	0.235294117647	0.0		0.009345307408519578	1.04248983647669	0.0	24.159425537470003	0.25281928390206715	0.0
1158091	0.0333171213083	1.33055924083	1.308486522	31.016942672800003	0.0	0.08560311284050001	0.0	0.07331104880820889	0.035119767051117946	2.308397934133	2.0204380446513	34.248731164283	0.3446364525595379	0.25615174618442715
1157553	0.00651056561245	0.00367490234203		0.0270101194037	0.0	0.182330827068	0.0		0.008311296391521221	0.04862584035433	0.0	11.959089489503699	0.15257082896111013	0.0
1159027	0.0018498570121600001	0.792901013221		32.967816408000004	0.0	0.0315985130112	0.0		0.0018498570121600001	10.990701654721	0.0	225.281955995	0.10835906284036996	0.0
5276598	0.0383725580175	0.0	0.19828408584	86.0271412312	0.0	0.0	0.0	0.005841559732900747	0.0383725580175	10.183336300820633	20.28853333675132	420.11071932008736	0.2607627666451129	0.31542644206036674
1159361	0.103445727749	0.593660958897		1.48683511294	0.0	0.42094017094	0.0		0.0596862680195217	1.1885707612675	0.0	3.6056699089839	0.6051178346423889	0.0
1157399	0.00995842195626	4.618893458780001	3.48600957765	245.57701399799998	0.0	0.110982525171	0.0	0.08012733325837612	0.00995842195626	5.880922790976	6.386036558020001	338.76127478713994	0.17495296963191126	0.1356847919863598
1157323	0.00610911939347	0.045873668947	0.0392784368014	22.5116769535	0.0	0.0363050483351	0.0	0.028607727496786733	0.00610911939347	0.41039493925927	0.34392279405444504	68.9343375305553	0.11295681063131055	0.09230238886926734
1157935	0.0076540982688	0.07007502988560001		46.123845341000006	0.0	0.0511885895404	0.0		0.0076540982688	7.9018941825390625	0.628069625323	149.5429709205176	0.17600566677874074	0.05602809686731657
1157991	0.0532361883648	0.0427780236641		3.13500028023	0.0	0.22107674685	0.0		0.008521617851217203	1.0481376766111	0.0	10.16656014909	0.3300408719347929	0.0
1158085	0.0870111465733	0.0		22.049086102600004	0.0	0.012135922330100002	0.0		0.024825040991348656	1.850359701701	0.7537797183030001	48.20923869895	0.4164759725397057	0.19309655282967536
1157377	0.011547446374800001	0.0215510150083	0.0146532339058	4.12307565864	0.0	0.0576307363927	0.0	0.043926240782667526	0.01259954795283743	1.5591547162045	1.4077265167992	49.8923588106	0.05949149725807476	0.06261671685206176
1159069	0.0128479554917	4.504417999619999		114.208455178	0.0	0.08431386200649997	0.0		0.0128479554917	8.426460691003799	0.0	128.53894123041098	0.19598303393204528	0.0
1157641	0.0104461551163	4.56929068155	1.0467343803799998	30.471872878400003	0.0	0.0642964331063	0.0	0.04924854786581128	0.0104461551163	4.971236478665	1.3181019471784998	47.53194400441001	0.19367823676901427	0.12679002822447974
1160713	0.108536246535	2.8111644684099995	1.00007306162	235.459234501	0.0	0.186420874984	0.0	0.016523383534353273	0.08873486633046032	3.767369162873	1.642122016584	239.86452256981002	0.2776997283882173	0.11641055767726073
1157401	0.00405027162919	0.0388686858932	0.0378349442472	1.6723670624200002	0.0	0.357142857143	0.0	0.34885405436415856	0.019352227100019468	23.2568241121352	2.8673470673207997	88.76452727392	0.2993804766418538	0.1239717874916054
5279624	0.014797929707899999	1.15192661641		194.87129352099998	0.0	0.0774526678141	0.0		0.014797929707899999	24.127434668380502	0.0	826.72681999597	0.202394499763058	0.0
1158519	0.00786627466144	0.00192069681361	0.00220880133566	1.39125434731	0.0	0.06865284974090001	0.0	0.0543492805664821	0.0072055116240962265	0.024240380153100004	0.01872679393276	3.4902812082073	0.15055632823346513	0.0340896713681992
1158521	0.00441861257123	2.23250803352		27.378340704099998	0.0	0.07911521237619999	0.0		0.00441861257123	9.22267471758042	0.0	179.208077177462	0.3819775562300726	0.0
1158509	0.0	0.0		0.0	0.0	1.0	0.0		0.0	0.0017682274337899996	0.0	0.0232812401373	0.23361236316770226	0.0
5275860	0.497289974247	0.00301814556587	0.00188634097867	1.5663594774399998	0.0	0.667682926829	0.0	0.5530339224105351	0.06941718421023994	9.22699198416562	18.156976519134762	334.0010067129936	0.39020618556686826	0.453674215753986
1159391	0.008428411838260002	0.658562085679		17.0001126364	0.0	0.184333059436	0.0		0.012158885360591409	0.873132196197	0.0	23.96339801167	0.33325643983077324	0.0
5279310	0.027516613294099997	0.0147820404964		0.0147820404964	0.0	1.0	0.0		0.035733200462458765	13.818175416270401	0.0	181.16819895513044	0.2275627745093932	0.0
1157393	0.0515661232563	0.5982695401179999	3.4284648797500004	205.95951826099997	0.0	0.019721577726200003	0.0	0.01840666450387287	0.034035807171989826	0.64437250292385	3.4679790893595204	256.626154978423	0.07835080759421675	0.07165114668632168
1157361	0.0660075617845	0.042998811914	0.017277894658	0.0449185779871	0.0	0.964285714286	0.0	0.3056278981625072	0.01378509765981827	2.418069596186	0.590703179988	12.2268497632621	0.4779847586791671	0.1284393756878152
1159175	0.021027982338	3.4801353765699994		5.898272701310001	0.0	0.703087885986	0.0		0.026578116942985387	23.906850108003997	0.0	240.47145379101002	0.5092812209965104	0.0
1159397	0.00015056595986200002	0.151804057416		8.423185208260001	0.0	0.0728744939271	0.0		0.00015056595986200002	10.5106541456498	0.0	126.2334651928172	0.4733362566195389	0.09109917562436087
1157317	0.0052900943342999995	0.000194208274479		0.911442298777	0.0	0.000631711939356	0.0		0.0052900943342999995	0.38543313561245307	0.321510111753084	60.4181993413271	0.13276910870151126	0.10726739826016024
1160593	0.004290730591989999	0.0132643965189	0.00312103447504	12.6056359794	0.0	0.00526152893841	0.0	0.0011820814886030725	0.004290730591989999	1.7760689988606	0.29622818397943995	81.426065090506	0.12734317729575798	0.10787998673993797
1158489	0.141595914919	0.022995592735200004		0.0267898655366	0.0	0.386706202125	0.0		0.06655633800949869	16.330720115585617	0.0	16.445503747018616	0.5182918974622083	0.0
1158495	0.0012881797207200001	0.0		0.0	0.0	0.0506032171582	0.0		0.0012881797207200001	0.0	0.0	0.0	0.11365817853281912	0.0
1158081	0.11228584240499999	0.0		1.85642737895	0.0	0.0825688073394	0.0		0.029496282461636325	0.906721607141	0.0	115.28350200175	0.062044681884412624	0.0
1157435	0.0036511099714599997	1.8001023726199998	0.956550353643	2.82426746146	0.0	0.17921146953400002	0.0	0.13657138803193247	0.009137639727780773	3.53759140458	3.5557554982290003	65.27398074405502	0.2638828476145243	0.2687530899276671
5279306	0.395667927201	0.160839473014		0.160839473014	0.0	1.0	0.0		0.05665138015505587	13.803393375774	0.0	181.15341691463402	0.22698623320657224	0.0
1159169	0.00022803405052300001	4.25683453343		25.5933152917	0.0	0.212098202987	0.0		0.00022803405052300001	10.4396647512	0.0	32.255931846100005	0.6015964820038389	0.0
5275498	0.0055074096728	0.0		3.8318000058800012	0.0	0.0	0.0		0.005507409672799999	0.8885783071022021	0.902214290647278	11.019224723589296	0.10874136377283113	0.14183716222344875
5280694	0.010941538104600001	0.100629573961		14.9063395976	0.0	0.08733857009719999	0.0		0.0073767056949054065	0.7454762626919399	0.0	29.547258687836	0.17486471696972233	0.0
1157577	0.10467282164200001	0.120295850495	0.0679386468837	42.7751885761	0.0	0.146296296296	0.0	0.14186117923521988	0.03964794330822961	0.52224164761	0.33930621368220004	59.83525970211	0.3349623563594565	0.21766556480336552
5275552	0.0324539549291	0.00218236155342	0.628448708812	13.441693459300001	0.0	0.0894117647059	0.0	0.14685171553097653	0.058022553264965686	0.882968771046388	1.5146391005064932	38.09945428000528	0.14318706697470676	0.15798958233240715
1158057	0.0187632735651	0.006158469943330001	0.0718488160055	13.4291998838	0.0	0.0251798561151	0.0	0.14570522519908075	0.012392821688352821	0.65053097286718	3.539827905365021	270.055354862223	0.07732388495206069	0.07308139775110886
1159409	0.012019923978600001	0.154510465858		5.71707514043	0.0	0.357843137255	0.0		0.007627518425668512	5.648904648246	0.0	46.67867647688	0.4988094757657297	0.0
1157573	0.04775674771269999	0.158675227314		73.3475680072	0.0	0.138765631303	0.0		0.04775674771269999	1.2734012255963	1.0170008645215	100.314997616054	0.25776850065005885	0.10967092087578584
1158059	0.217042111723	0.030185256066	0.920538075792	1.19201164467	0.0	0.421455938697	0.0	0.501422971852368	0.030282649700718117	23.217955426242003	2.8295121230736	87.0921602115	0.297612884670234	0.117090144352336
1157403	0.00799805009943	4.610308830969998	1.70894430445	95.04978287780001	0.0	0.137552513891	0.0	0.10900445579538776	0.00661622719555021	5.872338163165997	4.60897128482	188.23404366694004	0.19091276019147707	0.15201401992358662
5279270	0.9016297610780001	0.00589828781085		0.00589828781085	0.0	1.0	0.0		0.09380247024605552	3.2181688818554504	0.0	84.77945899081084	0.3194027553300753	0.0
1159383	0.00630825295776	4.07327162515		149.98452134299998	0.0	0.111435189157	0.0		0.00630825295776	13.378612239414705	0.0	284.40268567287126	0.4569737633323199	0.0
1160597	0.0958018321875	0.0032290997551199995	0.0	0.0794801437223	0.0	0.115130127922	0.0	0.10277494489910438	0.09580183218750002	0.18830640779222	0.1933335448268	5.3574998307107	0.2759903291797112	0.27111818255718245
5276602	0.18224940152600005	1.38112087706	0.101428499329	1.43339138438	0.0	0.854572713643	0.0	0.23571957966187754	0.18224940152600005	2.3249237712986472	0.5741328745676471	22.18950812390565	0.584462151394262	0.4764186691950052
1157721	0.0116905562341	0.0		13.4178838072	0.0	0.0	0.0		0.0116905562341	1.799424436	0.0	118.40448376020001	0.06866080950685756	0.0
1159197	0.00509072550052	1.09634660813	1.02858383942	25.160612780799998	0.0	0.374188311688	0.0	0.2556891405262336	0.005718041551858751	3.2549535258999995	2.95369455288	99.63776578299999	0.4997179921037737	0.1539957737391804
5279276	0.758670271003	0.0752009212738		0.0752009212738	0.0	1.0	0.0		0.08340609956406682	1.41045229546925	0.0	5.7128052436846515	0.2969439193448639	0.0
5275974	0.18472510592799998	0.217437478015	0.220114546828	174.863619095	0.0	0.365156181258	0.0	0.41158876796760746	0.1156542151339236	7.978629058753301	7.927823960637398	197.20214436536938	0.6560362173036012	0.6730382997628067
1158539	0.000246805778973	0.0		28.801797982100002	0.0	0.0	0.0		0.000246805778973	9.784108082355047	11.068824771500001	344.86412999738127	0.07276275439113479	0.07468154496352479
1157709	0.09346994096820001	0.513955645059	0.600520728622	40.3965729437	0.0	0.123683276127	0.0	0.1306200286818897	0.09346994096820001	1.353483571641	1.2351724429906	56.9822311632811	0.20381944444419733	0.12046392484357107
1160575	0.0029274922141200002	0.519300296681	0.000416658032918	25.1528560858	0.0	0.0632070389657	0.0	0.0006183715133813468	0.0029274922141200002	0.7702930575946599	0.066175437335876	25.94477578337737	0.19437869822470194	0.11544735175195955
5275842	0.044761036777300006	0.803133740381	0.011318045872	44.271594786099996	0.0	0.036282622533400005	0.0	0.029055149457359382	0.044761036777300006	0.8122154448066201	0.022991183606759998	65.65044656009354	0.3473640629310727	0.3469377579130001
1158491	0.0	0.0		0.0	0.0	0.0425837320574	0.0		0.0	13.28762511659212	0.0	13.28762511659212	0.4399013940834233	0.0
1158511	0.0735684524921	0.0		0.0	0.0	0.422509225092	0.0		0.02199343698329741	14.276956115267579	0.0	58.52270662287109	0.329626461362843	0.0
5275908	0.34972961019000004	0.00478702015243	0.00851025804877	3.75064615222	0.0	0.413412563667	0.0	0.4752304359230779	0.0977139651778866	10.39077657484292	19.55505128256426	337.4360822974245	0.37547638773800396	0.3950807402741974
1157989	0.0199539725598	0.408372043283		16.374998773399998	0.0	0.192660550459	0.0		0.01184243009874907	1.4137316962300002	0.0	23.40655864226	0.28848039215710203	0.0
1160717	0.128886051154	0.4916731816480001	0.0461726356298	23.5205995442	0.0	0.211240310078	0.0	0.020991319339072244	0.128886051154	1.4478778761110005	0.6882215905938001	27.925887613009998	0.3996861924686427	0.24132766185802385
5275894	0.0217092468409	0.00255307741463	0.026223572786	424.27980280199995	0.0	0.0166410650282	0.0	0.025790381061701808	0.0217092468409	10.187219106055382	19.37968767624209	742.9700043083074	0.2162535624838058	0.2577576203199312
1158483	0.0273261729104	8.27616936553		180.440051457	0.0	0.345085265377	0.0		0.02230053866420854	34.44219536331	0.0	260.74328776022	0.5058092948719026	0.0
1158033	0.0065550117587100006	0.056687707227		0.482316149588	0.0	0.191964285714	0.0		0.007668559386356147	7.829587463803603	0.628069625323	103.41287685073799	0.2142055162316932	0.07336302866839307
1157405	0.0611424667901	2.48112385848		52.761184076099994	0.0	0.220664707212	0.0		0.0611424667901	25.533178037237	1.45928932713	137.366930133176	0.2738862982434301	0.06693203344263339
5275806	0.16025207332900002	7.54782304284e-05	7.54782304284e-05	7.54782304284e-05	0.0	0.590804597701	0.0	0.5293574030601869	0.01841944806831921	0.0001111755118472	0.0001111755118472	10.890108006611849	0.6138756968822211	0.5678250213102304
1158537	0.00162648597427	0.00119808048476	0.0894518099813	79.1230324644	0.0	0.00026497085320599994	0.0	0.04738414691354526	0.00162648597427	19.78555814516476	20.7466405929713	361.79754838580004	0.2802392454563186	0.2890151990345133
1158873	0.0137969790678	0.00607543102524		0.029367916577	0.0	0.226744186047	0.0		0.014799282687013762	2.2478906403452403	0.0	117.40799473557699	0.1891248788230576	0.0
1158527	0.0064379327055	37.8131622956	31.9776418046	297.985508753	0.0	0.185814327624	0.0	0.2118724093563344	0.004824690037605935	89.82380755378813	32.0234203886845	529.2229450449502	0.4622376722030112	0.2007805638640123
5280710	0.0071408403148	0.296055172672		4.21738476692	0.0	0.0910815939279	0.0		0.003846676388810672	0.94090186140294	0.0	18.858303857156	0.2073069928914675	0.0
1158487	0.046689235790300015	19.4851908963		70.5997899593	0.0	0.37416481069	0.0		0.03754887533713448	26.16602599778	0.0	80.30323630321999	0.6339827237639267	0.0
1158507	0.0	0.0		0.0	0.0	0.104430379747	0.0		0.0	0.0017682274337899996	0.0	0.0232812401373	0.2155277439359194	0.0
1157659	0.0136503877205	0.280030734832	0.447483044114	58.1633909707	0.0	0.0613281934466	0.0	0.04430427579308231	0.0136503877205	1.2665282270409999	1.394453208453	84.9823853046	0.18625332152364213	0.1036078177085397
5279282	0.725498698724	0.0506430812165		0.0506430812165	0.0	1.0	0.0		0.2123885220935365	0.5214178203391	0.0	16.512419640996498	0.2487038731321552	0.0
1157943	0.0108372410225	0.258495711605	0.0853869273196	63.2488010602	0.0	0.0648116142413	0.0	0.06544469909526401	0.0108372410225	2.14115278785	1.8366957130875	157.65410536257	0.21330339601460108	0.1921293455672777
1158597	0.0174163432275	0.0		3.03149809732	0.0	0.0924757281553	0.0		0.0174163432275	0.022995592735200004	0.0	3.0582879628566	0.2089077930966685	0.0
1159019	0.0271727037957	1.2559331139299998		36.1749640983	0.0	0.0978715069209	0.0		0.0271727037957	12.691906598830002	0.0	181.7576583243	0.15717587728497429	0.0
1158031	0.0198358565425	0.00223168884986		0.006248728779609999	0.0	0.357142857143	0.0		0.0077079148089804345	7.831819152653463	0.628069625323	103.4191255795176	0.21440062399484425	0.07326288901048272
1158595	0.0107541350079	0.193563061679		21.2920901849	0.0	0.08661500902239999	0.0		0.0107541350079	19.800202146714	0.0	92.664234824319	0.22267871815923002	0.0
1159337	0.00392159456136	0.0406113617355		4.45799174381	0.0	0.020292207792200003	0.0		0.00392159456136	33.9467649308355	0.0	123.12021776181	0.1491409152984603	0.0
5276580	0.0432296464924	0.0		16.6538695554	0.0	0.0	0.0		0.0432296464924	0.877978638004234	1.5146345229578233	54.965079558166295	0.102284350494465	0.1151200593359084
1157961	0.00444649099735	1.04351982713	2.69108756878	89.5930380087	0.0	0.206113880871	0.0	0.14954110845473173	0.007375138566429586	1.407042055973	3.027513238009	95.15702337607	0.2477305737108931	0.20126244792691708
1157983	0.00412304229391	0.117581456871		23.2306087877	0.0	0.08610271903319999	0.0		0.003300428051473301	0.7892839325943001	0.0	35.159497442559996	0.14796747967483762	0.0
5292533	0.011983093992899999	4.01687560265	5.125804940269999	35.9831728602	0.0	0.111823361823	0.0	0.09490352989566699	0.03114001273168927	4.8975021479590986	5.6440742555593	69.16847243469	0.16779891304363534	0.0989313948577912
1159121	0.00214243091731	6.9408180797500005		68.72908360529999	0.0	0.109295446831	0.0		0.00214243091731	63.157778564078995	0.108406149287	239.42577284128998	0.5178285025082862	0.2003414818493733
1157391	0.011841627906299999	0.0143697632011	0.125222222181	41.096839437	0.0	0.00217864923747	0.0	0.0198437259883385	0.011841627906299999	0.6649007360682799	3.6650501275460208	272.547979990123	0.05317069356479437	0.057330922450156
1158541	0.00370545720539	0.0246319043727	0.0265861846055	11.478297171300001	0.0	0.0155948109302	0.0	0.01756775031694853	0.00370545720539	37.8377941999727	32.004227989205496	309.4638059243	0.14235377026095294	0.16226241783415715
5275920	0.940569827992	0.00127653870732	0.00127653870732	0.00127653870732	0.0	1.0	0.0	1.0000000000056244	0.11061065569934987	10.38598955469049	19.546541024515488	333.6854361452045	0.3713734851265133	0.3864123284605377
1157611	0.00673769567737	0.232542720914	0.0895901430049	54.3225741679	0.0	0.0879511483777	0.0	0.033033289519022235	0.00673769567737	0.754784368524	0.4288963566871	114.15783387001	0.1888044005822989	0.10841758311648557
1158525	0.00746170999678	3.32632210525	1.5546776858200002	29.0698307625	0.0	0.131098572851	0.0	0.11241426512168487	0.006768254256654668	17.60956177633769	1.5546776858200002	87.5807071629565	0.2187830128883179	0.0954163478587609
1158531	0.00575573349322	9.78396370774	11.068824771500001	316.01634779200003	0.0	0.10157480315	0.0	0.10545914042096033	0.006342472838685747	13.0695595347752	14.033953018833401	422.4005993273401	0.2661668659739167	0.12552225766531191
1157339	0.0147885529079	1.7310431572099998	1.69609563545	5.01485851641	0.0	0.225304878049	0.0	0.17907521159402207	0.015701343751639486	8.059755907869999	8.105383155510001	131.49143717841002	0.13315168495989552	0.1247120620620489
1157501	0.115122650856	0.0		5.95209062228	0.0	0.0645161290323	0.0		0.02298698068200664	0.906721607141	0.0	121.23559262403	0.06204932436526971	0.0
1159729	0.00737999477198	0.0306423011352	0.0114336944534	6.74648575234	0.0	0.378531073446	0.0	0.13899044415356507	0.005778059675276421	3.2855958270352	2.9651282473333995	106.38425153534	0.4973457199734457	0.1537020396829258
5275518	0.0224103711006	0.007355371955779999	0.007624478792420002	1.24732939215	0.0	0.0725308641975	0.0	0.06963328683427425	0.013034164183346329	1.7607899992735612	1.761596947137028	22.229010960696893	0.1574263203969376	0.1630645319404938
1158493	0.0478326804994	0.00350682789212		0.00350682789212	0.0	0.352676205617	0.0		0.030784538916223673	13.292643175232534	0.0	13.29341518425414	0.5571635311140842	0.0
1157469	0.12417588577199999	0.613579900644		6.0192690524699985	0.0	0.277558457334	0.0		0.10931022186501832	1.751551694862	0.0	25.54006808226	0.3045778528913545	0.0
1159335	0.037271586034	5.06445245251		74.45083937359999	0.0	0.276993034056	0.0		0.0207010165923686	20.927872638608	2.19600181218	130.02883696683	0.4117360472042835	0.02643589898347937
5279322	0.20535297180700002	2.23211127811		3.5690866478300007	0.0	0.6006825938570001	0.0		0.03318305586950731	2.8332475916284	0.0	24.530561064226397	0.33727442439350097	0.0
1157759	0.194545513147	0.450352772896	0.427464889071	1.39077552885	0.0	0.392628205128	0.0	0.3746939742592939	0.06466585126965979	0.977838693303	0.7119515226513	3.231788491483	0.459523062441201	0.3372453532573122
1157371	0.011508221437	0.750160293421		15.861475211099998	0.0	0.110091743119	0.0		0.011508221437	16.144928351531	0.6340673102100001	37.748845958779995	0.3099570480278343	0.08085325476210221
1157451	0.00468204990076	0.5425346308619999	0.227133830253	5.24363707268	0.0	0.0490946187197	0.0	0.025859680315827804	0.00468204990076	2.1350109390450003	2.6988527172000003	65.720587768345	0.17430495771482135	0.17271431739372625
5279268	0.00878837443354	2.52439198166		63.687153306899994	0.0	0.0799827530452	0.0		0.010666972240287769	23.58867150666	0.0	661.8754620584	0.25874937159227873	0.0
1159083	0.00374585720677	0.110200064286		0.225607240311	0.0	0.0627342349682	0.0		0.00374585720677	3.539874926686	0.0	33.694944267680995	0.1695563377223527	0.0
1157527	0.00562685966092	0.0127101287944		40.8435310831	0.0	0.00503727584123	0.0		0.00562685966092	0.07677366037380001	0.0	41.99768232829	0.05523949348504409	0.0
1159163	0.00158351909625	1.14453360264		10.1147625654	0.0	0.15135688684100002	0.0		0.00158351909625	6.3781632241449975	0.0	35.17191267513999	0.44967091924273056	0.0
1157941	0.011730729305799999	0.0622240716766		40.9008675468	0.0	0.0932242990654	0.0	1.8091264477728977e-05	0.010810483606525364	4.132575137356602	0.628069625323	76.41217587119998	0.22226662860433896	0.08580311974148057
5275560	0.11210573160999998	0.00408754116506	0.0043600439094	0.72156045663	0.0	0.128205128205	0.0	0.13535505275053605	0.03900450897929544	2.2652904847129687	10.141788276404492	75.15903483940527	0.14494518879427354	0.16273131996241094
1158517	0.00480220444354	0.519858865533		2.20212812872	0.0	0.185134205093	0.0		0.00480220444354	14.804866764054479	0.0	60.71477275661029	0.4998614190690418	0.0
1160601	0.00221376442109	0.36002971994499994	1.36330041109	8.820915930189997	0.0	0.00668380462725	0.0	0.031282873556748275	0.00221376442109	7.6393555709777	10.2188691647611	226.53827181212608	0.14217598612898233	0.1780047466580853
1157519	0.0303893597879	0.29423670948		29.680113302	0.0	0.07122416534180001	0.0		0.029864350629779338	0.906721607141	0.0	113.4270746228	0.06162898730257424	0.0
5279288	1.0	0.00266314164764		0.00266314164764	0.0	1.0	0.0		0.17777211020163078	4.948252743495639	0.0	126.58294030601765	0.2119578737875681	0.0
1157311	0.0128024728911	1.9941994628		8.17340971025	0.0	0.397727272727	0.0		0.007736496888373809	7.772899756576602	0.628069625323	102.93056070115	0.21445140911141106	0.0741741099783837
1157449	0.035822669629800005	0.38507337519	0.322026884824	34.307326103899996	0.0	0.0505939287286	0.0	0.0356496860667805	0.03635966670874194	0.4483262059806	0.334875334986	136.9069171859	0.0830549551320272	0.05603831538483568
1160605	0.838973862259	0.0	0.0	0.0	0.0	1.0	0.0	0.999999999993015	0.1417052127492828	1.7659923641170998	1.5915544652968003	120.9790097289884	0.3581864738662036	0.32837334451683625
1159107	0.0	0.0		0.451279379529	0.0	0.00877192982456	0.0		0.0	12.0002260342	0.0	42.155115934529	0.15501165501164618	0.0
5275986	0.998948015572	0.000324220345647	0.000324220345647	0.000324220345647	0.0	1.0	0.0	1.0000000000316265	0.19431289656360712	0.9438028942386468	0.472704375238647	20.756116739525645	0.5652405846579014	0.4935472611846132
1160715	0.304480433407	0.483918782789	0.194032940897	3.18764483358	0.0	0.303964757709	0.0	0.12074613699909775	0.20065870993379065	1.2957330111827	0.9379241178687	85.2687831629537	0.31909282700390024	0.25514315414209426
1158589	0.00719471203716	4.21472619439		42.4787640821	0.0	0.08229166666669999	0.0		0.00719471203716	12.597009046175005	0.0	264.1626303982	0.18960356282417293	0.0
5275970	0.105632269519	0.231201607916	1.9686475452	273.044951207	0.0	0.301724137931	0.0	0.2890537801444627	0.105632269519	7.992393188654301	9.676356959009398	295.38347647736936	0.7208970702617121	0.7116311810210925
5275906	0.0817785042269	0.00345729233231	0.7452954055040001	19.1440227348	0.0	0.164141414141	0.0	0.27999103328858205	0.052234456968243866	10.389446847022796	20.291836430019487	352.8294588800045	0.3641034727141936	0.3826789095299836
1157397	0.047695254217300004	0.0392959505261	0.0315233691072	0.556899479823	0.0	0.0983188996434	0.0	0.08801656906471833	0.03678196597472886	0.04610296280585	0.03951420960952	50.666636717423	0.10411992657557023	0.09505352463924377
1159325	0.00972175699344	1.97619264032		32.1286492001	0.0	0.0202507232401	0.0		0.00972175699344	7.178047821146	0.0	107.14044466636798	0.1941380781185172	0.0
5276486	0.17033443857799999	0.0	0.0	10.8899968311	0.0	0.4700908236770001	0.0	0.411000361338156	0.06800184249716627	0.1268884682504448	0.11707528308744485	16.572561220688446	0.5526528413680328	0.5216685318267688
1157409	0.0162786944884	0.200847817585	0.0447931839153	40.625692723200004	0.0	0.0270078809882	0.0	0.01117698522950559	0.0162786944884	10.979288062785	3.2929945806553005	316.6556898383	0.07060185185186144	0.04872282787928163
1159173	0.046973870595199994	1.08877509815		1.68426533207	0.0	0.631313131313	0.0		0.02707609028429389	21.247803535018	0.0	225.455064710618	0.5196933095266479	0.0
5276308	0.017944531210900002	0.733110854679	1.28919549755	47.4764332293	0.0	0.052595783269100006	0.0	0.13860235278016195	0.015300601667632047	18.945336530159008	27.88233665191	505.89638089010003	0.17184942716869778	0.254369267883763
1158113	0.022295070368200002	0.00551425735466		75.58432071909999	0.0	0.00678294573643	0.0		0.022295070368200002	0.9122358644956601	0.0	196.81991334313	0.050991226794630855	0.0
1158101	0.0145396438245	0.0114279031259	0.0622338820831	25.3454398878	0.0	0.0315430520034	0.0	0.09668089578153816	0.0145396438245	0.87136406065116	0.8277986101089001	42.750881778435	0.09290168167819236	0.11715598154929067
1157649	0.020939354351	0.131718569544		16.7639531303	0.0	0.0957459207459	0.0		0.022038658510094827	2.785728154554	0.0	44.4599076889	0.1721053017527245	0.0
1158599	0.134811770951	0.106113486255		41.2438148591	0.0	0.205513784461	0.0		0.019206791892461286	8.382282851785	0.0	221.6838663161	0.32657470500289865	0.0
5280708	0.0023566270419	0.00896456190094		4.31258013536	0.0	0.0214019242097	0.0		0.0023566270419	0.119223707228467	0.0	21.084537706807	0.09790165189106366	0.0
1157821	0.014810479428100001	1.799424436		104.986599953	0.0	0.0878093135026	0.0		0.014130120370914687	4.0473150763452415	0.0	222.394594688577	0.13079569249195208	0.0
5280742	0.000678748671664	0.00202593801077		10.5291559284	0.0	0.0036496350365	0.0		0.000678748671664	0.3074349330637101	0.0	16.574105309156	0.11450878334417285	0.0
1157425	0.00527465711735	0.000382260754122		0.415856270032	0.0	0.0015368852459000002	0.0		0.00527465711735	1.022334204681122	0.0	22.810124095901994	0.14761536976267178	0.0
1157945	0.0148578331828	0.0184622575762	0.0214561371831	3.76239727525	0.0	0.029558343358	0.0	0.038932862771250784	0.014857833182799996	1.7890911562558396	1.76562017298912	9.54567321402825	0.11861296242647293	0.1144414423101482
5279308	0.0325335536135	2.2724276067400004		56.5163299794	0.0	0.122851919561	0.0		0.0325335536135	9.7173586582773	0.0	160.51222462791995	0.2401899270813275	0.0
1157325	0.018528814209999998	0.05345881605169999		156.04473759299998	0.0	0.0505485491644	0.0		0.018528814209999998	7.4414531345417	0.0	341.744378275	0.12147009966790825	0.0
1159015	0.00911518112266	2.0876482165		74.67162880229999	0.0	0.113508760062	0.0		0.004901463877998869	7.15210066901	0.0	149.1224681759	0.18077948962933885	0.0
1157713	0.006488325418	0.267780650407	0.270191771124	40.4091942461	0.0	0.0374493927126	0.0	0.04017445102774669	0.006488325418	11.002765468706999	8.854470346993999	308.77695770310004	0.10066215667065306	0.08654557084851165
1159123	0.0723128957529	0.968597050203		10.116393243500001	0.0	0.188465405356	0.0		0.0723128957529	1.252447425242	0.0	11.548776921840002	0.23493859394666106	0.0
1160595	0.10013139809699999	0.0	0.0	0.0	0.0	0.48623853211	0.0	0.2757738722418168	0.10257882705209047	0.1850773080371	0.1933335448268	5.2780196869884	0.4046813310772964	0.3793144601864445
1159349	0.0014126123625699998	9.90664899279		46.322882217	0.0	0.08047115808010001	0.0		0.0014126123625699998	29.868563775521	0.0	229.5207584881	0.1620924769379729	0.0
1157433	0.057938493783	0.0		19.4325100678	0.0	0.0	0.0		0.02377747684929991	0.38507337519	0.322026884824	59.38133177512999	0.04766839378242811	0.033588284530483764
1159369	0.0370462612987	1.17499847099		20.2817279858	0.0	0.133735735169	0.0		0.0370462612987	55.221397614009	0.0	133.28578070205594	0.33423808608745986	0.0
1159385	0.00134340800399	0.00949866365409		16.5564534799	0.0	0.0313090985501	0.0		0.00134340800399	0.22517939034148998	0.0	26.448194157320003	0.20481489562870786	0.0
5275874	0.0	0.0		23.0262409869	0.0	0.0	0.0		0.008954557307598412	0.217437478015	0.220114546828	212.37251316330003	0.35311572700272825	0.3965838361976989
5275686	0.10661874326300001	0.292019171906	25.0431459464	88.5316214515	0.0	0.175683709869	0.0	0.30798295659802544	0.06616949084465631	0.6742192177372001	25.4647147318155	162.79186263419192	0.26708796397200546	0.32198536973876
1159021	0.018518671571400004	0.137402728316		0.5609560926680001	0.0	0.244943820225	0.0		0.01101052307975842	5.2018551808260005	0.0	75.01179546626798	0.2744521646181245	0.0
1158063	0.0174356736707	0.423076067527	0.476059401873	3.629021110280002	0.0	0.189833200953	0.0	0.170973230110306	0.009983509207618773	2.501946677857	1.683486350142	9.084803458835	0.31211599901691794	0.2754100838813728
1159195	0.026065635318400004	1.27011219156		10.5077047916	0.0	0.557591623037	0.0		0.006785146026471459	52.00578487705801	0.0457785840845	231.23257591082	0.7922246708480716	0.18757991175465602
1159089	0.00305552906535	3.21223602843		24.2417076684	0.0	0.0896976763555	0.0		0.00305552906535	6.641910890829999	0.0	57.71104469577	0.15905549977513234	0.0
1157385	0.0063386490242099995	0.218053023389	0.310896257026	34.916449689000004	0.0	0.0259415833974	0.0	0.04862476171123463	0.0063386490242099995	5.871881681488999	4.710928130256	219.5592705755	0.13466963622868205	0.10874483879739652
1157763	0.0565129149471	0.522420332243	0.291513500968	2.95068705257	0.0	0.172971562745	0.0	0.13817873377714754	0.0565129149471	6.991126823293	1.6159248771739998	46.20583087545001	0.35440432284109297	0.1676488734547498
1158111	0.011886944391499999	0.0		3.96091444697	0.0	0.0	0.0		0.011886944391499999	0.466754848836	0.0	52.96540990517	0.06518060337281457	0.0
1157431	0.00503970224906	0.228789225104		12.6212036862	0.0	0.08633895000700001	0.0		0.00503970224906	2.3147754422639997	0.0	38.387834593600004	0.17995744993050158	0.0
1157437	0.005055188752340001	0.218509505066	0.20893941159	3.5912227804400003	0.0	0.309564474808	0.0	0.2955734157039414	0.009865073219842093	1.955998537026	2.8081445561760003	66.04093606303502	0.2755082031502141	0.28009038566299393
1159365	0.7505035417199999	0.0120766303153		0.0121300637547	0.0	0.957250628667	0.0		0.09508759675722324	54.2864253262705	0.0	113.23914479904388	0.5917003692631972	0.0
1158513	0.0	0.00393742846791	0.000864313566126	0.004993811715390001	0.0	0.0568225744105	0.0	0.003646587448706625	0.0	0.005705655901699999	0.000864313566126	0.02827505185269	0.18943199381734646	0.0009112946029563408
1158529	0.0156996794215	0.0058581252815200005	0.003553289105179999	0.211214480601	0.0	0.07657800534689999	0.0	0.002690048512216009	0.0156996794215	0.02817780862101	0.020071281702279998	2.3102413414983	0.11890523651313595	0.007215364776854884
5275620	0.030117991087	0.0017568840085	0.0015066599698900002	33.3397556652	0.0	0.0109319992588	0.0	0.016304536987628532	0.030117991087000005	1.6411778110883213	22.58546368306941	245.289815627276	0.13114864410188265	0.16101528022058773
1159091	0.035662572702900006	10.197800641499999		192.314139587	0.0	0.129990687929	0.0		0.028228810925994663	14.8459414354	0.0	202.17608609392	0.1743465308473731	0.0
5275862	0.661579087889	0.0	0.0	0.0	0.0	1.0	0.0	0.7821637114268372	0.5360453674235705	9.22397383859975	18.15509017815609	332.43464723555365	0.3884558668631462	0.454462685807584
1157587	0.009762011041129998	0.0574901846703	0.0174052852672	28.153415213600002	0.0	0.0494892167991	0.0	0.015303371168143787	0.009762011041129998	2.8221602286803	0.6509761840571999	193.8256405546	0.09243045072260064	0.03775097421777888
1157663	0.00037783154500900003	0.0		1.04338170629	0.0	0.0	0.0		0.00037783154500900003	1.850359701701	0.7537797183030001	49.25262040524	0.3771510946929077	0.17486381227958075
1158053	0.005551588372909999	0.0447907492562	0.0653071534034	8.47170204156	0.0	0.06256583105119999	0.0	0.09557565343612792	0.010386659261395172	6.147912532166197	3.1020175873434	140.81906602976002	0.08409033024882387	0.0786334023863536
1158479	0.005864572982300001	0.025715327356		31.6449875964	0.0	0.0794551645857	0.0		0.005864572982300001	10.321579392756	0.0	828.0357175514	0.13175897908190112	0.0
5275536	0.00425590022243	0.0	0.0042160556186	2.50479276634	0.0	0.0	0.0	0.027183193817627963	0.03265437450650477	0.877978638004234	1.5146345229578233	38.3112100027663	0.11691348402192744	0.131585009365635
1157441	0.017738933510599998	0.232771867071		44.3537010875	0.0	0.0975094976783	0.0		0.019971665877470426	2.45100554762	0.639057436308	90.47945391263	0.2544964426181885	0.08832486245703093
1157723	0.0357454367276	0.205771066365	0.076215776382	38.718676712800004	0.0	0.041006752609	0.0	0.01539753971245886	0.0357454367276	2.170073308838	1.8978106139972999	71.31351933260302	0.1429392741645477	0.10211268044058112
5275538	0.0231012968921	0.268214827127	0.343873776219	9.99495986367	0.0	0.0218242865137	0.0	0.038438591894183714	0.0231012968921	1.145473492095935	1.2255230800069479	33.00598149737586	0.13997827923264888	0.15308222167364124
1157537	0.00451606538605	0.0		19.1432040075	0.0	0.0	0.0		0.00451606538605	0.046930489217600006	0.0	46.7816660458	0.0465292336361414	0.0
1158065	0.0792421119014	0.0		13.950242230599999	0.0	0.0	0.0		0.02061239860304655	0.38507337519	0.322026884824	73.33157400572998	0.04578936890308891	0.032264278889027304
1157321	0.00557750792443	0.020579539312200003	0.015331066199	13.115193077699999	0.0	0.0737161789067	0.0	0.04997830897202362	0.005443454974171961	0.3852389273379741	0.321510111753084	59.506757042550106	0.18393053687186514	0.14879957178243824
1158485	0.0236634457609	0.0		0.0	0.0	0.0660547156228	0.0		0.0236634457609	0.022995592735200004	0.0	0.0267898655366	0.2561904761904782	0.0
5275570	0.006942522838579999	0.0008467239676970001	0.645284455037	103.98001077100001	0.0	0.00238907849829	0.0	0.002957731193693496	0.0069425228385799976	3.814002103486197	16.6860792916998	256.26210132709997	0.0916800858831029	0.12795671475524625
1158907	0.00135327968178	1.55873585725	0.115236036479	31.5052275502	0.0	0.0305515685872	0.0	0.003539409175818917	0.00135327968178	6.19741406322	2.8006352115590003	457.7492395292	0.13019297775374586	0.09715584104821597
1158899	0.00433311168238	0.014019328140399998		1.09002366712	0.0	0.0221424296828	0.0		0.00433311168238	5.1671754804804015	0.0	52.42403624482	0.20006369426761086	0.0
1159305	0.000980314310592	0.551874336204		49.5813354754	0.0	0.09498929875360004	0.0		0.000980314310592	2.639522552704	0.0	124.2529642777	0.10391600639069536	0.0
5279628	0.0055757673503099995	0.131865420168		56.79529354939999	0.0	0.0670049888182	0.0		0.0055757673503099995	10.4470920931757	0.0	263.1344126431374	0.19488303439649002	0.0
1159177	0.0108456939289	0.0611702608294		4.17466553699	0.0	0.190054911531	0.0		0.003345841329053095	0.2156807266874	0.0	9.89174067742	0.29666295884306765	0.0
1158593	0.00709757801045	1.99860237999		135.81912149	0.0	0.114333753678	0.0		0.00709757801045	21.605241465025	0.0	207.19126612941898	0.22232472324706545	0.0
1157497	0.011603040040899999	0.333555009798		14.5718322752	0.0	0.147210657785	0.0		0.011603040040899999	0.820957061109	0.047823382885300005	16.882421336489998	0.3739022742623211	0.12580766113147238
5275714	0.020523303278299997	0.0	0.0215284810984	52.5447536809	0.0	0.00335457900034	0.0	0.01426275147029089	0.020523303278299997	0.475717847123	25.280366748991398	188.70452481400002	0.16501273381929002	0.2293618013527471
1158497	0.0179675878116	0.0		0.0	0.0	0.145703823554	0.0		0.012347198929754149	13.28762511659212	0.0	13.28762511659212	0.31736471027651153	0.0
1159357	0.0495057369962	1.7843073108400005		16.3370090106	0.0	0.211903929113	0.0		0.0495057369962	2.3792171132105007	0.0	18.45584380664389	0.3700422117274475	0.0
1158501	0.0	0.0		0.0	0.0	0.0959360426382	0.0		0.0	14.276956115267579	0.0	58.52270662287109	0.2946864111496991	0.0
1157551	0.024158511854400003	0.213082886301	0.049314974923599986	27.09151405	0.0	0.0511781099569	0.0	0.01168226114664298	0.024158511854400003	2.977752930311	0.6828858737135999	192.76373939099997	0.07906155982420147	0.028705291779296725
5276306	0.025475921674200003	1.86308355781	2.6857006782200004	46.8553587411	0.0	0.0785234899329	0.0	0.13434276074701068	0.025475921674200003	8.083755361766599	18.01598243301689	265.9005349847643	0.2021465041159557	0.2843303525291743
1157977	0.17027581286200005	0.133755513933	0.123390336987	0.6587523001650001	0.0	0.486427795874	0.0	0.4408319486203916	0.17631939035386013	1.5924763081830002	2.4717188869470004	60.476950695664996	0.2567828643422671	0.2694496440602428
1157479	0.00909253150574	2.35555917397	0.342563578539	126.848944011	0.0	0.0425758898264	0.0	0.04665200203278678	0.00909253150574	11.733375892464199	1.6060686111449	193.53314748368197	0.13024822367808095	0.09274702881339672
5279274	0.8738361258949999	0.0185662014046		0.0185662014046	0.0	1.0	0.0		0.10379092946484544	3.20648525122213	0.0	82.88138135771213	0.3914773830327717	0.0
5276426	0.155251747725	0.0	0.00326970330207	5.22875743164	0.0	0.096837944664	0.0	0.12904272894315935	0.06341008637986054	0.880083865861334	1.512670571558443	36.20307970468029	0.12454116413223094	0.13890083853433374
1157581	0.5254357906539999	0.0170477516949		0.0250798654743	0.0	0.568306010929	0.0		0.059228567247904436	1.1147259982823	1.0170008645215	26.967429608853998	0.3070624930380547	0.15509938464726958
1158535	0.002043527582	0.08087009381419999	0.0809282085174	10.9214902861	0.0	0.030589770780700007	0.0	0.02968789318201167	0.002043527582	37.8940323894142	32.058570013117404	308.9069990391	0.12882939538245192	0.14499012912451867
5275994	0.688999680069	0.04645495997830002	0.04769682056940002	0.04769682056940002	0.0	0.974789915966	0.0	0.9999999999979782	0.2325217401954464	7.761191580738301	7.707709413809399	22.338525270369395	0.9011865035222336	0.8933849018282449
1157521	0.014859768955999999	0.334179535275		110.86746211799999	0.0	0.0527349228612	0.0		0.0136890540817144	0.946664432936	0.0	194.6144234388	0.05586940572270036	0.0
1158477	0.018198221841500002	0.0387429385737		35.8717673194	0.0	0.0264856443356	0.0		0.018198221841500002	10.3346070039737	0.0	832.2624972744002	0.10906771553114222	0.0
1159387	0.00087578036027	0.045698697737		0.129137753393	0.0	0.08550185873610001	0.0		0.00087578036027	0.2613794244244	0.0	10.020878430813001	0.18571503985638926	0.0
1158533	0.0009724646727500001	0.0	0.0	0.000737397705961	0.0	0.0	0.0	0.012732009813104059	0.0009724646727500001	3.32632210525	1.5546776858200002	29.070568160205962	0.11708907662666755	0.10176198913569304
5275786	0.012043198037600001	0.0034172997111500004	0.005247995984970001	27.9930325819	0.0	0.00993260021284	0.0	0.015150216280640812	0.012043198037600001	8.60059526202015	11.382006164810967	160.67367151620002	0.2288664632718567	0.2525906234493746
1160705	0.0309081971334	1.73734787224	0.266618389804	68.7715797101	0.0	0.14515496273	0.0	0.10028461575380644	0.017933540098920082	3.5033402363571	1.8581728551008003	189.7505894390884	0.29908576403967085	0.2650953547892609
5275486	0.00119857843262	0.0		1.54618927818	0.0	0.0	0.0		0.00119857843262	0.733110854679	1.28919549755	49.02262250748	0.0442917143948072	0.11671916344278242
1160707	0.223981555608	0.025456730101700003	0.0264887597004	0.048849401005999986	0.0	0.3710743801650001	0.0	0.4174179479150048	0.12703133096075594	1.7659923641170998	1.5915544652968003	120.9790097289884	0.3577027434425272	0.3278671441433993
5279808	0.435964607231	0.911214197258		1.06773494784	0.0	0.95883470551	0.0		0.17527448119443034	50.02465516148101	0.0	283.82458895296804	0.4553052405287624	0.0
5276458	0.00153441815695	0.0	1.51203043372	13.715291367799999	0.0	0.191441441441	0.0	0.2876457713623629	0.004859062208659269	1.6437644996435	17.61193490222	262.78751784490004	0.2059659090907586	0.2335424526965796
5293111	0.117496156961	0.022368099053000003	0.0190874445252	0.0263446499957	0.0	0.8490566037739999	0.0	0.7227750117518508	0.035015017580429984	2.650449939851	2.1298397309455	19.6950870935757	0.3063639270864909	0.21503498203069696
5276378	0.008239722716689999	0.6040434915699999	0.331353154383	23.4244400705	0.0	0.321190354028	0.0	0.3700996553776872	0.010884553663200892	6.532409298585999	10.152883461181	136.025123191	0.24061450808857104	0.2647426791913364
5292535	0.0148796977584	0.16966711692699998	0.042778965435	80.9870798404	0.0	0.0222799048237	0.0	0.01833596895398549	0.0148796977584	2.47622063816324	1.5956933663343	117.4551353196157	0.1728483119352386	0.13911470240538376
5279256	0.323993531572	0.0589342002058		0.0630339706549	0.0	0.935742971888	0.0		0.046656986364195234	4.657931313380802	0.0	25.602011851822898	0.5024573202280026	0.0
5293723	0.00589968326235	0.000402663339628	0.0032213067170200004	2.5114788545	0.0	0.0010643959553	0.0	0.009243223396129496	0.00589968326235	2.774448410094228	1.7785328769124198	50.34327269470001	0.1594330293376292	0.16100844814458515
5276498	0.481397322294	0.0	0.0	0.0	0.0	1.0	0.0	1.000000000006225	0.0916514980074578	0.1268884682504448	0.11707528308744485	5.682564389588445	0.5702533298508563	0.5498226197786744
24716082	0.294507515826	0.00717633054592	0.0089704131824	1.32553087859	0.0	0.961538461538	0.0	0.9721601344023021	0.2068601376078275	14.03023393953192	14.713220464822399	23.27849847348	0.7640934106798771	0.7689183294329828
5276420	0.0	2.57806290369	4.3428429183800015	25.5947309919	0.0	0.137168141593	0.0	0.15756975436853146	0.03714630911440989	3.189284113964	8.987215593648902	547.0461374792	0.1180117467916636	0.1441054599142342
5276438	0.0	0.000136251372169	0.0	0.0083113337023	0.0	0.417475728155	0.0	0.4163511633620568	0.03468823226793153	2.2609304408035698	10.13661072426208	73.49805341317128	0.15644746080051655	0.17611701123736928
24716076	1.0	0.0	0.0	0.0	0.0	1.0	0.0	0.999999999992627	0.5399972808185997	9.22397383859975	18.15509017815609	332.43464723555365	0.38049509176255975	0.45019683805624505
5279710	0.730996801326	0.0		0.0	0.0	1.0	0.0		0.8379816418340287	1.0929603182151002	0.0	12.498404926558099	0.7303449238932358	0.0
5276432	0.0852950923367	0.000244793936872	9.79175747489e-05	0.00656047750817	0.0	0.368055555556	0.0	0.3490705039487588	0.07894131938964581	2.2611752347404424	10.136708641836828	73.50461389067944	0.16334616255392148	0.1817555222064524
5279696	0.888773349588	0.0168084370671	0.012774412171	0.0194977869978	0.0	0.968253968254	0.0	0.9235385741477984	0.05113722141923988	94.43405797058405	151.30383282118797	3418.1737019160146	0.19342598968467706	0.19887447039191944
5275216	0.00922836474538	0.0		3.23471568401	0.0	0.0	0.0		0.00922836474538	6.590651049208	8.80812534891	215.36265119771	0.07820335780216915	0.09194664662663828
5275224	0.0229767314359	0.232604321558	2.10361451097	175.295786003	0.0	0.0937794533459	0.0	0.10120024236258032	0.02355655654256704	11.469538749338	19.668481416925	440.2418644314	0.13792674326951038	0.14605884230434352
5292495	0.009966848413540001	0.977860490661	0.972951815522	32.6669199024	0.0	0.0401396160558	0.0	0.030866527089875168	0.009966848413540001	3.0432101155645004	4.0364994069928	96.6609477981	0.07275149900066928	0.07201188784832616
942010021	0.373213719318	0.804329504201	0.0	3.5124787160900004	0.0	0.530352941176	0.0	0.02329178549241356	0.04564235399893124	231.457752992942	36.370913006100004	2707.051730529391	0.3135396673059899	0.07702923770258867
5279694	0.0342917987673	94.4129441645	151.28675304	3418.14989876	0.0	0.189953280921	0.0	0.19550512467750567	0.0702309047505345	128.363361559455	188.35311502119097	3822.544470723	0.2165399759701259	0.2149376771680968
5275814	0.944298508928	0.0	0.0	0.0	0.0	1.0	0.0	0.9661772306422852	0.8762507341287455	0.0	0.0	0.0	0.931656561120078	0.9013763482555224
5279370	0.033535548012399996	0.00525945963454		102.520326769	0.0	0.0955737704918	0.0		0.033535548012399996	15.63605505793454	0.0	172.40261767459995	0.290756083240687	0.0
5279788	0.11686025627900001	0.0136402760836		2.14825287692	0.0	0.486080178174	0.0		0.03893035873206894	10.3378594047873	0.0	232.78434756552002	0.3843663586700247	0.0
5276354	0.11763509314099999	0.0730645373551	0.06940223668060001	0.231322702122	0.0	0.438860971524	0.0	0.4255820218945393	0.03269225412241313	4.740271081720099	5.648570874815601	139.58474332380098	0.19951307022056905	0.21588888859597924
5275794	0.764718341338	0.144662622872	0.15224632120200002	1.49157675401	0.0	0.91958041958	0.0	0.930978377797262	0.7163445109373593	1.271479117352	1.051810746634	4.16608804884	0.9455252918286264	0.9225349141756308
5275526	0.0139618588321	0.000468635407742	1.4402954754799997	26.3866342135	0.0	0.00220628792057	0.0	0.03824743393896032	0.0139618588321	8.676989451336484	9.804431890718467	292.8514283836	0.06319479218834698	0.06964398934111106
5279816	0.325045211513	2.28774380576		7.23166939613	0.0	0.5803357314150001	0.0		0.35239516886577743	49.113440964223	0.0	282.75685400512805	0.417827429352191	0.0
5279868	0.0733096955526	0.0	0.0	0.0	0.0	0.833333333333	0.0	0.9999999999345164	0.13854200496701868	41.125371263601906	29.289788476020174	546.6094225336301	0.505036735825674	0.5306560692128065
5294197	0.005013829585100001	0.000119366050058	0.00716196300345	7.276522219939999	0.0	0.0319612590799	0.0	0.07543167375139613	0.005013829585100001	5.983558036916058	4.03849035765535	95.62319441544001	0.3589021176044673	0.3616663724242321
5293747	0.00235238130752	0.0072223000461199985	0.0314170052006	5.45686951926	0.0	0.01953125	0.0	0.08545023286101955	0.02291770610608562	3.04091295691912	4.5303827454536	42.27825783472301	0.29173228346436275	0.3367306857555872
5276476	0.00205260776142	0.249052787185	13.089407399	147.86969364799998	0.0	0.239418710263	0.0	0.2910796874294805	0.007389880132797157	1.728109675339	16.42796339873	253.34940951183998	0.2881113887896739	0.3104247754024813
942010020	0.750551783528	0.0319971670106		0.0319971670106	0.0	1.0	0.0		0.05890464815086292	230.6854206557516	36.370913006100004	2703.571248980312	0.30893373550125713	0.07884157485745404
5293721	0.8382756169050001	0.511452608578	1.10275443427	1.10275443427	0.0	0.916247906198	0.0	1.0000000000007172	0.6897118826012034	0.8242746180293999	1.4052343521814998	4.108598960296	0.7459603190837715	0.7481704732083548
5276460	0.00423111934996	1.3845040752200002	9.25559788471	50.5012740187	0.0	0.14095851792199998	0.0	0.17489735749961988	0.011954002253386746	3.0282685748635005	25.35550235321	299.57350049580003	0.19490254872554588	0.22143153352319064
5276372	0.014872481073600001	0.636979086179	2.39263853511	39.8303988549	0.0	0.354769560557	0.0	0.3676675079572313	0.05809069794013955	7.064327994771758	12.465824643529697	226.9867109463	0.2406367761286696	0.2623163225313743
5279792	0.0497126928943	0.0107082541217		0.0108357333374	0.0	0.5858652575959999	0.0		0.010661254814054355	30.3598753354077	0.0	707.0639131977374	0.3381192242099729	0.0
5293349	0.5816669427310001	0.0539997061278	0.0488714918756	0.0539997061278	0.0	1.0	0.0	0.9180662870744994	0.2596018257058447	3.23366877730679	6.909107842294589	18.741153593166803	0.5883603507836386	0.6338819735104321
5293709	0.010560509532700001	0.0221872632246	0.0438422578154	26.431989128	0.0	0.039398280802300005	0.0	0.08908884569746955	0.007886404933619803	2.7740457467546	1.7753115701954	47.83179384020001	0.20063694267540225	0.2004943048743481
5274456	0.0353762248108	0.00039229747199	0.0020279258606	0.00809166845283	0.0	0.666666666667	0.0	0.789437109468881	0.04901596619586735	27.50362699484199	78.2646217801606	815.8964234154528	0.1839464882945261	0.2198073552572876
5274452	0.232426601608	1.16039238525	1.29794245116	6.401601661290001	0.0	0.393710691824	0.0	0.4382807825105615	0.049072293203594616	28.664019380091986	79.5625642313206	822.2980250767428	0.19672131147561475	0.233112577768882
5279490	0.196722081647	44.70715617689999	40.0174425119	730.682229345	0.0	0.623060708263	0.0	0.6093184582286055	0.13901837582404025	45.36690441518172	41.210904822818996	744.1658573819791	0.5544622229828412	0.5417647410131922
5280874	0.31627144973099997	0.01310366916		0.031303209660099994	0.0	0.8643216080399999	0.0		0.14191833975626808	230.93515237568198	36.370913006100004	2703.8435481304628	0.3134700094680613	0.07828412392987726
5279686	0.00318850197331	25.963788436799998	27.6232355535	165.607148636	0.0	0.328284299447	0.0	0.3417079109785154	0.032854335884047424	33.950417394955004	37.066361981190994	404.39457196300003	0.3590888451645802	0.3191284529669384
5275746	0.049189395153800004	0.0376323143573	0.0353428959934	5.903235820569999	0.0	0.0882254277088	0.0	0.08265189299831635	0.049189395153800004	1.1644488088373002	0.9349073214254	8.5777471154	0.6651035113805309	0.6323028525868645
5293509	0.07092724830689999	0.0061038132626	0.006203875775100001	0.006203875775100001	0.0	0.303082191781	0.0	0.7729696728794107	0.04228807230719856	0.487533096497116	0.577635632020516	0.7104919746053161	0.7326940365598258	0.8292486842343597
5280758	0.014376180760899996	3.66520086206		60.235254725299995	0.0	0.137900835354	0.0		0.013322139996826654	5.47895599177	0.0	122.8688672928	0.14457187633558313	0.0
5293755	0.21479176097	2.04457258831	3.50984767169	35.8322702469	0.0	0.337758488639	0.0	0.378884566042594	0.08536826467886903	6.732524873633	8.707865693742999	61.32587339156301	0.4740896358542089	0.4826376052788515
5279366	0.303125148837	0.0		0.0	0.0	1.0	0.0		0.1267389654519774	50.02465516148101	0.0	283.82458895296804	0.4597023369159818	0.0
5274302	0.0	0.0		0.00552681600675	0.0	0.0	0.0		0.010777142500680913	35.465008565340355	34.668274864000004	3072.5624175510634	0.13201277291703806	0.11635766579519585
5283192	0.220496799923	0.0502307317802		0.0749821068603	0.0	0.7402597402600001	0.0		0.04965966131215701	0.64863162342222	0.0	2.1651745765724	0.9577047413792428	0.007203539941269116
5280750	0.0133932177375	0.137769592664		61.33609588260001	0.0	0.0803328532565	0.0		0.010966677968791602	2.560035304063	0.0	134.9980133452	0.13711892646474402	0.0
5274338	0.0230663382375	110.582452371	255.27253652599998	14809.9316661	0.0	0.065884658616	0.0	0.07762249751583143	0.023066338237500005	142.82561784716077	278.02248980573074	15424.54344556178	0.1686911408111478	0.13381870041654656
5279638	0.030993114827999997	3.40584469074		187.87004354200002	0.0	0.15159780175	0.0		0.030993114828	6.801894454220999	0.0	196.695628640968	0.2824873342150377	0.0
5279348	0.321318647525	6.12463440798		56.69169353	0.0	0.647078439364	0.0		0.2620420465358603	9.32796263615489	0.0	64.99855296394352	0.6923391215524914	0.0
5292523	0.0676428334657	3.40436996837	3.40436996837	3.40436996837	0.0	1.0	0.0	1.0000000000001412	0.14421837715046998	5.531226435822201	5.5363625387807005	35.8985378837279	0.2672380952377764	0.2739461930337295
5275510	0.0	0.0	0.00208522345929	6.28739349845	0.0	0.0	0.0	0.011309065873289994	0.0	4.311301033222	5.16797896328592	264.9841466115892	0.06824185500451815	0.08959801782345386
5280890	0.0052405334671000005	0.0		2.15704739076	0.0	0.0	0.0		0.001754377230845808	0.746280174353	0.0	74.52144816846001	0.11276061565325995	0.0
5276500	0.153892274243	0.0843451756955	0.32805893023000005	4.27718303474	0.0	0.6670697299480001	0.0	0.6772179073454152	0.03883851692469093	0.2112336439459448	0.4451342133174449	9.959747424328443	0.5939441759541222	0.5809960795333922
5279780	0.022165486151499998	1.0196308626		97.4635146475	0.0	0.477142857143	0.0		0.01125756091571597	31.6764655289	0.0	773.06679903734	0.3065604165845812	0.0
5293347	0.194908172056	0.158524125218	0.156599072565	3.08173834979	0.0	0.7335932423649999	0.0	0.7256714233444803	0.1872260833187117	3.37959045778669	7.0531044701214896	21.810289498218694	0.6259308764557125	0.6563120463714336
5275768	0.0394004101025	0.0394199513903	0.5512949494	50.871916047700005	0.0	0.142448979592	0.0	0.1219316036195957	0.0394004101025	1.31501453672798	1.60722116401968	55.04211956452568	0.6469562885490437	0.6318342003125501
5279790	0.0	0.0		0.0	0.0	1.0	0.0		0.06362217307304223	10.3242191287037	0.0	230.6360946886	0.3737597313387232	0.0
5293547	0.97106282515	0.00377993800794	0.00377993800794	0.00377993800794	0.0	1.0	0.0	0.9999999999993792	0.6418234998181275	0.4380465349059001	0.43880649335190003	0.5285767694989	0.884011090572702	0.8990431447932834
5293743	0.0168928625523	0.0158890601015	0.0476671803044	16.944341063099998	0.0	0.0285343709468	0.0	0.08820046891451988	0.009383642296788458	3.0495797169745	4.546632920557401	53.765729378563	0.2690246516611162	0.3142365073695764
5274458	0.00763311788767	1.09320043276	1.4577316805	28.9326170358	0.0	0.0293470286134	0.0	0.04344143507927714	0.012579701984297049	28.59643513013	79.7203255348	844.8209487828	0.1658302583027775	0.19903982082881064
5276388	0.0	0.0	0.0	0.000252637953963	0.0	0.125	0.0	0.6079594381598236	0.007075890021606711	1.92532811987	1.77479954083	58.368886153353955	0.17899264603885445	0.1651517465285762
5293133	0.0553142168844	1.56793897855	1.08901186265	4.804460380280001	0.0	0.439915671117	0.0	0.24545901617797425	0.053449045187217735	2.628081840798	2.1107522864203	19.66874244358	0.2823509767905833	0.1925686090341857
5293091	0.47080635699900003	0.0401405227894	0.042438253061800005	0.464027225054	0.0	0.671826625387	0.0	0.7228846062207711	0.07068502267104654	1.0723433793024	1.4155574033899	26.601456196828998	0.28747409624718684	0.2872639543892189
5279656	0.30262344209	0.0185224573361	0.0108669587644	0.0760788096823	0.0	0.605263157895	0.0	0.6696291045250329	0.021591887104584144	0.5491975365851001	0.5002911295664001	17.6600630218823	0.21799092445918145	0.1903582091189008
5279688	0.00033071317831200004	26.603119808699997	0.06490040151399999	142.9658267	0.0	0.576463899943	0.0	0.543828389508372	0.006088799196760343	60.553537203655004	37.131262382705	547.3603986630001	0.38462565952077066	0.3455257807153109
5293653	0.41459428608099996	0.008706112086659999	0.0302052724292	0.18064301063700008	0.0	0.511111111111	0.0	0.5545525819554511	0.19492007147281007	2.33598125290866	2.3609855154232	6.853520494167	0.6841333053868817	0.6936210236241588
5293855	0.0718812957241	0.00503281946294	0.0156017403351	8.77037805726	0.0	0.185929648241	0.0	0.3108836570884981	0.017066567687984008	3.16558731914894	2.3774384161093005	22.7184152839157	0.3595244249156759	0.25834064695639425
5279302	0.07061522767560001	0.0739102024818		0.0739102024818	0.0	1.0	0.0		0.07617914977396115	1.9678152808868	0.0	212.63940464438184	0.31551285209833896	0.0
5279746	0.0066668034291	0.0046764212093	0.00039365279371900017	3.97332508754	0.0	0.272440464075	0.0	0.15046147465005302	0.015752326629810614	3.8577806949293	6.53005079105472	81.91769679686699	0.28681738235147924	0.22031152561305245
5293595	0.648312902583	0.0137620406749	0.015320007543799996	0.0340156099701	0.0	0.742148760331	0.0	0.7610865674898124	0.5518704863925198	19.01884391737489	20.376845356533803	73.77270954057009	0.6686003272348314	0.6932141942178074
5279762	0.0346182540753	5.6831552796	4.17389931744	92.5337072301	0.0	0.209001362255	0.0	0.18707271896642289	0.02856952560608785	5.6831552796	4.17389931744	92.5337072301	0.29022525736410004	0.2680071847520178
5279396	0.006206106123189999	2.26269225206		11.6666659228	0.0	0.186046511628	0.0		0.004529123683873263	18.073842767549	0.0	81.792769957193	0.3332494019889861	0.0
5293649	0.410417226785	4.3327835175699985	4.71148271167	9.643903661260001	0.0	0.821229050279	0.0	0.8797286764666011	0.25259269736614154	6.668764770478657	7.072468227093201	16.497424155427	0.7476372637263115	0.7798277300544395
5279692	0.007595788232090002	1.10805688522	1.05970888381	447.68998846	0.0	0.124386252046	0.0	0.12067751031357901	0.01807158285546651	61.18725221895001	37.843541149094	982.3367144680001	0.2633928571431336	0.2643295307417945
5279394	0.0129975891306	8.927765000439997		65.59670797689999	0.0	0.363517346716	0.0		0.0098366174049141	24.738915515928998	0.0	135.722812011293	0.39822345890385785	0.0
5279660	0.09945853406829999	0.0152497024101	0.0170437850466	0.0182398401375	0.0	0.23137254902	0.0	0.22495034253554794	0.08953393129794364	11.194200881089921	11.827248260063698	24.172572704014502	0.5001053592752644	0.4970946345928623
5278960	0.441030690969	0.227717175963		0.229185098549	0.0	0.994989684645	0.0		0.13200625727232804	11.694429295455999	0.0	66.492499141789	0.6786632390746365	0.0
5279720	0.472949358175	0.00112252903637		0.00112252903637	0.0	1.0	0.0		0.09384694185481388	1.0929603182151002	0.0	12.498404926558099	0.7195352214959276	0.0
5278656	0.060047576915600004	5.0894644852800015	4.2617183278500015	70.2230083915	0.0	0.185084376701	0.0	0.18014222036725408	0.026607269433021084	32.243165476160755	22.74995327973075	614.6117794617808	0.23478728135230265	0.16994825222588011
5276416	0.00199736223667	0.00212704719161	0.776856931858	191.482560207	0.0	0.236591179976	0.0	0.253701151432333	0.020818943214011527	2.064675647540561	3.3047789848088067	625.75611409278	0.15912698412713927	0.18349209134956884
5280876	0.39326307034	0.197091760463		0.526180754998	0.0	0.48544973545	0.0		0.35670846406534634	46.82569715846302	0.0	275.525184608998	0.40942891136188375	0.0
5276540	0.0326956391288	0.0191180252295	0.0116262759839	0.0509579595237	0.0	0.5714285714289999	0.0	0.4718104857669458	0.0533966058208216	9.621579206450699	11.4173371245559	280.95904565762373	0.1172619047622356	0.13060310167542866
5279748	0.159221200394	0.00759148140787	0.007229982293210002	0.00903747786651	0.0	0.379310344828	0.0	0.3612861481982073	0.02077276983539663	3.44318975649787	5.61611231678321	84.40738507556651	0.258198931320083	0.29845651286021674
5279740	0.0162078297649	3.63730854791	5.17495553436	309.38436695400003	0.0	0.14635297078	0.0	0.17874986460300973	0.01607291640272018	7.49041282163	11.364456609184	386.98858259989004	0.17490923031827252	0.1895505935317172
5279708	0.6614719605330001	0.147946709767		0.34520898945600004	0.0	0.728187919463	0.0		0.6670582318113334	1.2409070279821002	0.0	12.8436139160141	0.7204779105306245	0.0
5276376	0.0	0.0223591633185	0.922306261593	9.63890282441	0.0	0.553158705701	0.0	0.5729917681275171	0.013132697590887804	6.5547684619045	11.075189722774	145.66402601541	0.2599732773432442	0.28383541241519417
5294203	0.0383003887896	0.0	0.00541672503459	3.37755265899	0.0	0.0153396639883	0.0	0.03398169119112055	0.0383003887896	2.05179488835612	3.54668140192519	44.66669242515	0.2161648177494367	0.2564362628968572
5275784	0.192562627696	15.5275131938	6.37213226671	74.6767953799	0.0	0.440248027057	0.0	0.3864348500351624	0.2312352905059939	16.798992311152002	7.423943013344001	78.84288342874001	0.7045987799151342	0.6748660118474217
5276370	0.00171484355036	0.0	0.00292240461567	15.769245509000001	0.0	0.461711711712	0.0	0.4922838142931562	0.016193663665188308	6.427348908592758	10.076108513035368	202.9255576004	0.2399712322200365	0.26262101410400546
5280900	0.06003222697930001	0.0		5.475656836259999	0.0	0.0304302203568	0.0		0.06003222697930001	1.02170891655	0.0	55.27821350076	0.0981447738945012	0.0
5293825	0.510534908277	0.432695227104	0.43345518555	0.523225461697	0.0	0.8710837185410001	0.0	0.8877911480909991	0.3870397671949995	12.33517413067966	12.55496582193836	59.791405005811654	0.6766940139774953	0.6986211349652192
5276422	0.00814207560207	2.34278565556	5.61494290007	25.803711401799998	0.0	0.0749659245797	0.0	0.10416518702242768	0.043899096968219926	5.5102332180575	14.580893640442802	159.36874250399998	0.11455558246561802	0.15896434541943702
5279786	0.0016472116610499999	0.054813698036		51.4961142815	0.0	0.717842323651	0.0		0.02533463423652266	22.992390713686	0.0	681.0093613025	0.3106639312063278	0.0
5280692	0.0186128488336	0.0618784377002		0.7374637053	0.0	0.14096185738	0.0		0.02755132572722437	0.71051006112242	0.0	2.9026382818724	0.8435689455387927	0.006196880709615518
5293741	0.46289290388899995	0.0907785370364	0.0868394573845	2.72837245157	0.0	0.571699305117	0.0	0.5498381499139067	0.6112779897786627	6.9526226090694	4.9676851658475005	87.07259060553301	0.4923371647512607	0.4763916319883078
5276480	0.000791119039398	0.0195231913185	1.54752718231	76.5410803463	0.0	0.259377494014	0.0	0.30780168045460105	0.001657989020016039	1.4790568881539998	3.3385559997300005	105.47971586384001	0.3196470588237139	0.3229535647308777
5275766	0.281252231325	0.0341981868114	0.0341981868114	2.44854702361	0.0	0.5311111111110001	0.0	0.5252579379730896	0.281252231325	1.30979277214908	1.09012440143108	6.6187505404356815	0.8638695492851443	0.8519335121199852
5293295	0.043553139098500004	0.885386961163	0.5134108737399999	30.5353304065	0.0	0.18816190338	0.0	0.18147417450364486	0.0381065238417015	1.213101846122	0.8068589631	38.38184900756001	0.3290073055435534	0.3008869781892662
5276448	0.0707612528028	0.0006014425307509999	0.000902163796127	2.69523893856	0.0	0.180327868852	0.0	0.20643441098150506	0.035375750733907474	1.6361129931606913	22.350117545221387	208.18938026073002	0.2119558908877912	0.2573622215797257
5293849	0.175805181149	2.75185848353	1.73146931238	21.3998047122	0.0	0.239272227944	0.0	0.2271887815325909	0.10492950012471593	3.06993259918393	2.0392013364940302	24.41090134442853	0.4181628392486316	0.4015038919336071
5278962	0.013564276233399999	0.00349068005744		0.0462700782082	0.0	0.108925869894	0.0		0.23100430913284564	11.47020279955044	0.0	66.3095841214482	0.5543263871023663	0.0
5278912	0.8683104659990001	0.0022450580727300003		0.0022450580727300003	0.0	1.0	0.0		0.096693929362821	1.09183778917873	0.0	12.49728239752173	0.7170281359905425	0.0
5279698	1.0	0.00430536901695	0.00430536901695	0.00430536901695	0.0	1.0	0.0	0.9999999999965942	0.2266632767973601	94.41724953351697	151.29105840901698	3418.1542041290168	0.19205158165883365	0.1975890442227693
5279874	0.604047801332	0.00285978941247	0.00285978941247	0.00285978941247	0.0	1.0	0.0	0.999999999997119	0.06959257394080078	3.4384580645024707	5.6117421239024665	84.40120738711248	0.2569659442723562	0.2983387710809445
5279782	0.00672408225136	2.89292835325		128.788452917	0.0	0.180697867627	0.0		0.012357785729894773	33.54976301955	0.0	804.39173730684	0.2649732532573411	0.0
5293583	0.0608534245101	0.0015713697939600002	0.0015713697939600002	0.0015713697939600002	0.0	1.0	0.0	0.9999999999952972	0.12410556139623899	11.902478903575664	12.12151063638836	59.26817954411466	0.5950377562029227	0.6191574854385969
5293537	0.7796407269660001	0.0163976434924	0.0166283446233	0.0274712977771	0.0	0.7961783439489999	0.0	0.8008642252072169	0.14915790252759042	0.18426351474393	0.1869165777498301	0.23363355676363	0.7739038563128763	0.7858562656746051
5279756	0.011482344579999998	0.0	0.0	0.0	0.0	0.5751171551959999	0.0	0.5518839124895651	0.019567367200604337	3.85310427372	6.529657138261	77.944371709327	0.4213722915295654	0.3965610695698613
5276434	0.0209200623158	0.000272502744338	0.000817508233013	0.939420969604	0.0	0.0410490307868	0.0	0.04568491289068966	0.036630603916597414	2.2612029435479086	10.137428232495092	74.43747438277528	0.145707311896555	0.1639776766040213
5274288	0.0	0.0		5.166593417530001	0.0	0.0	0.0		0.0	35.465008565340355	34.668274864000004	3273.800102681593	0.12583207542479494	0.11090992375257104
5275858	0.0174324139812	0.0	0.779985668429	16.3083248891	0.0	0.0	0.0	0.013708981344498685	0.0174324139812	6.73063946103278	5.175048748064532	101.53958683119	0.3464763011537292	0.3259030952513961
5274502	0.0109727766945	0.0		196.071091713	0.0	0.0	0.0		0.010862584962367071	35.465008565340355	34.668274864000004	3268.633509264064	0.12589126559693478	0.11096209469115538
5275774	0.782054164106	0.00411546798568	0.00411546798568	0.00411546798568	0.0	1.0	0.0	1.0000000000101257	0.3145004924224938	1.27559458533768	1.05592621461968	4.17020351682568	0.8937699680507923	0.8812873476563478
5293719	0.999140349713	0.005252106202529999	0.005252106202529999	0.005252106202529999	0.0	1.0	0.0	1.000000000004933	0.8862030168499366	0.3180741156539301	0.3077320241140301	3.0110966322285297	0.6957911561001989	0.6720312849001283
5279870	0.5456109626519999	0.0006575969719049999	0.0006704910301779999	0.0006704910301779999	0.0	0.981818181818	0.0	1.0000000000066205	0.22726084857331466	35.425455615171906	23.70242695903018	513.6392949080301	0.5070063694268808	0.5267036064457076
5279806	0.013781778426900001	0.0763397215633		110.728165866	0.0	0.278334058917	0.0		0.011006462127667177	13.506991276595302	0.0	310.12243517557005	0.2476240148351609	0.0
5279606	0.5073235378600001	0.0		0.0	0.0	1.0	0.0		0.2285873884056269	1.0537515344039998	0.0	1.174045666674	0.8951915852742031	0.0
5275892	0.010147592470299999	0.0	0.0142818038003	23.6502383746	0.0	0.0	0.0	0.04326492720782498	0.010147592470299999	6.73063946103278	4.40934488343583	108.88150031669001	0.3680776014108444	0.3495372003584066
5279804	0.055061250490800004	11.493947739000001		23.7604410342	0.0	0.632669322709	0.0		0.02742434389341149	34.486338452686	0.0	704.7698023367	0.3273878496939894	0.0
5293203	0.0799092317005	0.122647392163	0.0914814965581	0.201594065475	0.0	0.535003211304	0.0	0.447109502366424	0.10916249579355478	8.787591472273	6.8986754017581005	16.245509386174998	0.6240054557852653	0.5800472160307484
5279670	0.0890110790171	5.69991564843	5.58736151699	32.9701276256	0.0	0.494553072626	0.0	0.5498028992898011	0.13037280221659442	41.125371263601906	29.289788476020174	546.6094225336301	0.5049456898545603	0.530525906810018
5276538	0.026618811931	0.0477599014412	0.714799487672	138.744869682	0.0	0.06826666666669999	0.0	0.0534055109793108	0.041416402775589854	9.602461181221203	11.405710848572	280.9080876981	0.1147246608143766	0.1286969151721241
5279876	0.0808740568046	1.72104931763	1.28574981681	3.4949210416900005	0.0	0.574036511156	0.0	0.4540616880326294	0.014172227366014532	7.404204597230001	5.459649134249999	96.02862827179001	0.2181929618468174	0.1937955118439774
5293327	0.2624354592	0.0586161110696	0.026776838873	4.26549153739	0.0	0.560224089636	0.0	0.546612172624529	0.18353032384178555	3.4296480193164003	7.0713227594546	26.0672224860688	0.6170135746603834	0.6449315352894847
5276456	0.0037017693989000004	0.00195468822494	0.00421009771526	7.12317365547	0.0	0.259717314488	0.0	0.2966770704392564	0.010389878978448	1.6355115506299402	22.34921538142526	205.49414132216998	0.2121814355854979	0.25772539628705465
165910747	0.0900035158714	0.528481192046	1.0400682455	8.234823125950001	0.0	0.307913669065	0.0	0.2983645217698918	0.05403868746033525	14.023057608986	14.70425005164	21.952967594889998	0.7565626930205263	0.7611665187740235
5292481	0.0168744285594	0.00712360042235	0.00770750209631	0.0184512928972	0.0	0.386075949367	0.0	0.4159110426635139	0.02683022104571768	1.03508745710135	1.07638905135531	50.547784488137204	0.30997555581415565	0.3256641664321901
5280740	0.0037166134412	0.00656208372675		8.87202750111	0.0	0.00232558139535	0.0		0.0037166134412	9.371158803059748	0.0	89.63795530911	0.226072410084744	0.0
5278928	0.0830637848415	3.3278329234500004		16.298302360999998	0.0	0.21647429171	0.0		0.0900128828327844	4.439809284715301	0.0	28.815723330608296	0.42705602633638734	0.0
942010019	0.30583479096099997	1.46594754758		8.8166316924	0.0	0.8080744560430001	0.0		0.1456937639389092	232.11937103632096	36.370913006100004	2712.355883505701	0.3425621547622519	0.07332670044752003
5280888	0.07229029974439999	230.342575337	36.370913006100004	2703.20074036	0.0	0.288736603902	0.0	0.08090665510931005	0.09035157251247572	237.18878530929797	61.28298420347	2821.21366324777	0.2894763414580205	0.08694039890398303
5276412	0.0043650845466499996	0.00932382731116	0.0174066066393	191.13996069799998	0.0	0.197575757576	0.0	0.21864639160546853	0.01895590597481184	2.07396652314927	3.3219878812334	807.02797995575	0.13786970555324213	0.15491100433725885
5280880	0.0	0.00582385296002		1.44738469925	0.0	0.488636363636	0.0		0.04660795028180098	230.940976228642	36.370913006100004	2705.2909328297123	0.31362851149544146	0.07821328731051899
5279802	0.0125028154886	20.0446486624		500.724794104	0.0	0.341596464577	0.0		0.010110087126316834	33.475300217432	0.0	700.11906341357	0.2938785366443677	0.0
5276360	0.103903893629	13.817689951099998	20.0548597574	229.413052432	0.0	0.191221106701	0.0	0.2064418427464269	0.08605074034410873	18.557961032820085	25.7034306322156	368.997795755801	0.19517409896164248	0.2109454924599215
5274498	0.0637854484	51.7509991369	36.886150029899994	966.257430937	0.0	0.277130391561	0.0	0.2478491223288207	0.06226428579522888	87.0659890532	131.086382732	1863.846025195	0.3585942535363809	0.3515047274045089
5280756	0.00131025047746	0.0		2.37695964298	0.0	0.0	0.0		0.00131025047746	0.746280174353	0.0	76.89840781144002	0.0972601449957174	0.0
5276386	4.61056972958e-06	0.0	0.0159785939031	34.5342720414	0.0	0.24317617866	0.0	0.31028397075291464	0.017098445472691175	1.92532811987	1.7907781347331002	92.90315819475396	0.182391590013404	0.1728374608994577
5279378	0.0100585806179	0.4179951094560001		1.9789189026900005	0.0	0.208864265928	0.0		0.025604298635546814	13.6959127974786	0.0	110.918556407644	0.23688372412869305	0.0
5275220	0.0261284396453	6.35804672765	6.70451083794	36.8321495107	0.0	0.0338628762542	0.0	0.0799997238582521	0.022065766828774296	9.721782292618	12.973370374549999	275.0414484644	0.10276229851998664	0.1178001934298005
942010022	0.532129292729	0.268625217781		0.27299310750100003	0.0	0.994391025641	0.0		0.15340921444503566	230.922048706522	36.370913006100004	2703.812244920802	0.31233950394425564	0.07844478541249518
5274320	0.0	0.000463041040348		0.00786180552677	0.0	0.0588235294118	0.0		0.009241012027337452	35.465008565340355	34.668274864000004	3065.7687106155267	0.13310124594260786	0.11731705917613727
5279648	0.0	0.0	5.04916579303e-05	0.000222163294893	0.0	0.099173553719	0.0	0.7270331779529651	0.0	0.5491975365851001	0.5307032647988303	17.967721322051197	0.2549289001853075	0.30870750116656936
5293729	0.09277237244349999	0.0199341303596	0.052761297367400005	2.26319965853	0.0	0.13392141138699998	0.0	0.18644924700769985	0.03805576887991425	5.983438670866001	4.0313283946519	88.34667219549999	0.434437234280819	0.4277968996964861
5293633	0.5158540906669999	2.1456746855400004	2.17466633111	13.493017540799999	0.0	0.641118779513	0.0	0.6999295154530821	0.5819257082327166	6.478458203109999	6.8861490427800005	23.136921202059998	0.7490538573504997	0.8076781538654049
5279664	0.207526551561	0.0693711952772	0.09000314559669999	3.46665739197	0.0	0.368544178514	0.0	0.35462914761296904	0.20096644182584725	14.12472229171982	14.828041753557102	27.172170142417002	0.6530663204156933	0.6520789278296315
5292525	0.018328876708500003	2.04473791461	3.0262516951	24.812156069	0.0	0.307443365696	0.0	0.2739226867988743	0.01189331453059622	6.9422400625691	8.670325950659299	93.98062850369	0.1920269511512045	0.1292920401187652
5280748	0.00824893487888	3.21505775099		39.1560845434	0.0	0.0823779193206	0.0		0.00824893487888	4.6932175142600006	0.0	59.52570368439999	0.12990347582152484	0.0
5279690	0.00230961337054	0.17351849447	0.265797737753	115.64421891399999	0.0	0.213877239802	0.0	0.2133136285883876	0.012121906054303218	60.252713828199994	37.049630003037	650.2909449220001	0.3302576891108844	0.3334625746278834
5292519	0.15411930669399998	0.179702996218	0.188061275112	1.00546714954	0.0	0.513911620295	0.0	0.5383144064728387	0.15095986181680066	5.700386904908	5.713610965552	36.88629899411	0.3412666931111117	0.3536978601715977
5280894	0.036733440832599995	0.0531426582602		2.36380038067	0.0	0.136286201022	0.0		0.036733440832599995	0.7636527193826199	0.0	5.2664386625424005	0.758873929008528	0.005454822574865557
5274468	0.00698755168863	24.4813641204	67.6052149073	734.8989446989999	0.0	0.16677817069700002	0.0	0.19485468684384866	0.013100364282373048	58.78984196316	121.32199397033001	3180.9513607440003	0.18048170159553031	0.22315742375641384
5279712	0.8204344752760001	0.0		0.0	0.0	1.0	0.0		0.7762343100009954	1.0929603182151002	0.0	12.498404926558099	0.7201449275361539	0.0
5293759	0.43176654619099997	0.989118068563	0.989118068563	0.989118068563	0.0	1.0	0.0	0.9999999999989808	0.2517459095866005	4.687952285323	5.198018022053001	25.493603144663002	0.5452244571732409	0.5367738320922817
5276436	0.08611407828960002	0.00112605210961	0.000685423023242	0.00391670298995	0.0	0.577777777778	0.0	0.5178961216802133	0.03310784113912019	2.2619202415410107	10.137296147285321	73.49365878245892	0.15994404290059214	0.17861130620600313
5293319	0.17361859501600002	8.66494408011	6.8071939052	16.0439153207	0.0	0.672765657987	0.0	0.6528776242557144	0.11943437453409868	12.094592099426405	13.878516664654601	42.1111378067688	0.6359507589336288	0.6476305653889259
5279700	1.0	0.006619859719649999	0.006619859719649999	0.006619859719649999	0.0	1.0	0.0	0.9999999999911302	0.2178212984795024	94.4238693932366	151.2976782687366	3418.1608239887364	0.19229037070357646	0.1978261966712048
5279758	0.0239683726115	3.43559827509	5.60888233449	84.39834759770001	0.0	0.255739508828	0.0	0.2971806247020002	0.02270577498796333	3.43559827509	5.60888233449	84.39834759770001	0.3683119575073284	0.38695701675382255
5279704	0.980858344751	0.0553111066256	0.055441019139800006	0.055441019139800006	0.0	0.995	0.0	0.9999999999986176	0.12946146608470302	94.4682552711256	151.3421940591398	3418.20533977914	0.1944729048824816	0.2000216505252852
5275524	0.020407014869799997	0.0	0.0534134961345	23.027159516599998	0.0	0.0	0.0	0.03057197434608272	0.020407014869799997	4.311301033222	5.2017623075905	280.76613247439997	0.06801118798774904	0.0887129872807828
5278958	0.232361931415	0.556342055643		17.6316926446	0.0	0.542483660131	0.0		0.2372422268337499	5.517914717073442	0.0	37.08550328144821	0.5860402382826643	0.0
5279814	0.135641929859	46.62860539800001		274.999003854	0.0	0.407977164797	0.0		0.16951285421398832	47.96885620889904	0.0	303.45140467300223	0.4615679120776256	0.0006022012085217433
1157297	0.026624730769599998	0.54367645795	0.469250604045	36.0957231363	0.0	0.08136015666730001	0.0	0.062258105570778426	0.01347294969331504	1.1511127355920001	0.990022787752	59.1189590271	0.09542111192121967	0.08423134355289898
5274500	0.004452864768439999	11.638462827	0.0644938722253	28.4774647242	0.0	0.155963302752	0.0	0.07299732650776652	0.024481444526928724	98.70445188020001	131.1508766042253	1892.3234899192005	0.3556409827845176	0.34744558560972433
5293731	0.7224965461059999	0.22204347241500005	0.215640460527	0.277472074456	0.0	0.7803030303030001	0.0	0.7544562747164186	0.7601096301937752	6.1855480129214016	4.1942075578115	86.36094461142599	0.5471794348671128	0.5288746435447993
5293833	0.330175280936	11.864143502200001	12.081442671500001	59.2094159768	0.0	0.505605058925	0.0	0.5341585431665765	0.4080331578236012	21.150756562239998	22.536191680100004	87.23171147139999	0.655055799796957	0.6906693281971952
5280754	0.0138468156543	1.02170891655		49.802556664499996	0.0	0.103947486737	0.0		0.017492227033521882	3.282287286619	0.0	67.01341828961	0.13210602062859786	0.0
5278904	0.807933474876	0.0901496000588		0.109875828028	0.0	0.8666666666670001	0.0		0.09156251896339536	1.2646533054206002	0.0	12.716947705190101	0.7215479080393359	0.0
5293097	0.0962580246222	0.638741023904	0.32855696413	4.37136333058	0.0	0.282352941176	0.0	0.22896041380122795	0.02607630364198092	3.2891909637550003	2.4583966950755003	24.066450424155704	0.30374697250299953	0.21655271323235764
5279800	0.0	0.0		1.59110445384	0.0	0.732727272727	0.0		0.012763101080468742	13.430651555032	0.0	199.39426930957	0.2272069464542681	0.0
5279634	0.630950878538	0.419063653761		0.419063653761	0.0	1.0	0.0		0.08438004605889092	1.2177189934161001	0.0	99.52980753981113	0.357113014414052	0.0
5278710	0.0820919122901	35.4645455243	34.668274864000004	3065.76084881	0.0	0.133134312724	0.0	0.11736928611216248	0.07808259794043322	36.25936581450792	36.005779640027704	3079.3950976150873	0.20219819250946866	0.1883109061545736
5280878	0.29702592847	0.746217808977		27.808137085300004	0.0	0.699095022624	0.0		0.14107070413500966	231.68137018465904	36.370913006100004	2731.6516852157624	0.31866179307497344	0.07723016161562182
5279654	0.014911124458700001	0.0	0.0303616435745	0.307436136874	0.0	0.390678761339	0.0	0.7089296739637521	0.012483548099869731	0.5491975365851001	0.5306527731409001	17.9674991587563	0.2562344139649157	0.3052011692954725
5276368	0.00784503564776	0.279202934122	1.72317326503	37.5296533311	0.0	0.280235988201	0.0	0.32289678919790155	0.05442481754540355	6.706551842714758	11.79928177806537	240.4552109315	0.24477443873616955	0.2698113469060432
5280704	0.00189196890105	0.0867885205662		15.1990108434	0.0	0.038123167155400005	0.0		0.0023791808466831505	2.3494807726262	0.0	26.8656767662	0.14166300044000474	0.0
5279734	0.030545594107599997	0.0	0.298426389694	0.89933277879	0.0	0.599226804124	0.0	0.7384977599687971	0.013853524855346348	3.85310427372	6.189501074823999	77.60421564589002	0.2472509960155074	0.2169121532791589
5276454	0.0253151092895	0.765861910975	0.7654553393440001	13.659202129	0.0	0.204892966361	0.0	0.2265279520819215	0.01565976005934	2.3994187733800003	23.110460623054003	212.0301697957	0.20851654709537548	0.25281336480356664
5279176	0.113585037536	0.0		0.0	0.0	0.772301425662	0.0		0.1125034952137568	1.0537515344039998	0.0	1.174045666674	0.8564082786990702	0.0
5280904	0.0498575608024	0.0163000785687		0.0163000785687	0.0	1.0	0.0		0.04652107452823417	8.944065079008697	0.0	65.6130080554687	0.3646264430406073	0.0
5276444	0.0961662610442	0.0	0.0	0.0	0.0	0.96	0.0	0.9795083180241622	0.010983771357177869	1.6355115506299402	22.34921538142526	205.49414132216998	0.21436064809399105	0.25982873852314603
5294199	0.0100314372591	0.0		30.095331097	0.0	0.0166112956811	0.0		0.0100314372591	2.0604616484114997	3.5701538770751	137.9531679475	0.1614474599859643	0.1916417436515428
5279668	0.456253413403	26.189867831799997	27.6206597427	27.6206597427	0.0	0.958622530699	0.0	0.9999999999998058	0.13856360506947374	67.31523909540189	56.91044821872018	574.2300822763301	0.5411669643617689	0.5680415069249801
5279312	0.21627522772399999	1.35349554371		10.8793235319	0.0	0.5560371517029999	0.0		0.05118809545010671	3.3213108245968	0.0	223.51872817628185	0.3436774941996679	0.0
5280902	0.64195570462	0.0		0.0	0.0	1.0	0.0		0.4994448879523602	230.342575337	36.370913006100004	2703.20074036	0.2888125173432127	0.08089801990800481
5279784	0.105772061973	0.000318698039337		0.000318698039337	0.0	1.0	0.0		0.15697791776932035	10.324537826743038	0.0	230.63641338663933	0.3815948145914947	0.0
5279116	0.0330402289651	3.2652631202900007		194.43575279799998	0.0	0.118261865559	0.0		0.035143023301430154	14.323669132090002	0.0	1003.8147888869998	0.15048140978894095	0.0
5293673	0.324878344322	0.8746241645999999	0.874791841496	3.30265755828	0.0	0.510174418605	0.0	0.5150080204000759	0.4857216348478882	1.61830626973	2.202453713014	6.35969643886	0.8071895424838855	0.8222579823585601
5275802	0.0416796715822	6.72498409834	4.39098636113	84.1821601704	0.0	0.0902891434806	0.0	0.08595904941267403	0.03209909304459272	6.73063946103278	4.3950630796355314	85.23126194209	0.42854209445574704	0.39984886740573
5293247	0.0902128504009	0.8879857394640001	0.0940798818192	1.94896284729	0.0	0.6985605419140001	0.0	0.4822546328932639	0.07721487056802348	15.593535249468	11.211793735654199	65.35480878806	0.34533618984836456	0.2871487165163239
5279662	0.849670418028	0.0296023635019	0.0296023635019	0.0296023635019	0.0	1.0	0.0	1.0000000000118374	0.1994359607058068	11.20855354218172	11.839806838519001	24.18393522737891	0.508486613166809	0.5055588364003399
5280718	0.00902443837262	0.436831718893		15.1692198311	0.0	0.135085574572	0.0		0.006010221890170714	9.364596719332997	0.0	80.76592780799999	0.3034249879400579	0.0
5276374	0.0112787370719	0.000217405962758	0.0301143936667	58.817110491899996	0.0	0.274876305662	0.0	0.28652286844094604	0.04487102730887727	6.532626704548759	10.182997854847699	194.8422336829	0.2498700527215356	0.2706264193331705
5293331	0.0508730005722	0.169190759741	0.136849016795	4.76478025127	0.0	0.437714642523	0.0	0.35376527813029424	0.030423308442644632	3.5402226679878	7.1813949373766	26.566511199948806	0.5508302472822526	0.5377154907058629
5279764	0.288623689439	0.019524732255400003	0.0183866634034	0.0200937666814	0.0	0.8105263157889999	0.0	0.8464781350424049	0.012174434849376454	5.702680011855401	4.192285980843399	92.5538009967814	0.2104946821020152	0.18870973034769706
5292665	0.0123946709513	0.0206117102935	0.0372958963708	39.181871826700004	0.0	0.051752921535900005	0.0	0.06760504556520461	0.011154885747465038	6.144652536429597	8.218943076148099	107.44879298619	0.12016642192857704	0.10133414744689867
5276390	0.0	0.00103937555104	5.39218100696	31.2497205865	0.0	0.106463878327	0.0	0.2003057745846939	0.00709973463836023	1.9263674954210401	7.166980547789999	89.61860673985396	0.171835917959233	0.16862054694581946
5279652	0.0222625131896	0.0	0.0	1.24467227658	0.0	0.296137339056	0.0	0.5122465550050734	0.0222483670334827	0.5491975365851001	0.5002911295664001	18.9047352984623	0.2460353679405611	0.30587444323013363
5279798	0.048860317197	0.0700813069125		6.9610666915	0.0	0.238095238095	0.0		0.03620884945845634	10.394300435616199	0.0	237.59716138009998	0.34579495879781513	0.0
5280688	0.046515307049799996	1.4781597632700003		20.369619140999998	0.0	0.190363007779	0.0		0.02509043270656464	10.422224842278695	0.0	85.9826271964687	0.2771450265756199	0.0
5279794	0.00733601972389	7.3567763676		26.0437161619	0.0	0.659493670886	0.0		0.0014322189775809598	30.349167081286	0.0	707.0530774644002	0.3222920798348329	0.0
5275740	0.57642126827	2.39983954067	1.58237771853	16.0779650421	0.0	0.903390339034	0.0	0.8792349638443833	0.2187512486219116	2.40549490336278	1.58645443703553	17.127066813789998	0.7286063569681533	0.6920263875707746
5274464	0.00215658723779	3.02187057697	10.657378947	80.989387048	0.0	0.267981438515	0.0	0.3474560949942812	0.029418191359575886	35.684171599029995	87.58482203393	1222.1538447419998	0.18311024214185165	0.2241063884216304
5274504	0.0	0.0		6.788180119530001	0.0	0.0	0.0		0.0093121933614855	35.465008565340355	34.668274864000004	3072.5568907350566	0.13206420112173772	0.11640299524114762
942010023	0.629273760494	0.310848151741	0.0	0.338511453301	0.0	0.981216015818	0.0	0.013217765824019258	0.4991477427966728	230.653423488741	36.370913006100004	2703.5392518133012	0.3034466186775054	0.07946758274415823
5280870	0.568317471002	0.00145596324001		0.00145596324001	0.0	1.0	0.0		0.13584949001962102	1.34025081089901	0.0	28.452400819002108	0.9021806853580824	0.005553383231981507
5274462	0.0559271068374	0.00121718467562	0.006526513258	8.02704284899	0.0	0.271604938272	0.0	0.34696942573080897	0.02353062287550715	32.663518206735624	76.933969600188	1149.19150054299	0.1718643490118053	0.20768247208836835
5279864	0.0855616085113	0.0		2.59261431172	0.0	0.0	0.0		0.08556160851130001	13.6959127974786	0.0	113.51117071936399	0.2294983678638054	0.0
5274450	0.108783967611	0.21046388839	0.213779437501	0.302884819859	0.0	0.200716845878	0.0	0.2346411098023725	0.011221083830449384	27.714090883231982	78.47840121766158	816.1993082353117	0.18431966820884968	0.22013744119747566
942010018	0.9858516110369999	0.0		0.0	0.0	1.0	0.0		0.3824423318236165	230.653423488741	36.370913006100004	2703.5392518133012	0.30391931678138673	0.07941365410539132
5293211	0.0726312294266	0.128636464069	0.0965600193013	10.1184131975	0.0	0.232308151687	0.0	0.1738815702789609	0.042126264816366665	15.552980953796002	11.1715047381605	70.70844173429	0.29042501221285993	0.2388907357641276
5293763	0.376156673602	3.69883421676	4.2088999534900005	24.5044850761	0.0	0.5366449511399999	0.0	0.528034901943119	0.3771863488770594	3.69883421676	4.2088999534900005	24.5044850761	0.7191972363875242	0.7006538980336771
5293551	0.6107616275100001	0.162940719976	0.16536308185100002	0.201237107711	0.0	0.740219092332	0.0	0.7561962917444848	0.22439997692196287	0.6005610983555301	0.60374341867653	0.72938772068353	0.8269516176905976	0.8426679210990216
5279380	0.00949667682829	0.23406084039		18.8315027531	0.0	0.107167352538	0.0		0.00949667682829	13.453395796890002	0.0	127.6172175951	0.19686971696597488	0.0
5293587	0.42475139751400004	0.0230019909068	0.0231765875506	0.0231765875506	0.0	0.997821350763	0.0	1.0000000000010314	0.24235443781273625	11.900907533781702	12.1199392665944	59.26660817432071	0.5868368919217579	0.6114450682386814
5279172	1.0	0.0		0.0	0.0	1.0	0.0		0.21413109669386649	1.0537515344039998	0.0	1.174045666674	0.8953095684802734	0.0
5278936	1.0	0.0015480394358699998	0.0015480394358699998	0.0015480394358699998	0.0	1.0	0.0	0.9999999999934032	1.0	2.8666970332258703	3.3334508519558703	142.0480976344359	0.2507308577474504	0.2575781590793301
5293703	0.6308581670210001	0.232229496552	0.22490743724800005	1.95428444631	0.0	0.831785003318	0.0	0.8219806116759792	0.26112882546895383	0.965725577545	1.543302332045	3.334510955036	0.8305379746836709	0.8330476607267934
5293549	0.565094928413	0.0011452132675899998	0.0011452132675899998	0.0011452132675899998	0.0	1.0	0.0	1.0000000000028593	0.6100926473381859	0.43762037837953	0.43838033682553	0.5281506129725301	0.8799617407935567	0.8955185869599006
5293669	0.24780856707899998	1.22042147967	1.23108096425	1.41593547894	0.0	0.353205849269	0.0	0.4248271736020542	0.27380752314273593	2.327275140822	2.330780242994	6.672877483530001	0.6909170115445074	0.6990735000999521
5280720	0.00297359685191	0.0		7.300759006639999	0.0	0.0	0.0		0.00297359685191	2.3494807726262	0.0	34.166435772839996	0.11370056497179762	0.0
5279646	0.0098587270236	0.0	0.00767569523487	0.443844228586	0.0	0.0387096774194	0.0	0.332409317955348	0.01085911492746	0.5491975365851001	0.53832846837577	18.4113433873423	0.2472768331560541	0.306321589869936
5276496	0.534164911306	0.0	0.0	0.0	0.0	1.0	0.0	1.0000000000019336	0.08133268986256635	0.1268884682504448	0.11707528308744485	5.682564389588445	0.5858293480994031	0.5661391419916493
5276366	0.0171951586225	7.1779112114	12.8083600217	89.3976570387	0.0	0.184140831905	0.0	0.1958580466681908	0.033074369079975435	13.605260119992757	22.88446853473537	292.3232146391	0.22104262398984487	0.2399858539090816
5276414	0.008835278272180001	0.00025288091274000004	0.010568462719700002	287.772118132	0.0	0.136878814298	0.0	0.1598454156874549	0.023431783528823708	2.06489557675085	3.3151497373138	903.66013738975	0.13461910597970553	0.15188436919066794
5292477	0.021056104548999997	0.766317228423	15.211864473699999	232.233757955	0.0	0.095045953822	0.0	0.14685102444786807	0.021056104548999997	1.8014046855243502	16.288253525055307	282.78154244313714	0.17907527077451704	0.21676017629947952
5293937	0.760035704803	0.057374096461	0.057374096461	0.057374096461	0.0	1.0	0.0	0.9999126665338024	0.3305908872769143	3.2672739168492897	6.93777571842769	21.947994534538992	0.55067300079149	0.5824262970172118
5279226	0.142106976846	0.169131493662		0.183525663335	0.0	0.975221238938	0.0		0.07340605729322627	11.087718474662001	0.0	11.201329599635002	0.9638689048764691	0.0
24716078	0.804507665864	0.0	0.0	0.000628780326224	0.0	0.915254237288	0.0	0.8766651416509035	0.2374572403176758	9.22397383859975	18.15509017815609	332.43464723555365	0.3801644069604687	0.4499033592679796
5275522	0.004566922992479999	0.0	0.00999127631076	0.887323075222	0.0	0.0	0.0	0.08347080930420876	0.011444943551750941	4.311301033222	5.15834008776676	258.626296033022	0.08674427337603816	0.10643575588536464
5280760	0.010510101696699999	0.738349068502		80.5899633202	0.0	0.0183321351546	0.0		0.010510101696699999	4.403549930562	0.0	140.82521804549998	0.10530184241449286	0.0
5293949	0.169345525873	3.10113398044	6.78170125968	18.6086187963	0.0	0.476512335248	0.0	0.5428865737942515	0.15587419529018814	13.092894812248291	14.752853996926687	126.32038063107798	0.504556259904721	0.5055618081203731
5276424	0.0	0.645707817021	7.07484409629	18.717059453900003	0.0	0.201219512195	0.0	0.304239810092223	0.006243582540527746	3.8131553795185	16.0407948366628	152.2820905561	0.13265465935804446	0.185317250673077
5275218	0.00907751474821	8.873714194989999	4.13133286181	144.501718018	0.0	0.0456293938188	0.0	0.03287275670817032	0.00907751474821	12.237449759958	10.40019239842	382.71101697169996	0.09058435610917497	0.09261933511192057
5293531	0.565103799004	0.301409203625	0.38875861363	0.474897977201	0.0	0.942424242424	0.0	0.9678410701076698	0.38174985643277615	0.486354434510046	0.576356907520946	0.7092132501057461	0.8325854332067776	0.8490813152669865
5275556	0.014160126982499997	0.100748808472	0.598584121326	62.4893052938	0.0	0.0561009817672	0.0	0.12849235154530472	0.015373131162868519	7.31584101398074	8.21913461813447	345.0728444182	0.12574778655179172	0.13306480056056472
5276474	0.00485693177727	0.0439852662603	12.5600028551	137.387653688	0.0	0.130487383339	0.0	0.1687096833532257	0.01322065266152238	1.5230421544142998	15.898558854830005	242.86736955184003	0.2430351392972856	0.2604829573074495
5276440	0.00630053665397	0.216545173924	0.21798435524	1.26762004831	0.0	0.282072368421	0.0	0.2951463490806618	0.01991713606782451	2.5098469766164007	23.226018123262076	221.359435727469	0.1872669916833284	0.2197164817541982
5293273	0.08689483262	13.650971789100002	10.4674539633	28.105735283	0.0	0.776484284051	0.0	0.6184894429455238	0.0888157046784524	14.705549510004001	11.117713853835001	63.40584594077001	0.3072569602920418	0.2661153904331504
5293161	0.0964871480828	0.931506398179	0.925180404469	4.7458688658	0.0	0.23582580115	0.0	0.1821494171078397	0.07823527416107875	1.9481286017120003	1.1158203055895	16.81324491059	0.3288672350791277	0.2390025997792632
5276628	0.104074831664	0.0	0.00755365205987	0.0704570801172	0.0	0.017142857142900002	0.0	0.16454430921104451	0.012239983562634407	4.311301033222	5.16589373982663	258.6967531131392	0.0845300854391541	0.10828432829619793
5293733	0.0018117791772	0.0	0.0126390250807	55.0812255405	0.0	0.0	0.0	0.01944459922109244	0.005722808394164749	2.0604616484114997	3.5701538770751	107.8578368505	0.1920753126315763	0.2321673617765353
5293149	0.11585472797	0.90955546435	1.28163765377	25.935834906300002	0.0	0.212606523656	0.0	0.23002255140037084	0.05547672088185096	9.697146936623	8.180313055528101	42.181344292474996	0.3741186970104523	0.3674396419589635
5276536	0.101964056091	0.00182746176142	0.00365492352284	0.00411463255296	0.0	0.76	0.0	0.8762841861810631	0.031660396263209684	9.604288642982619	11.40936577209484	280.912202330653	0.11579576389382952	0.12993784749900966
5280872	0.103188542599	2.04168552964		31.3178966838	0.0	0.365996343693	0.0		0.12622863340903845	3.380480377299	0.0	59.7688415395621	0.6163062536528225	0.002604669809272449
5278940	0.8607859344040001	0.973842516319	0.973842516319	0.973923905327	0.0	0.926966292135	0.0	0.937851348007354	0.07683717772452829	3.838991510109	4.305745328839	143.020473500327	0.2579076923080486	0.26480132944392204
5279778	0.0123376635005	0.0379310363205		2.3422794539700003	0.0	0.306959947472	0.0		0.014431941679586831	22.9755080519705	0.0	631.85552647497	0.2903838383840817	0.0
5280686	0.7501360429680001	0.16273631597899998		0.182626310154	0.0	0.891089108911	0.0		0.7501360429680001	3.2323685415370003	0.0	59.61295639641511	0.5354647720544801	0.0
5279326	0.0669602546285	0.5863542730219999		20.9466923759	0.0	0.273563218391	0.0		0.035737485886920696	9.8968050616224	0.0	90.07708695903038	0.3362417535648945	0.0
5293533	0.88200953547	0.0006817161411159999	0.0006817161411159999	0.0006817161411159999	0.0	1.0	0.0	0.9999999999884972	0.10588857274316801	0.184945230885046	0.18759829389094604	0.23431527290474602	0.7755637126377948	0.7874283748934799
5279318	0.0491589881066	1.02389411454		37.8339309577	0.0	0.287292082502	0.0		0.0491589881066	7.14852852252	0.0	94.5256244877	0.5687166705308812	0.0
5279242	0.625851055456	0.106414040085		0.106414040085	0.0	1.0	0.0		0.08023509446243537	6.231048448065001	0.0	56.798107570085	0.6527651197548393	0.0
5293619	0.790412607246	7.1409383745	8.28008267749	14.529277953800001	0.0	0.8666161424779999	0.0	0.8873376592339763	0.2948752065015787	13.619396577609999	15.166231720270002	37.66619915586	0.7816805131977468	0.8297857818670518
5279716	0.789965143876	0.0815433871467		0.108666950604	0.0	0.810344827586	0.0		0.09301674090720907	1.1745037053618002	0.0	12.607071877162099	0.7202938211147126	0.0
5293681	0.053169682893199996	0.035373893875699995	0.0381948889517	0.915903554298	0.0	0.107142857143	0.0	0.11115016391461052	0.06017731832359904	2.7872323774057	1.7696642013317	22.315708266498003	0.2211851851854631	0.2113043840986629
5293757	0.247649172768	5.87272600347	3.8917276399	83.3551000854	0.0	0.46021611002	0.0	0.4454408459651076	0.3847101213403145	10.560678288793	9.089745661953	108.848703230063	0.5070877708411076	0.4957997682461723
5292555	0.0122637707693	0.0624273088761	0.0295905444073	7.471592230289999	0.0	0.183823529412	0.0	0.0883269217269021	0.014677368164311047	2.4709336229121	1.6263686224645	38.0161046047657	0.2523547880692393	0.1485758854415652
5275528	0.0177490841122	0.00181386440818	0.0023909436713400005	8.053747663460001	0.0	0.0136054421769	0.0	0.02081168856722098	0.0177490841122	8.67833468033692	8.36652735890981	274.51854183356005	0.07057654075554197	0.07117390602561825
5275758	0.540912420046	1.12681649448	0.899564425432	2.67451129483	0.0	0.7839506172840001	0.0	0.6726847863810997	0.17009877542074114	1.12681649448	0.899564425432	2.67451129483	0.9635543214161832	0.9166675715270696
24716080	0.788654230421	0.0	0.0	0.0	0.0	1.0	0.0	0.9999999999685678	0.07076356580179884	9.22397383859975	18.15509017815609	332.43464723555365	0.38049509176255975	0.4501968380562322
5279742	0.0	0.0	0.340156063437	0.340156063437	0.0	0.968983957219	0.0	1.0000000000010685	0.010573900496204094	3.85310427372	6.529657138261	77.944371709327	0.2972932888390347	0.27120856682643263
5279796	0.00023601681654900004	0.0197007098177		24.307811328200003	0.0	0.559779758783	0.0		0.02415441116541753	30.368867791103696	0.0	731.3608887925999	0.35521389888431165	0.0
1159631	0.0	0.0		0.0	0.0	1.0	0.0		0.07792615658892338	1.57454760260842	0.0457785840845	22.07235252858202	0.7116220987814613	0.1429445678130365
5294159	0.0531798822345	0.0		166.921756404	0.0	0.0	0.0		0.0531798822345	23.66040788935101	57.17434922922399	2178.7740680798	0.2337351259464407	0.2583885175728142
1158611	0.117837345989	0.00982001068769		0.0132192451565	0.0	0.910148674855	0.0		0.038937040540208516	1.4217148096671102	0.0	19.82863615382852	0.6049928780271469	0.0
1166397	0.239315525154	1.324068387	11.452035569200001	17.6937931612	0.0	0.431570306087	0.0	0.6713423955343477	0.25825646517438705	11.399109282785	29.956308964829997	36.19806655683	0.4725913621265487	0.7372596088846095
1159529	0.0650761846105	29.044726385700002	29.0477889525	61.3930867666	0.0	0.59902427692	0.0	0.6312720028578758	0.02611688497737201	29.525693095837003	41.53576529852499	166.9782930359	0.6841030159812105	0.7107928657077882
1165069	0.17457956259100002	2.31118212588	5.10278799484	12.8779476575	0.0	0.429234338747	0.0	0.6098344235231272	0.06059521718425963	3.845508369735	9.16155889529	54.47528309219	0.2996488490050551	0.564754031978832
5293691	0.0328003375635	0.06174407822250001	2.33305049023	45.52841045899999	0.0	0.0284090909091	0.0	0.07622052855271881	0.02542172989084816	2.8489764556282	4.1027146915617	67.84411872549799	0.16963316692011052	0.17518037497502428
1159545	0.992124200602	0.0119805936702		0.0119805936702	0.0	1.0	0.0		0.12701010415855385	54.2743486959552	0.0	113.22701473528922	0.5714683368127803	0.0
1159491	0.15256815849400002	0.740461508271	3.89807245935	17.1163299286	0.0	0.359248461289	0.0	0.3184418590525349	0.018845893645706126	59.790173961121155	13.09155831506016	145.40205274280066	0.5854683631759144	0.3890703093681792
1160613	0.07250328755539999	2.08206898195	0.386808048002	23.5814287325	0.0	0.310109622412	0.0	0.16575348603547752	0.09003591107182565	2.6976730209987	0.858408057713	25.199999893678	0.4644483362522683	0.3132851112077433
1159639	0.011246170378700002	0.005018058640420001		0.005790067662020001	0.0	0.996913580247	0.0		0.008093344224307998	1.57454760260842	0.0457785840845	22.07235252858202	0.7110871440898135	0.1432097367697216
5293667	0.0619043209644	0.00504964160427	0.005725040273319999	0.602887952149	0.0	0.254807692308	0.0	0.2784446533670209	0.050004267031437684	2.93034859504297	1.98615515442502	29.274697822577004	0.22085018030840364	0.2251092471646064
1159581	0.08013419807639999	53.6915155239		111.12031000299999	0.0	0.5158685446010001	0.0		0.08223416660513311	61.32196909316471	0.0	235.54679268719127	0.546401295996658	0.0
1159571	0.196268145673	0.435217498685		1.06790388504	0.0	0.614140203715	0.0		0.030001276815035706	5.233629621504998	0.0	25.05715010974	0.5803355162824229	0.0
1159489	0.803594006591	0.00866745811072	0.00321312225424	3.07596076635	0.0	0.919902912621	0.0	0.10193771233604974	0.3080305356923541	41.66557817748872	4.66239199584424	108.26945934875	0.6369223867203376	0.2271715008292735
1159619	0.015680705231700003	43.606624228	24.1581202096	231.56789511099998	0.0	0.5089206426089999	0.0	0.4774071535232532	0.013436885317357957	49.65199293944	26.74124990498	332.437595858	0.6465833648187566	0.5437782920013957
1159675	0.0	0.0	0.0	0.0	0.0	0.997705544933	0.0	0.9999999999999644	0.012347534586594176	0.6107465084384599	0.14049309396568	47.371594250600005	0.7751395549967078	0.6736191076191761
1159465	0.329278273704	1.22368195734	0.203032166639	2.32010310373	0.0	0.7317954419120001	0.0	0.549235118122226	0.13697815456031268	61.91327437358901	9.872154320383	136.14572380225002	0.6147471672587604	0.41333588816570094
5293571	0.0	0.0	0.7542960745049999	1.3455382699599998	0.0	0.0	0.0	0.6909890507590345	0.015491759632872446	4.7011896203323404	8.57618284925133	186.49209750101312	0.11535537818292807	0.1220799630312935
5293567	0.0	0.0	0.273123342544	5.7101140930900005	0.0	0.0	0.0	0.04114878895542155	0.08630488143833152	23.66040788935101	57.17434922922399	1950.0314764370896	0.24902594711090484	0.2772156768426114
1159561	0.382446466245	0.316597757163		1.7772384063599995	0.0	0.58733880422	0.0		0.5451827992875883	54.008113281063004	0.0	112.89754840935998	0.5284468974054579	0.0
1160615	0.0285058311022	0.0172258142848	0.0938191670866	46.156796972799995	0.0	0.0110562685094	0.0	0.060665505520297	0.0285058311022	3.7845949771578	1.7359411836706	286.02131954261	0.2265793557667627	0.10572322321437336
5294169	0.030993471129200006	0.0		21.0707041378	0.0	0.007836990595609999	0.0		0.030993471129200006	2.9010931565319997	2.52263324128	144.38169182239	0.24461142970152425	0.2584547528124585
1159725	0.22624755527399998	0.000125173537526	0.765205955089	16.9830912206	0.0	0.00752587017874	0.0	0.26730767507742104	0.13121328483872674	1.3130919143806468	1.9268226487610087	105.8763802194574	0.29545454545458616	0.3437833502187208
5294091	0.9724844479829999	0.0		0.000103830163425	0.0	0.666666666667	0.0		0.020294774507667486	2.739143817871	2.52263324128	84.31635431476344	0.3004263693015585	0.3215002504852253
1158045	0.0228409164173	0.038255128311	0.0452408473939	0.763760276313	0.0	0.243377483444	0.0	0.27967108403788216	0.016230191877445798	8.09934164933964	8.153451555866022	132.25985460077823	0.13688771571569508	0.1300537535209939
1160619	0.10409128320599999	0.005725003778930001	0.0	1.39776217658	0.0	0.243961352657	0.0	0.11072700668867562	0.10409128320599999	0.32883475307653004	0.2786249915951	82.328747871937	0.4484740197023582	0.4127299192001279
1166425	0.235162873436	0.038667677552400005	0.0741130486422	0.100351829838	0.0	0.5254413291800001	0.0	0.8058969286045147	0.14326314368012127	1.4575241233644	11.1954399555002	44.079694118458	0.493836246550205	0.6042676891227843
1159637	0.0	0.0		0.0	0.0	1.0	0.0		0.007908454509552703	1.57454760260842	0.0457785840845	22.07235252858202	0.7118082451158394	0.14285229788803455
1159647	0.013392860263	10.3409287759	0.0	117.74456850600001	0.0	0.575631323867	0.0	0.11482090212292435	0.010687050753080836	10.3409287759	0.0	117.74456850600001	0.6703107969745871	0.2953330470018037
5294179	0.0380675585913	0.0		13.102627979200001	0.0	0.00216684723727	0.0		0.0380675585913	1.9289376491427104	2.24234201069242	118.7729765012	0.1304037520391173	0.1448755737087016
1159737	0.11628967329000002	0.110043555847	0.06517142627849999	0.227453469066	0.0	0.658385093168	0.0	0.5182294091098832	0.3808598837647092	0.11639755603355	0.07152542646504999	0.23380746925255	0.9415159676799141	0.9140347152864244
1166477	0.198949547912	0.925949044176	1.00091121742	1.00091121742	0.0	0.980343980344	0.0	0.9999999999998841	0.14927625516376006	1.847171129455	2.221131387577	280.99037368282	0.7290937378452298	0.771365430592813
1159423	0.17403061728799998	1.80665405304	1.12042203289	13.130110059200002	0.0	0.619318181818	0.0	0.437725117251734	0.056935069249595176	3.5178321274227886	1.8003936412817902	28.3495062631008	0.8133204633205474	0.6751149297486955
1159507	0.198016340237	0.150097656995	0.08821528963739997	2.0093013458	0.0	0.5952080706180001	0.0	0.4785402778096091	0.03283957026078633	8.854053333635003	3.6104079687474	38.47262981510001	0.8195161453585238	0.7678789579237526
1159431	0.7739265991159999	0.0	0.0	0.0	0.0	0.9453125	0.0	0.9110759834591426	0.3014480733478208	1.7111780743827902	0.6799716083917899	15.219396203900788	0.8652088772847284	0.7448282420032365
5293403	0.012336889869600002	0.0509244253117	0.0412349329417	1.50254412842	0.0	0.28045325779	0.0	0.22837844041261346	0.020083499880692617	2.354878370639	10.055893078015199	123.79623358728998	0.2598410295233735	0.28316251081098925
1159453	0.0561649121636	7.12919887202	1.22153886082	100.019614782	0.0	0.532021466905	0.0	0.2907190352365312	0.04670585811184192	7.791466230790241	1.5880388311672398	103.35952270251524	0.7172796668978657	0.5806141701377177
1159459	0.4702484506220001	1.43421963532	0.461214524374	12.407657858299999	0.0	0.888777955272	0.0	0.7052769148800976	0.5046981777432499	3.91791654221	0.836052400039	18.72403088854	0.7419432227111868	0.5564607521094698
1159537	0.00865711508013	0.105309795472	0.121415999485	31.1781628629	0.0	0.60990761389	0.0	0.6168349619719284	0.005846916286970321	22.946304949471998	16.176523339684998	267.17806305290003	0.6804291287385753	0.6807655080599974
5293677	0.0639238541796	0.138066576033	0.21076591282	6.35610160393	0.0	0.182133564614	0.0	0.2481970518085833	0.06287413429098293	2.9252989534387006	1.9804301141516998	28.671809870428003	0.21548778944727545	0.2166868016451058
5294099	0.0324594149428	0.00213309220271	0.211301790507	49.3567918799	0.0	0.0842332613391	0.0	0.13099844860552518	0.03836824384923728	2.16116714569471	2.462983263535	96.96742303001	0.33301064859633145	0.3414341545611779
5293615	0.0173601734285	0.000207660326851		35.1431569312	0.0	0.0016501650164999998	0.0		0.0173601734285	2.739351478197851	2.52263324128	119.4598227364537	0.27335769144745403	0.29237320519855403
1159651	0.0104871262372	1.23187015817		10.6945834677	0.0	0.486707115279	0.0		0.009138454947559264	1.5695295439680002	0.0457785840845	22.06656246092	0.702867033552362	0.1473283196485952
1159599	0.0551828708169	1.06125859055	4.18501647597	9.70946248149	0.0	0.998277917605	0.0	0.2603382306033433	0.06147193193934442	7.1066273019900015	6.7681461713500015	110.57916322848999	0.7532127349118926	0.5350690038338166
1159665	0.018442155323900002	8.356950675650001	12.8035935648	87.1583436427	0.0	0.506055771521	0.0	0.5309257382597421	0.016328271783536037	19.80311472825	63.497531768500004	382.69539439370004	0.612416897194455	0.4357208802256777
1159463	0.162754138837	4.21882095793	0.296416060068	55.609967785200006	0.0	0.43669527897	0.0	0.3227367121003178	0.08490416777442535	64.908413374179	9.965538213812	189.43558848372	0.5641336894070172	0.3764678138010387
1159611	0.179972469928	2.44668765755		49.239548775699994	0.0	0.5090410958899999	0.0		0.03264906898305535	25.639804581529997	0.0	196.52140682220002	0.6533857423619855	0.0
1159533	0.00215237184683	0.20963132591	2.14586577634	17.1084905348	0.0	0.8289286729180001	0.0	0.8840655995835404	0.002109216521580276	0.480966710137	12.487976346025	105.5852062693	0.7288788360434406	0.7526436487053978
5293637	0.025860561065799998	0.0		2.48399101205	0.0	0.0	0.0		0.025860561065799998	0.178819043499557	0.255179240024901	10.550124167086999	0.13703852327456156	0.15235938270892282
1159667	0.0014120628389000002	0.162652803629	0.0457785840845	2.25693561991	0.0	0.8626522920499999	0.0	0.2909634234658731	0.0011962742206141012	0.78054103980334	0.1851128604035	39.21509018967734	0.8026399693918497	0.4648490452912679
1157299	0.00539227212763	0.06275601359079999	0.0594530655071	48.3614379743	0.0	0.0166265587399	0.0	0.015583020095547618	0.00539227212763	1.2138687491828	1.0494758532591	107.4803970014	0.06569553914097685	0.05833347811951864
1159531	0.0417855357147	7.22920157237	0.32228606304900004	51.5236789612	0.0	0.506827848668	0.0	0.5127580623474204	0.025518497253855216	7.500536956597	10.664396632734	140.0003946957	0.6215955541266739	0.632971960207609
1159681	0.0	0.0	0.0	0.0	0.0	1.0	0.0	1.0000000000030926	0.005773278977743539	0.00161876653146	0.00115881764668	10.4554067804525	0.6494772818656183	0.6616039740625543
1159557	0.799179890649	0.254254821222		0.317485732259	0.0	0.936284372904	0.0		0.06228393654348964	54.262368102285	0.0	113.215034141619	0.5575725644218545	0.0
1159655	0.0	0.17500658216899995		9.115043373310002	0.0	0.769193391642	0.0		0.01144081124774033	0.3376593857979999	0.0457785840845	11.37197899322	0.8483700898490893	0.2464989751482993
1159595	0.0	0.0	0.0	0.0	0.0	1.0	0.0	0.999999412448368	0.01806366258672601	1.06125859055	4.18501647597	9.70946248149	0.9983870967742116	0.3072323824548083
1159597	0.00466791654944	0.0179213123338		0.0657114785572	0.0	0.309644670051	0.0		0.0002958587053553659	10.358850088233801	0.0	117.81027998455721	0.5734221510181551	0.11386724818649295
1159603	0.0	0.0		0.0	0.0	1.0	0.0		0.05510257827999712	6.04536871144	2.58312969538	100.86970074700001	0.7157133011714647	0.5771078129130893
5294089	0.126600592624	0.0		4.0484160110900005	0.0	0.0759493670886	0.0		0.03749027511284174	2.739143817871	2.52263324128	88.36466649568999	0.2988917861800689	0.3195092124281134
1166479	0.197762154689	0.162931892817	0.184716009127	20.4912445174	0.0	0.733215547703	0.0	0.7806001566668491	0.19857346253750754	0.9212220852789998	1.2202201701569997	279.9894624654	0.6508543738842509	0.7001685906932891
1159605	0.0649684794731	22.1656129715	5.11305185819	89.9227751031	0.0	0.7585064074240001	0.0	0.7434326196856781	0.05942052602648034	23.22687156205	9.29806833416	99.63223758459	0.8441804326219159	0.5708156109678031
1160589	0.171008845222	0.158870745545	0.000416658032918	0.159079074561	0.0	0.7466666666670001	0.0	0.5889685477774705	0.07919961380691905	0.34050795491970004	0.190310104197318	5.433658662887	0.4084976395446038	0.3802337453220447
1159625	0.12393749858400001	0.679867948289		1.31032568443	0.0	0.743042569574	0.0		0.07441439877834079	1.214434535359	0.0	3.13805521867	0.8540961408258018	0.11107481682099044
1159591	0.0	0.00181065412471		0.0120161591913	0.0	0.932461873638	0.0		0.07577954266681405	7.6304535692647075	0.0	124.4264826841913	0.5573575327392991	0.0
1158617	0.0	0.0		0.0	0.0	1.0	0.0		0.03520409659055942	13.289136347340419	0.0	13.289908356362018	0.6767334360552967	0.0
1166373	0.402736744867	0.231407749117	0.222660755273	26.477808669899996	0.0	0.61214953271	0.0	0.7712237396448022	0.2367588719696163	1.555476136117	11.674696324473	44.1716018311	0.4442142000222128	0.6783359414956207
5294111	0.07978327817919999	0.118799552725	0.171341186353	1.7696003286500002	0.0	0.23202470225	0.0	0.20515861610167965	0.10074306300123226	0.7966741297205301	1.11510674739153	2.7752139095485298	0.5542024356160498	0.5366009807738569
1159499	0.353420222771	12.72824363	2.19600181218	26.0307721722	0.0	0.855263157895	0.0	0.21088928465956627	0.13639292524890584	41.656910719378	4.65917887359	105.1934985824	0.6315933814789504	0.2295298663498516
1159627	0.0	0.0		0.0	0.0	1.0	0.0		0.0948089887896741	1.5695295439680002	0.0457785840845	22.06656246092	0.7169970833157975	0.1403221751837573
5293683	0.0434283049962	2.1399325963	3.40622241537	31.737630070999998	0.0	0.165946865594	0.0	0.16081888663595093	0.038064534972496164	2.9449512995313705	4.58461569322303	34.576130511010035	0.32171181782525105	0.3131296413008361
1159525	0.0638027799175	28.3262970582	2.46317706141	54.4586459304	0.0	0.682174053704	0.0	0.2933228116519081	0.0608822807924958	83.8444266855	2.5715832106970002	220.5213696914	0.6851434488637655	0.3068057215839503
1159439	1.0	0.0	0.0	0.0	0.0	1.0	0.0	1.0000000000035263	0.4517279754276036	1.7048240741962402	0.67361760820524	15.213042203714238	0.8395012067580079	0.6946573941000596
5293617	0.051825523842900005	0.0103195046831	0.00982883869438	0.0223873632203	0.0	0.47572815534	0.0	0.4497793411642864	0.017417818648539328	3.2665765223486005	4.532295305403978	71.88173233103029	0.14610848077116487	0.14294482410251128
5293717	0.8745334850830001	0.450578998378	0.7228729943089999	0.7228894002399999	0.0	0.950963222417	0.0	0.998823253576837	0.2501123432611002	0.7686531140319302	1.0306050184230298	3.73398603246853	0.7294797687861859	0.7151753806491227
1159521	0.0	0.0	0.0	0.0	0.0	1.0	0.0	1.0000000000007006	0.0	0.480966710137	12.487976346025	105.5852062693	0.7300669506998541	0.7537276205430886
1159523	0.04367799661999999	0.698830857029		4.63396547499	0.0	0.51471623715	0.0		0.012781013086362144	56.21696048432901	0.108406149287	170.69668923599	0.6648288376311648	0.27242932042597984
1159443	0.0557875121375	84.3568456805	8.376711193239998	187.202625297	0.0	0.548134062277	0.0	0.15840950306327747	0.19081270930172006	84.95459616212572	8.736895641487738	187.9432364338327	0.7267234276297636	0.4811130584076057
5293553	0.021323155269400002	6.81419589912	3.97848705886	116.297851888	0.0	0.0308166409861	0.0	0.039182099184707886	0.021323155269400002	18.28417889952234	19.348905794066333	276.5457759726531	0.10098308515229762	0.11090228982095852
1159469	0.126142270247	1.26001494955	0.171805709026	3.99626992651	0.0	0.55319706499	0.0	0.3583247535542625	0.09711149063807788	60.689592416249	9.669122153744	133.82562069852	0.5937468834150207	0.38895344928150943
1166515	0.057304084113099986	2.32889436604	2.32889436604	2.32889436604	0.0	1.0	0.0	1.0000000000006437	0.249481728173346	76.51883463034001	86.51009310234001	86.51009310234001	0.9933936521615976	0.9999999999999076
1159671	0.0169323841349	15.057506930799999	15.4892469701	243.38195773700002	0.0	0.3970891018810001	0.0	0.3895932961571205	0.011255163957072071	15.666634672707	15.628581246419001	280.33135181250003	0.6233501664180249	0.5407899450588591
1157307	0.05652717067009999	0.8504358525169999	0.7524845979420001	16.7371749614	0.0	0.124858115778	0.0	0.12228502522783764	0.05471482330842379	4.3437400826670025	4.808114716752	123.21818202440001	0.12175895146757534	0.11545615687783516
1159059	0.205241463323	1.56466921908e-05	0.000172113614099	0.0264402099274	0.0	0.0322580645161	0.0	0.34725700726065084	0.1321746897541069	1.3129667408431207	1.1616166936720091	88.8932889988574	0.36443542934420176	0.36210510876620816
1159575	0.0380430015821	0.140292512428		0.181825326348	0.0	0.314960629921	0.0		0.02740205431450953	20.159028436868	0.0	223.77079937854802	0.5185204839740213	0.0
1166369	0.160049445164	0.113851937	0.0	10.1034217576	0.0	0.157141884068	0.0	0.03376896559215665	0.1437005110099715	1.669328073117	11.674696324473	54.2750235887	0.26750524109039736	0.2815691585505995
1159527	0.034346773383999996	37.232646117899996	11.329654642000001	40.520108334899994	0.0	0.7561601642710001	0.0	0.3843812802345129	0.013531875518646515	92.7507757452	11.438060791287	206.5828320959	0.6954745280577548	0.32081911915320976
1159433	0.117543603701	0.0	0.0	0.0	0.0	1.0	0.0	1.0000000000649985	0.2072559770848123	0.27695843906279	0.21875708401779	2.81173834560079	0.8370759675105225	0.7922681344420335
5293625	0.027229465934200003	0.0014889195445	0.00645198469283	16.1079102067	0.0	0.00674915635546	0.0	0.02721063517483472	0.027229465934200003	3.2256312647645005	4.499412208422831	82.88306315049998	0.13746893858749465	0.13658518506356787
5293603	0.10078149614	2.1181265598400003	3.2826011398	87.639071515	0.0	0.135471204188	0.0	0.1462407280218633	0.06087133818407325	4.548286383110301	6.438590047347001	195.95880352089	0.3581201205840175	0.3981345821531608
1159669	0.011778012228299998	17.8079591573		110.013699976	0.0	0.663008716373	0.0		0.02040736173589237	18.425847393474342	0.139334276319	146.97185454576734	0.7035429805783714	0.2171676166983583
1152261	0.00535599032347	4.90670535978	0.12809436582	41.68756789	0.0	0.391982182628	0.0	0.02716758770985133	0.00253670355698978	50.555825916447	13.332497152500999	125.87044668704701	0.6385939216405162	0.4048110330453563
1160751	0.11479266184499999	0.0299993783701	0.025416140008	2.61458035906	0.0	0.282352941176	0.0	0.2368387752117448	0.06876565170617396	0.2744297752653	0.08680000996531799	3.398166895979	0.33460352023190243	0.24787071328350416
1166497	0.0	0.0158362854272	0.0158362854272	0.0158362854272	0.0	1.0	0.0	1.0000000000101579	0.3287172169440521	102.5633799868272	116.5424007724272	387.3525351684272	0.8300481822162185	0.8790373925857311
1159437	0.882212399504	0.00988631503424	0.00988631503424	0.00988631503424	0.0	1.0	0.0	0.9999994803012566	0.9415948341233	1.7048240741962402	0.67361760820524	15.213042203714238	0.8369876072451619	0.6898753704477514
1159473	0.293998778127	43.859321348900004	2.51944632496	69.0844279158	0.0	0.591785714286	0.0	0.4057699686541558	0.15962865591752626	224.22748962800011	69.37924128497765	382.0205767798007	0.6585219156454855	0.5489208311316496
5293851	0.19134619596400002	2.0380573615	2.52263324128	48.7505772241	0.0	0.325831525669	0.0	0.3543941662073218	0.1424639851589004	4.37403861440866	4.883618756703201	55.604097718267	0.4337859172720321	0.4566013867147881
1159461	0.503508079073	1.2624874746	0.323599586554	1.91500596778	0.0	0.842721518987	0.0	0.5467643573989861	0.10505532893847136	2.9673115487962405	0.99721719475924	17.128048171494243	0.8387127487384693	0.6468180724153704
5294151	0.0329478551139	0.0	0.0	53.5449785651	0.0	0.015214384509	0.0	0.017202941931408013	0.0329478551139	2.1734104262116003	4.9720907501000005	191.71188541290002	0.10036511156163556	0.1097789922626486
1159609	0.09033959272119996	0.109236415708		3.6934432659500014	0.0	0.39138576779	0.0		0.0577377892043853	23.302353339688	0.0	150.97530131245	0.6173740703675147	0.0
5293475	0.21972946743299998	0.142109129432	0.163889388976	11.0120393004	0.0	0.303092783505	0.0	0.3756289489046414	0.10591047035967628	13.083446584612	15.463706965815994	373.51963764988	0.442140570208914	0.5076594889612241
1158041	0.0	0.0	0.0008133128285410001	0.050018738955300006	0.0	0.397260273973	0.0	0.4224149652799266	0.0059687167124782975	0.6354268593272699	0.3517418385309451	48.852669345225294	0.2911111111113102	0.2181180548856412
5293837	0.07211945614450001	0.701086456371		35.5656732605	0.0	0.0504871567759	0.0		0.04089914377906522	2.739143817871	2.52263324128	84.3162504846	0.3003362585091288	0.32157935331073634
5293461	0.187713362689	3.4376639760400005	3.43025542061	18.9495651029	0.0	0.370984455959	0.0	0.3365576936816224	0.062366245639690135	5.559331681342	7.689451421375999	51.545219686879996	0.4074595355385229	0.4367643479538777
1165303	0.112674298002	0.8268521372229999	1.16003225991	36.6377269458	0.0	0.264994341758	0.0	0.38234079372716295	0.06788949112590212	6.049825454246348	4.062492639731901	125.58734547368134	0.323401214719575	0.40818109371962896
1166343	0.295258280092	0.5649481744039999		1.13631401723	0.0	0.46875	0.0		0.10804181210709046	0.6788001114039999	0.0	11.23973577483	0.17385418681121048	0.03195785366199006
1159451	0.774004087137	0.102651856374	0.102651856374	0.102651856374	0.0	1.0	0.0	0.9999997165994826	0.2502118368025814	0.76491921514424	0.46915182672124	3.44255977688924	0.8561562746644923	0.7949418322570265
1159393	0.0125360893728	0.415394818046		6.804923058559999	0.0	0.232193064667	0.0		0.013998241103844818	0.629964928564	0.0	13.768208433829999	0.34150638672714184	0.0
1159645	0.0267197048747	7.628642915139999		124.414466525	0.0	0.5494598747739999	0.0		0.040419705532983186	25.43660207244	0.0	234.428166501	0.5974302933972002	0.0
1159573	0.860155703633	0.0307929181727		0.04356453777290002	0.0	0.974206349206	0.0		0.09942646358931903	4.829205040992698	0.0	24.03281076247289	0.5870604382602027	0.0
1159563	0.41157171328000003	13.8076738454		19.1282331215	0.0	0.909919571046	0.0		0.08576208723259254	67.4991893693	0.0	130.24854312449995	0.5570627802691572	0.0
1159659	0.0	0.0	0.0	0.0	0.0	1.0	0.0	1.000000000000326	0.011470955798939884	11.4461640526	50.6939382037	295.537050751	0.6750730838399045	0.42771604826587
5293835	0.6981526495479999	0.08553142845629999	0.101934716105	4.1357666160900015	0.0	0.773162939297	0.0	0.8439689771697394	0.4089532827799077	6.563989631566299	6.988083758885001	27.272687818150004	0.7535269709540887	0.8144114245792501
1159613	0.20774689960099998	0.0959688029252	0.447143849102	4.61076629473	0.0	0.454614797864	0.0	0.62345135029935	0.05146564349525907	84.2184641587252	29.955964155492	742.0778469848299	0.4406516864652088	0.4085431697293006
1158609	0.0943138126609	13.284118288699998		13.284118288699998	0.0	0.638371290545	0.0		0.06432683667417842	14.696013087679415	0.0	33.09953519737202	0.5896649630892815	0.0
5293527	0.29809404579599996	11.4833460008	12.4030769821	357.751905622	0.0	0.405596654873	0.0	0.4767727535272954	0.3291955154057845	15.51102328435	18.534467585959998	458.548834167	0.3204856199902796	0.37488681082230907
5293845	0.0191747745461	0.0853761485778	1.14338159444	25.1111037396	0.0	0.0114535610162	0.0	0.05322441952553585	0.0191747745461	3.01572474362077	3.12953674886502	54.38580156217701	0.1487852074824048	0.16595415920339254
1158603	0.0	0.0		0.0	0.0	1.0	0.0		0.03522180191994277	13.289136347340419	0.0	13.289908356362018	0.6768330252616875	0.0
1159565	0.0424097407707	4.48912268918	1.77720587028	56.9149991839	0.0	0.8015691402420001	0.0	0.8523826068131602	0.025452071676369408	27.33011784318	17.83231321048	292.91489937389997	0.7085937924661085	0.7165736304639886
1159577	0.052215810620099994	0.407978806994		10.9842070375	0.0	0.142587346553	0.0		0.02833167359247608	20.426714731434	0.0	234.5731810897	0.5078686310835834	0.0
1166437	0.206783250536	0.0	0.0	0.0	0.0	1.0	0.0	0.999999999878734	0.16696714349061748	16.192007066600002	20.505638775999998	305.209518908	0.4323612417688116	0.4981164922270784
1159621	0.0	0.0063220927259	0.00920675537054	0.0134644915379	0.0	0.479338842975	0.0	0.6668134388085785	0.0	43.61294632072591	24.167326964970545	231.58135960253787	0.508776862823673	0.4783277464342604
1159623	0.040801960288999996	0.924094245696		11.3678115242	0.0	0.329378112088	0.0		0.03496612833340425	1.4586608327659998	0.0	13.195541058439998	0.530962714078912	0.06124691005445065
1160719	0.29808857561700003	0.472285911674	0.448016014067	1.21764323523	0.0	0.666183714865	0.0	0.5591911613512697	0.2358292608200621	0.8353070382153	0.7665523829058001	82.18854030783069	0.4939643107065892	0.4552231333649744
1159449	0.8114769572239999	0.391662919894	0.154096886516	0.534523575101	0.0	0.954591836735	0.0	0.8785904779986915	0.3721785202643056	2.09648699409024	0.8277144947212399	15.747565778815241	0.8634529624125954	0.7329360991798344
1159425	0.400739464286	0.592913418805	0.508596424945	6.68104030515	0.0	0.614907771394	0.0	0.5826499065835795	0.13000333740118486	3.250815011465	1.172843115958	21.40880126718	0.7341044239692524	0.6171875402018983
5293839	0.027135520262199998	0.00265545927687	0.005491972595340001	19.534033025899998	0.0	0.00972590627763	0.0	0.019862214322153068	0.027135520262199998	3.1550835889668707	2.8182216412853403	104.3388922153	0.07433102081269917	0.07276349017121919
1159703	0.087022706832	6.418177762359999	7.271522971689999	36.301182593	0.0	0.261115530805	0.0	0.3204113661820713	0.07187627007532567	59.16860212806461	70.7376134027021	198.46907152676656	0.3145229843717865	0.33241425454518075
1160747	0.233336028814	0.0399113772437		0.13288674468599998	0.0	0.283870967742	0.0		0.11069595102434468	0.6156040390487	0.471600009711	1.618571161178	0.6065022421523357	0.4490737482777324
1159661	0.0	0.0	0.0	0.0	0.0	1.0	0.0	0.8173352538510662	0.0	11.4461640526	50.6939382037	295.537050751	0.6637798747686731	0.4078256606321677
1157301	0.0646142500515	0.607436277642	0.5207721837070001	23.0232358908	0.0	0.103757652523	0.0	0.09725896417202197	0.05047422422110888	1.457872130159	1.2732567816490001	39.760410852199996	0.11442734150834855	0.10991367628743598
5294157	0.041116966921	0.0		9.749557107100001	0.0	0.00711974110032	0.0	0.00018234015792813348	0.041116966921	2.4750137064140003	6.632083007852	344.66346237410005	0.13584268307385033	0.16992143515768532
5294095	0.253683937016	0.0		0.000311490490276	0.0	0.0	0.0		0.017943688894148147	2.739143817871	2.52263324128	84.3166658052537	0.3003524879089932	0.3214211865659323
1159615	0.029693988443100002	61.9568823843	24.395768448200002	647.5443055869999	0.0	0.280324048385	0.0	0.22991432438342602	0.03325827610082702	84.1224953558	29.508820306390003	737.4670806900999	0.4402009307821718	0.4016055266097681
1159617	0.145867825526	9.066605300689998	8.080615082080001	28.457198084499996	0.0	0.398246358365	0.0	0.4359231310595548	0.07845310646559386	93.18910065649	37.58943538847001	765.9242787745999	0.4339792793925107	0.4066946541854663
1159501	0.18051661754700002	0.6023700311779999	0.0	24.7040804798	0.0	0.347746511096	0.0	0.012721471013585995	0.28600369348784355	28.928667089378003	2.46317706141	79.16272641020001	0.6084434580851374	0.2314591750166763
1159503	0.10712057852399999	6.992222668460001	0.0900073772355	74.9463163303	0.0	0.289642184557	0.0	0.17116723628319308	0.05860542879608036	35.31851972666	2.5531844386455003	129.4049622607	0.5223010546496897	0.2435704737644392
5293467	0.0681763003632	0.52156712149	1.19856601705	16.8279225561	0.0	0.313043478261	0.0	0.3514215918993984	0.059461916691898174	13.605013706102	16.662272982866	390.34756020598	0.4152583293095717	0.4751256439067035
5293641	0.021925296891099996	1.2546817413200002	1.51387733976	22.4158541494	0.0	0.0458598726115	0.0	0.098584420324728	0.029523526894104483	3.39461433762	4.92009975513	54.1534842204	0.14547823254845393	0.15021112286343766
1159629	0.141473103529	0.852022803592		1.50191436571	0.0	0.454041974349	0.0		0.08949440304016275	2.42155234756	0.0457785840845	23.56847682663	0.6306317115604334	0.099574110574184
5293611	0.300995958024	0.622428440751	7.83465678508	306.081079824	0.0	0.511128465443	0.0	0.5284493066582748	0.13484231263082394	2.8536345547473	10.111257832295001	323.70986398089	0.5924788135591249	0.6307663934339682
1159513	0.0443761846103	179.220314204	66.7666770038	290.67603013	0.0	0.708722065524	0.0	0.6397010721274589	0.17587842711874732	179.595971118665	79.13323735034001	365.0830735364	0.7478490384944176	0.7160656730539983
1159547	0.656598968079	0.191023910185		0.220975394361	0.0	0.8710601719200001	0.0		0.028847787195610274	54.453392012470005	0.0	113.43600953597999	0.5627267159749169	0.0
1159457	0.556598980845	0.0	0.0	0.0	0.0	1.0	0.0	0.9999963956934368	0.4716562475201554	2.864982020289	0.6800885642230001	7.86568138625	0.619515517073696	0.4755034186831388
5293689	0.629572544045	0.374344724507	0.972976381374	1.0601827943200002	0.0	0.902160864346	0.0	0.931389346719504	0.629572544045	1.23526988523747	2.2073119284110296	3.9546255035140296	0.642531272995036	0.6395266402966993
5293687	0.9023994414799998	0.0559064574991	0.055942269184	0.055942269184	0.0	0.971428571429	0.0	1.0000000000151894	0.056810072348689865	0.8609251607304699	1.23433554703703	2.894442709194029	0.5581984792358808	0.5447238972862894
1159435	0.676838946882	0.0	0.0	0.0	0.0	1.0	0.0	1.0000000000049216	0.2099636486297681	0.27695843906279	0.21875708401779	2.81173834560079	0.8385798816565792	0.7941856593548932
1159519	0.0	0.0	0.0	0.0	0.0	1.0	0.0	0.9999999999987738	0.16051390942829674	0.375656914665	12.366560346539998	74.4070434064	0.8150321318801509	0.8471877539594357
5293635	0.0330717630782	0.0007190016913230001	0.00776269767084	11.9017152944	0.0	0.00323974082073	0.0	0.03504684325857988	0.04216226101708838	3.3953333393113234	4.928855065830506	68.11076215781002	0.12887141624353304	0.13646983781001806
1158613	0.015133222824500001	5.75327846725		141.12936293799999	0.0	0.61606403533	0.0		0.007950183982037607	7.16517326622942	0.0	160.94477984667205	0.5779834325656237	0.0
1159673	0.0	0.00876049426734	0.0	0.00876049426734	0.0	1.0	0.0	0.7084051990436121	0.010345007766286631	0.6195070027058001	0.14049309396568	47.38035474486736	0.7682124583775954	0.6105440196942851
5293585	0.112899444229	4.02767728355	6.131390603860003	100.796928545	0.0	0.271255813953	0.0	0.3159540860093225	0.2182506368319495	15.9055828264249	18.228153282903804	160.04036013177014	0.38756739613042657	0.4246800039441764
1166501	0.290968885033	0.653265177505	5.6210126658	26.133677649499997	0.0	0.82451773491	0.0	0.9120823695351644	0.3682244807998568	103.21664516433219	122.1634134382272	413.4862128179272	0.8282818245055767	0.8895915569418356
1159641	0.0	0.0		0.0	0.0	1.0	0.0		0.13474377026841275	1.5695295439680002	0.0457785840845	22.06656246092	0.7094940553676048	0.14404242377515172
1159515	0.183613697132	0.0690349504948	0.234851460889	0.621178447582	0.0	0.867158671587	0.0	0.889502664814654	0.2108785180851108	0.44469186515979997	12.601411807428999	75.028221853982	0.8293473854883351	0.858808488497097
5293569	0.00395589599231	0.0	0.00033131998498	34.1130878261	0.0	0.0	0.0	0.0015027081203146198	0.00395589599231	4.7016866003098094	8.579993029078599	223.3390575728231	0.10192140428538428	0.11075777406434527
1158073	0.19435349192600002	0.376029424137		53.0501599922	0.0	0.321043675553	0.0		0.07266433936001905	2.186694781851441	0.0	155.43937727368998	0.2459856969366883	0.0
1159535	0.00315793167739	0.16602558875499998	10.2206945702	57.2985528716	0.0	0.789056546258	0.0	0.812106091956813	0.002806883557971286	23.11233053822701	26.397217909885	324.47661592450004	0.6925390379419285	0.6954075071245652
1159559	0.09990088411720001	16.6593575369	2.69001748454	202.800214963	0.0	0.400245800901	0.0	0.3509081896543094	0.07377656493917985	16.952872262535998	2.990590100239	234.22992095371498	0.5566147040235621	0.5347044204792714
1159549	0.052146837736300015	1.7712669335299998	10.2728340256	18.4419872828	0.0	0.631086142322	0.0	0.7783858204881909	0.020362920692183026	2.0647816591659995	10.573406641299	49.87169327351499	0.6933165382336705	0.7448106251779251
1159635	0.0	0.0		0.0	0.0	1.0	0.0		0.09695782776885402	1.57454760260842	0.0457785840845	22.07235252858202	0.7111619080480409	0.1431726774054234
1159543	0.7829418013830001	0.233666636661		0.253835946467	0.0	0.910189982729	0.0		0.02210898610895336	54.68705864913101	0.0	113.689845482447	0.5719526735760639	0.0
1159633	0.0	0.0		0.0	0.0	1.0	0.0		0.2148705081221759	1.57454760260842	0.0457785840845	22.07235252858202	0.7113486487652203	0.14308011285384886
5294103	0.00934549369085	0.0		0.179124383154	0.0	0.0294117647059	0.0		0.02256239783086138	2.9306775270295566	1.986648552404901	29.46593786723701	0.21368312757223853	0.2142963996533072
1159739	7.63938758783e-05	2.02322721407	0.806105468315	12.7754497679	0.0	0.845097412967	0.0	0.8272537778515534	0.005484257320018956	12.053656314370999	13.023939722641998	63.359086018330004	0.4446774123092765	0.4614430721102049
1159649	0.0217494655909	6.04536871144	2.58312969538	100.86970074700001	0.0	0.715649899641	0.0	0.5772365193166342	0.02618224044330888	6.04536871144	2.58312969538	100.86970074700001	0.7499019223223554	0.6189952966687923
1159467	0.10032573732000001	0.617488686243	0.208915507093	2.56742088914	0.0	0.42006739049	0.0	0.20825363359690272	0.027504961437397658	3.101185593133	0.5837533827579999	8.88379391938	0.5850708103855239	0.3916955518043585
1159585	0.0323249237634	22.840995154	16.0551073402	235.99990019	0.0	0.6768404595199999	0.0	0.6762536420415528	0.03019792001232392	23.90225374455	20.24012381617	245.70936267148997	0.7264958902534115	0.6192668554558198
1159643	0.0749372017294	5.38515776668		37.2681580705	0.0	0.649452835308	0.0		0.05462077537731938	23.193116923979996	0.0	147.2818580465	0.6595189867523694	0.0
1159241	0.0018933264679	11.06592269	11.940109098599999	220.156372393	0.0	0.151783245784	0.0	0.09033028334901168	0.001026774637905692	61.48633810010461	72.89788088731211	360.09637491296655	0.17563877511208684	0.1617000096638746
5293671	0.07644797769999999	1.92680455694	2.02677403578	45.656346703800004	0.0	0.179317202519	0.0	0.1821354534579835	0.061795355804325186	2.67048666207	3.354435907298	48.713385584380006	0.4572349150557029	0.4657737638896437
5294075	0.051351196194699994	0.0004969799774700001	0.00347885984229	2.73387224571	0.0	0.144230769231	0.0	0.21841383948764934	0.015564730709805429	4.7016866003098094	8.579661709093621	189.22596974672317	0.11671495834817595	0.12661578481301256
5293559	0.0123312921561	0.0		9.249101120510002	0.0	0.0	0.0		0.05182727991402318	23.66040788935101	57.17434922922399	2011.8523116758	0.2447807088524709	0.2705991418050948
5293425	0.0376455436851	0.0371425004196	0.0463838386786	25.8880534414	0.0	0.111445783133	0.0	0.13606253684204964	0.02497561044935717	2.31018832684982	15.86598023815166	145.22703422675002	0.28145485303482776	0.3235593153523074
5293427	0.047704655006099994	0.010905946677700002	0.015103488774899997	4.8414523321699985	0.0	0.118701007839	0.0	0.16333318576578845	0.0241541515841469	2.2730458264302205	15.819596399473062	119.33898078535	0.4051881622216896	0.4600202517032148
1159551	0.0171057224466	19.535064453	8.932190631769998	82.4466977972	0.0	0.585216178522	0.0	0.5879548626488195	0.009236602475775294	42.376059606999995	24.98729797197	318.4465979872	0.6640352416037834	0.6639131892757126
1159539	0.395439793882	0.155742668561		0.291716722786	0.0	0.628659842895	0.0		0.2147621291607837	54.609134681031	0.0	113.727726258766	0.5736196319018976	0.0
1159579	0.0950775525153	1.674887045		9.99168164568	0.0	0.39412938159	0.0		0.03966744676203393	9.305340614264708	0.0	134.4181643298713	0.5351301007047263	0.0
1159427	0.5346957826150001	0.260718123842	0.202516768797	2.79549803038	0.0	0.708958617553	0.0	0.6356198845645016	0.2141024600328809	2.918619716502	0.86676345981	17.52325899241001	0.8014327700220977	0.6418903904962521
5294085	0.0179155197066	23.0379794486	49.066569101599995	1638.24028252	0.0	0.0559907165651	0.0	0.09216730025643068	0.0260137996252168	23.745939317807302	57.003160602784995	1948.4571289600888	0.3102864295706244	0.34334218142568
1159569	0.0646206511759	1.59713679351		259.49808065400003	0.0	0.244465832531	0.0		0.04115538110093223	6.4263418345027015	0.0	283.5308914164729	0.5090085151481225	0.0
1159733	0.30547757238699996	1.7415839932799997	0.255343784927	5.52288716362	0.0	0.692307692308	0.0	0.4431176162296523	0.4128027438220232	1.7415839932799997	0.255343784927	5.52288716362	0.8465098341690536	0.7251806545607195
1159493	0.24053399818100002	0.0639423104003	0.397370154969	10.634860896000001	0.0	0.441832429174	0.0	0.4386490473550964	0.04947450447428069	179.28425651440034	67.164047158769	301.31089102600004	0.6680150776868528	0.6090358786828188
1159677	0.011813848271600001	17.890159039100002	30.563002098000002	702.472165643	0.0	0.521507352941	0.0	0.5388126917107176	0.009515198316123227	18.499286781006997	30.70233637431901	739.4215597185	0.6890384554619772	0.6074026503185428
1159495	0.432670646469	1.1464339755500002	0.0916978566675	22.2544383358	0.0	0.612011439466	0.0	0.5044194060534734	0.3155234128124874	180.36674817955003	66.85837486046749	312.9304684658	0.6759694371703903	0.5938857329803304
1159663	0.029253152254699998	2.15860691777	1.92511071346	74.4771530022	0.0	0.519979038386	0.0	0.13758201402718648	0.013980551900252977	2.321259721399	1.9708892975445	76.73408862211	0.7252914609809257	0.2294803703073029
1166435	0.128501600264	1.28065080463	10.9723392653	43.8254537378	0.0	0.46850209986	0.0	0.5429996635338646	0.16695440437462153	17.610863512412003	31.626965682858	349.18886119662005	0.448476821192218	0.5166287722192232
1158047	0.0	0.00133061315864	0.00282755296212	0.00465714605525	0.0	0.5	0.0	0.7185339179326541	0.016124637116189958	8.061086521028638	8.108210708472122	131.49609432446525	0.13358494441435764	0.12541338444182884
1159477	0.275263379536	0.855327191864	0.494501552879	18.8478801675	0.0	0.419033862943	0.0	0.2926277762364621	0.074121611877752	42.52090536935272	5.15689354872324	127.11733951625	0.5893201500646598	0.2414717726311805
5293685	0.0523088361632	3.1524281296900005	2.8127296686900003	84.80485918939999	0.0	0.118783269962	0.0	0.10916278628394546	0.0420480846417905	4.01335329042047	4.04706521572703	87.69930189859402	0.3113465481887375	0.3000370974878947
5293647	0.00371235105036	5.48219977645e-05	0.00137054994411	8.949239162060001	0.0	0.003220611916260001	0.0	0.030896202903088737	0.00371235105036	0.6770124969437645	0.9227254387631101	84.75743456029001	0.07549773309679406	0.10580288864618337
1159517	0.023923167439599997	8.49432435073	1.37632690277	19.3548379345	0.0	0.8434940855320001	0.0	0.7321868862768341	0.028667598743209788	8.869981265395003	13.742887249309998	93.7618813409	0.8181120981654963	0.8010878669619981
1158049	0.0135635182232	0.0375898217317	0.0530581997009	2.49454310164	0.0	0.0734435797665	0.0	0.09512129970026674	0.008978966129391485	8.09867634276034	8.161268908173021	133.99063742610522	0.12784189870171764	0.12252071932821552
1166409	0.161771639507	9.09260738778	16.4422975612	16.4422975612	0.0	0.459073604061	0.0	0.8006176035788689	0.14395739377322958	10.4119258699624	27.488749875142197	60.368103128837994	0.4714914891085076	0.6697919279410649
1166601	0.169614323948	16.192007066600002	20.505638775999998	305.209518908	0.0	0.432254422281	0.0	0.4980220467043739	0.15808660709236938	18.039178196055	22.726770163576997	586.19989259082	0.5290424857325706	0.5871489763146691
1159445	0.652060481347	0.0935493903235	0.0935493903235	0.0935493903235	0.0	1.0	0.0	0.9999972437655564	0.20364938061235616	0.59775048162574	0.36018444824774004	0.7406111368327399	0.9710569105693008	0.9226134998169028
1159509	0.11994399490299999	0.0491407666996	0.0183770222575	0.253929082937	0.0	0.30222734255	0.0	0.18466614544749188	0.03510824348782912	0.1181757171944	0.2532284831465	0.875107530519	0.6750758202372973	0.6453955025111828
1159511	0.549856644418	0.206184564231	0.196724236317	0.963044619901	0.0	0.6163124641009999	0.0	0.6133121465222003	0.18349846889720609	0.27521951472580003	0.431575697206	1.5842230674829998	0.810984196526521	0.8243787794658116
1158607	0.181238399608	6.68083510148		9.70344634392	0.0	0.915816326531	0.0		0.07515991534393154	7.91270525965	0.0	20.398029811620003	0.646846208363264	0.0
1159593	0.0762731677747	12.390093009300001		99.17450752719999	0.0	0.421524663677	0.0		0.04143013279199841	20.01873592444	0.0	223.5889740522	0.5217727297237676	0.0
5294097	0.0174847871901	0.0	0.0009926130296660002	2.05556264301	0.0	0.00342465753425	0.0	0.024643523863387938	0.037402801071592606	3.39461433762	4.921092368159666	56.209046863409995	0.14111333263220144	0.14635278982039704
1160721	0.0594906139712	9.58907579225	16.0614829894	33.5976537732	0.0	0.120024125452	0.0	0.14613186915995496	0.03871197978796979	11.91908474785	18.569801631700003	55.825540187	0.3951132761154285	0.3627937824533259
1159483	0.586229401486	0.007022982659689999	0.005514691081770001	0.0200791316311	0.0	0.695214979196	0.0	0.6928781543907121	0.1463329250477921	180.3737711622097	66.86388955154925	312.9505475974311	0.6777738044927093	0.6031667753179508
1159485	0.8404297457850001	0.0014200995501600002	0.0014200995501600002	0.005680398200640001	0.0	0.974576271186	0.0	0.9724112559648872	0.2380841863070165	180.36816827910016	66.85979496001765	312.93614886400064	0.6845625892763336	0.6047787435362042
1159553	0.0063436937939000005	0.0	0.0	0.0	0.0	1.0	0.0	0.9999989750099779	0.03627479463547113	22.840995154	16.0551073402	235.99990019	0.6900508540878029	0.6894879831402099
1166513	0.130620495935	66.0524592873	74.4496701779	301.156500286	0.0	0.6251251251250001	0.0	0.6525982818429291	0.20909511272607376	142.57129391764	160.95976328023997	387.66659338834	0.9112822229662932	0.9225411636113748
1159723	0.385464240537	0.00147078906593	0.00286334467091	39.4784855263	0.0	0.214611872146	0.0	0.4170241037541901	0.17144577762770236	11.516105502050927	11.47915651575791	188.29596473333	0.3322006167015575	0.28157781165022755
5293631	0.0644064367811	0.0	0.00426618440542	10.657209938300001	0.0	0.0	0.0	0.03483748553672049	0.04774380170969123	1.9289376491427104	2.24234201069242	105.67034852200001	0.143725379853648	0.1599256755132184
1158075	0.0017219263179400002	0.0008755382150410001		7.5024101452	0.0	0.596122778675	0.0		0.1314738391507239	1.810665357714441	0.0	102.38921728149	0.23183834928067104	0.0
1159705	0.026001508227099998	5.72024505842	7.08138098975	68.2783317906	0.0	0.159185145123	0.0	0.20554710535334167	0.03374034035138769	17.639329806270002	25.65118262145	124.10387197760002	0.3242965367964349	0.3155942522653599
1166399	0.10807847840399999	0.982433508005	2.06197583443	2.06197583443	0.0	0.723322683706	0.0	0.9688070075819748	0.2189641598979804	10.075040895785	18.50427339563	18.50427339563	0.5467458130167823	0.8564192608323904
1159441	0.943002098132	0.0063540001865500005	0.0063540001865500005	0.0063540001865500005	0.0	1.0	0.0	0.9999999999988456	0.15657892837653384	1.7111780743827902	0.6799716083917899	15.219396203900788	0.8579059829061281	0.7296717527536952
1159567	0.252551477022	2.74063859857		21.1635260774	0.0	0.5466637592670001	0.0		0.06027942509784951	7.569843639562698	0.0	45.19633683987289	0.5798561151078471	0.0
1158601	0.0756886177132	3.01858817551		3.12880552512	0.0	0.556382978723	0.0		0.1347381709104266	16.307724522850418	0.0	16.418713881482013	0.6615984930030269	0.0
5293665	0.0300277726957	0.538891098913	0.7105889759990001	69.4520937943	0.0	0.0712166172107	0.0	0.09662389671826137	0.02639341778815944	3.4641900523517	2.6910190901507	98.12390366472799	0.14405263830343387	0.157238253281239
5294181	0.0706007782178	0.0		2.71638266598	0.0	0.0	0.0		0.0706007782178	3.3953333393113234	4.928855065830506	70.82714482379002	0.1253146853150402	0.13270339753106555
1159653	0.0175596235003	50.398013299700004		209.35289212599997	0.0	0.619022869023	0.0		0.00841949596810234	50.735672685498	0.0457785840845	220.72487111922	0.7974010973143627	0.19171826152596866
1159683	0.0	0.00161876653146	0.00115881764668	10.4222001751	0.0	0.767715692571	0.0	0.8082494692353421	0.007431630422979078	0.021540358131459998	0.01534651941348	10.4846643208835	0.6246405046849973	0.6241767829544038
1159487	0.474303163061	2.53280652492		4.84314494123	0.0	0.856476079347	0.0		0.0994352476957658	44.189717244298	4.65917887359	110.03664352363	0.6479315022040197	0.2128541207189748
5293697	0.0101308221487	0.0		24.9091613224	0.0	0.0	0.0		0.0101308221487	2.8489764556282	4.1027146915617	92.753280047898	0.1502451215997211	0.15515831731422414
1160749	0.0547888063276	0.00656236401846	0.004374909345640001	0.00833316065837	0.0	0.7875	0.0	0.5344060702179679	0.0036619416970512094	0.25099276091366	0.065758779302958	0.7919196975773699	0.3541894552611013	0.2553472841406364
1158605	0.298762749977	0.0		0.0	0.0	0.505050505051	0.0		0.035233615370192616	13.289136347340419	0.0	13.289908356362018	0.674252768927162	0.0
1157675	0.0175134845289	0.0276902553742		30.647247797600002	0.0	0.0135551447936	0.0		0.0175134845289	36.0911503396262	0.0	2239.48453847655	0.09352898640188698	0.0
1159455	0.343433290291	1.99250418667	1.71128862063	4.36195462081	0.0	0.645011600928	0.0	0.5152529256268683	0.0791273327644108	4.857486206958999	2.391377184853	12.227636007060001	0.6222030981067384	0.4801395717002433
1159741	0.005790508594140001	11.4461640526	50.6939382037	295.537050751	0.0	0.655223556649	0.0	0.39740423106953227	0.005646805523464369	17.081642604610998	56.446354954652	322.59495417633	0.6522643177577779	0.4165360090289936
1160735	0.062185977897	2.3300089556	2.5083186423	22.2278864138	0.0	0.489965685765	0.0	0.43750012585363984	0.04713798157262728	3.9109240116800006	3.90653956277	137.9288764558	0.4146485528646032	0.3669945054862576
5294077	0.17678052052299995	0.0		52.5717341182	0.0	0.07636363636360001	0.0	4.1762454330533736e-05	0.09091959068474972	23.66040788935101	57.17434922922399	2002.6032105552906	0.2451775004051577	0.27103778525104244
1159587	0.0584261374578	4.7984121228199985		23.989246224699997	0.0	0.5776	0.0		0.10875981463430094	12.167173471679998	2.58312969538	126.64225335709	0.6829244736332837	0.3928231579548877
1159589	0.10068028906500001	4.85943758035		4.87931016901	0.0	0.8221946801410001	0.0		0.05751930167310194	12.22819892921	2.58312969538	107.5323173014	0.7412017580442092	0.4566911045884692
5293643	0.0362001334026	1.08420974892	1.08673780836	35.037522872800004	0.0	0.100438276114	0.0	0.1044684068080912	0.02414747574749145	3.22414234522	4.49296022373	66.77515294380001	0.14866557471855535	0.1459535225576505
5293701	0.329659050587	0.00834457351084	0.0632865304615	0.0632865304615	0.0	0.623529411765	0.0	0.8359359586423263	0.49670833126412506	0.8050187032313699	1.17839327785303	2.838500440010029	0.5553592461721276	0.5415957732981638
1160753	0.280490112955	0.0601029212485	0.034478452224	0.575658061352	0.0	0.291610587707	0.0	0.14888385898523132	0.07855264468579426	0.2444303968952	0.061383869957317996	0.783586536919	0.3464707192158749	0.2503762970806973
1157305	0.0259188508099	1.28061656025	1.26736629044	99.5091203637	0.0	0.0412629659182	0.0	0.051297377217542565	0.0259188508099	1.888052837892	1.7881384741470001	122.5323562545	0.07371074697228422	0.07516103013619976
1159471	0.162324614156	0.0230826329789	0.0146739595366	0.858919657992	0.0	0.348062953995	0.0	0.2870277312276561	0.04253315351630458	59.4526600996779	9.5119904042546	130.688270430002	0.5797093348240763	0.3860746240534607
1159679	0.0121674592714	0.609127741907	0.139334276319	36.9493940755	0.0	0.7024522108519999	0.0	0.5232792423774538	0.009103183642304705	0.6107465084384599	0.14049309396568	47.4048008559525	0.6775988869014785	0.57172832131949
1159505	0.338003456146	79.9883696333	49.28588505	110.926139726	0.0	0.721475461082	0.0	0.5305147171458603	0.04117698667539579	88.69232530993997	52.808077729109996	147.3894681953	0.8084656084654538	0.7247464684717411
1159479	0.20110905015	59.0482923533	9.19206575616	128.28004241600001	0.0	0.61348097503	0.0	0.3694649589100573	0.06510875433877722	239.41646063240017	76.05186071617766	441.2161912800008	0.6618752816718206	0.5296730179276881
1159481	0.138457786841	0.381285113399	0.305250688558	1.54930835601	0.0	0.553918044572	0.0	0.525228154289933	0.09662637101954492	59.43099756624916	9.49873654426816	129.83503117021064	0.6212494139710865	0.4240457635815355
1158043	0.0026495797054	0.00040665641427	0.00013811771350400002	1.0740115668	0.0	0.36546184739	0.0	0.3832251233815034	0.005169748139013589	0.6354268593272699	0.3509285257024041	48.80265060627	0.28698277393022165	0.21017257035778675
1159657	0.0022038709693200003	0.5345665870699999	0.0	1.82772953424	0.0	0.923526580015	0.0	0.18051853869153744	0.027706276477402	11.98073063967	50.6939382037	297.36478028524	0.6933034213757255	0.38198928899324747
1165309	0.0962796127036	4.512862978399999	0.00108550729055	83.987373807	0.0	0.382646843773	0.0	0.02790024550267472	0.0664552346596854	5.684077595956	0.00108550729055	96.57632532868999	0.22391120224685154	0.02720264303285009
5293613	0.22841997245200002	0.198953709274	0.879387860332	90.690947849	0.0	0.331072995612	0.0	0.4025234760003332	0.11115968909605398	2.4301598232703	3.155988907547	108.31973200589	0.5575091575089198	0.6237133713766758
1157303	0.0	0.00950030500826	0.0130801300838	0.668266929235	0.0	0.249221183801	0.0	0.3364108592410972	0.01378516182196775	0.85993615752526	0.7655647280258001	17.405441890635	0.12884538553782654	0.12915022625842654
1159601	0.0	1.3233926374200002		1.78330638539	0.0	0.903557312253	0.0		0.08111495137896806	7.3687613488600014	2.58312969538	102.65300713239002	0.7248182361674952	0.5490721239321611
1159583	0.018247490113099996	55.5181296273	0.108406149287	166.062723761	0.0	0.686057395495	0.0	0.31095561051708936	0.020410159111407943	56.579388217849996	4.2934226252570005	175.77218624249	0.7292571173612236	0.31044063414412104
1159555	0.701431983963	0.038285861956		0.106504306896	0.0	0.802694898941	0.0		0.0680778084260638	54.046399143019	0.0	113.00405271625598	0.5423969450699753	0.0
1159743	0.0	0.0	0.0	0.0	0.0	1.0	0.0	0.9999999999417925	0.0018931519999247047	52.7504243657046	63.466090431012105	162.16788893376662	0.34590640240731024	0.3394940647453081
1158039	0.0	0.00013811771350400002	0.00234800112958	0.0189221267501	0.0	0.411764705882	0.0	0.4896664179657176	0.005259062391784693	0.635564977040774	0.3532765268319841	48.821572733020105	0.29204293746822185	0.22150661972406507
1166491	0.147622902072	0.7582901924619999	1.0355041610299998	259.498217948	0.0	0.63695976155	0.0	0.6865995098166765	0.15486054986114106	1.4273916553942	6.6723531122572	285.6477318829272	0.7294260552689021	0.7974452005953753
1166335	0.232500964165	0.492414506152		1.34921574686	0.0	0.268370607029	0.0		0.22272938139004544	1.171214617556	0.0	12.58895152169	0.1883797054011457	0.027046491208862617
1159167	0.0177371826645	1.85909340215		7.23995570854	0.0	0.486825053996	0.0		0.015553690652224504	2.517655487829	0.0	24.24006834494	0.30170968823358635	0.0
1159745	0.308118371002	35.0730442094	37.7751155295	38.017605341999996	0.0	0.8552036199099999	0.0	0.9032604783493832	0.30765433731073194	52.7504243657046	63.466090431012105	162.16788893376662	0.3458724640688267	0.3394597936959024
5293573	0.165672881629	0.00523579792934	0.00585177415633	0.0126275126531	0.0	0.414634146341	0.0	0.4661767604697074	0.01682467729694904	2.32231606704334	4.16784077428833	178.3426468766531	0.1944604068493624	0.22309805520756007
5293499	0.377663920928	1.45799145438	2.89674059474	4.7556927274800005	0.0	0.600501253133	0.0	0.6520862038717065	0.08753748929432734	16.96901473873	21.4312081807	463.30452689448	0.37379520946634864	0.4276602423647795
1160617	0.0932419463135	0.103406750131	0.023583995644	0.268041181262	0.0	0.454935622318	0.0	0.1045782825399927	0.10992441182919636	0.9152209785247	0.7674751726156999	82.3491795106357	0.3268267101733397	0.26856492937552817
1159607	0.021793097505900003	2.2009351467400005	6.32777162967	12.6118296697	0.0	0.6933066933069999	0.0	0.7747466998794407	0.008529563522738759	24.366548118239997	11.44082348786	102.53460477280001	0.7501283697049864	0.7474564186938881
5293645	0.0	0.000328931986587	0.000493397979881	0.012115661506	0.0	0.16161616161599998	0.0	0.07739489503984041	0.018523198219188186	2.9306775270295566	1.986648552404901	29.286813484083005	0.21898814563951668	0.22046581336051504
1159699	0.43802386558399997	0.0380503500346	0.0397922800621	0.0464116141666	0.0	0.815384615385	0.0	0.8566548068587273	0.020262516186907897	17.677380156304594	25.690974901512106	124.15028359176662	0.3277270284792137	0.3193738262630567
1159541	0.018194733661400002	0.188204930164	0.17915661621399998	0.251543127815	0.0	0.961303462322	0.0	0.9688425258031088	0.08096254271336155	23.134509879636003	16.355679955899	267.42960618071504	0.6954089576016182	0.6961294766010597
5293609	0.0382605812125	0.161949338661		34.9463211889	0.0	0.0203327171904	0.0		0.035061949799498685	2.9010931565319997	2.52263324128	123.31098768459	0.2663548038864214	0.2821890647655853
1159497	0.09732778906189997	4.11668403899		11.746933231099998	0.0	0.559001040583	0.0		0.033611195134797565	33.045351128368004	2.46317706141	90.9096596413	0.5987982623522087	0.1863062646210314
5293605	0.041777689952	2.27605999714	5.75269514752	244.222957418	0.0	0.067264573991	0.0	0.09418709137248504	0.04160113909020564	4.7062198204103005	8.908684055066997	352.54268942389	0.3697342252755601	0.4208926474228016
5293627	0.0150203247909	0.0321146724455	0.0295062429796	5.08419202401	0.0	0.107257546564	0.0	0.1025907865153225	0.01655948387356935	3.2562570176655	4.5224664667095995	71.85934496781	0.14326407506736208	0.14029703964730328
1158077	0.146528465963	3.26470819348		87.08564389909998	0.0	0.235988753515	0.0		0.04996714633636617	5.075373551194441	0.0	189.47486118058998	0.2327593378253073	0.0
1159429	0.6085573398390001	0.16126530704800002	0.0457849328814	0.245541997661	0.0	0.797270955166	0.0	0.7247998102745999	0.10767360792568287	1.85620306621	0.7095162260524001	15.448697886340998	0.8293453176243822	0.6891047639036326
1165063	0.167312566234	2.6674501095	2.94389118813	96.33633253040001	0.0	0.233038567288	0.0	0.31003610467735165	0.12944542728416608	6.5129584792349995	12.105450083420001	150.81161562258998	0.2618414947907732	0.42017859026066495
1150341	0.000803440538072	0.000975341405137		0.788842924201	0.0	0.006389776357830001	0.0		0.0008034405380720001	49.306131210955144	12.101159713344	124.468866564501	0.4263359905522291	0.24278076553299965
1166503	0.24153042185899998	36.4950844141	42.0768943091	86.18019859700001	0.0	0.914149772445	0.0	0.9722043307193476	0.15103853672847758	179.06637833174	203.03665758933997	473.84679198534	0.9122870605291834	0.9399439725856368
5293389	0.012473322581400001	0.0066333836221000005	0.6496265652750001	24.7128457131	0.0	0.0117963576159	0.0	0.0718941181235144	0.012473322581400001	0.0947003093534	0.7372453368953	52.10344328292	0.0941309895096164	0.12215796927320766
1159475	0.41331619970600003	3.01398061868	1.71930196072	28.947602458000002	0.0	0.584652345958	0.0	0.13410933273066314	0.1878310541394146	44.67955879616872	6.3816939565642405	137.21706180675	0.6243274535175078	0.2047473401854757
1165307	0.0399475892179	0.707474106632	2.8987386405400004	4.95960848889	0.0	0.327948661208	0.0	0.7744741781294755	0.07921008896062459	5.2229733170233485	2.9024603798219	88.94961852788134	0.3590245024732009	0.4239415067600126
5293575	0.0627717924868	0.0552838663716	1.6894896103	50.527835332799995	0.0	0.0929772502473	0.0	0.10432481921817292	0.05236005577960217	2.3723641354856	5.851478610432	228.8578546968	0.16062544420725114	0.1835930863871717
1165093	0.030097863353300006	0.00263623199135	0.00263623199135	0.00263623199135	0.0	0.971830985915	0.0	1.0000000000030334	0.03979522962391599	4.51549921039135	0.0037217392819	83.99001003899134	0.3926689027313329	0.04443572287917818
5292673	0.0163645173848	0.07247260026630001	0.100656389259	18.495509061099998	0.0	0.217238346526	0.0	0.27055547027771765	0.015172794965902915	3.23805991941524	2.4780948053683005	41.213924345015705	0.3272073511783484	0.2611149685936984
1166617	0.24700264406999997	0.0221748792683	0.016767111345	3.56031994362	0.0	0.635658914729	0.0	0.5611763858420511	0.025466183790680108	41.7294261213344	122.635358738305	2166.5291826672	0.18499933975976832	0.20924337963926504
1166475	0.0470356729811	2.25563356336	84.6636236866	1037.96446213	0.0	0.187982268921	0.0	0.23781967107311985	0.0470356729811	3.176855648639	85.88384385675701	1317.9539245954	0.3692568917297202	0.4188893987829364
1166417	0.026210172592199998	0.015144466306100004	1.85330799466	1.85694266658	0.0	0.714285714286	0.0	0.8254270579257618	0.036887937278203185	21.423714015995106	32.0302767238	1307.7901161905802	0.22386643900608896	0.2520077365948068
1166393	0.126056231489	0.245223042148	1.5153605523500002	15.4698226464	0.0	0.118575601268	0.0	0.21978848727254927	0.08855311043193831	10.322355308223152	20.02172531827015	33.976187412320144	0.21593966179878696	0.3643517583613101
1165077	0.052142031947400004	0.265403213009	0.35958985076300004	40.2157625137	0.0	0.0677368539494	0.0	0.05927959990167614	0.05214203194740001	5.48837653003235	3.2620502305849004	129.1653810415813	0.18270977115868994	0.20321376064992888
1165125	0.0902733329634	0.0731353400624		0.209167072579	0.0	0.27042483660100003	0.0		0.028577575140717508	0.9953629547964	0.0	252.331639092579	0.14637528691660134	0.0
1166347	0.0634925207478	0.922227614734		252.12247202	0.0	0.138663145063	0.0		0.05275645129661762	2.8138215753640003	1.84566345388	434.571549718	0.11996192998450585	0.13269611835174122
1164821	0.0	0.00181086931843		24.96882011	0.0	0.0010928961748599998	0.0		0.0	0.18422494994543	0.31050971109700004	69.2523560716	0.05493867010975149	0.0524375117816253
1164827	0.007137695591890002	0.0100154997781	0.005633718625180001	31.367333976799998	0.0	0.00499375780275	0.0	0.0025547633858826165	0.007137695591890002	1.0415831184071	0.8065209136111801	57.00302885764	0.09682771436152922	0.0743085354716048
1164999	0.07525534033510001	0.113674999739	0.102307499765	0.122768999718	0.0	0.890697674419	0.0	0.8396461983799459	0.08118685650876485	1.612350635989	1.796532260255	5.859436360158	0.367627706663455	0.3958099531092548
1165261	0.0717751105088	0.117488954755	0.0796646764065	14.889408142999999	0.0	0.12964705882400002	0.0	0.08947159268658895	0.05419919640483767	0.44513508178390004	0.3363624910997	31.256630278427	0.12974225311317347	0.10446784562162753
1166375	0.289286128105	0.07034749975810001	0.7710298028810001	1.00532770949	0.0	0.261479346782	0.0	0.6605898143932626	0.2666398887023903	1.3944158867581	12.223065372081	18.69912087069	0.3670987474515117	0.6672667193881675
1164695	0.007807249412399998	0.233017190796	0.215161726162	12.8865523679	0.0	0.11658167750999998	0.0	0.1391231023509209	0.007995288260657415	0.7396247333779999	0.7518918367490001	38.8506483377	0.11284508714653026	0.11445092231277113
1164941	0.003556305165760001	1.8475094481	1.35109864504	46.337689760699995	0.0	0.057017290232999986	0.0	0.03800222294703017	0.003556305165760001	3.412101185797	1.68210411144341	70.39660159709999	0.10334572490703917	0.07191767668598754
1166463	0.170589373345	0.12825325859		8.04713528854	0.0	0.238787503866	0.0		0.16931017992105885	1.648235431207	2.28655125861178	55.50008360843	0.2233621127477236	0.1205296586220483
1164721	0.0127010611845	0.0	0.0	0.0	0.0	0.158200290276	0.0	0.0930301288198261	0.0039863905459045605	3.5369908766800005	2.80592831966	50.024301023999996	0.12759073021460546	0.08989956849359522
1165247	0.0466982119574	3.5369908766800005	2.80592831966	50.024301023999996	0.0	0.124549343845	0.0	0.08958851392481575	0.04803371265831334	10.41053070932	5.06850150365	115.00609251709999	0.14484978540781712	0.1094887406540693
1164881	0.0942754314143	1.34147200233	0.986981568378	75.3199657549	0.0	0.1125	0.0	0.0924570608313432	0.06042636274504834	9.93834900197	6.948951291968001	549.0990068869	0.14431604407439938	0.12595816130254933
1164913	0.0073433806436000015	6.35453179711e-05	6.35453179711e-05	0.00057190786174	0.0	0.171387421988	0.0	0.1408346682703411	0.028877065325551905	0.4720177314739711	0.5574822722269711	63.39485842490622	0.11108493344306997	0.13052772499343995
1164985	0.209910494993	1.25584812544	2.24315977941	33.9059909791	0.0	0.23887915937	0.0	0.4001474410957984	0.16136359747069687	21.31588271944	20.13812645151	316.7755854061	0.1775732730022705	0.25816423480295225
1164819	0.0856866768747	0.0		0.0336636875873	0.0	0.0181818181818	0.0		0.010381344848391896	7.881897021926119	0.0	79.0650491525234	0.08346456692911615	0.0
1164651	0.0186575298763	0.0055993083515200005	0.011707644735000002	0.0457191313035	0.0	0.27731092437	0.0	0.3747352509932497	0.0044242600612697455	5.847138844386518	6.784440516425001	19.517417404373496	0.2135967230444834	0.1444927916874906
1166353	0.19087837349700001	0.145973253151	0.384563027008	0.509930477041	0.0	0.31667543398200004	0.0	0.8493680732762877	0.13508387076243272	3.322951079931	18.086373722488002	55.71120042814101	0.2706967569762495	0.6445391807726173
1166359	0.328733197389	0.48082939403	7.08260161238	16.8875275083	0.0	0.410888983411	0.0	0.6803986387348809	0.20464253739708285	3.1769778267799995	17.70181069548	55.201269951099995	0.2649973917579441	0.6191492665414308
1165311	0.09627056287039999	9.7770638314	6.29254484951	192.356450868	0.0	0.2178541631900001	0.0	0.18815854678185728	0.09661183220463307	10.329795816688	6.29254484951	201.02259946747003	0.21433893897073714	0.16475522272017162
1164829	0.0119545344291	0.0527186050895		1.56835688936	0.0	0.08953613807980003	0.0		0.014574409823654396	8.367329007178897	0.159612699659	126.53131123063608	0.09778420038532376	0.039595944579847726
1165115	0.014445709027200004	0.0		6.25485304595	0.0	0.0206968823684	0.0		0.014445709027200004	1.057362680556	0.0	8.74038281004	0.18093994778078068	0.0
1165257	0.0907168919713	53.045031046999995	66.3625138942	590.1092816319999	0.0	0.13862801715700002	0.0	0.13536508375193784	0.07081431501618557	62.367446872209996	82.80384724506001	694.0301193592	0.1683081252199604	0.1814481202661921
1166447	0.08600195643650001	20.3356406455	36.2879077628	871.290078067	0.0	0.212080430652	0.0	0.28257782278689736	0.06732477761531436	22.12794637706	47.813069592828995	916.26234457206	0.3129269713496867	0.3841477358915559
1164779	0.0	0.0		1.56862578017	0.0	0.0	0.0		0.0	0.3288114542957	0.27002478738705	19.4927348202995	0.1116432524477085	0.09626200969843808
1166403	0.09490960664789999	10.3328253642		84.409040428	0.0	0.140415303465	0.0		0.14526885280691368	11.779961413185001	0.0	165.97402053620002	0.17758551036867884	0.0
1166337	0.08917424097210001	0.0		1.14555356122	0.0	0.017441860465099997	0.0		0.139294189000201	0.113851937	0.0	11.24897531882	0.14542852424739872	0.027289160778249118
1164917	0.0679109218164	0.0326403235304	0.06636450395309999	8.10416652919	0.0	0.138775510204	0.0	0.3430086796889497	0.05816950926329584	8.6704487470904	13.763356039353097	90.53176318399001	0.2176231589636753	0.2729490640389321
1164773	0.0137249777582	0.112237738213	0.121043525869	0.177186483052	0.0	0.632653061224	0.0	0.6855890752937126	0.008184195384084795	0.8837230687069	0.7773899360617	39.948631190959	0.14452636429456964	0.1211070185302678
1166329	0.0787018021832	1.06032602672		37.701713911599995	0.0	0.101556101556	0.0		0.06901989437893682	2.0826827945969	0.0	290.0730279240343	0.14011264562917444	0.0
1164673	0.0149599218135	5.2281737921	4.28228072601	10.6999754224	0.0	0.204333333333	0.0	0.2025331706630704	0.006142366446194643	5.841539536035	6.7727328716900015	19.47169827307	0.21309182926025644	0.14266826930236806
1164929	0.0177953155022	0.15015052323	0.00484757855884	17.497026085599998	0.0	0.0480815156822	0.0	0.0056136271274648646	0.0177953155022	1.1757378365100002	1.11385588271884	205.6563423666	0.12468417425943347	0.1117962466115445
1164953	0.0757055877427	0.0	0.0	0.00239232054446	0.0	0.08659144581469999	0.0	0.11817943250981268	0.058003239741493226	0.471954186156	0.557418726909	63.394286517044456	0.10265189660929423	0.12908634447341408
1165083	0.0208125568877	0.352878276295	2.6272995317200003	46.5589251658	0.0	0.168645325419	0.0	0.4110720223054998	0.021039181956055347	91.909031639675	255.41719127882004	965.3394489534004	0.19201274185947945	0.3729525383939437
1166331	0.180245094705	0.0		3.03240692476	0.0	0.0	0.0		0.180245094705	0.0	0.0	4.647366080349	0.04045893719808985	0.0
1164845	0.0485942628271	1.82107995921	1.65521381208	110.455197669	0.0	0.107744107744	0.0	0.10472681482468696	0.03953862020307135	6.202007382304	7.640537181872999	329.4042613263	0.13658201784462912	0.12858730203123986
1165413	0.0264002634005	0.0		37.893803051599996	0.0	0.0	0.0		0.0264002634005	72.4217979961	76.1688414657	1918.5779622716	0.051210703925174	0.03675024762044595
1165007	0.212318198178	0.0	0.0	0.0636313650757	0.0	0.0294186591655	0.0	0.000595677057163787	0.212318198178	2.852680004089	3.135579913273	98.0562534508457	0.13924304118532155	0.19208018960582512
1164837	0.185426885757	0.0120681144181		0.034298851504	0.0	0.363636363636	0.0		0.0223941484444576	8.304447779421599	0.159612699659	109.56056917007608	0.09963099630992804	0.04517612205655548
1166389	0.26885974312800004	0.658790874702		4.479263196580001	0.0	0.246890547264	0.0		0.10846013765236208	12.455217575002	38.510692894499996	345.29203823157997	0.1985859588193523	0.1837380861138664
1165417	0.0216923901785	0.0		103.46032700100001	0.0	0.0	0.0		0.0216923901785	0.208333764691	0.0	123.05795847570002	0.043518154410793534	0.0
1165019	0.17684862532600001	1.49867563625	1.69422476049	5.73666736044	0.0	0.33926094085	0.0	0.3717401352928345	0.17162250826102968	2.57743260625	3.03985913575	18.46885211074	0.3813196948100347	0.4574979827448704
1165299	0.19760241989900001	9.82729188859	7.72654543852	162.409850044	0.0	0.29733001975400003	0.0	0.3684224335433035	0.20645810419481506	12.49474199809	10.67043662665	258.7461825744	0.26765008576309224	0.3414685801110869
1166443	0.16377971125600002	0.542248402722	0.580959046143	350.950602227	0.0	0.294781382228	0.0	0.32450427341443683	0.11619066380984605	20.877889048222002	36.86886680894301	1222.240680294	0.22399891591537505	0.2886200722946402
1166459	0.519559668536	0.0005265024956319999		0.0005265024956319999	0.0	0.950819672131	0.0		0.17033617006730892	10.678569014454633	18.63989244151178	628.0327388717756	0.19286186384692064	0.2575857554221493
1164859	0.44042122489200003	0.0674445963523	0.066399430536	0.158218248078	0.0	0.436842105263	0.0	0.4316096177936217	0.05967782717052862	8.9802062850423	5.906342418344001	361.09790885397797	0.14226322683543186	0.10728553149094423
1164989	0.117595859007	0.0377603059751	0.0309666789835	19.6052499587	0.0	0.22298836791	0.0	0.1922348685879354	0.09458970718142454	1.6501109419641	1.8274989392385	25.464686318858	0.2712785078085553	0.26020164302232085
1164927	0.0990247025007	7.57128968636	4.852961419430001	285.619724851	0.0	0.153922185282	0.0	0.1100627873556582	0.04953155168771349	8.59687699964	5.9619697235899975	473.779041132	0.15072650952561836	0.13270814086148786
1164919	0.0	1.10247051716	2.50550685602	7.24627829366	0.0	0.22641509434	0.0	0.35481748758569304	0.035410623102095674	13.323839324896	69.02298966109001	792.1238874790599	0.17170846394988784	0.183005811466075
1164949	0.00114722669941	0.0380103370117	0.0363209887	9.71422725066	0.0	0.0151260504202	0.0	0.014158873646658063	0.00114722669941	0.5230420786247001	0.588543198421	217.45348201366002	0.048943822082598176	0.0514686707772641
1165343	0.036810500619099996	0.0		2.63441327144	0.0	0.0134453781513	0.0		0.009171001989991271	7.881897021926119	0.0	81.69946242396341	0.07934782608694219	0.0
1165135	0.0808399552197	0.0		0.0	0.0	0.829896907216	0.0		0.017656998920330142	1.171214617556	0.0	12.58895152169	0.1950982509178852	0.02676323601049729
1165223	0.00400699080117	0.716214075452	0.247635340027	6.36924149648	0.0	0.08688049833339999	0.0	0.04223469928223585	0.00400699080117	6.043060387152	5.316667828127001	70.94911995408	0.1111699641689256	0.07003045181922295
1166381	0.07587358482800001	0.415512564789		65.9928747838	0.0	0.100189513582	0.0		0.07587358482800001	12.870730139791	38.510692894499996	411.28491301538	0.14984039556882692	0.0927143049539958
1165255	0.00335370390569	0.0		66.75206069869999	0.0	0.0	0.0		0.00335370390569	7.878266414107919	0.0	136.42288498386336	0.06481064021639425	0.0
1164795	0.00255804015662	0.0		1.2921508202	0.0	0.0	0.0		0.00255804015662	4.39148293232	3.36523900341	158.9957478872	0.09880132212990962	0.06357942722625716
1165131	0.075863308718	0.0338609912433	0.0139266980113	8.80203310121	0.0	0.0403171007928	0.0	0.029660012555881493	0.075863308718	0.2543600568023	0.5924294839493001	9.537268751113	0.12159245343352675	0.2355147213094677
1166357	0.202462827071	0.373889290349	1.91706543138	4.66996655606	0.0	0.0529581209838	0.0	0.2642550400082665	0.202462827071	3.070037723099	12.536274514479999	42.983708998859996	0.16246422243425326	0.4670765500489888
1166589	0.502975575096	0.0		0.0	0.0	0.181657223796	0.0		0.2744136122260437	0.159769436577	0.0	1.3238632889700002	0.15091984587822066	0.0
1164957	0.0007643223070850001	0.0015136942965899998	0.0	1.23463443643	0.0	0.00099860195726	0.0	0.000417752609588737	0.0007643223070850001	0.00817394920159	0.00121095543727	28.82496536643	0.04935901405831726	0.04217021560517855
1164833	0.013922943168299999	0.0	0.0126300947741	197.92353237700002	0.0	0.0	0.0	0.01237345038443742	0.013922943168299999	0.16273572714999	0.31294993800038	301.763692077391	0.0803413772809798	0.11342933574533585
1165347	0.125051114365	0.0	0.0221026658546	16.2380184017	0.0	0.029484029484	0.0	0.22794534196707475	0.032361249600039464	0.16273572714999	0.30031984322628	103.84015970039101	0.10051546391780904	0.13880492993389726
1164637	0.0	0.0		0.06868223985659999	0.0	0.0	0.0		0.0	0.0	0.0	0.1406320295428	0.05573690223596479	0.04453436406278704
1164713	0.00432853140596	0.0	0.0	0.0	0.0	0.0124472104912	0.0	0.0065511344070535325	0.00432853140596	0.0426595877288	0.0293720913687	8.552478975580001	0.05315614617940941	0.06318132767751497
1164885	0.170525859789	3.75257620361	5.42752292042	168.367520095	0.0	0.29576473899	0.0	0.2834954708598563	0.15811066261960824	4.3809274230940005	5.985323369793003	218.9490636573	0.14709206574709627	0.1372833158076197
1165091	0.0198850829373	0.16936044648200002	0.108934293145	73.39184907479999	0.0	0.0665815783876	0.0	0.04054255676985378	0.0198850829373	4.68485965687335	0.1126560324269	157.38185911379136	0.14105159490074448	0.04143165647660653
1164787	0.026566570953599995	0.576790122417	0.689986831247	51.6145047083	0.0	0.0877228731533	0.0	0.10965779823191106	0.02123955646920874	2.9818019899070003	3.4088513286369997	84.8375112608	0.11646185355847236	0.1123754888388764
1165279	0.0282577938552	2.4050118674900003	2.71886449739	33.2230065525	0.0	0.126107026842	0.0	0.11328758093350336	0.023247346043364616	5.24086781169	4.2762208905699985	371.38048813949996	0.1609125607218651	0.1683733491045855
1166423	0.0369571578309	20.4097234451	94.71170647299999	940.290427918	0.0	0.161140952028	0.0	0.2000734643115872	0.02949186472268629	41.8334374610951	126.7419831968	2248.080544108581	0.20262216924919152	0.2344183045606117
1165037	0.057256024918	0.124680101639	0.121416224632	6.202312264500001	0.0	0.130329488242	0.0	0.1401303706102141	0.05744360112133241	0.5111418547084	1.1797010902416	18.022259231034	0.14001598153243766	0.17881594932042713
1165111	0.0124136056065	4.92001467568	24.191577365500002	86.9865694646	0.0	0.152328334649	0.0	0.16944752902259605	0.01853293460135021	5.915377630476401	24.191577365500002	339.318208557179	0.1470186812249652	0.018313573255278444
1166613	0.029111532315700007	0.00437892065383		0.0342017979128	0.0	0.169708029197	0.0		0.02858878178825769	1.59367860803173	11.674696324473	45.64797034906279	0.41097478504529467	0.6008754948868077
1164755	0.131542766931	0.075879069409	0.00183758846833	5.0952147536300005	0.0	0.162188568637	0.0	0.003663902445778261	0.03406942345422465	0.4758510570826999	0.31492821645243	7.370586201052	0.2009844134536017	0.12823777747160614
1164905	0.0445236243207	0.487337477003	0.159612699659	59.68132315689999	0.0	0.0950330175136	0.0	0.0826023925688124	0.026455885232495032	19.345307318563002	80.227791534479	875.8140740739598	0.15083938862432464	0.161435508750458
1165029	0.339729131489	1.07875697	1.34563437526	12.7321847503	0.0	0.464732366183	0.0	0.6275765151228576	0.2314471214809153	2.40504294177	2.59109866593	77.64071424170002	0.2591240875914165	0.30623782921305953
1164853	0.244644270042	17.8895917769	17.8794905628	133.908016029	0.0	0.3667752443	0.0	0.350892804802787	0.09941979385387008	18.850597411839	18.725913080654003	189.38417780340998	0.17001891009069556	0.15511613893762202
1164887	0.395537889591	0.332654415455	0.288622068481	4.894618212109999	0.0	0.522764227642	0.0	0.470591413662574	0.3512083764794756	0.961005634939	0.846422517854	55.47616177441	0.15905626134255466	0.1442080742514867
1164893	0.00813340295241	2.0543109963	1.8635317685	48.4515614798	0.0	0.19220430107500008	0.0	0.17558853544970007	0.017270629812985813	38.17468070347	107.55534366629999	851.0898413625999	0.17293076522641945	0.19631521294920407
1164751	0.022003110763500002	4.72400033757	5.32796964294	835.724747502	0.0	0.110136024572	0.0	0.11706516985897847	0.01802097515043979	5.526584919433999	6.1128641958805	864.7026376038119	0.1393399880809821	0.13845770655575354
1164891	0.033048234265200004	0.0709165748558	0.0689466699987	4.45084917554	0.0	0.107220904822	0.0	0.10792427628023177	0.03195327352349677	0.0709801201737711	0.0690102153166711	4.4538134039462	0.11052710617235036	0.11438979644279855
1165351	0.157377448686	0.0	0.027891459292700004	3.36263786291	0.0	0.0511508951407	0.0	0.2999154578614605	0.0492961632118679	0.16273572714999	0.276112161576	87.473202459037	0.10467532467562618	0.1336248469498895
1165387	0.110670123146	0.00618851731997	0.00353629561141	8.810432467839998	0.0	0.196105702364	0.0	0.15893478296949093	0.03174788473876451	8.65152223146397	8.59434831800641	68.04483399604	0.12989613314971835	0.12525616622746735
1164925	0.017536287521799997	0.236113075982	0.128771175805	22.6270545642	0.0	0.0947038872945	0.0	0.07869296145320452	0.028833531359998	9.901181839584	10.833971801805001	93.14039250729999	0.1741642273919568	0.2442990143295052
1166585	0.112940357225	1.89159396063	1.84566345388	182.449077698	0.0	0.107107945818	0.0	0.2239026948811743	0.10963272594742447	5.43632773845	20.464862371686	239.16985787289002	0.16424556852594	0.3840917473745749
1165233	0.00708313549517	1.62652785156	1.6014022247400002	63.7045521273	0.0	0.0905086103324	0.0	0.08658685955512245	0.005154186021110153	3.541551915549	3.118473179206	95.4416186592	0.1086247610480106	0.08590663253229126
1164799	0.010994436633399999	0.0	0.0	115.31796898399999	0.0	0.00389583760509	0.0	0.002473073262828407	0.010994436633399999	0.8396742795009999	0.7301165045069999	122.66742993417898	0.10948517704144524	0.10059086009964456
1164659	0.000647126676428	0.386881530663	0.803527802404	37.8436940663	0.0	0.0752169091265	0.0	0.051645110756803086	0.000647126676428	1.2297656175900002	1.6284805025133002	77.295389773244	0.10075668066071036	0.09252084536370504
1165357	0.0202279854837	0.00017794246377900004		14.7646641197	0.0	0.0180701120347	0.0		0.009982314220331356	1.5048433156137788	0.0917177964002	33.4904537101	0.07209144859998841	0.04684358258232335
1164923	0.0115073179495	1.50466537315	0.0917177964002	18.725789590399998	0.0	0.0787824529991	0.0	0.05264556078309724	0.011201356812009443	1.883805016356	0.5060348695842001	28.276676499336	0.14436328709599286	0.1404805168289011
1166367	0.0686866410546	0.0338235512609		1.44216672005	0.0	0.13880126183	0.0		0.03165648334187915	1.5892996873779	11.674696324473	45.61376855114999	0.424461899418942	0.6344651889802455
1164729	0.00115641594312	0.0197059880229	0.0228956408901	10.2073808972	0.0	0.241379310345	0.0	0.1815680534376512	0.02590947471966221	64.94321561552289	73.97350673703009	1048.3931101602	0.13942824389216474	0.1287022279145363
1165031	0.0555025222453	2.677019191	2.79613098945	52.4978832591	0.0	0.106086156676	0.0	0.115112481275051	0.0289721273822423	3.500718713287	3.557343359426	57.27088578044	0.15033432392234505	0.15484038506835748
1164961	0.009683574404309999	0.0546832648106	0.000262031273451	14.8829048665	0.0	0.058840413318	0.0	0.0004564559118174028	0.009683574404309999	9.9332022673602	7.76807739536195	178.260071222779	0.2236633139226292	0.2403928201406597
1164685	0.0148753812085	0.145611164597	1.6917344148700002	117.589665115	0.0	0.0581572642126	0.0	0.11121795110733143	0.012823097271103043	6.169190013377001	3.5002953890800006	684.00204848	0.09276335877892533	0.10218668947964983
1164655	0.00724052732471	0.00204910099274	0.0650945742673	9.483026214119999	0.0	0.00190995907231	0.0	0.0024568833154374023	0.00724052732471	6.171833551201048	3.5695510211664505	697.9563000892799	0.07589595949592594	0.08459490886083958
1164975	0.00447541621923	0.7271808366060001	1.13607886177	21.7330993902	0.0	0.100926879506	0.0	0.04436926348053037	0.010772784391288872	2.353843063116	1.7164781845304098	81.06925324939999	0.13343856879799215	0.10383396248199386
1165121	0.0967866888478	0.142701437118		10.4880260953	0.0	0.426991150442	0.0		0.059907071539079176	2.2253842317149	0.0	300.5610540193343	0.14502919541970288	0.0
1165005	0.0179301116895	0.4850317416130001	0.552222209721	207.739254763	0.0	0.0687147910389	0.0	0.07328119137143801	0.011738253207562369	0.6323682616351001	2.638693486543	216.154583992	0.10165054432860753	0.11053307886144212
1165399	0.0017332439386500002	0.121665066632	0.14269157924	14.1107887819	0.0	0.057610673135199984	0.0	0.0777019650833099	0.024615259323203315	9.665068763602001	10.705200626	70.5133379431	0.2074543665977227	0.3136801489534925
1165289	0.0482941735944	0.0	0.0	6.5184683317799985	0.0	0.0527892175215	0.0	0.05082890293602453	0.0482941735944	0.6898183788869999	0.578563802614	44.33178735688	0.12526613492667374	0.10264490450172437
1165099	0.0803599570179	0.924173493433	5.7827277187	7.82490262475	0.0	0.19697371914	0.0	0.5065747602182907	0.09199581819564412	1.7578640883729801	7.28723522316198	19.14715184328298	0.2514748525147211	0.619680204391213
1164909	0.0	12.9172805194	14.738377483099999	92.4235210959	0.0	0.205357142857	0.0	0.2260583378932711	0.02727256157366257	29.791199452576	95.73965036376998	879.0413676743001	0.16289233214153315	0.17147867937313904
1166333	0.0470355341572	0.0		1.05759411526	0.0	0.011783439490399998	0.0		0.0470355341572	0.113851937	0.0	11.16101587286	0.14065253377489134	0.02647312350394894
1165301	0.020747826238799998	0.396982591315	0.8809598740989999	15.0288647102	0.0	0.199559794571	0.0	0.3643237713167797	0.046388229679854086	1.415936423822	4.801176875098999	64.00583754862001	0.19450786794225616	0.4397925855624703
1164931	0.005052688441100001	0.027846308687		31.1263452194	0.0	0.0127612354355	0.0		0.005052688441100001	3.825580180246	1.13791438191641	82.9187622247	0.0910211859658959	0.05538193104248773
1164971	0.12418925534299999	0.314733734427	0.357046818317	9.24685534171	0.0	0.20261937522300005	0.0	0.21816542177901604	0.11450877516914845	1.046730240821	1.223255539793	20.07394556311	0.2108030133034155	0.2478848185926183
1164855	0.00603998105469	0.0		49.0390128304	0.0	0.0	0.0		0.00603998105469	9.323260968107098	12.929542613923669	185.64484565740105	0.08429631431689757	0.09811754408814673
1165369	0.0	0.0		3.2954815444700003	0.0	0.0435176790571	0.0		0.004425318160040686	22.240541487507095	27.66792009702367	229.029353922901	0.13903648600764273	0.16080383728743175
1166391	0.0867916389422	1.8010656103099998		348.758074851	0.0	0.0328064419922	0.0		0.0867916389422	13.59749231061	38.510692894499996	689.570849886	0.13398592841857376	0.15104480985520455
1164801	0.35660166130300003	0.0	0.0	0.0	0.0	0.366666666667	0.0	0.408541338745826	0.015194645967039053	0.8396742795009999	0.7301165045069999	7.349460950179	0.17143888354181872	0.1581606924388111
1164777	0.00410961127888	0.506607542582	0.536730110587	25.9640959698	0.0	0.11165753884	0.0	0.10660970805788356	0.0050013659994316405	7.821201596902	9.150238978457	126.66929138379999	0.15499888168193424	0.15459079895327374
1165277	0.0827877285738	7.31459405432	8.61350886787	100.705195414	0.0	0.212862791912	0.0	0.21864911727619496	0.061218489539728485	25.536840246675002	26.781621499151	239.50782965511002	0.2869336482712055	0.27945334392527466
1165021	0.0655324599133	0.185229894589	0.191688725143	1.65628955537	0.0	0.0984572933651	0.0	0.19790147543896766	0.14141103724589135	2.852680004089	3.135579913273	97.99262208577	0.1829678021462696	0.26831658069612746
1164963	0.055488665119000004	0.937450784986	1.10608620397	155.971242006	0.0	0.151952163208	0.0	0.14255060678939946	0.0704557041852999	2.193298910426	3.34924598338	189.8772329851	0.1955071955074928	0.2716202736803733
1166473	0.255421308673	0.529481775651		74.277124389	0.0	0.12836815016699998	0.0		0.14991096179107333	1.034717489645	0.0	120.56626371521	0.1599117937802864	0.0
1164803	0.254755579418	0.0269561400637	0.0226999074221	0.497287724633	0.0	0.197508896797	0.0	0.14962870368725495	0.01809722649172272	0.8666304195646999	0.7528164119291	7.846748674812	0.1717721806216804	0.1559122449170508
1164831	0.0	0.0		0.290216555208	0.0	0.0	0.0		0.0	1.5048433156137788	0.0917177964002	33.780670265308	0.06476544888538695	0.04208329437486644
1166449	0.41281044124399996	0.116223767749	0.00261177006178	1.86430000502	0.0	0.639308855292	0.0	0.0659998213447447	0.2335563361948355	10.678042511959	18.63989244151178	627.81129304892	0.1839838739236632	0.2678169653337767
[truncated: 66,162 more rows]
